# Supplementary material for: Iron-catalyzed remote functionalization of inert C(sp3)–H bonds of alkenes via 1,n-hydrogen-atom-transfer by C-centered radical relay
Source: Royal Society of Chemistry journal article supplement (doi:10.1039/d0sc03987j), 2020-01-01

**Iron-catalyzed remote functionalization of inert C(sp<sup>3</sup>)-H bonds of alkenes via  
1,n-hydrogen-atom-transfer by C-centered radical relay**

Kang-Jie Bian, Yan Li, Kai-Fan Zhang, Yan He, Tian-Rui Wu, Cheng-Yu Wang, Xi-Sheng Wang

Hefei National Laboratory for Physical Sciences at the Microscale and Department of Chemistry, Center for Excellence in Molecular Synthesis of CAS, University of Science and Technology of China, 96 Jinzhai Road, Hefei, Anhui 230026, P. R. China

Contents

|                                                                |    |
|----------------------------------------------------------------|----|
| I. General Information .....                                   | 2  |
| II. Optimization of Conditions .....                           | 3  |
| III. Synthesis and Characterization of New Molecules .....     | 6  |
| General procedure A for substrates synthesis .....             | 6  |
| General procedure B for remote azidotrifluoromethylation ..... | 14 |
| Derivatization studies.....                                    | 28 |
| IV. Mechanistic Research.....                                  | 29 |
| 1,5- or 1,6-deuterium shift .....                              | 29 |
| KIE experiments .....                                          | 31 |
| V. Alternative Testings .....                                  | 36 |
| Reference .....                                                | 37 |
| NMR Spectrum Data for New Compounds .....                      | 38 |

## I. General Information

NMR spectra were recorded on Bruker-400 (400 MHz for  $^1\text{H}$ ; 101 MHz for  $^{13}\text{C}$  and 376 MHz for  $^{19}\text{F}$  instruments internally referenced to  $\text{SiMe}_4$  signal for  $^1\text{H}$ , and  $\text{CDCl}_3$  for  $^{13}\text{C}$  (note: some of the NMR spectra were recorded on Bruker-500 (500 MHz for  $^1\text{H}$ ; 126 MHz for  $^{13}\text{C}$  and 471 MHz for  $^{19}\text{F}$ ). High resolution mass spectra were recorded on P-SIMS-Gly of Bruker Daltonics Inc. using ESI-TOF (electrospray ionization-time of flight) or Micromass GCT using EI (electron impact). Cu salts, Fe salts,  $\text{TMSN}_3$ , and superdry solvent were obtained from J&K, STREM (high quality >99%) and used as received. Togni-II reagent<sup>1</sup> and  $\text{BIOH}^2$  was synthesized according to reported method.

## II. Optimization of Conditions

### Optimization of Reaction Condition (Catalyst)

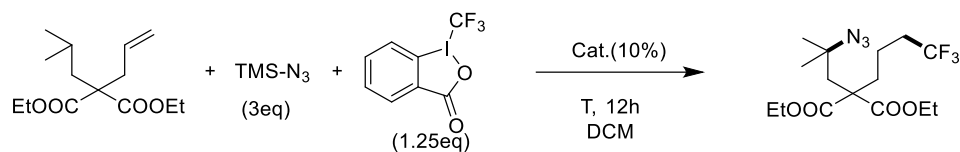

| Entry | Cat.                                                               | T  | solvent | Yield (%) <sup>a</sup>            | Entry           | Cat.                  | T  | solvent         | Yield (%) <sup>a</sup> |
|-------|--------------------------------------------------------------------|----|---------|-----------------------------------|-----------------|-----------------------|----|-----------------|------------------------|
| 1     | FeCl <sub>2</sub>                                                  | 50 | DCM     | 42                                | 9               | Fe(acac) <sub>3</sub> | 60 | DCM             | 71                     |
| 2     | Fe(OTf) <sub>2</sub>                                               | 50 | DCM     | 18                                | 10              | FeF <sub>2</sub>      | 50 | DCM             | 72                     |
| 3     | FeCp <sub>2</sub>                                                  | 50 | DCM     | 27                                | 11              | CoCl <sub>2</sub>     | 50 | DCM             | 21                     |
| 4     | Fe(BF <sub>4</sub> ) <sub>2</sub> ·6H <sub>2</sub> O               | 50 | DCM     | 20                                | 12              | Nil <sub>2</sub>      | 50 | DCM             | 20                     |
| 5     | Fe(OAc) <sub>2</sub>                                               | 50 | DCM     | 50                                | 13              | MnBr <sub>2</sub>     | 50 | DCM             | trace                  |
| 6     | Fe <sub>2</sub> (SO <sub>4</sub> ) <sub>3</sub> ·xH <sub>2</sub> O | 50 | DCM     | 57                                | 14 <sup>d</sup> | CuTc                  | 30 | DCM/1,4-dioxane | 30                     |
| 7     | Fe(acac) <sub>3</sub>                                              | 50 | DCM     | 84 <sup>b</sup> (82) <sup>c</sup> | 15 <sup>e</sup> | CuI                   | 45 | DCE             | 45                     |
| 8     | Fe(acac) <sub>3</sub>                                              | 40 | DCM     | 73                                | 16 <sup>f</sup> | CuI                   | 80 | DCM/1,4-dioxane | 40                     |

<sup>a</sup> yield was determined by <sup>1</sup>H NMR with CH<sub>2</sub>Br<sub>2</sub> as internal standard. <sup>b</sup> 1,6: 1,2> 139:1. <sup>c</sup> the isolated yield. <sup>d</sup> 1,6: 1,2> 5:1. <sup>e</sup> Liu's conditions: 1,6:1,2 = 4.5:1. <sup>f</sup> Sodeoka's conditions: 1,6:1,2 = 4:1.

### Optimization of Reaction Condition (Ligand)

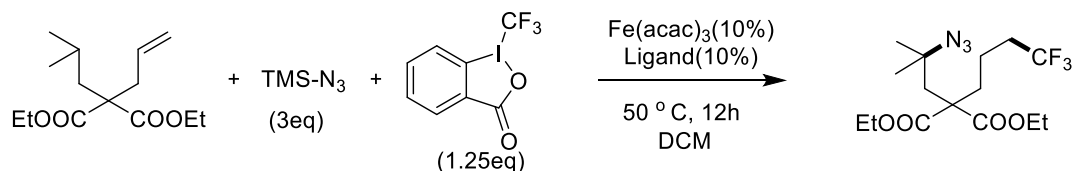

| Entry | Ligand(10%) | T  | Conc. (M) | Yield (%) <sup>a</sup> |
|-------|-------------|----|-----------|------------------------|
| 1     |             | 50 | 0.1       | 75 (1,6:1,2= 9:1)      |
| 2     |             | 50 | 0.1       | 79 (1,6: 1,2= 10:1)    |
| 3     |             | 50 | 0.1       | 72 (1,6: 1,2= 8:1)     |

<sup>a</sup> yield was determined by <sup>1</sup>H NMR with CH<sub>2</sub>Br<sub>2</sub> as internal standard.

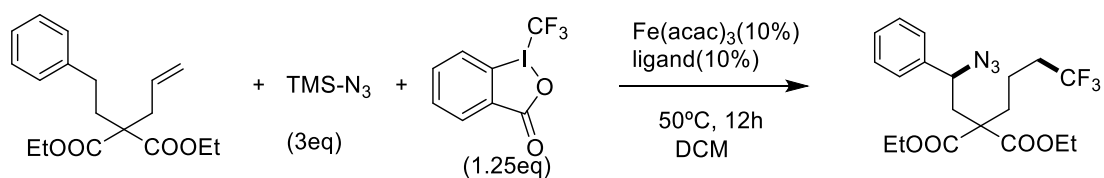

| Entry | Ligand(10%) | T  | Conc. (M) | Yield (%) <sup>a</sup> |
|-------|-------------|----|-----------|------------------------|
| 4     |             | 50 | 0.1       | 76                     |
| 5     |             | 50 | 0.1       | 72                     |
| 6     |             | 50 | 0.1       | 64                     |
| 7     |             | 50 | 0.1       | 68                     |
| 8     |             | 50 | 0.1       | 72                     |
| 9     |             | 50 | 0.1       | 68                     |
| 10    |             | 50 | 0.1       | 68                     |

<sup>a</sup> yield was determined by <sup>1</sup>H NMR with CH<sub>2</sub>Br<sub>2</sub> as internal standard.

### Optimization of Reaction Condition (Solvent)

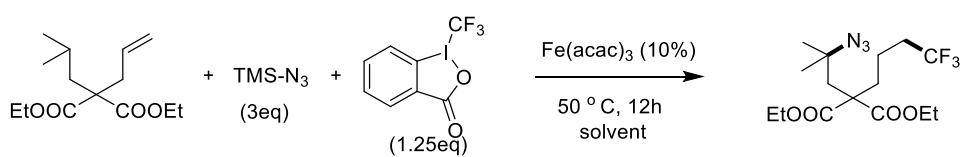

| Entry | Cat.                  | T  | solvent            | Yield (%) <sup>a</sup> | Entry | Cat.                  | T  | solvent | Yield (%) <sup>a</sup> |
|-------|-----------------------|----|--------------------|------------------------|-------|-----------------------|----|---------|------------------------|
| 1     | Fe(acac) <sub>3</sub> | 50 | DCM                | 84 (82) <sup>b</sup>   | 5     | Fe(acac) <sub>3</sub> | 50 | DCE     | 82                     |
| 2     | Fe(acac) <sub>3</sub> | 50 | CH <sub>3</sub> CN | 73                     | 6     | Fe(acac) <sub>3</sub> | 50 | DMA     | 57                     |
| 3     | Fe(acac) <sub>3</sub> | 50 | 1,4-Dioxane        | 59                     | 7     | Fe(acac) <sub>3</sub> | 50 | Toluene | 55                     |
| 4     | Fe(acac) <sub>3</sub> | 50 | THF                | 28                     | 8     | Fe(acac) <sub>3</sub> | 50 | MeOH    | trace                  |

<sup>a</sup>yield was determined by <sup>1</sup>H NMR with CH<sub>2</sub>Br<sub>2</sub> as internal standard. <sup>b</sup>the isolated yield.



## Optimization of Reaction Condition for S13

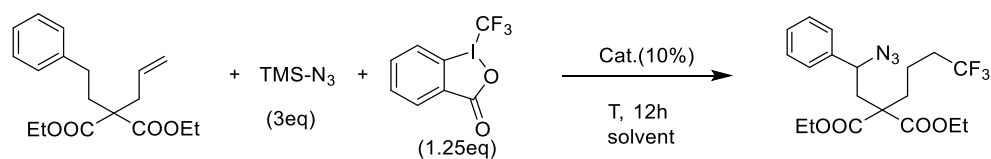

| Entry          | Cat.                  | T  | solvent         | Yield (%) <sup>a</sup> | Entry | Cat.                  | T  | solvent            | Yield (%) <sup>a</sup> |
|----------------|-----------------------|----|-----------------|------------------------|-------|-----------------------|----|--------------------|------------------------|
| 1 <sup>b</sup> | CuI                   | 45 | DCE             | 52                     | 12    | FeCl <sub>2</sub>     | 50 | DCM                | 72                     |
| 2              | CuI                   | 40 | MeCN            | 45                     | 13    | FeCl <sub>3</sub>     | 50 | DCM                | trace                  |
| 3              | CuI                   | 40 | 1,4-Dioxane     | 44                     | 14    | FeBr <sub>3</sub>     | 50 | DCM                | 12                     |
| 4              | CuTc                  | 40 | DCM             | 64                     | 15    | Fe(acac) <sub>3</sub> | 50 | DCM                | 80 (85) <sup>c</sup>   |
| 5              | CuTc                  | 30 | DCM             | 60                     | 16    | Fe(acac) <sub>3</sub> | 50 | 1,4-Dioxane        | 44                     |
| 6              | CuTc                  | 30 | DCM/dioxane=1:1 | 68                     | 17    | Fe(acac) <sub>3</sub> | 50 | CH <sub>3</sub> CN | 47                     |
| 7              | Fe(OAc) <sub>2</sub>  | 30 | DCM             | 48                     | 18    | Fe(acac) <sub>3</sub> | 50 | Toluene            | trace                  |
| 8              | Fe(OAc) <sub>2</sub>  | 40 | DCM             | 64                     | 19    | Fe(acac) <sub>3</sub> | 50 | MeOH               | 48                     |
| 9              | Fe(OAc) <sub>2</sub>  | 50 | DCM             | 77                     | 20    | Fe(acac) <sub>3</sub> | 50 | Acetone            | 70                     |
| 10             | Fe(OTf) <sub>2</sub>  | 50 | DCM             | 65                     | 21    | Fe(acac) <sub>3</sub> | 50 | EA                 | 64                     |
| 11             | Fe(acac) <sub>2</sub> | 50 | DCM             | 76                     | 22    | Fe(acac) <sub>3</sub> | 50 | DMF                | 40                     |

<sup>a</sup>yield was determined by <sup>1</sup>H NMR with CH<sub>2</sub>Br<sub>2</sub> as internal standard. <sup>b</sup>Liu's conditions. <sup>c</sup>the isolated yield.

### III. Synthesis and Characterization of New Molecules

All Substrates were synthesized through the known method.<sup>3,4</sup>

#### General procedure A for substrates synthesis

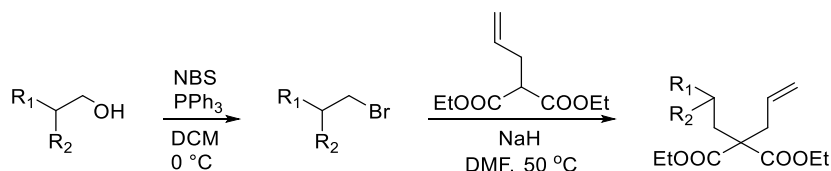

To a solution of alcohol (10 mmol) in dichloromethane (20 mL) was added triphenylphosphine (15 mmol, 1.5 equiv) and N-Bromosuccinimide (15 mmol, 1.5 equiv) in one patch in an ice bath. After reaction reached completion, monitored by TLC, it was quenched with saturated aqueous  $\text{NaHCO}_3$ . The aqueous layer was extracted with dichloromethane three times, and the combined organic phase was washed with brine (20 mL), dried over anhydrous  $\text{Na}_2\text{SO}_4$ , filtered and concentrated under vacuum. The residue was then purified by flash column chromatography to give the alkyl bromide.

To a solution of diethyl allylmalonate (1.0 equiv) in DMF (0.5 M) was added NaH (1.5 equiv) slowly in an ice bath. After 20 mins when solution stopped bubbling at room temperature, the afforded alkyl bromide (1.2 equiv) was added into the mixture dropwise. The resulting solution was stirred at  $50\text{ }^\circ\text{C}$  under air and monitored by TLC. Upon completion, the reaction was quenched with saturated aqueous  $\text{NH}_4\text{Cl}$ , and the aqueous layer was extracted with EtOAc three times. The combined organic phase was washed with brine (20 mL), dried over anhydrous  $\text{Na}_2\text{SO}_4$ , filtered and concentrated under vacuum. The residue was then purified by flash column chromatography to give the target substrate.

**S1**

Prepared according to general procedure A and obtained as colorless oil.  $^1\text{H}$  NMR (400 MHz,  $\text{CDCl}_3$ )  $\delta$  5.73 – 5.56 (m, 1H), 5.14 – 5.03 (m, 2H), 4.17 (qd,  $J = 7.1, 2.9\text{ Hz}$ , 4H), 2.69 (d,  $J = 7.4\text{ Hz}$ , 2H), 1.87 (d,  $J = 6.3\text{ Hz}$ , 2H), 1.74 – 1.62 (m, 1H), 1.25 (t,  $J = 7.1\text{ Hz}$ , 6H), 0.88 (d,  $J = 6.6\text{ Hz}$ , 6H).  $^{13}\text{C}$  NMR (101 MHz,  $\text{CDCl}_3$ )  $\delta$  171.83, 132.91, 118.90, 61.23, 57.07, 40.63, 37.28, 24.06, 23.78, 14.20. HRMS ESI ( $m/z$ ):  $[\text{M}+\text{Na}]^+$  calcd. for  $\text{C}_{14}\text{H}_{24}\text{NaO}_4$ : 279.1572, found: 279.1569.

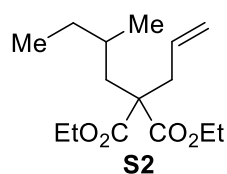

Prepared according to general procedure A and obtained as colorless oil.  $^1\text{H}$  NMR (400 MHz,  $\text{CDCl}_3$ )  $\delta$  5.74 – 5.58 (m, 1H), 5.16 – 5.04 (m, 2H), 4.26 – 4.08 (m, 4H), 2.78 – 2.59 (m, 2H), 1.97 (dd,  $J$  = 14.6, 4.5 Hz, 1H), 1.77 (dd,  $J$  = 14.6, 7.6 Hz, 1H), 1.51 – 1.27 (m, 2H), 1.24 (td,  $J$  = 7.1, 2.4 Hz, 6H), 1.21 – 1.06 (m, 1H), 0.85 (t,  $J$  = 7.0 Hz, 3H), 0.84 (d,  $J$  = 7.0 Hz, 3H).  $^{13}\text{C}$  NMR (101 MHz,  $\text{CDCl}_3$ )  $\delta$  172.00, 171.76, 132.90, 118.91, 61.23, 61.19, 57.08, 38.76, 37.31, 30.82, 30.22, 20.04, 14.21, 14.17, 11.40. HRMS ESI ( $m/z$ ):  $[\text{M}+\text{Na}]^+$  calcd. for  $\text{C}_{15}\text{H}_{26}\text{NaO}_4$ : 293.1729, found: 293.1726.

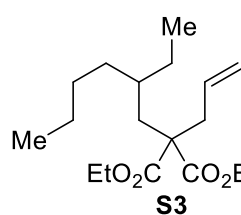

Prepared according to general procedure A and obtained as colorless oil.  $^1\text{H}$  NMR (500 MHz,  $\text{CDCl}_3$ )  $\delta$  5.75 – 5.57 (m, 1H), 5.17 – 5.00 (m, 2H), 4.26 – 4.02 (m, 4H), 2.67 (d,  $J$  = 7.3 Hz, 2H), 1.93 – 1.80 (m, 2H), 1.40 – 1.32 (m, 1H), 1.30 – 1.15 (m, 5H), 1.24 (t,  $J$  = 7.0 Hz, 9H), 0.88 (t,  $J$  = 6.8 Hz, 3H), 0.81 (t,  $J$  = 7.3 Hz, 3H).  $^{13}\text{C}$  NMR (126 MHz,  $\text{CDCl}_3$ )  $\delta$  171.97, 171.92, 132.85, 118.99, 61.22, 57.15, 37.22, 35.76, 34.23, 33.41, 28.54, 26.33, 23.23, 14.30, 14.18, 10.42. HRMS ESI ( $m/z$ ):  $[\text{M}+\text{Na}]^+$  calcd. for  $\text{C}_{18}\text{H}_{32}\text{NaO}_4$ : 335.2198, found: 335.2205.

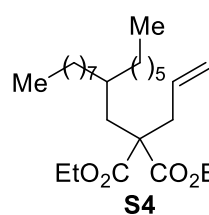

Prepared according to general procedure A and obtained as colorless oil.  $^1\text{H}$  NMR (400 MHz,  $\text{CDCl}_3$ )  $\delta$  5.73 – 5.59 (m, 1H), 5.16 – 5.00 (m, 2H), 4.24 – 4.06 (m, 4H), 2.67 (d,  $J$  = 7.3 Hz, 2H), 1.87 (d,  $J$  = 5.7 Hz, 2H), 1.44 – 1.14 (m, 31H), 0.88 (t,  $J$  = 6.7 Hz, 6H).  $^{13}\text{C}$  NMR (101 MHz,  $\text{CDCl}_3$ )  $\delta$  171.90, 132.91, 118.91, 61.19, 57.22, 37.25, 36.36, 34.27, 33.15, 32.05, 30.23, 29.90, 29.79, 29.49, 26.31, 26.28, 22.82, 14.26, 14.18. HRMS ESI ( $m/z$ ):  $[\text{M}+\text{Na}]^+$  calcd. for  $\text{C}_{26}\text{H}_{48}\text{NaO}_4$ : 447.3450, found: 447.3443.

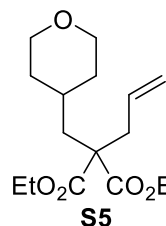

Prepared according to general procedure A and obtained as colorless oil.  $^1\text{H}$  NMR (400 MHz,  $\text{CDCl}_3$ )  $\delta$  5.70 – 5.59 (m, 1H), 5.17 – 5.04 (m, 2H), 4.23 – 4.13 (m, 4H), 3.89 (dd,  $J$  = 11.0, 3.1 Hz, 2H), 3.34 (td,  $J$  = 11.8, 2.0 Hz, 2H), 2.69 (d,  $J$  = 7.4 Hz, 2H), 1.89 (d,  $J$  = 6.1 Hz, 2H), 1.66 – 1.55 (m, 1H), 1.54 – 1.46 (m, 2H), 1.38 – 1.27 (m, 2H), 1.25 (t,  $J$  = 7.1 Hz, 6H).  $^{13}\text{C}$  NMR (101 MHz,  $\text{CDCl}_3$ )  $\delta$  171.61, 132.59, 119.14, 68.00, 61.35, 56.54, 39.01, 37.58, 33.81, 30.98, 14.18. HRMS ESI ( $m/z$ ):  $[\text{M}+\text{Na}]^+$  calcd. for  $\text{C}_{16}\text{H}_{26}\text{NaO}_5$ : 321.1678, found: 321.1678.

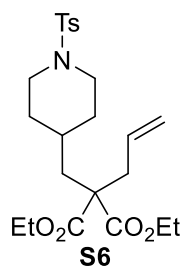

Prepared according to general procedure A and obtained as yellowish solid.  $^1\text{H}$  NMR (500 MHz,  $\text{CDCl}_3$ )  $\delta$  7.61 (d,  $J = 7.8$  Hz, 2H), 7.32 (d,  $J = 7.8$  Hz, 2H), 5.63 – 5.51 (m, 1H), 5.10 – 5.01 (m, 2H), 4.21 – 4.08 (m, 4H), 3.69 (d,  $J = 11.5$  Hz, 2H), 2.60 (d,  $J = 7.3$  Hz, 2H), 2.44 (s, 3H), 2.16 (t,  $J = 11.5$  Hz, 2H), 1.84 (d,  $J = 5.5$  Hz, 2H), 1.62 (d,  $J = 12.5$  Hz, 2H), 1.40 – 1.26 (m, 3H), 1.23 (t,  $J = 7.1$  Hz, 6H).  $^{13}\text{C}$  NMR (126 MHz,  $\text{CDCl}_3$ )  $\delta$  171.51, 143.65, 132.36, 129.76, 127.87, 119.36, 61.48, 56.49, 46.49, 38.11, 37.45, 32.21, 31.05, 21.69, 14.19. HRMS ESI ( $m/z$ ):  $[\text{M}+\text{Na}]^+$  calcd. for  $\text{C}_{23}\text{H}_{33}\text{NO}_6\text{SNa}$ : 474.1926, found: 474.1935

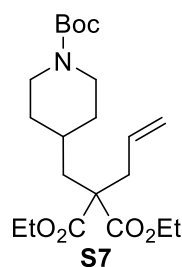

Prepared according to general procedure A and obtained as colorless oil.  $^1\text{H}$  NMR (400 MHz,  $\text{CDCl}_3$ )  $\delta$  5.71 – 5.55 (m, 1H), 5.16 – 5.05 (m, 2H), 4.18 (q,  $J = 7.1$  Hz, 4H), 4.13 – 3.95 (m, 2H), 2.75 – 2.59 (m, 2H), 2.63 (d,  $J = 7.4$  Hz, 2H), 1.95 – 1.84 (m, 2H), 1.66 (d,  $J = 12.5$  Hz, 2H), 1.45 (s, 9H), 1.24 (t,  $J = 7.1$  Hz, 6H), 1.12 – 1.03 (m, 3H).  $^{13}\text{C}$  NMR (101 MHz,  $\text{CDCl}_3$ )  $\delta$  171.35, 154.95, 132.49, 119.05, 79.33, 61.30, 57.28, 36.76, 36.36, 32.17, 30.55, 29.34, 28.58, 14.26. HRMS ESI ( $m/z$ ):  $[\text{M}+\text{Na}]^+$  calcd. for  $\text{C}_{21}\text{H}_{35}\text{NaO}_6$ : 420.2362, found: 420.2356.

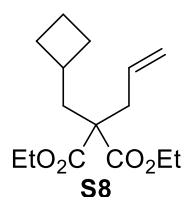

Prepared according to general procedure A and obtained as colorless oil.  $^1\text{H}$  NMR (400 MHz,  $\text{CDCl}_3$ )  $\delta$  5.69 – 5.57 (m, 1H), 5.17 – 5.00 (m, 2H), 4.22 – 4.08 (m, 4H), 2.62 (d,  $J = 7.3$  Hz, 2H), 2.37 – 2.24 (m, 1H), 1.98 (dd,  $J = 17.5, 4.7$  Hz, 4H), 1.88 – 1.77 (m, 1H), 1.74 – 1.60 (m, 3H), 1.24 (t,  $J = 7.1$  Hz, 6H).  $^{13}\text{C}$  NMR (101 MHz,  $\text{CDCl}_3$ )  $\delta$  171.51, 132.85, 118.89, 61.17, 56.94, 39.17, 37.05, 31.96, 29.53, 19.09, 14.20. HRMS ESI ( $m/z$ ):  $[\text{M}+\text{Na}]^+$  calcd. for  $\text{C}_{15}\text{H}_{24}\text{NaO}_4$ : 291.1572, found: 291.1573.

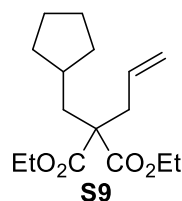

Prepared according to general procedure A and obtained as colorless oil.  $^1\text{H}$  NMR (400 MHz,  $\text{CDCl}_3$ )  $\delta$  5.73 – 5.59 (m, 1H), 5.15 – 5.03 (m, 2H), 4.24 – 4.11 (m, 4H), 2.70 (d,  $J = 7.4$  Hz, 2H), 2.01 (d,  $J = 5.6$  Hz, 2H), 1.79 – 1.68 (m, 3H), 1.66 – 1.54 (m, 2H), 1.53 – 1.42 (m, 2H), 1.24 (t,  $J = 7.1$  Hz, 6H), 1.12 – 1.00 (m, 2H).  $^{13}\text{C}$  NMR (101 MHz,  $\text{CDCl}_3$ )  $\delta$  171.84, 132.90, 118.90, 61.20, 57.41, 38.00, 37.20, 36.02, 33.64, 24.95, 14.21. HRMS ESI ( $m/z$ ):  $[\text{M}+\text{Na}]^+$  calcd. for  $\text{C}_{16}\text{H}_{26}\text{NaO}_4$ : 305.1729, found: 305.1720.

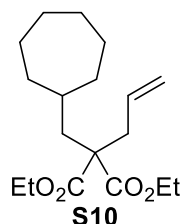

Prepared according to general procedure A and obtained as colorless oil.  $^1\text{H}$  NMR (400 MHz,  $\text{CDCl}_3$ )  $\delta$  5.73 – 5.58 (m, 1H), 5.15 – 5.01 (m, 2H), 4.23 – 4.10 (m, 4H), 2.67 (d,  $J = 7.4$  Hz, 2H), 1.87 (d,  $J = 5.5$  Hz, 2H), 1.65 – 1.51 (m, 7H), 1.51 – 1.31 (m, 4H), 1.29 – 1.13 (m, 2H),

1.24 (t,  $J = 7.1$  Hz, 6H).  $^{13}\text{C}$  NMR (101 MHz,  $\text{CDCl}_3$ )  $\delta$  171.84, 132.96, 118.89, 61.19, 57.25, 40.13, 37.55, 35.81, 34.99, 28.51, 26.18, 14.20. HRMS ESI ( $m/z$ ):  $[\text{M}+\text{Na}]^+$  calcd. for  $\text{C}_{18}\text{H}_{30}\text{NaO}_4$ : 333.2042, found: 333.2037.

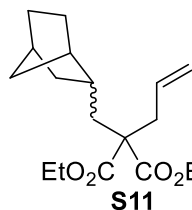

Prepared according to general procedure A and obtained as colorless oil.  $^1\text{H}$  NMR (500 MHz,  $\text{CDCl}_3$ )  $\delta$  5.72 – 5.56 (m, 1H), 5.15 – 5.00 (m, 2H), 4.28 – 4.00 (m, 4H), 2.84 – 1.67 (m, 6H), 1.60 – 1.52 (m, 1H), 1.51 – 1.39 (m, 2H), 1.34 – 1.20 (m, 9H), 1.15 – 0.98 (m, 2H), 0.67 – 0.53 (m, 1H).  $^{13}\text{C}$  NMR (126 MHz,  $\text{CDCl}_3$ )  $\delta$  171.93, 171.74, 132.89, 118.95, 61.24, 61.18, 57.48, 42.58, 41.56, 40.27, 40.03, 37.74, 37.56, 37.35, 37.19, 36.68, 35.71, 35.52, 35.38, 30.39, 30.13, 28.64, 22.57, 14.23, 14.20. HRMS ESI ( $m/z$ ):  $[\text{M}+\text{Na}]^+$  calcd. for  $\text{C}_{18}\text{H}_{28}\text{NaO}_4$ : 331.1885, found: 331.1896.

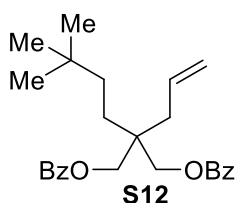

Prepared according to general procedure A and obtained as colorless oil.  $^1\text{H}$  NMR (400 MHz,  $\text{CDCl}_3$ )  $\delta$  8.06 – 7.99 (m, 4H), 7.59 – 7.53 (m, 2H), 7.46 – 7.40 (m, 4H), 5.93 – 5.75 (m, 1H), 5.18 – 5.07 (m, 2H), 4.30 (s, 4H), 2.30 (d,  $J = 7.5$  Hz, 2H), 1.53 – 1.46 (m, 2H), 1.31 – 1.23 (m, 2H), 0.88 (s, 9H).  $^{13}\text{C}$  NMR (101 MHz,  $\text{CDCl}_3$ )  $\delta$  166.47, 133.17, 132.60, 130.21, 129.68, 128.58, 119.25, 66.84, 40.36, 36.40, 36.36, 30.34, 29.39, 26.28. ESI ( $m/z$ ):  $[\text{M}+\text{Na}]^+$  calcd. for  $\text{C}_{26}\text{H}_{32}\text{NaO}_4$ : 431.2198, found: 431.2202.

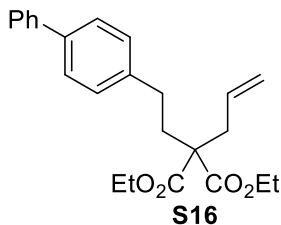

Prepared according to general procedure A and obtained as colorless oil.  $^1\text{H}$  NMR (400 MHz,  $\text{CDCl}_3$ )  $\delta$  7.57 (d,  $J = 7.3$  Hz, 2H), 7.51 (d,  $J = 8.1$  Hz, 2H), 7.43 (t,  $J = 7.6$  Hz, 2H), 7.33 (t,  $J = 7.3$  Hz, 1H), 7.25 (d,  $J = 9.5$  Hz, 2H), 5.76 – 5.65 (m, 1H), 5.21 – 5.12 (m, 2H), 4.21 (q,  $J = 7.1$  Hz, 4H), 2.76 (d,  $J = 7.4$  Hz, 2H), 2.61 – 2.54 (m, 2H), 2.25 – 2.18 (m, 2H), 1.28 (t,  $J = 7.1$  Hz, 6H).  $^{13}\text{C}$  NMR (101 MHz,  $\text{CDCl}_3$ )  $\delta$  171.24, 141.13, 140.66, 139.17, 132.53, 128.93, 128.86, 127.29, 127.20, 127.14, 119.26, 61.44, 57.38, 37.31, 34.32, 30.21, 14.32. HRMS ESI ( $m/z$ ):  $[\text{M}+\text{Na}]^+$  calcd. for  $\text{C}_{24}\text{H}_{28}\text{NaO}_4$ : 403.1885, found: 403.1885.

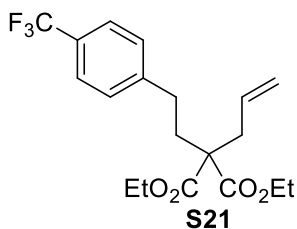

Prepared according to general procedure A and obtained as colorless oil.  $^1\text{H}$  NMR (400 MHz,  $\text{CDCl}_3$ )  $\delta$  7.53 (d,  $J = 7.9$  Hz, 2H), 7.28 (d,  $J = 8.3$  Hz, 2H), 5.76 – 5.61 (m, 1H), 5.23 – 5.11 (m, 2H), 4.21 (q,  $J = 7.1$  Hz, 4H), 2.75 (d,  $J = 7.4$  Hz, 2H), 2.63 – 2.54 (m, 2H), 2.19 – 2.11 (m, 2H), 1.27 (t,  $J = 7.1$  Hz, 6H).  $^{13}\text{C}$  NMR (101 MHz,  $\text{CDCl}_3$ )  $\delta$  170.95, 145.56, 132.23, 128.70, 128.44 (q,  $J$

= 32.2 Hz), 125.35 (q,  $J = 3.8$  Hz), 124.23 (q,  $J = 2.7$  Hz), 119.26, 61.40, 57.09, 37.26, 34.02, 30.38, 14.16. HRMS ESI ( $m/z$ ):  $[M+Na]^+$  calcd. for  $C_{19}H_{23}F_3NaO_4$ : 395.1446, found: 395.1446.

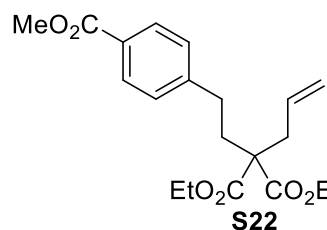

Prepared according to general procedure A and obtained as colorless oil.  $^1H$  NMR (400 MHz,  $CDCl_3$ )  $\delta$  7.95 (d,  $J = 8.4$  Hz, 2H), 7.23 (d,  $J = 8.4$  Hz, 2H), 5.78 – 5.62 (m, 1H), 5.25 – 5.06 (m, 2H), 4.21 (q,  $J = 7.1$  Hz, 4H), 3.90 (s, 3H), 2.75 (d,  $J = 7.4$  Hz, 2H), 2.64 – 2.54 (m, 2H), 2.23 – 2.12

(m, 2H), 1.27 (t,  $J = 7.1$  Hz, 6H).  $^{13}C$  NMR (101 MHz,  $CDCl_3$ )  $\delta$  171.03, 167.11, 147.01, 132.36, 129.86, 128.50, 128.14, 119.30, 61.44, 57.23, 52.10, 37.30, 34.00, 30.65, 14.25. HRMS ESI ( $m/z$ ):  $[M+Na]^+$  calcd. for  $C_{20}H_{26}NaO_6$ : 385.1627, found: 385.1824.

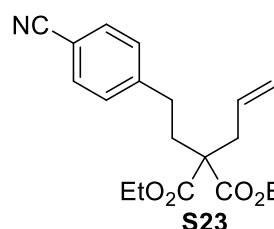

Prepared according to general procedure A and obtained as colorless oil.  $^1H$  NMR (400 MHz,  $CDCl_3$ )  $\delta$  7.57 (d,  $J = 8.1$  Hz, 2H), 7.27 (d,  $J = 8.1$  Hz, 2H), 5.74 – 5.59 (m, 1H), 5.22 – 5.10 (m, 2H), 4.21 (q,  $J = 7.1$  Hz, 4H), 2.74 (d,  $J = 7.4$  Hz, 2H), 2.67 – 2.55 (m, 2H), 2.20 – 2.10 (m, 2H), 1.27 (t,  $J = 7.1$  Hz,

6H).  $^{13}C$  NMR (101 MHz,  $CDCl_3$ )  $\delta$  170.95, 147.23, 132.39, 132.27, 129.32, 119.44, 119.10, 110.13, 61.56, 57.14, 37.43, 33.96, 30.85, 14.27. HRMS ESI ( $m/z$ ):  $[M+Na]^+$  calcd. for  $C_{19}H_{23}NNaO_4$ : 352.1525, found: 352.1521.

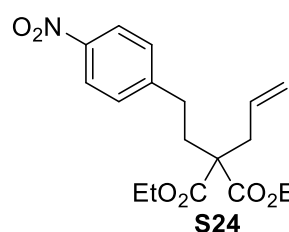

Prepared according to general procedure A and obtained as white solid.  $^1H$  NMR (400 MHz,  $CDCl_3$ )  $\delta$  8.15 (d,  $J = 8.7$  Hz, 2H), 7.33 (d,  $J = 8.6$  Hz, 2H), 5.75 – 5.60 (m, 1H), 5.23 – 5.13 (m, 2H), 4.22 (q,  $J = 7.1$  Hz, 4H), 2.75 (d,  $J = 7.4$  Hz, 2H), 2.70 – 2.62 (m, 2H), 2.21 – 2.12 (m, 2H), 1.28 (t,  $J = 7.1$  Hz,

6H).  $^{13}C$  NMR (101 MHz,  $CDCl_3$ )  $\delta$  170.93, 149.41, 146.59, 132.23, 129.33, 123.85, 119.50, 61.60, 57.12, 37.46, 33.98, 30.63, 14.27. HRMS ESI ( $m/z$ ):  $[M+Na]^+$  calcd. for  $C_{18}H_{23}NNaO_6$ : 372.1423, found: 372.1423.

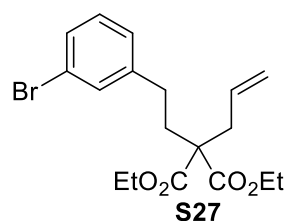

Prepared according to general procedure A and obtained as colorless oil.  $^1H$  NMR (400 MHz,  $CDCl_3$ )  $\delta$  7.32 (d,  $J = 6.8$  Hz, 2H), 7.14 (t,  $J = 8.0$  Hz, 1H), 7.09 (d,  $J = 7.6$  Hz, 1H), 5.75 – 5.61 (m, 1H), 5.22 – 5.10 (m, 2H), 4.20 (q,  $J = 7.1$  Hz, 4H), 2.73 (d,  $J = 7.3$  Hz, 2H), 2.58 – 2.42 (m, 2H), 2.20 – 2.08 (m,

2H), 1.27 (t,  $J = 7.1$  Hz, 6H).  $^{13}C$  NMR (101 MHz,  $CDCl_3$ )  $\delta$  171.09, 143.89, 132.39, 131.54, 130.11, 129.31, 127.20, 122.54, 119.35, 61.50, 57.25, 37.35, 34.19, 30.31, 14.29. HRMS ESI ( $m/z$ ):  $[M+Na]^+$  calcd. for  $C_{18}H_{23}BrNaO_4$ : 405.0677, found:

405.0677.

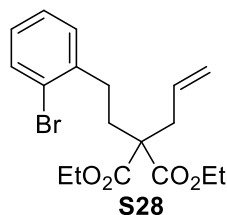

Prepared according to general procedure A and obtained as colorless oil.  $^1\text{H}$  NMR (400 MHz,  $\text{CDCl}_3$ )  $\delta$  7.51 (d,  $J = 7.9$  Hz, 1H), 7.27 – 7.17 (m, 2H), 7.13 – 7.00 (m, 1H), 5.82 – 5.65 (m, 1H), 5.25 – 5.09 (m, 2H), 4.22 (q,  $J = 7.1$  Hz, 4H), 2.77 (d,  $J = 7.4$  Hz, 2H), 2.72 – 2.62 (m, 2H), 2.19 – 2.11 (m, 2H), 1.28 (t,  $J = 7.1$  Hz, 6H).

$^{13}\text{C}$  NMR (101 MHz,  $\text{CDCl}_3$ )  $\delta$  171.07, 140.84, 132.89, 132.46, 130.52, 127.93, 127.70, 124.32, 119.27, 61.42, 57.34, 37.13, 32.74, 30.99, 14.28. HRMS ESI ( $m/z$ ):  $[\text{M}+\text{Na}]^+$  calcd. for  $\text{C}_{18}\text{H}_{23}\text{BrNaO}_4$ : 455.0677, found: 455.0668.

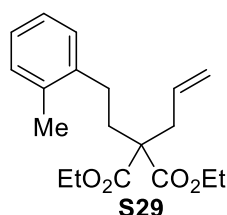

Prepared according to general procedure A and obtained as colorless oil.  $^1\text{H}$  NMR (400 MHz,  $\text{CDCl}_3$ )  $\delta$  7.19 – 7.02 (m, 4H), 5.77 – 5.65 (m, 1H), 5.24 – 5.10 (m, 2H), 4.22 (q,  $J = 7.1$  Hz, 4H), 2.77 (d,  $J = 7.4$  Hz, 2H), 2.55 – 2.45 (m, 2H), 2.29 (s, 3H), 2.14 – 2.04 (m, 2H), 1.32 – 1.24 (m, 6H).  $^{13}\text{C}$  NMR (101 MHz,  $\text{CDCl}_3$ )  $\delta$

171.26, 139.73, 135.96, 132.55, 130.35, 129.10, 126.35, 126.23, 119.24, 61.43, 57.47, 37.33, 33.25, 28.02, 19.24, 14.31. HRMS ESI ( $m/z$ ):  $[\text{M}+\text{Na}]^+$  calcd. for  $\text{C}_{19}\text{H}_{26}\text{NaO}_4$ : 341.1729, found: 341.1729.

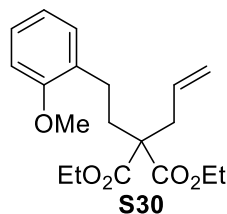

Prepared according to general procedure A and obtained as colorless oil.  $^1\text{H}$  NMR (400 MHz,  $\text{CDCl}_3$ )  $\delta$  7.18 (td,  $J = 8.0, 1.7$  Hz, 1H), 7.10 (dd,  $J = 7.4, 1.6$  Hz, 1H), 6.87 (td,  $J = 7.4, 1.1$  Hz, 1H), 6.83 (d,  $J = 8.2$  Hz, 1H), 5.81 – 5.65 (m, 1H), 5.24 – 5.07 (m, 2H), 4.20 (q,  $J = 7.1$  Hz, 4H), 3.80 (s, 3H), 2.76 (d,  $J = 7.4$  Hz, 2H),

2.56 – 2.47 (m, 2H), 2.20 – 2.09 (m, 2H), 1.26 (t,  $J = 7.1$  Hz, 6H).  $^{13}\text{C}$  NMR (101 MHz,  $\text{CDCl}_3$ )  $\delta$  171.38, 157.45, 132.69, 129.92, 129.87, 127.42, 120.52, 119.03, 110.27, 61.29, 57.56, 55.28, 36.81, 32.31, 24.97, 14.30. HRMS ESI ( $m/z$ ):  $[\text{M}+\text{Na}]^+$  calcd. for  $\text{C}_{19}\text{H}_{26}\text{NaO}_5$ : 357.1678, found: 357.1678.

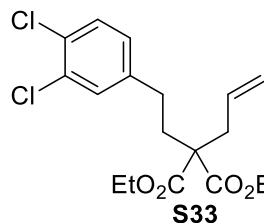

Prepared according to general procedure A and obtained as colorless oil.  $^1\text{H}$  NMR (400 MHz,  $\text{CDCl}_3$ )  $\delta$  7.33 (d,  $J = 8.2$  Hz, 1H), 7.25 (d,  $J = 1.9$  Hz, 1H), 6.99 (dd,  $J = 8.2, 2.0$  Hz, 1H), 5.73 – 5.62 (m, 1H), 5.20 – 5.08 (m, 2H), 4.20 (q,  $J = 7.1$  Hz, 4H), 2.72 (d,  $J = 7.4$  Hz, 2H), 2.56 – 2.43 (m, 2H), 2.19 – 2.07

(m, 2H), 1.27 (t,  $J = 7.1$  Hz, 6H).  $^{13}\text{C}$  NMR (101 MHz,  $\text{CDCl}_3$ )  $\delta$  171.02, 141.81, 132.40, 132.35, 130.45, 130.15, 128.00, 119.42, 61.55, 57.19, 37.46, 34.17, 29.87, 14.30. HRMS ESI ( $m/z$ ):  $[\text{M}+\text{Na}]^+$  calcd. for  $\text{C}_{18}\text{H}_{22}\text{Cl}_2\text{NaO}_4$ : 395.0793, found: 385.0787.

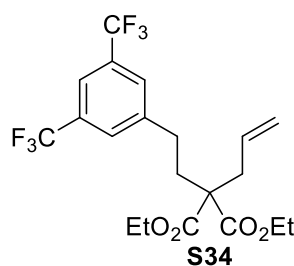

Prepared according to general procedure A and obtained as colorless oil.  $^1\text{H}$  NMR (400 MHz,  $\text{CDCl}_3$ )  $\delta$  7.72 (s, 1H), 7.61 (s, 2H), 5.76 – 5.60 (m, 1H), 5.28 – 5.08 (m, 2H), 4.37 – 4.07 (m, 4H), 2.76 (d,  $J$  = 7.3 Hz, 2H), 2.69 (dd,  $J$  = 10.5, 6.4 Hz, 2H), 2.22 – 2.07 (m, 2H), 1.29 (t,  $J$  = 7.1 Hz, 6H).  $^{13}\text{C}$  NMR (101 MHz,  $\text{CDCl}_3$ )  $\delta$  170.91, 144.00, 132.29, 132.23, 131.97, 131.64, 131.35, 128.68, 124.83, 122.12, 120.38, 119.58, 61.67, 57.14, 37.60, 34.17, 30.50, 14.27. HRMS ESI ( $m/z$ ):  $[\text{M}+\text{Na}]^+$  calcd. for  $\text{C}_{20}\text{H}_{22}\text{F}_6\text{NaO}_4$ : 463.1320, found: 463.1320.

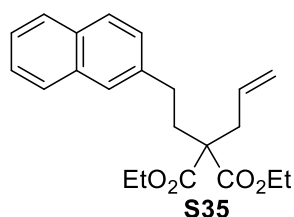

Prepared according to general procedure A and obtained as colorless oil.  $^1\text{H}$  NMR (400 MHz,  $\text{CDCl}_3$ )  $\delta$  7.80 (d,  $J$  = 7.4 Hz, 1H), 7.77 (d,  $J$  = 8.1 Hz, 2H), 7.60 (s, 1H), 7.47 – 7.39 (m, 2H), 7.31 (dd,  $J$  = 8.4, 1.5 Hz, 1H), 5.79 – 5.65 (m, 1H), 5.23 – 5.11 (m, 2H), 4.21 (q,  $J$  = 7.1 Hz, 4H), 2.78 (d,  $J$  = 7.4 Hz, 2H), 2.73 – 2.66 (m, 2H), 2.31 – 2.22 (m, 2H), 1.28 (t,  $J$  = 7.1 Hz, 6H).  $^{13}\text{C}$  NMR (101 MHz,  $\text{CDCl}_3$ )  $\delta$  171.27, 139.05, 133.71, 132.55, 132.17, 128.12, 127.74, 127.54, 127.32, 126.47, 126.10, 125.39, 119.28, 61.45, 57.45, 37.40, 34.29, 30.76, 14.32. HRMS ESI ( $m/z$ ):  $[\text{M}+\text{Na}]^+$  calcd. for  $\text{C}_{22}\text{H}_{26}\text{NaO}_4$ : 377.1729, found: 377.1729.

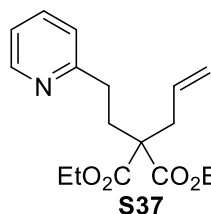

Prepared according to general procedure A and obtained as colorless oil.  $^1\text{H}$  NMR (400 MHz,  $\text{CDCl}_3$ )  $\delta$  8.52 (d,  $J$  = 4.3 Hz, 1H), 7.59 (td,  $J$  = 7.7, 1.8 Hz, 1H), 7.15 (d,  $J$  = 7.8 Hz, 1H), 7.11 (dd,  $J$  = 7.3, 5.5 Hz, 1H), 5.78 – 5.66 (m, 1H), 5.21 – 5.07 (m, 2H), 4.20 (qd,  $J$  = 7.1, 2.3 Hz, 4H), 2.79 – 2.69 (m, 4H), 2.36 – 2.25 (m, 2H), 1.26 (t,  $J$  = 7.1 Hz, 6H).  $^{13}\text{C}$  NMR (101 MHz,  $\text{CDCl}_3$ )  $\delta$  171.18, 161.25, 149.36, 136.53, 132.52, 122.83, 121.35, 119.22, 61.42, 57.37, 37.43, 33.11, 32.48, 14.26. HRMS ESI ( $m/z$ ):  $[\text{M}+\text{Na}]^+$  calcd. for  $\text{C}_{17}\text{H}_{23}\text{NNaO}_4$ : 328.1525, found: 328.1525.

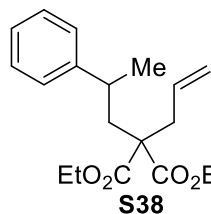

Prepared according to general procedure A and obtained as colorless oil.  $^1\text{H}$  NMR (400 MHz,  $\text{CDCl}_3$ )  $\delta$  7.29 – 7.23 (m, 2H), 7.20 – 7.10 (m, 3H), 5.66 – 5.50 (m, 1H), 5.12 – 4.98 (m, 2H), 4.10 (qd,  $J$  = 7.1, 1.4 Hz, 2H), 3.82 (dq,  $J$  = 10.8, 7.1 Hz, 1H), 3.58 (dq,  $J$  = 10.8, 7.1 Hz, 1H), 2.83 – 2.75 (m, 1H), 2.70 (dd,  $J$  = 14.4, 7.7 Hz, 1H), 2.60 (dd,  $J$  = 14.4, 7.2 Hz, 1H), 2.37 (dd,  $J$  = 14.6, 8.9 Hz, 1H), 2.21 (dd,  $J$  = 14.6, 4.2 Hz, 1H), 1.23 (d,  $J$  = 7.0 Hz, 3H), 1.21 (t,  $J$  = 7.1 Hz, 3H), 1.06 (t,  $J$  = 7.1 Hz, 3H).  $^{13}\text{C}$  NMR (101 MHz,  $\text{CDCl}_3$ )  $\delta$  171.50, 170.83, 146.66, 132.67, 128.31, 127.53,



126.30, 119.08, 61.27, 61.00, 57.00, 39.53, 36.94, 35.84, 25.02, 14.19, 13.93. HRMS ESI (m/z): [M+Na]<sup>+</sup> calcd. for C<sub>19</sub>H<sub>26</sub>NaO<sub>4</sub>: 341.1729, found: 341.1723.

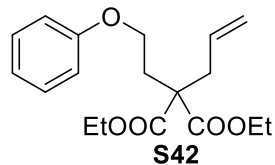

Prepared according to general procedure A and obtained as colorless oil. <sup>1</sup>H NMR (500 MHz, CDCl<sub>3</sub>) δ 7.29 – 7.24 (m, 2H), 6.93 (t, *J* = 7.3 Hz, 1H), 6.85 (d, *J* = 8.0 Hz, 2H), 5.73 – 5.64 (m, 1H), 5.23 – 5.05 (m, 2H), 4.19 (qq, *J* = 10.8, 7.1 Hz, 4H), 4.04 (t, *J* = 6.4 Hz, 2H), 2.75 (d, *J* = 7.4 Hz, 2H), 2.41 (t, *J* = 6.4 Hz, 2H), 1.23 (t, *J* = 7.1 Hz, 6H). <sup>13</sup>C NMR (126 MHz, CDCl<sub>3</sub>) δ 171.08, 158.67, 132.45, 129.56, 120.92, 119.49, 114.49, 63.76, 61.54, 55.81, 37.65, 31.99, 14.17. ESI (m/z): [M+Na]<sup>+</sup> calcd. for C<sub>18</sub>H<sub>24</sub>NaO<sub>5</sub>: 343.1516, found: 343.1520.

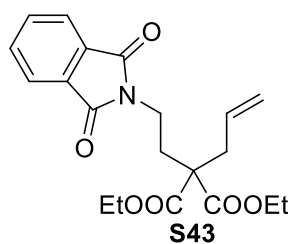

Prepared according to general procedure A and obtained as colorless oil. <sup>1</sup>H NMR (500 MHz, CDCl<sub>3</sub>) δ 7.84 (dd, *J* = 5.4, 3.1 Hz, 2H), 7.71 (dd, *J* = 5.4, 3.0 Hz, 1H), 5.72 (ddt, *J* = 17.4, 10.1, 7.4 Hz, 1H), 5.23 (dd, *J* = 17.0, 1.5 Hz, 2H), 5.17 (dd, *J* = 10.1, 1.4 Hz, 2H), 4.19 (2\*q, *J* = 7.1 Hz, 4H), 3.79 – 3.65 (m, 2H), 2.76 (d, *J* = 7.4 Hz, 2H), 2.30 – 2.21 (m, 2H), 1.28 (t, *J* = 7.1 Hz, 6H). <sup>13</sup>C NMR (126 MHz, CDCl<sub>3</sub>) δ 170.65, 168.05, 134.10, 132.27, 131.98, 123.34, 119.89, 61.73, 56.14, 37.01, 33.68, 30.66, 14.20. ESI (m/z): [M+Na]<sup>+</sup> calcd. for C<sub>20</sub>H<sub>23</sub>NaO<sub>6</sub>: 396.1418, found: 396.1425.

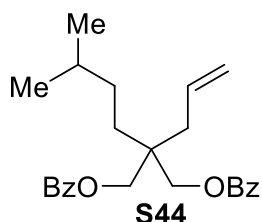

Prepared according to general procedure A and obtained as colorless oil. <sup>1</sup>H NMR (400 MHz, CDCl<sub>3</sub>) δ 8.02 (d, *J* = 7.2 Hz, 4H), 7.56 (t, *J* = 7.4 Hz, 2H), 7.43 (t, *J* = 7.7 Hz, 4H), 5.93 – 5.77 (m, 1H), 5.20 – 5.07 (m, 2H), 4.30 (s, 4H), 2.31 (d, *J* = 7.5 Hz, 2H), 1.57 – 1.45 (m, 3H), 1.36 – 1.19 (m, 2H), 0.89 (d, *J* = 6.6 Hz, 6H). <sup>13</sup>C NMR (101 MHz, CDCl<sub>3</sub>) δ 166.48, 133.17, 132.67, 130.20, 129.68, 128.58, 119.20, 66.94, 40.46, 36.54, 31.78, 29.61, 28.76, 22.71. HRMS ESI (m/z): [M+Na]<sup>+</sup> calcd. for C<sub>25</sub>H<sub>30</sub>NaO<sub>4</sub>: 417.2042, found: 417.2043.

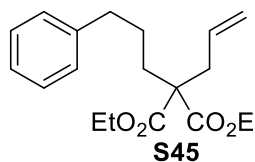

Prepared according to general procedure A and obtained as colorless oil. <sup>1</sup>H NMR (400 MHz, CDCl<sub>3</sub>) δ 7.29 – 7.24 (m, 2H), 7.20 – 7.13 (m, 3H), 5.66 – 5.53 (m, 1H), 5.10 – 5.01 (m, 2H), 4.15 (q, *J* = 7.1 Hz, 4H), 2.66 – 2.58 (m, 4H), 1.95 – 1.87 (m, 2H), 1.58 – 1.48 (m, 2H), 1.21 (t, *J* = 7.1 Hz, 6H). <sup>13</sup>C NMR (101 MHz, CDCl<sub>3</sub>) δ 171.36, 141.92, 132.54, 128.48, 128.43, 125.96, 118.99, 61.28, 57.39, 36.94, 36.04, 31.74, 25.78, 14.23. HRMS ESI (m/z): [M+Na]<sup>+</sup> calcd. for C<sub>19</sub>H<sub>26</sub>NaO<sub>4</sub>: 341.1729, found: 341.1725.

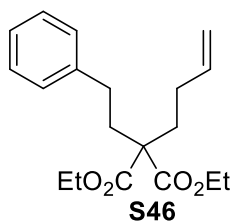

Prepared according to general procedure A and obtained as colorless oil.  $^1\text{H}$  NMR (400 MHz,  $\text{CDCl}_3$ )  $\delta$  7.35-7.26 (m,  $J$  = 6.4 Hz, 3H), 7.22-7.16 (m, 2H), 5.93 – 5.70 (m, 1H), 5.07-4.93 (m, 2H), 4.20 (q,  $J$  = 7.1 Hz, 4H), 2.64 – 2.47 (m, 2H), 2.27-2.17 (m, 2H), 2.17 – 1.92 (m, 4H), 1.27 (t,  $J$  = 7.0 Hz, 6H).  $^{13}\text{C}$  NMR (101 MHz,  $\text{CDCl}_3$ ) 171.58, 141.56, 137.69, 128.57, 128.48, 126.19, 115.24, 61.34, 57.40, 34.55, 32.00, 30.78, 28.59, 14.28. HRMS ESI ( $m/z$ ):  $[\text{M}+\text{Na}]^+$  calcd. for  $\text{C}_{19}\text{H}_{26}\text{NaO}_4$ : 341.1729, found: 341.1725.

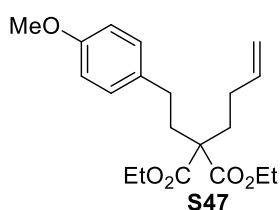

Prepared according to general procedure A and obtained as colorless oil.  $^1\text{H}$  NMR (400 MHz,  $\text{CDCl}_3$ )  $\delta$  7.09 (d,  $J$  = 8.6 Hz, 2H), 6.83 (d,  $J$  = 8.6 Hz, 2H), 5.87 – 5.74 (m, 1H), 5.04 (dd,  $J$  = 17.1, 1.5 Hz, 1H), 5.01 – 4.94 (m, 1H), 4.20 (q,  $J$  = 7.1 Hz, 4H), 3.79 (s, 3H), 2.50 – 2.41 (m, 2H), 2.21 – 2.13 (m, 2H), 2.10 – 1.93 (m, 4H), 1.27 (t,  $J$  = 7.1 Hz, 6H).  $^{13}\text{C}$  NMR (101 MHz,  $\text{CDCl}_3$ )  $\delta$  171.62, 158.06, 137.72, 133.62, 129.37, 115.22, 113.98, 61.32, 57.37, 55.43, 34.78, 31.99, 29.84, 28.59, 14.28. HRMS ESI ( $m/z$ ):  $[\text{M}+\text{Na}]^+$  calcd. for  $\text{C}_{20}\text{H}_{28}\text{NaO}_5$ : 371.1834, found: 371.1828.

### General procedure B for remote azidotrifluoromethylation

Fe salt (0.01 mmol, 10 mol %), Togni-II (0.125 mmol, 1.25 equiv) were combined in a 25 mL oven-dried sealed tube. The vessel was evacuated and backfilled with  $\text{N}_2$  (repeated for 3 times), after that, alkenes (0.1 mmol),  $\text{TMSN}_3$  (0.3 mmol, 3.0 equiv) and DCM (1.0 mL) were then added via syringe under  $\text{N}_2$ . The tube was sealed with a Teflon lined cap and moved into a preheated oil bath at 50  $^\circ\text{C}$  for 12 h. The reaction mixture was then cooled to room temperature, diluted with EtOAc (10 mL) and filtered through a pad of celite. The filtrate was concentrated, and the residue was then purified by flash column chromatography to give the difunctional products.

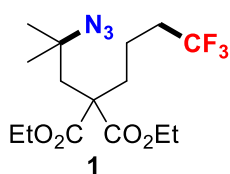

Prepared according to General Procedure B and obtained as colorless oil.  $^1\text{H}$  NMR (400 MHz,  $\text{CDCl}_3$ )  $\delta$  4.29 – 4.11 (m, 4H), 2.22 (s, 2H), 2.18 – 2.00 (m, 4H), 1.56 – 1.40 (m, 2H), 1.32 (s, 6H), 1.26 (t,  $J$  = 7.1 Hz, 6H).  $^{19}\text{F}$  NMR (376 MHz,  $\text{CDCl}_3$ )  $\delta$  -66.38 (t,  $J$  = 10.6 Hz, 3F).  $^{13}\text{C}$  NMR (101 MHz,  $\text{CDCl}_3$ )  $\delta$  171.24, 126.98 (q,  $J$  = 276.5 Hz), 61.70, 60.32, 56.34, 42.00, 33.98 (q,  $J$  = 28.8 Hz), 32.33, 27.27, 17.46 (q,  $J$  = 2.9 Hz), 14.05. HRMS ESI ( $m/z$ ):  $[\text{M}+\text{Na}]^+$  calcd. for  $\text{C}_{15}\text{H}_{24}\text{F}_3\text{N}_3\text{O}_4\text{Na}$ : 390.1617, found: 390.1611.

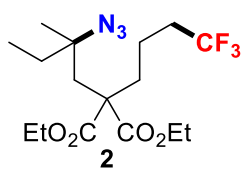

Prepared according to General Procedure B and obtained as colorless oil. <sup>1</sup>H NMR (400 MHz, CDCl<sub>3</sub>) δ 4.29 – 4.12 (m, 4H), 2.19 (s, 2H), 2.17 – 2.02 (m, 4H), 1.71 – 1.35 (m, 4H), 1.27 (t, *J* = 7.1 Hz, 3H), 1.26 (t, *J* = 7.1 Hz, 3H), 1.25 (s, 3H), 0.96 (t, *J* = 7.4 Hz, 3H). <sup>19</sup>F NMR (376 MHz, CDCl<sub>3</sub>) δ -66.38 (t, *J* = 10.8 Hz, 3F). <sup>13</sup>C NMR (101 MHz, CDCl<sub>3</sub>) δ 171.47, 171.17, 126.98 (q, *J* = 276.3 Hz), 63.04, 61.70, 56.27, 40.25, 34.80, 34.02 (q, *J* = 28.7 Hz), 32.51, 22.43, 17.53 (q, *J* = 3.0 Hz), 14.08, 14.05, 8.46. HRMS ESI (*m/z*): [M+Na]<sup>+</sup> calcd. for C<sub>16</sub>H<sub>26</sub>F<sub>3</sub>N<sub>3</sub>O<sub>4</sub>Na: 404.1773, found: 404.1770.

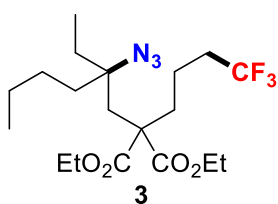

Prepared according to General Procedure B and obtained as colorless oil. <sup>1</sup>H NMR (500 MHz, CDCl<sub>3</sub>) δ 4.25 – 4.15 (m, 4H), 2.24 (s, 2H), 2.16 – 2.07 (m, 4H), 1.70 – 1.42 (m, 6H), 1.35 – 1.23 (m, 4H), 1.26 (t, *J* = 7.1 Hz, 6H), 0.93 (t, *J* = 6.7 Hz, 3H), 0.91 (t, *J* = 6.9 Hz, 3H). <sup>19</sup>F NMR (471 MHz, CDCl<sub>3</sub>) δ -66.40 (t, *J* = 10.5 Hz). <sup>13</sup>C NMR (126 MHz, CDCl<sub>3</sub>) δ 171.41, 171.39, 126.96 (q, *J* = 276.4 Hz), 65.48, 61.68, 56.24, 38.28, 36.22, 34.00 (q, *J* = 28.8 Hz), 32.39, 29.59, 25.83, 23.09, 17.61 (q, *J* = 3.2 Hz), 14.10, 14.05, 8.27. HRMS ESI (*m/z*): [M+Na]<sup>+</sup> calcd. for C<sub>19</sub>H<sub>32</sub>F<sub>3</sub>N<sub>3</sub>O<sub>4</sub>Na: 446.2243, found: 446.2256.

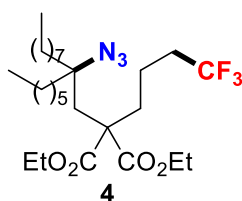

Prepared according to General Procedure B and obtained as colorless oil. <sup>1</sup>H NMR (400 MHz, CDCl<sub>3</sub>) δ 4.31 – 4.09 (m, 4H), 2.24 (s, 2H), 2.20 – 2.02 (m, 4H), 1.60 – 1.40 (m, 6H), 1.40 – 1.08 (m, 26H), 0.98 – 0.80 (m, 6H). <sup>19</sup>F NMR (376 MHz, CDCl<sub>3</sub>) δ -66.41 (t, *J* = 10.8 Hz, 3F). <sup>13</sup>C NMR (101 MHz, CDCl<sub>3</sub>) δ 171.37, 126.96 (q, *J* = 276.4 Hz), 65.30, 61.68, 56.33, 38.83, 37.16, 34.06 (q, *J* = 28.7 Hz), 32.43, 31.96, 31.83, 30.01, 29.68, 29.59, 29.37, 23.79, 23.78, 22.78, 22.74, 17.67 (q, *J* = 2.9 Hz), 14.22, 14.16, 14.07. HRMS ESI (*m/z*): [M+Na]<sup>+</sup> calcd. for C<sub>27</sub>H<sub>48</sub>F<sub>3</sub>N<sub>3</sub>O<sub>4</sub>Na: 558.3495, found: 558.3499.

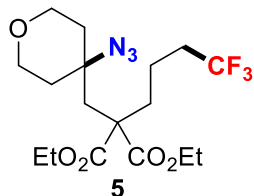

Prepared according to General Procedure B and obtained as colorless oil. <sup>1</sup>H NMR (400 MHz, CDCl<sub>3</sub>) δ 4.29 – 4.13 (m, 4H), 3.82 – 3.74 (m, 2H), 3.68 – 3.58 (m, 2H), 2.31 (s, 2H), 2.19 – 2.04 (m, 4H), 1.76 – 1.66 (m, 4H), 1.52 – 1.44 (m, 2H), 1.27 (t, *J* = 7.1 Hz, 6H). <sup>19</sup>F NMR (376 MHz, CDCl<sub>3</sub>) δ -66.34 (t, *J* = 10.7 Hz, 3F). <sup>13</sup>C NMR (101 MHz, CDCl<sub>3</sub>) δ 171.12, 126.89 (q, *J* = 276.5 Hz), 63.68, 61.93, 60.65, 55.85, 42.14, 35.45, 34.00 (q, *J* = 29.0 Hz), 33.19, 17.60 (q, *J* = 2.9 Hz), 14.08. HRMS ESI (*m/z*): [M+Na]<sup>+</sup> calcd. for C<sub>17</sub>H<sub>26</sub>F<sub>3</sub>N<sub>3</sub>O<sub>5</sub>Na: 432.1722, found: 432.1719.

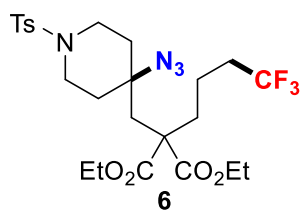

Prepared according to General Procedure B and obtained as colorless oil. <sup>1</sup>H NMR (500 MHz, CDCl<sub>3</sub>) δ 7.63 (d, *J* = 8.2 Hz, 2H), 7.35 (d, *J* = 8.1 Hz, 2H), 4.26 – 4.11 (m, 4H), 3.60 (d, *J* = 12.0 Hz, 2H), 2.50 – 2.37 (m, 2H), 2.45 (s, 3H), 2.27 (s, 2H), 2.14 – 2.05 (m, 4H), 1.85 – 1.66 (m, 4H), 1.47 – 1.38 (m, 2H), 1.25 (t, *J* = 7.1 Hz, 6H). <sup>19</sup>F NMR (471 MHz, CDCl<sub>3</sub>) δ -66.28 (t, *J* = 10.7 Hz). <sup>13</sup>C NMR (126 MHz, CDCl<sub>3</sub>) δ 170.84, 143.92, 132.73, 129.90, 127.67, 126.77 (q, *J* = 277.8 Hz), 61.91, 60.51, 55.61, 42.10, 41.40, 34.02, 33.80 (q, *J* = 29.1 Hz), 33.22, 21.62, 17.42 (q, *J* = 2.6 Hz), 13.95. HRMS ESI (*m/z*): [M+Na]<sup>+</sup> calcd. for C<sub>24</sub>H<sub>33</sub>F<sub>3</sub>N<sub>4</sub>O<sub>6</sub>Na: 585.1971, found: 585.1979.

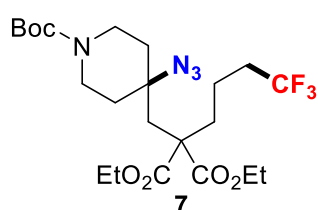

Prepared according to General Procedure B and obtained as colorless oil. <sup>1</sup>H NMR (400 MHz, CDCl<sub>3</sub>) δ 4.19 (q, *J* = 7.1 Hz, 4H), 4.07 (s, 2H), 2.66 (s, 2H), 2.13 – 2.02 (m, 2H), 1.99 – 1.83 (m, 4H), 1.67 (d, *J* = 12.5 Hz, 2H), 1.51 – 1.39 (m, 1H), 1.45 (s, 9H), 1.25 (t, *J* = 7.1 Hz, 6H), 1.16 – 0.96 (m, 3H). <sup>19</sup>F NMR (376 MHz, CDCl<sub>3</sub>) δ -66.33 (t, *J* = 10.8 Hz, 3F). <sup>13</sup>C NMR (101 MHz, CDCl<sub>3</sub>) δ 171.41, 154.96, 126.96 (q, *J* = 276.3 Hz), 79.39, 61.45, 57.29, 36.35, 34.02 (q, *J* = 28.7 Hz), 32.15, 31.49, 30.76, 29.74, 28.59, 17.13 (q, *J* = 2.9 Hz), 14.22. HRMS ESI (*m/z*): [M+Na]<sup>+</sup> calcd. for C<sub>22</sub>H<sub>35</sub>F<sub>3</sub>N<sub>4</sub>O<sub>6</sub>Na: 531.2407, found: 531.2404.

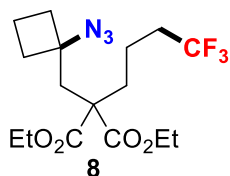

Prepared according to General Procedure B and obtained as colorless oil. <sup>1</sup>H NMR (400 MHz, CDCl<sub>3</sub>) δ 4.26 – 4.15 (m, 4H), 2.38 (s, 2H), 2.28 – 2.20 (m, 2H), 2.15 – 2.02 (m, 4H), 2.02 – 1.94 (m, 3H), 1.91 – 1.81 (m, 1H), 1.54 – 1.42 (m, 2H), 1.27 (d, *J* = 7.1 Hz, 6H). <sup>19</sup>F NMR (376 MHz, CDCl<sub>3</sub>) δ -66.39 (t, *J* = 10.8 Hz, 3F). <sup>13</sup>C NMR (101 MHz, CDCl<sub>3</sub>) δ 171.13, 126.93 (q, *J* = 276.3 Hz), 64.29, 61.72, 56.27, 40.36, 34.01 (q, *J* = 28.7 Hz), 33.41, 31.95, 17.63 (q, *J* = 3.0 Hz), 15.06, 14.07. HRMS ESI (*m/z*): [M+Na]<sup>+</sup> calcd. for C<sub>16</sub>H<sub>24</sub>F<sub>3</sub>N<sub>3</sub>O<sub>4</sub>Na: 402.1617, found: 402.1613.

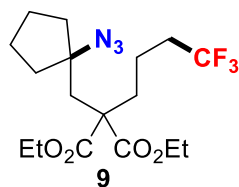

Prepared according to General Procedure B and obtained as colorless oil. <sup>1</sup>H NMR (400 MHz, CDCl<sub>3</sub>) δ 4.32 – 4.10 (m, 4H), 2.41 (s, 2H), 2.19 – 2.03 (m, 4H), 1.96 – 1.87 (m, 2H), 1.78 – 1.69 (m, 4H), 1.60 – 1.52 (m, 2H), 1.50 – 1.42 (m, 2H), 1.27 (t, *J* = 7.1 Hz, 6H). <sup>19</sup>F NMR (376 MHz, CDCl<sub>3</sub>) δ -66.40 (t, *J* = 10.8 Hz, 3F). <sup>13</sup>C NMR (101 MHz, CDCl<sub>3</sub>) δ 171.30, 126.93 (q, *J* = 276.4 Hz), 71.62, 61.72, 56.60, 40.54, 38.03, 34.02 (q, *J* = 28.8 Hz), 32.34, 23.04, 17.62 (q, *J* = 3.0 Hz), 14.06. HRMS ESI (*m/z*): [M+Na]<sup>+</sup> calcd. for C<sub>17</sub>H<sub>26</sub>F<sub>3</sub>N<sub>3</sub>O<sub>4</sub>Na: 416.1773, found: 416.1768.

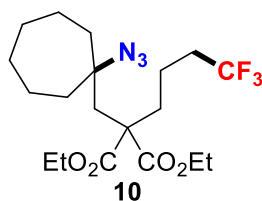

Prepared according to General Procedure B and obtained as colorless oil.  $^1\text{H}$  NMR (400 MHz,  $\text{CDCl}_3$ )  $\delta$  4.28 – 4.12 (m, 4H), 2.27 (s, 2H), 2.19 – 2.04 (m, 4H), 1.86 (dd,  $J = 13.5, 9.0$  Hz, 2H), 1.66 – 1.41 (m, 12H), 1.26 (t,  $J = 7.1$  Hz, 6H).  $^{19}\text{F}$  NMR (376 MHz,  $\text{CDCl}_3$ )  $\delta$  -66.38 (t,  $J = 10.8$  Hz, 3F).  $^{13}\text{C}$  NMR (101 MHz,  $\text{CDCl}_3$ )  $\delta$  171.36, 126.97 (q,  $J = 276.3$  Hz), 66.60, 61.71, 56.31, 41.83, 38.97, 34.04 (q,  $J = 28.8$  Hz), 32.69, 30.08, 22.52, 17.57 (q,  $J = 3.0$  Hz), 14.09. HRMS ESI ( $m/z$ ):  $[\text{M}+\text{Na}]^+$  calcd. for  $\text{C}_{19}\text{H}_{30}\text{F}_3\text{N}_3\text{O}_4\text{Na}$ : 444.2086, found: 444.2086.

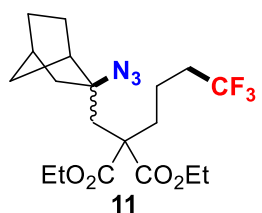

Prepared according to General Procedure B and obtained as colorless oil.  $^1\text{H}$  NMR (500 MHz,  $\text{CDCl}_3$ )  $\delta$  4.30 – 4.14 (m, 4H), 2.47 (d,  $J = 15.2$  Hz, 1H), 2.38 (d,  $J = 15.2$  Hz, 1H), 2.33 – 2.25 (m, 2H), 2.18 – 2.02 (m, 3H), 2.02 – 1.93 (m, 1H), 1.85 – 1.77 (m, 1H), 1.70 (d,  $J = 10.2$  Hz, 1H), 1.61 – 1.43 (m, 5H), 1.30 – 1.12 (m, 3H), 1.27 (td,  $J = 7.1, 2.9$  Hz, 6H).  $^{19}\text{F}$  NMR (471 MHz,  $\text{CDCl}_3$ )  $\delta$  -66.35 (t,  $J = 10.8$  Hz).  $^{13}\text{C}$  NMR (126 MHz,  $\text{CDCl}_3$ )  $\delta$  171.44, 171.38, 126.92 (q,  $J = 276.6$  Hz), 69.65, 61.76, 56.79, 47.42, 44.34, 39.28, 37.53, 36.45, 34.02 (q,  $J = 28.8$  Hz), 32.26, 28.84, 23.20, 17.88 (q,  $J = 3.3$  Hz), 14.09. HRMS ESI ( $m/z$ ):  $[\text{M}+\text{Na}]^+$  calcd. for  $\text{C}_{19}\text{H}_{28}\text{F}_3\text{N}_3\text{O}_4\text{Na}$ : 442.1930, found: 442.1941.

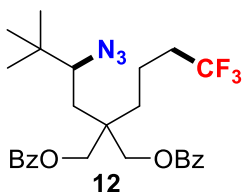

Prepared according to General Procedure B and obtained as colorless oil.  $^1\text{H}$  NMR (400 MHz,  $\text{CDCl}_3$ )  $\delta$  8.01 (d,  $J = 8.3$  Hz, 4H), 7.56 (t,  $J = 7.4$  Hz, 2H), 7.43 (t,  $J = 7.6$  Hz, 4H), 4.30 (s, 4H), 2.17 – 2.01 (m, 2H), 1.72 – 1.61 (m, 2H), 1.57 – 1.53 (m, 1H), 1.53 – 1.46 (m, 2H), 1.28 – 1.18 (m, 2H), 0.88 (s, 9H).  $^{19}\text{F}$  NMR (376 MHz,  $\text{CDCl}_3$ )  $\delta$  -66.14 (t,  $J = 10.8$  Hz, 3F).  $^{13}\text{C}$  NMR (101 MHz,  $\text{CDCl}_3$ )  $\delta$  166.44, 133.26, 130.05, 129.65, 128.61, 127.08 (q,  $J = 277.6$  Hz), 66.68, 40.05, 36.34, 34.44 (q,  $J = 28.7$  Hz), 30.97, 30.29, 29.33, 25.98, 15.90 (q,  $J = 2.7$  Hz). HRMS ESI ( $m/z$ ):  $[\text{M}+\text{H}]^+$  calcd. for  $\text{C}_{27}\text{H}_{33}\text{N}_3\text{O}_4\text{F}_3$ : 520.2423, found: 520.2417.

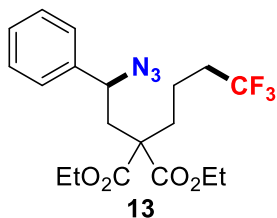

Prepared according to General Procedure B and obtained as colorless oil.  $^1\text{H}$  NMR (400 MHz,  $\text{CDCl}_3$ )  $\delta$  7.45 – 7.30 (m, 5H), 4.52 (dd,  $J = 8.8, 4.6$  Hz, 1H), 4.27 – 4.11 (m, 4H), 2.44 – 2.30 (m, 2H), 2.14 – 1.93 (m, 4H), 1.57 – 1.43 (m, 1H), 1.43 – 1.32 (m, 1H), 1.28 (t,  $J = 7.1$  Hz, 3H), 1.24 (t,  $J = 7.3$  Hz, 3H).  $^{19}\text{F}$  NMR (376 MHz,  $\text{CDCl}_3$ )  $\delta$  -66.30 (t,  $J = 10.8$  Hz, 3F).  $^{13}\text{C}$  NMR (101 MHz,  $\text{CDCl}_3$ )  $\delta$  170.84, 170.74, 139.57, 129.09, 128.74, 126.97, 126.90 (q,  $J = 276.4$  Hz), 62.63, 61.84, 61.77, 56.22, 38.98, 33.91 (q,  $J = 29.1$  Hz), 32.09, 17.21 (q,  $J = 2.9$  Hz), 14.12, 14.10.

HRMS ESI (*m/z*): [M+Na]<sup>+</sup> calcd. for C<sub>19</sub>H<sub>24</sub>F<sub>3</sub>N<sub>3</sub>NaO<sub>4</sub>: 438.1617, found: 438.1617.

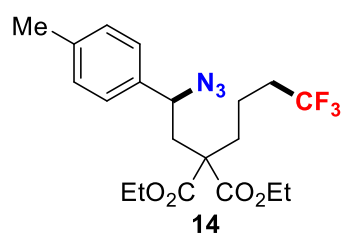

Prepared according to General Procedure B and obtained as colorless oil. <sup>1</sup>H NMR (400 MHz, CDCl<sub>3</sub>) δ 7.21 (s, 4H), 4.47 (dd, *J* = 9.1, 4.3 Hz, 1H), 4.27 – 4.07 (m, 4H), 2.40 – 2.29 (m, 2H), 2.36 (s, 3H), 2.13 – 1.95 (m, 4H), 1.54 – 1.43 (m, 1H), 1.41 – 1.33 (m, 1H), 1.28 (t, *J* = 7.0 Hz, 3H), 1.24

(t, *J* = 7.1 Hz, 3H). <sup>19</sup>F NMR (376 MHz, CDCl<sub>3</sub>) δ -66.31 (t, *J* = 10.8 Hz, 3F). <sup>13</sup>C NMR (101 MHz, CDCl<sub>3</sub>) δ 170.88, 170.78, 138.60, 136.49, 129.71, 126.91, 126.89 (q, *J* = 276.6 Hz), 62.36, 61.82, 61.75, 56.21, 38.86, 33.91 (q, *J* = 28.9 Hz), 32.01, 21.28, 17.19 (q, *J* = 2.9 Hz), 14.13, 14.10. HRMS ESI (*m/z*): [M+Na]<sup>+</sup> calcd. for C<sub>20</sub>H<sub>26</sub>F<sub>3</sub>N<sub>3</sub>NaO<sub>4</sub>: 452.1773, found: 452.1773.

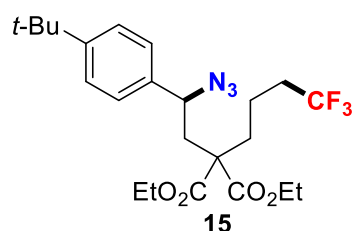

Prepared according to General Procedure B and obtained as colorless oil. <sup>1</sup>H NMR (400 MHz, CDCl<sub>3</sub>) δ 7.40 (d, *J* = 8.3 Hz, 2H), 7.25 (d, *J* = 8.4 Hz, 2H), 4.47 (dd, *J* = 8.5, 4.9 Hz, 1H), 4.25 – 4.08 (m, 4H), 2.44 – 2.30 (m, 2H), 2.13 – 1.92 (m, 4H), 1.52 – 1.35 (m, 2H), 1.32 (s, 9H),

1.28 (t, *J* = 7.1 Hz, 3H), 1.24 (t, *J* = 7.1 Hz, 3H). <sup>19</sup>F NMR (376 MHz, CDCl<sub>3</sub>) δ -66.31 (t, *J* = 10.8 Hz, 3F). <sup>13</sup>C NMR (101 MHz, CDCl<sub>3</sub>) δ = 170.89, 170.77, 151.74, 136.48, 126.88 (q, *J* = 276.5 Hz), 126.71, 125.96, 62.32, 61.82, 61.76, 56.21, 38.77, 34.76, 33.92 (q, *J* = 28.9 Hz), 31.98, 31.39, 17.18, 17.15, 14.14, 14.12. HRMS ESI (*m/z*): [M+Na]<sup>+</sup> calcd. for C<sub>23</sub>H<sub>32</sub>F<sub>3</sub>N<sub>3</sub>NaO<sub>4</sub>: 494.2243 found: 494.2243.

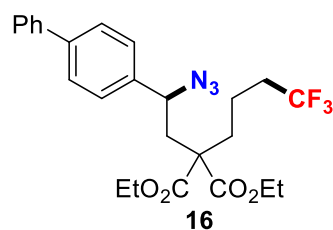

Prepared according to General Procedure B and obtained as colorless oil. <sup>1</sup>H NMR (400 MHz, CDCl<sub>3</sub>) δ 7.60 (dd, *J* = 12.3, 8.0 Hz, 4H), 7.46 (t, *J* = 7.6 Hz, 2H), 7.38 (dd, *J* = 16.4, 7.4 Hz, 3H), 4.58 (dd, *J* = 8.4, 4.8 Hz, 1H), 4.28 – 4.09 (m, 4H), 2.50 – 2.29 (m, 2H), 2.19 – 1.95 (m, 4H),

1.60 – 1.47 (m, 1H), 1.46 – 1.34 (m, 1H), 1.29 (d, *J* = 7.1 Hz, 3H), 1.26 (t, *J* = 7.1 Hz, 3H). <sup>19</sup>F NMR (376 MHz, CDCl<sub>3</sub>) δ -66.26 (t, *J* = 10.7 Hz, 3F). <sup>13</sup>C NMR (101 MHz, CDCl<sub>3</sub>) δ 170.88, 170.77, 141.70, 140.51, 138.54, 128.98, 127.81, 127.71, 127.43, 127.24, 126.90 (q, *J* = 276.5 Hz), 62.38, 61.90, 61.82, 56.23, 39.05, 33.94 (q, *J* = 28.9 Hz), 32.17, 17.25 (q, *J* = 2.9 Hz), 14.16, 14.14. HRMS ESI (*m/z*): [M+Na]<sup>+</sup> calcd. for C<sub>25</sub>H<sub>28</sub>F<sub>3</sub>N<sub>3</sub>NaO<sub>4</sub>: 514.1930, found: 514.1930.

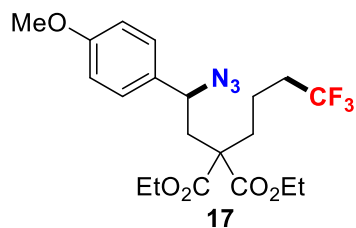

Prepared according to General Procedure B and obtained as colorless oil.  $^1\text{H}$  NMR (400 MHz,  $\text{CDCl}_3$ )  $\delta$  7.25 (d,  $J = 9.3$  Hz, 2H), 6.91 (d,  $J = 7.7$  Hz, 2H), 4.46 (dd,  $J = 8.9$ , 4.1 Hz, 1H), 4.33 – 4.04 (m, 4H), 3.82 (s, 3H), 2.49 – 2.28 (m, 2H), 2.23 – 1.90 (m, 4H), 1.51 – 1.45 (m, 1H), 1.39 – 1.35 (m, 1H), 1.31 – 1.19 (m, 6H).  $^{19}\text{F}$  NMR (376 MHz,  $\text{CDCl}_3$ )  $\delta$  -66.28 (t,  $J = 10.7$  Hz).  $^{13}\text{C}$  NMR (101 MHz,  $\text{CDCl}_3$ )  $\delta$  170.89, 170.78, 159.83, 131.49, 128.31, 126.90 (q,  $J = 277.4$  Hz), 114.35, 62.09, 61.84, 61.77, 56.19, 55.47, 38.82, 33.93 (q,  $J = 28.8$  Hz), 31.98, 17.21 (q,  $J = 3.0$  Hz), 14.14, 14.12. HRMS ESI ( $m/z$ ):  $[\text{M}+\text{Na}]^+$  calcd. for  $\text{C}_{20}\text{H}_{26}\text{F}_3\text{N}_3\text{NaO}_5$ : 468.1722, found: 468.1722.

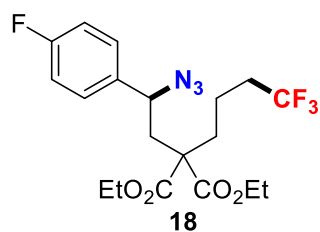

Prepared according to General Procedure B and obtained as colorless oil.  $^1\text{H}$  NMR (400 MHz,  $\text{CDCl}_3$ )  $\delta$  7.31 (dd,  $J = 8.7$ , 5.2 Hz, 2H), 7.09 (t,  $J = 8.6$  Hz, 2H), 4.53 (dd,  $J = 8.9$ , 4.5 Hz, 1H), 4.25 – 4.11 (m, 4H), 2.36 – 2.25 (m, 2H), 2.14 – 1.99 (m, 4H), 1.56 – 1.47 (m, 1H), 1.41 – 1.32 (m, 1H), 1.28 (t,  $J = 7.1$  Hz, 3H), 1.25 (t,  $J = 7.1$  Hz, 3H).  $^{19}\text{F}$  NMR (376 MHz,  $\text{CDCl}_3$ )  $\delta$  -66.27 (t,  $J = 11.0$  Hz, 3F), -113.00 (tt,  $J = 8.8$ , 5.4 Hz, 1F).  $^{13}\text{C}$  NMR (101 MHz,  $\text{CDCl}_3$ )  $\delta$  170.80, 170.70, 162.76 (d,  $J = 247.7$  Hz), 135.49 (d,  $J = 3.3$  Hz), 128.72 (d,  $J = 8.2$  Hz), 126.88 (q,  $J = 276.5$  Hz), 116.05 (d,  $J = 21.6$  Hz), 61.94, 61.92, 61.83, 56.15, 39.21, 33.90 (q,  $J = 28.9$  Hz), 32.20, 17.23 (q,  $J = 2.9$  Hz), 14.13, 14.12. HRMS ESI ( $m/z$ ):  $[\text{M}+\text{Na}]^+$  calcd. for  $\text{C}_{19}\text{H}_{23}\text{F}_4\text{N}_3\text{NaO}_4$ : 456.1522, found: 456.1522.

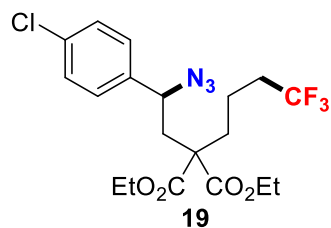

Prepared according to General Procedure B and obtained as colorless oil.  $^1\text{H}$  NMR (400 MHz,  $\text{CDCl}_3$ )  $\delta$  7.37 (d,  $J = 8.5$  Hz, 2H), 7.27 (d,  $J = 8.4$  Hz, 2H), 4.53 (dd,  $J = 8.5$ , 4.8 Hz, 1H), 4.29 – 4.08 (m, 4H), 2.35 – 2.24 (m, 2H), 2.18 – 1.95 (m, 4H), 1.59 – 1.45 (m, 1H), 1.42 – 1.33 (m, 1H), 1.28 (t,  $J = 7.1$  Hz, 3H), 1.26 (t,  $J = 7.1$  Hz, 3H).  $^{19}\text{F}$  NMR (376 MHz,  $\text{CDCl}_3$ )  $\delta$  -66.26 (t,  $J = 10.7$  Hz, 3F).  $^{13}\text{C}$  NMR (101 MHz,  $\text{CDCl}_3$ )  $\delta$  170.78, 170.67, 138.21, 134.55, 129.30, 128.30, 126.88 (q,  $J = 276.0$  Hz), 62.01, 61.95, 61.84, 56.16, 39.24, 33.90 (q,  $J = 28.9$  Hz), 32.29, 17.24 (q,  $J = 2.9$  Hz), 14.12, 14.11. HRMS ESI ( $m/z$ ):  $[\text{M}+\text{Na}]^+$  calcd. for  $\text{C}_{19}\text{H}_{23}\text{ClF}_3\text{N}_3\text{NaO}_4$ : 472.1227, found: 472.1227.

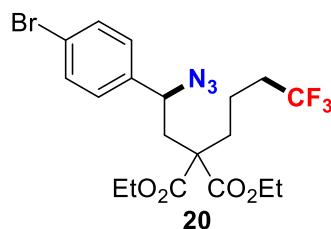

Prepared according to General Procedure B and obtained as colorless oil.  $^1\text{H}$  NMR (400 MHz,  $\text{CDCl}_3$ )  $\delta$  7.53 (d,  $J = 8.4$  Hz, 2H), 7.21 (d,  $J = 8.4$  Hz, 2H), 4.52 (dd,  $J = 8.3$ , 4.9 Hz, 1H), 4.27 – 4.08 (m, 4H), 2.35 – 2.23 (m, 2H), 2.21 –



1.94 (m, 4H), 1.58 – 1.44 (m, 1H), 1.44 – 1.31 (m, 1H), 1.28 (t,  $J = 7.1$  Hz, 3H), 1.26 (t,  $J = 7.1$  Hz, 3H).  $^{19}\text{F}$  NMR (376 MHz,  $\text{CDCl}_3$ )  $\delta$  -66.26 (t,  $J = 10.8$  Hz, 3F).  $^{13}\text{C}$  NMR (101 MHz,  $\text{CDCl}_3$ )  $\delta$  190.19, 170.76, 170.66, 138.75, 132.26, 128.60, 126.87 (q,  $J = 276.4$  Hz), 122.66, 62.07, 61.95, 61.84, 56.15, 39.22, 33.89 (q,  $J = 28.9$  Hz), 32.31, 17.23 (q,  $J = 2.9$  Hz), 14.12, 14.11. HRMS ESI ( $m/z$ ):  $[\text{M}+\text{Na}]^+$  calcd. for  $\text{C}_{19}\text{H}_{23}\text{BrF}_3\text{N}_3\text{NaO}_4$ : 516.0722, found: 516.0722.

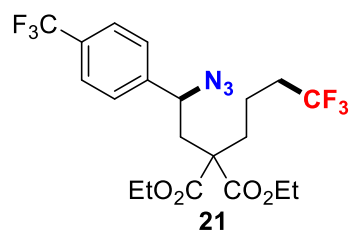

Prepared according to General Procedure B and obtained as colorless oil.  $^1\text{H}$  NMR (400 MHz,  $\text{CDCl}_3$ )  $\delta$  7.67 (d,  $J = 8.1$  Hz, 2H), 7.47 (d,  $J = 8.1$  Hz, 2H), 4.65 (t,  $J = 6.6$  Hz, 1H), 4.29 – 4.06 (m, 4H), 2.29 (d,  $J = 6.6$  Hz, 2H), 2.17 – 1.97 (m, 4H), 1.61 – 1.47 (m, 1H), 1.43 – 1.33 (m, 1H),

1.29 (t,  $J = 7.1$  Hz, 3H), 1.27 (t,  $J = 7.1$  Hz, 3H).  $^{19}\text{F}$  NMR (376 MHz,  $\text{CDCl}_3$ )  $\delta$  -62.72 (s, 3F), -66.30 (t,  $J = 10.7$  Hz, 3F).  $^{13}\text{C}$  NMR (101 MHz,  $\text{CDCl}_3$ )  $\delta$  170.75, 170.63, 143.85, 130.88 (q,  $J = 32.6$  Hz), 127.29, 126.87 (q,  $J = 277.4$  Hz), 126.14 (q,  $J = 3.7$  Hz), 123.97 (q,  $J = 272.2$  Hz), 62.23, 62.01, 61.89, 56.18, 39.49, 33.88 (q,  $J = 28.8$  Hz), 32.48, 17.24 (q,  $J = 3.0$  Hz), 14.11, 14.09. HRMS ESI ( $m/z$ ):  $[\text{M}+\text{Na}]^+$  calcd. for  $\text{C}_{20}\text{H}_{23}\text{F}_6\text{N}_3\text{NaO}_4$ : 506.1490, found: 506.1490.

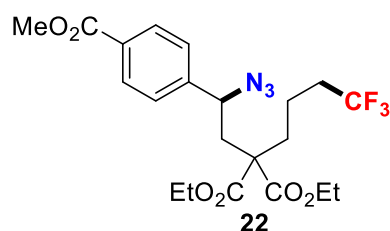

Prepared according to General Procedure B and obtained as colorless oil.  $^1\text{H}$  NMR (400 MHz,  $\text{CDCl}_3$ )  $\delta$  8.07 (d,  $J = 8.2$  Hz, 2H), 7.41 (d,  $J = 8.3$  Hz, 2H), 4.62 (dd,  $J = 7.7, 5.5$  Hz, 1H), 4.30 – 4.11 (m, 4H), 3.93 (s, 3H), 2.37 – 2.27 (m, 2H), 2.17 – 1.96 (m, 4H),

1.61 – 1.50 (m, 1H), 1.44 – 1.34 (m, 1H), 1.29 (t,  $J = 7.1$  Hz, 3H), 1.26 (t,  $J = 7.1$  Hz, 3H).  $^{19}\text{F}$  NMR (376 MHz,  $\text{CDCl}_3$ )  $\delta$  -66.27 (t,  $J = 10.7$  Hz).  $^{13}\text{C}$  NMR (101 MHz,  $\text{CDCl}_3$ )  $\delta$  170.75, 170.65, 166.61, 144.66, 130.48, 130.43, 126.92, 126.88 (q,  $J = 277.5$  Hz), 62.34, 61.96, 61.85, 56.19, 52.38, 39.26, 33.90 (q,  $J = 28.8$  Hz), 32.38, 17.25 (q,  $J = 3.0$  Hz), 14.11, 14.10. HRMS ESI ( $m/z$ ):  $[\text{M}+\text{Na}]^+$  calcd. for  $\text{C}_{21}\text{H}_{26}\text{F}_3\text{N}_3\text{NaO}_6$ : 496.1671, found: 496.1668.

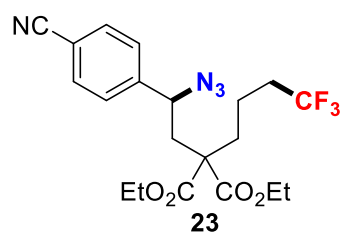

Prepared according to General Procedure B and obtained as colorless oil.  $^1\text{H}$  NMR (400 MHz,  $\text{CDCl}_3$ )  $\delta$  7.71 (d,  $J = 8.4$  Hz, 2H), 7.47 (d,  $J = 8.3$  Hz, 2H), 4.67 (dd,  $J = 8.6, 4.4$  Hz, 1H), 4.28 – 4.10 (m, 4H), 2.29 – 2.20 (m, 2H), 2.16 – 2.01 (m, 4H), 1.58 – 1.48 (m, 1H), 1.43 – 1.33 (m, 1H),

1.29 (t,  $J = 7.1$  Hz, 3H), 1.28 (t,  $J = 7.1$  Hz, 3H).  $^{19}\text{F}$  NMR (376 MHz,  $\text{CDCl}_3$ )  $\delta$  -66.24 (t,  $J = 10.7$  Hz).  $^{13}\text{C}$  NMR (101 MHz,  $\text{CDCl}_3$ )  $\delta$  170.70, 170.56, 145.22, 132.98, 127.61,



126.86 (q,  $J = 277.6$  Hz), 118.42, 112.62, 62.31, 62.08, 61.94, 56.18, 39.67, 33.88 (q,  $J = 28.9$  Hz), 32.67, 17.27 (q,  $J = 2.9$  Hz), 14.12. HRMS ESI ( $m/z$ ):  $[M+Na]^+$  calcd. for  $C_{20}H_{23}F_3N_4NaO_4$ : 463.1569, found: 463.1566.

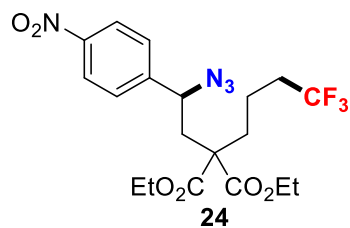

Prepared according to General Procedure B and obtained as colorless oil.  $^1H$  NMR (400 MHz,  $CDCl_3$ )  $\delta$  8.27 (d,  $J = 8.7$  Hz, 2H), 7.54 (d,  $J = 8.7$  Hz, 2H), 4.74 (dd,  $J = 9.0$ , 3.9 Hz, 1H), 4.30 – 4.09 (m, 4H), 2.30 – 2.21 (m, 2H), 2.17 – 1.97 (m, 4H), 1.57 – 1.50 (m, 1H), 1.45 – 1.35 (m,

1H), 1.30 (t,  $J = 7.1$  Hz, 3H), 1.29 (t,  $J = 7.1$  Hz, 3H).  $^{19}F$  NMR (376 MHz,  $CDCl_3$ )  $\delta$  -66.23 (t,  $J = 10.7$  Hz, 3F).  $^{13}C$  NMR (101 MHz,  $CDCl_3$ )  $\delta$  170.72, 170.57, 147.97, 147.18, 127.76, 126.85 (q,  $J = 277.4$  Hz), 124.44, 62.13, 62.09, 61.98, 56.18, 39.81, 33.87 (q,  $J = 28.7$  Hz), 32.75, 17.28 (q,  $J = 3.1$  Hz), 14.14. HRMS ESI ( $m/z$ ):  $[M+Na]^+$  calcd. for  $C_{19}H_{23}F_3N_4NaO_6$ : 483.1467, found: 483.1467.

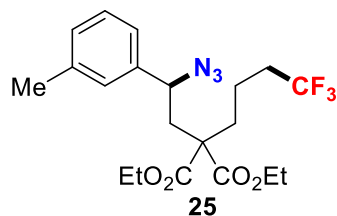

Prepared according to General Procedure B and obtained as colorless oil.  $^1H$  NMR (400 MHz,  $CDCl_3$ )  $\delta$  7.28 (s, 1H), 7.15 (d,  $J = 7.7$  Hz, 1H), 7.12 (s, 1H), 7.11 (d,  $J = 8.4$  Hz, 1H), 4.47 (dd,  $J = 9.0$ , 4.4 Hz, 1H), 4.30 – 4.06 (m, 4H), 2.42 – 2.27 (m, 5H), 2.14 – 1.93 (m, 4H), 1.55 – 1.47 (m,

1H), 1.42 – 1.34 (m, 1H), 1.29 (t,  $J = 7.2$  Hz, 3H), 1.25 (t,  $J = 7.2$  Hz, 3H).  $^{19}F$  NMR (376 MHz,  $CDCl_3$ )  $\delta$  -66.29 (t,  $J = 10.7$  Hz, 3F).  $^{13}C$  NMR (101 MHz,  $CDCl_3$ )  $\delta$  170.90, 170.80, 139.51, 138.88, 129.50, 128.96, 127.58, 126.90 (q,  $J = 277.5$  Hz), 124.04, 62.63, 61.86, 61.78, 56.23, 38.93, 33.93 (q,  $J = 28.9$  Hz), 32.07, 21.59, 17.21 (q,  $J = 2.9$  Hz), 14.15, 14.13. HRMS ESI ( $m/z$ ):  $[M+Na]^+$  calcd. for  $C_{20}H_{26}F_3N_3NaO_4$ : 452.1773, found: 452.1773.

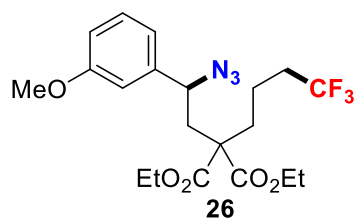

Prepared according to General Procedure B and obtained as colorless oil.  $^1H$  NMR (400 MHz,  $CDCl_3$ )  $\delta$  7.31 (t,  $J = 7.9$  Hz, 1H), 6.94 – 6.82 (m, 3H), 4.49 (dd,  $J = 8.4$ , 4.9 Hz, 1H), 4.28 – 4.11 (m, 4H), 3.83 (s, 3H), 2.39 – 2.27 (m, 2H), 2.14 – 1.98 (m, 4H), 1.56 – 1.47 (m, 1H), 1.42

– 1.33 (m, 1H), 1.29 (t,  $J = 7.1$  Hz, 3H), 1.25 (t,  $J = 7.1$  Hz, 3H).  $^{19}F$  NMR (376 MHz,  $CDCl_3$ )  $\delta$  -66.29 (t,  $J = 10.8$  Hz, 3F).  $^{13}C$  NMR (101 MHz,  $CDCl_3$ )  $\delta$  170.86, 170.78, 160.10, 141.18, 130.15, 126.90 (q,  $J = 276.3$  Hz), 119.19, 114.04, 112.52, 62.57, 61.88, 61.78, 56.20, 55.43, 39.01, 33.92 (q,  $J = 28.9$  Hz), 32.11, 17.22 (q,  $J = 2.9$  Hz), 14.14, 14.13. HRMS ESI ( $m/z$ ):  $[M+Na]^+$  calcd. for  $C_{20}H_{26}F_3N_3NaO_5$ : 468.1722, found: 468.1722.

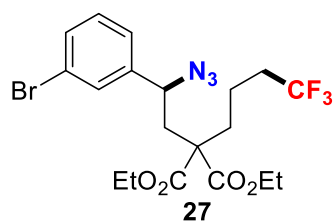

Prepared according to General Procedure B and obtained as colorless oil.  $^1\text{H}$  NMR (400 MHz,  $\text{CDCl}_3$ )  $\delta$  7.51 – 7.45 (m, 2H), 7.29 – 7.24 (m, 2H), 4.53 (t,  $J$  = 6.6 Hz, 1H), 4.26 – 4.10 (m, 4H), 2.28 (d,  $J$  = 6.7 Hz, 2H), 2.14 – 1.96 (m, 4H), 1.58 – 1.45 (m, 1H), 1.45 – 1.33 (m, 1H), 1.29 (t,  $J$  = 7.1 Hz, 3H), 1.27 (t,  $J$  = 7.1 Hz, 3H).  $^{19}\text{F}$  NMR (376 MHz,  $\text{CDCl}_3$ )  $\delta$  -66.24 (t,  $J$  = 10.7 Hz, 3F).  $^{13}\text{C}$  NMR (101 MHz,  $\text{CDCl}_3$ )  $\delta$  170.75, 170.65, 142.07, 131.84, 130.69, 129.95, 126.88 (q,  $J$  = 277.4 Hz), 125.58, 123.14, 62.13, 61.99, 61.87, 56.17, 39.35, 33.91 (q,  $J$  = 28.9 Hz), 32.39, 17.25 (q,  $J$  = 2.9 Hz), 14.14, 14.13. HRMS ESI ( $m/z$ ):  $[\text{M}+\text{Na}]^+$  calcd. for  $\text{C}_{19}\text{H}_{23}\text{BrF}_3\text{N}_3\text{NaO}_4$ : 516.0722, found: 516.0722.

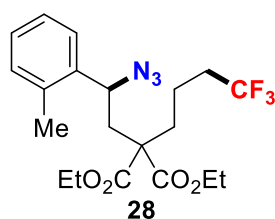

Prepared according to General Procedure B and obtained as colorless oil.  $^1\text{H}$  NMR (400 MHz,  $\text{CDCl}_3$ )  $\delta$  7.41 – 7.34 (m, 1H), 7.28 – 7.18 (m, 3H), 4.80 (dd,  $J$  = 9.8, 3.8 Hz, 1H), 4.26 – 4.08 (m, 4H), 2.40 (dd,  $J$  = 15.1, 9.8 Hz, 1H), 2.38 (s, 3H), 2.28 (dd,  $J$  = 15.0, 3.8 Hz, 1H), 2.20 – 1.95 (m, 4H), 1.57 – 1.49 (m, 1H), 1.43 – 1.31 (m, 1H), 1.28 (t,  $J$  = 7.1 Hz, 3H), 1.25 (t,  $J$  = 7.1 Hz, 3H).  $^{19}\text{F}$  NMR (376 MHz,  $\text{CDCl}_3$ )  $\delta$  -66.31 (t,  $J$  = 10.8 Hz, 3F).  $^{13}\text{C}$  NMR (101 MHz,  $\text{CDCl}_3$ )  $\delta$  170.93, 170.85, 137.62, 135.36, 131.10, 128.45, 126.91 (q,  $J$  = 277.4 Hz), 126.80, 126.72, 61.89, 61.78, 58.75, 56.28, 38.09, 33.96 (q,  $J$  = 28.8 Hz), 32.19, 19.36, 17.28 (q,  $J$  = 3.0 Hz), 14.15, 14.12. HRMS ESI ( $m/z$ ):  $[\text{M}+\text{Na}]^+$  calcd. for  $\text{C}_{20}\text{H}_{26}\text{F}_3\text{N}_3\text{NaO}_4$ : 452.1773, found: 452.1773.

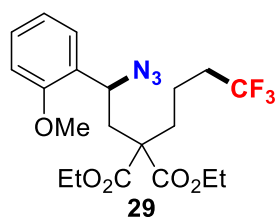

Prepared according to General Procedure B and obtained as colorless oil.  $^1\text{H}$  NMR (400 MHz,  $\text{CDCl}_3$ )  $\delta$  7.36 (d,  $J$  = 7.6 Hz, 1H), 7.30 (t,  $J$  = 7.8 Hz, 1H), 7.00 (t,  $J$  = 7.5 Hz, 1H), 6.90 (d,  $J$  = 8.2 Hz, 1H), 4.98 (dd,  $J$  = 10.0, 3.8 Hz, 1H), 4.31 – 4.19 (m, 2H), 4.19 – 4.08 (m, 2H), 3.83 (s, 3H), 2.42 – 2.25 (m, 2H), 2.22 – 2.01 (m, 4H), 1.63 – 1.51 (m, 1H), 1.48 – 1.36 (m, 1H), 1.29 (t,  $J$  = 7.1 Hz, 3H), 1.23 (t,  $J$  = 7.1 Hz, 3H).  $^{19}\text{F}$  NMR (376 MHz,  $\text{CDCl}_3$ )  $\delta$  -66.36 (t,  $J$  = 10.8 Hz, 3F).  $^{13}\text{C}$  NMR (101 MHz,  $\text{CDCl}_3$ )  $\delta$  171.04, 170.88, 156.12, 129.45, 127.86, 127.19, 126.97 (q,  $J$  = 276.1 Hz), 121.05, 110.69, 61.73, 61.66, 56.12, 56.03, 55.39, 37.25, 34.11 (q,  $J$  = 28.9 Hz), 30.95, 16.93 (q,  $J$  = 2.9 Hz), 14.10. HRMS ESI ( $m/z$ ):  $[\text{M}+\text{Na}]^+$  calcd. for  $\text{C}_{20}\text{H}_{26}\text{F}_3\text{N}_3\text{NaO}_5$ : 468.1722, found: 468.1722.

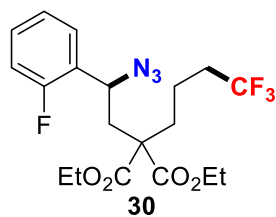

Prepared according to General Procedure B and obtained as colorless oil.  $^1\text{H}$  NMR (400 MHz,  $\text{CDCl}_3$ )  $\delta$  7.41 (td,  $J = 7.5$ , 1.7 Hz, 1H), 7.36 – 7.28 (m, 1H), 7.20 (td,  $J = 7.6$ , 1.1 Hz, 1H), 7.13 – 7.07 (m, 1H), 4.89 (dd,  $J = 9.7$ , 3.8 Hz, 1H), 4.27 – 4.08 (m, 4H), 2.42 (dd,  $J = 15.0$ , 9.7 Hz, 1H), 2.31 (dd,  $J = 15.1$ , 3.8 Hz, 1H), 2.21 – 1.99 (m, 4H), 1.58 – 1.38 (m, 2H), 1.28 (t,  $J = 7.1$  Hz, 3H), 1.24 (t,  $J = 7.1$  Hz, 3H).  $^{19}\text{F}$  NMR (376 MHz,  $\text{CDCl}_3$ )  $\delta$  -66.37 (t,  $J = 11.1$  Hz, 3F), -118.38 – -118.47 (m, 1F).  $^{13}\text{C}$  NMR (101 MHz,  $\text{CDCl}_3$ )  $\delta$  170.75, 170.67, 159.86 (d,  $J = 247.1$  Hz), 130.25 (d,  $J = 8.4$  Hz), 128.10 (d,  $J = 3.5$  Hz), 126.92 (q,  $J = 277.6$  Hz), 126.83 (d,  $J = 13.5$  Hz), 124.87 (d,  $J = 3.6$  Hz), 116.00 (d,  $J = 21.9$  Hz), 61.89, 61.80, 56.21, 55.81, 55.78, 37.91, 33.98 (q,  $J = 29.0$  Hz), 31.67, 17.13 (q,  $J = 2.9$  Hz), 14.10, 14.07. HRMS ESI ( $m/z$ ):  $[\text{M}+\text{Na}]^+$  calcd. for  $\text{C}_{19}\text{H}_{23}\text{F}_4\text{N}_3\text{NaO}_4$ : 456.1522, found: 456.1522.

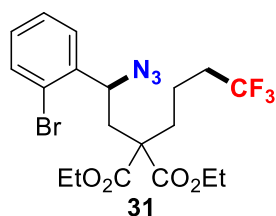

Prepared according to General Procedure B and obtained as colorless oil.  $^1\text{H}$  NMR (400 MHz,  $\text{CDCl}_3$ )  $\delta$  7.61 – 7.55 (m, 1H), 7.48 (dd,  $J = 7.8$ , 1.7 Hz, 1H), 7.43 – 7.35 (m, 1H), 7.20 (td,  $J = 7.9$ , 1.7 Hz, 1H), 5.08 (dd,  $J = 10.3$ , 3.3 Hz, 1H), 4.35 – 4.06 (m, 4H), 2.48 – 1.98 (m, 6H), 1.71 – 1.41 (m, 2H), 1.30 (t,  $J = 7.1$  Hz, 3H), 1.25 (t,  $J = 7.1$  Hz, 3H).  $^{19}\text{F}$  NMR (376 MHz,  $\text{CDCl}_3$ )  $\delta$  -66.29 (t,  $J = 10.7$  Hz, 3F).  $^{13}\text{C}$  NMR (101 MHz,  $\text{CDCl}_3$ )  $\delta$  170.78, 170.67, 139.11, 133.26, 130.05, 128.45, 128.40, 126.93 (q,  $J = 277.8$  Hz), 122.79, 61.92, 61.78, 61.12, 56.16, 37.97, 34.05 (q,  $J = 28.9$  Hz), 31.39, 17.28 (q,  $J = 2.9$  Hz), 14.13, 14.12. HRMS ESI ( $m/z$ ):  $[\text{M}+\text{Na}]^+$  calcd. for  $\text{C}_{19}\text{H}_{23}\text{BrF}_3\text{N}_3\text{NaO}_4$ : 516.0721, found: 516.0714.

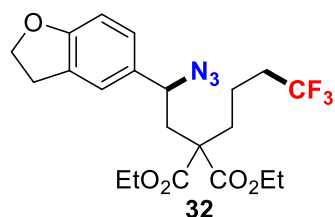

Prepared according to General Procedure B and obtained as colorless oil.  $^1\text{H}$  NMR (400 MHz,  $\text{CDCl}_3$ )  $\delta$  7.17 (s, 1H), 7.04 (d,  $J = 8.2$  Hz, 1H), 6.77 (d,  $J = 8.2$  Hz, 1H), 4.59 (t,  $J = 8.6$  Hz, 2H), 4.50 – 4.36 (m, 1H), 4.29 – 4.09 (m, 4H), 3.22 (t,  $J = 8.5$  Hz, 2H), 2.40 – 2.21 (m, 2H), 2.13 – 1.94 (m, 4H), 1.53 – 1.43 (m, 1H), 1.41 – 1.32 (m, 1H), 1.28 (t,  $J = 7.1$  Hz, 3H), 1.24 (t,  $J = 7.1$  Hz, 3H).  $^{19}\text{F}$  NMR (376 MHz,  $\text{CDCl}_3$ )  $\delta$  -66.30 (t,  $J = 10.3$  Hz).  $^{13}\text{C}$  NMR (101 MHz,  $\text{CDCl}_3$ )  $\delta$  170.88, 170.78, 160.47, 131.53, 128.01, 127.19, 126.91 (q,  $J = 277.4$  Hz), 123.61, 109.46, 71.61, 62.43, 61.80, 61.74, 56.21, 38.95, 33.92 (q,  $J = 28.8$  Hz), 31.96, 29.72, 17.20 (q,  $J = 2.9$  Hz), 14.12, 14.11. HRMS ESI ( $m/z$ ):  $[\text{M}+\text{Na}]^+$  calcd. for  $\text{C}_{21}\text{H}_{26}\text{F}_3\text{N}_3\text{NaO}_5$ : 480.1722, found: 480.1716.

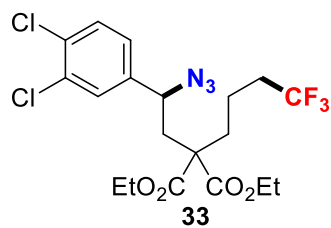

Prepared according to General Procedure B and obtained as colorless oil.  $^1\text{H}$  NMR (400 MHz,  $\text{CDCl}_3$ )  $\delta$  7.48 (d,  $J = 8.3$  Hz, 1H), 7.44 (s, 1H), 7.18 (dd,  $J = 8.3, 2.0$  Hz, 1H), 4.56 (dd,  $J = 7.4, 5.7$  Hz, 1H), 4.31 – 4.07 (m, 4H), 2.30 – 2.19 (m, 2H), 2.16 – 1.99 (m, 4H), 1.59 – 1.47 (m, 1H), 1.44 – 7.0 Hz, 6H).  $^{19}\text{F}$  NMR (376 MHz,  $\text{CDCl}_3$ )  $\delta$  -66.24 (t,  $J =$  MHz,  $\text{CDCl}_3$ )  $\delta$  170.71, 170.59, 140.15, 133.30, 132.80, ,  $J = 276.6$  Hz), 126.19, 62.04, 61.91, 61.70, 56.15, 39.55, 2.57, 17.27 (q,  $J = 3.0$  Hz), 14.12, 14.11. HRMS ESI ( $m/z$ ):  $\text{Cl}_2\text{F}_3\text{N}_3\text{NaO}_4$ : 506.0837, found: 506.0830.

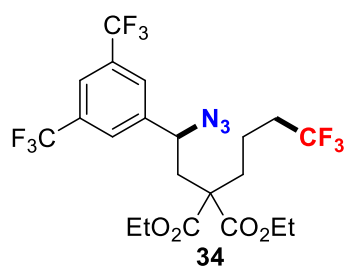

Prepared according to General Procedure B and obtained as colorless oil.  $^1\text{H}$  NMR (400 MHz,  $\text{CDCl}_3$ )  $\delta$  7.87 (s, 1H), 7.81 (s, 2H), 4.80 (dd,  $J$  = 8.9, 3.9 Hz, 1H), 4.33 – 4.12 (m, 4H), 2.35 – 2.22 (m, 2H), 2.22 – 2.00 (m, 4H), 1.64 – 1.50 (m, 1H), 1.46 – 1.34 (m, 1H), 1.30 (t,  $J$  = 7.1 Hz, 3H), 1.29 (t,  $J$  = 7.1 Hz, 3H).  $^{19}\text{F}$  NMR (376 MHz,  $\text{CDCl}_3$ )  $\delta$  -62.92 (s), -66.28 (t,  $J$  = 10.7 Hz).  $^{13}\text{C}$  NMR (101 MHz,  $\text{CDCl}_3$ )  $\delta$  170.67, 170.55, 143.13, 132.59 (q,  $J$  = 33.6 Hz), 127.00, 126.97, 126.87 (d,  $J$  = 276.4 Hz), 123.16 (d,  $J$  = 272.8 Hz), 122.77 – 122.53 (m), 56.26, 40.32, 33.89 (q,  $J$  = 28.9 Hz), 33.02, 17.34 (q,  $J$  = 2.8 Hz), 14.11, 14.09. HRMS ESI ( $m/z$ ):  $[\text{M}+\text{Na}]^+$  calcd. for  $\text{C}_{21}\text{H}_{22}\text{F}_9\text{N}_3\text{NaO}_4$ : 574.1364, found: 574.1360.

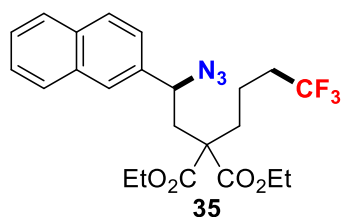

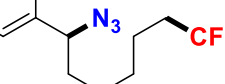
 Prepared according to General Procedure B and obtained as colorless oil.  $^1\text{H}$  NMR (400 MHz,  $\text{CDCl}_3$ )  $\delta$  7.89 (d,  $J$  = 8.6 Hz, 1H), 7.88 – 7.82 (m, 2H), 7.77 (s, 1H), 7.56 – 7.49 (m, 2H), 7.46 (dd,  $J$  = 8.5, 1.7 Hz, 1H), 4.71 (dd,  $J$  = 8.7, 4.6 Hz, 1H), 4.26 – 4.05 (m, 4H), 2.50 – 2.36 (m, 2H), 2.19 – 1.96 (m, 4H), 1.56 – 1.47 (m, 1H), 1.46 – 1.34 (m, 1H), 1.29 (t,  $J$  = 7.1 Hz, 3H), 1.24 (t,  $J$  = 7.1 Hz, 3H).  $^{19}\text{F}$  NMR (376 MHz,  $\text{CDCl}_3$ )  $\delta$  -66.27 (t,  $J$  = 10.8 Hz, 3F).  $^{13}\text{C}$  NMR (101 MHz,  $\text{CDCl}_3$ )  $\delta$  170.91, 170.80, 136.91, 133.37, 133.23, 129.21, 128.18, 127.88, 127.07 (q,  $J$  = 254.6 Hz), 126.76, 126.66, 126.15, 124.41, 62.85, 61.90, 61.82, 56.27, 39.04, 33.93 (q,  $J$  = 28.9 Hz), 32.24, 17.26 (q,  $J$  = 2.9 Hz), 14.16, 14.12. HRMS ESI ( $m/z$ ):  $[\text{M}+\text{Na}]^+$  calcd. for  $\text{C}_{23}\text{H}_{26}\text{F}_3\text{N}_3\text{NaO}_4$ : 488.1773, found: 488.1773.

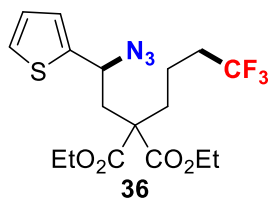

Prepared according to General Procedure B and obtained as colorless oil.  $^1\text{H}$  NMR (400 MHz,  $\text{CDCl}_3$ )  $\delta$  7.30 – 7.22 (m, 1H), 7.03 – 6.96 (m, 1H), 6.96 – 6.89 (m, 1H), 4.70 (t,  $J$  = 6.1 Hz, 1H), 4.24 – 4.03 (m, 4H), 2.44 – 2.37 (m, 2H), 2.18 – 1.83 (m, 4H), 1.49 – 1.39 (m, 1H), 1.37 – 1.28 (m, 1H), 1.20 (t,  $J$  = 7.1 Hz, 3H), 1.18 (t,  $J$  = 7.1 Hz, 3H).  $^{19}\text{F}$  NMR (376 MHz,  $\text{CDCl}_3$ )  $\delta$  -66.29 (t,  $J$  = 10.5 Hz, 3F).  $^{13}\text{C}$  NMR (101 MHz,  $\text{CDCl}_3$ )  $\delta$  170.71, 170.64, 142.29, 126.99, 126.90 (q,  $J$  = 277.3 Hz), 125.98, 125.82, 61.97, 61.87, 57.75, 56.18, 39.41, 33.96 (q,  $J$  = 28.7 Hz), 32.14, 17.29 (q,  $J$  = 3.1 Hz), 14.12. HRMS ESI ( $m/z$ ):  $[\text{M}+\text{Na}]^+$  calcd. for  $\text{C}_{17}\text{H}_{22}\text{F}_3\text{N}_3\text{NaO}_4\text{S}$ : 444.1181, found: 444.1181.

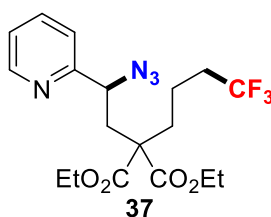

Prepared according to General Procedure B and obtained as colorless oil.  $^1\text{H}$  NMR (400 MHz,  $\text{CDCl}_3$ )  $\delta$  8.62 (d,  $J$  = 4.3 Hz, 1H), 7.74 (td,  $J$  = 7.7, 1.7 Hz, 1H), 7.34 (d,  $J$  = 7.8 Hz, 1H), 7.31 – 7.23 (m, 1H), 4.55 (dd,  $J$  = 9.1, 4.1 Hz, 1H), 4.29 – 4.12 (m, 4H), 2.55 (dd,  $J$  = 15.0, 4.1 Hz, 1H), 2.47 (dd,  $J$  = 15.0, 9.2 Hz, 1H), 2.17 – 1.94 (m, 4H), 1.59 – 1.37 (m, 2H), 1.28 (t,  $J$  = 7.2 Hz, 3H), 1.26 (t,  $J$  = 7.2 Hz, 3H).  $^{19}\text{F}$  NMR (376 MHz,  $\text{CDCl}_3$ )  $\delta$  -66.29 (t,  $J$  = 10.8 Hz, 3F).  $^{13}\text{C}$  NMR (101 MHz,  $\text{CDCl}_3$ )  $\delta$  170.89, 170.80, 158.81, 149.83, 137.27, 126.89 (q,  $J$  = 276.5 Hz), 123.41, 121.56, 62.88, 61.88, 61.79, 56.13, 37.36, 33.94 (q,  $J$  = 28.7 Hz), 32.16, 17.17 (q,  $J$  = 3.0 Hz), 14.10. HRMS ESI ( $m/z$ ):  $[\text{M}+\text{Na}]^+$  calcd. for  $\text{C}_{18}\text{H}_{23}\text{F}_3\text{N}_4\text{NaO}_4$ : 439.1569, found: 439.1569.

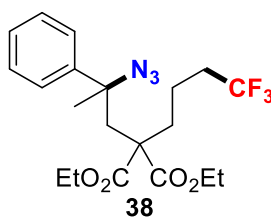

Prepared according to General Procedure B and obtained as colorless oil.  $^1\text{H}$  NMR (400 MHz,  $\text{CDCl}_3$ )  $\delta$  7.42 (d,  $J$  = 7.5 Hz, 2H), 7.36 (t,  $J$  = 7.6 Hz, 2H), 7.31 – 7.25 (m, 1H), 4.31 – 4.15 (m, 2H), 4.10 – 3.965 (m, 2H), 2.68 (d,  $J$  = 15.4 Hz, 1H), 2.58 (d,  $J$  = 15.4 Hz, 1H), 1.85 (td,  $J$  = 13.5, 4.7 Hz, 1H), 1.74 (s, 3H), 1.71 – 1.62 (m, 1H), 1.48 – 1.34 (m, 2H), 1.28 (t,  $J$  = 7.1 Hz, 3H), 1.18 (t,  $J$  = 7.1 Hz, 3H), 1.14 – 0.94 (m, 2H).  $^{19}\text{F}$  NMR (376 MHz,  $\text{CDCl}_3$ )  $\delta$  -66.54 (t,  $J$  = 10.8 Hz).  $^{13}\text{C}$  NMR (101 MHz,  $\text{CDCl}_3$ )  $\delta$  171.09, 170.74, 143.39, 128.70, 127.61, 126.93 (q,  $J$  = 276.74 Hz), 125.64, 65.04, 61.75, 61.61, 56.43, 42.87, 33.65 (q,  $J$  = 28.6 Hz), 30.60, 28.57, 17.13 (q,  $J$  = 3.0 Hz), 14.09, 14.02. HRMS ESI ( $m/z$ ):  $[\text{M}+\text{Na}]^+$  calcd. for  $\text{C}_{20}\text{H}_{26}\text{F}_3\text{N}_3\text{NaO}_4$ : 452.1773, found: 452.1776.

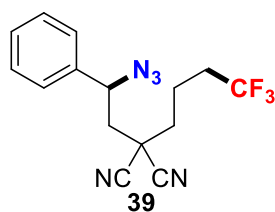

Prepared according to General Procedure B and obtained as colorless oil.  $^1\text{H}$  NMR (400 MHz,  $\text{CDCl}_3$ )  $\delta$  7.51 – 7.41 (m, 3H), 7.41 – 7.34 (m, 2H), 4.90 (dd,  $J$  = 9.9, 4.5 Hz, 1H), 2.40 (dd,  $J$  = 14.4, 9.9 Hz, 1H), 2.29 – 1.95 (m, 7H).  $^{19}\text{F}$  NMR (376 MHz,  $\text{CDCl}_3$ )  $\delta$  -65.91 (t,  $J$  = 10.4 Hz, 3F).  $^{13}\text{C}$  NMR (101 MHz,  $\text{CDCl}_3$ )  $\delta$  136.99, 129.80, 129.63, 127.04, 126.45 (q,  $J$  = 277.5 Hz), 114.64, 114.31, 62.86, 43.30, 37.69, 35.47, 32.91 (q,  $J$  = 29.6 Hz), 18.51 (q,  $J$  = 3.1 Hz). HRMS ESI ( $m/z$ ):  $[\text{M}+\text{Na}]^+$  calcd. for  $\text{C}_{15}\text{H}_{14}\text{F}_3\text{N}_5\text{Na}$ : 344.1099, found: 344.1099.

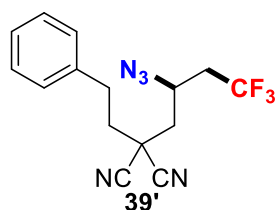

Prepared according to General Procedure B and obtained as colorless oil.  $^1\text{H}$  NMR (400 MHz,  $\text{CDCl}_3$ )  $\delta$  7.38 – 7.31 (m, 2H), 7.30 – 7.20 (m, 4H), 4.17 – 4.04 (m, 1H), 3.12 – 2.93 (m, 2H), 2.63 – 2.48 (m, 1H), 2.46 – 2.36 (m, 1H), 2.34 – 2.23 (m, 2H), 2.23 – 2.07 (m, 2H).  $^{19}\text{F}$  NMR (376 MHz,  $\text{CDCl}_3$ )  $\delta$  -63.46 (t,  $J$  = 10.1 Hz, 3F).  $^{13}\text{C}$  NMR (101 MHz,  $\text{CDCl}_3$ )  $\delta$  138.02, 129.13, 128.54, 127.33, 124.99 (q,  $J$  = 277.4 Hz), 114.63, 114.43, 54.01 (q,  $J$  = 2.7 Hz), 41.81, 40.66, 39.05 (q,  $J$  = 28.9 Hz), 35.27, 31.86. HRMS ESI ( $m/z$ ):  $[\text{M}+\text{Na}]^+$  calcd. for  $\text{C}_{15}\text{H}_{14}\text{F}_3\text{N}_5\text{Na}$ : 344.1099, found: 344.1099.

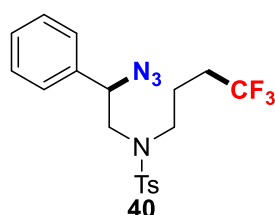

Prepared according to General Procedure B and obtained as colorless oil.  $^1\text{H}$  NMR (400 MHz,  $\text{CDCl}_3$ )  $\delta$  7.69 (d,  $J$  = 8.3 Hz, 2H), 7.44 – 7.35 (m, 3H), 7.35 – 7.30 (m, 4H), 4.94 (dd,  $J$  = 8.9, 4.9 Hz, 1H), 3.36 – 3.20 (m, 2H), 3.14 – 2.97 (m, 2H), 2.43 (s, 3H), 2.24 – 2.07 (m, 1H), 2.04 – 1.90 (m, 1H), 1.83 – 1.66 (m, 2H).  $^{19}\text{F}$  NMR (376 MHz,  $\text{CDCl}_3$ )  $\delta$  -66.11 (t,  $J$  = 10.9 Hz, 3F).  $^{13}\text{C}$  NMR (101 MHz,  $\text{CDCl}_3$ )  $\delta$  144.10, 137.18, 135.61, 130.05, 129.22, 129.04, 127.40, 127.14, 127.04 (q,  $J$  = 276.2 Hz), 66.20, 55.09, 49.74, 31.11 (q,  $J$  = 29.1 Hz), 21.67, 21.26 (q,  $J$  = 2.8 Hz). HRMS ESI ( $m/z$ ):  $[\text{M}+\text{Na}]^+$  calcd. for  $\text{C}_{19}\text{H}_{21}\text{F}_3\text{N}_4\text{NaO}_2\text{S}$ : 449.1235, found: 449.1235.

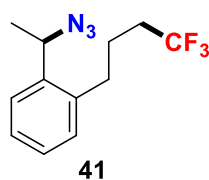

Prepared according to General Procedure B and obtained as colorless oil.  $^1\text{H}$  NMR (400 MHz,  $\text{CDCl}_3$ )  $\delta$  7.44 – 7.40 (m, 1H), 7.32 – 7.26 (m, 2H), 7.21 – 7.17 (m, 1H), 4.82 (q,  $J$  = 6.8 Hz, 1H), 2.81 – 2.70 (m, 2H), 2.23 – 2.09 (m, 2H), 1.88 (dt,  $J$  = 15.3, 7.7 Hz, 2H), 1.55 (d,  $J$  = 6.8 Hz, 3H).  $^{19}\text{F}$  NMR (376 MHz,  $\text{CDCl}_3$ )  $\delta$  -66.10 (t,  $J$  = 10.8 Hz, 3F).  $^{13}\text{C}$  NMR (101 MHz,  $\text{CDCl}_3$ )  $\delta$  138.44, 138.13, 129.78, 128.37, 127.27, 127.16 (q,  $J$  = 277.4 Hz), 126.44, 56.73, 33.51 (q,  $J$  = 28.6 Hz), 31.33, 23.75 (q,  $J$  = 2.8 Hz), 21.22. HRMS ESI ( $m/z$ ):  $[\text{M}-\text{N}_2+\text{H}]^+$  calcd. for  $\text{C}_{12}\text{H}_{15}\text{F}_3\text{N}$ : 230.1157, found: 230.1157.

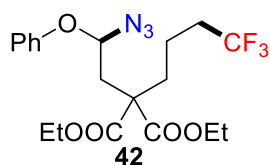

Prepared according to General Procedure B and obtained as colorless oil.  $^1\text{H}$  NMR (500 MHz,  $\text{CDCl}_3$ )  $\delta$  7.32 (dd,  $J = 8.6, 7.5$  Hz, 2H), 7.07 (t,  $J = 7.4$  Hz, 1H), 7.03 – 6.96 (m, 2H), 5.12 (dd,  $J = 7.8, 4.1$  Hz, 1H), 4.24 (q,  $J = 7.2$  Hz, 2H), 4.21 – 4.16 (m, 1H), 4.13 – 4.05 (m, 1H), 2.71 – 2.50 (m, 2H), 2.14 – 1.95 (m, 4H), 1.60 – 1.53 (m, 1H), 1.51 – 1.43 (m, 1H), 1.26 (t,  $J = 7.0$  Hz, 3H), 1.19 (t,  $J = 7.1$  Hz, 3H).  $^{13}\text{C}$  NMR (126 MHz,  $\text{CDCl}_3$ )  $\delta$  170.50, 156.19, 129.91, 126.89 (q,  $J = 277.2$  Hz), 123.29, 116.70, 86.83, 62.07, 61.91, 55.36, 37.64, 33.94 (q,  $J = 28.7$  Hz), 32.54, 29.84, 17.32 (q,  $J = 3.1$  Hz), 14.11, 13.99.  $^{19}\text{F}$  NMR (471 MHz,  $\text{CDCl}_3$ )  $\delta$  -66.28 (t,  $J = 11.1$  Hz). HRMS ESI ( $m/z$ ):  $[\text{M}+\text{Na}]^+$  calcd. for  $\text{C}_{19}\text{H}_{24}\text{F}_3\text{N}_3\text{NaO}_5$ : 454.1560, found: 454.1570.

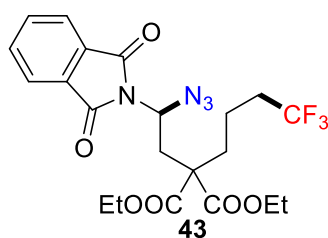

Prepared according to General Procedure B and obtained as colorless oil.  $^1\text{H}$  NMR (500 MHz,  $\text{CDCl}_3$ )  $\delta$  7.90 (dd,  $J = 5.4, 3.1$  Hz, 2H), 7.79 (dd,  $J = 5.5, 3.0$  Hz, 2H), 5.73 (t,  $J = 6.6$  Hz, 1H), 4.19 (qd,  $J = 7.1, 2.9$  Hz, 2H), 4.17 – 4.09 (m, 1H), 4.08 – 4.00 (m, 1H), 2.84 (qd,  $J = 15.1, 6.6$  Hz, 2H), 2.18 – 1.98 (m, 4H), 1.58 – 1.52 (m, 1H), 1.50 – 1.41 (m, 1H), 1.26 – 1.22 (m, 6H).  $^{13}\text{C}$  NMR (126 MHz,  $\text{CDCl}_3$ )  $\delta$  170.21, 166.82, 134.72, 131.39, 126.73 (q,  $J = 275.9$  Hz), 123.89, 63.35, 61.99, 55.63, 35.01, 33.81 (q,  $J = 28.7$  Hz), 32.32, 17.12, 13.93, 13.85.  $^{19}\text{F}$  NMR (471 MHz,  $\text{CDCl}_3$ )  $\delta$  -66.32 (t,  $J = 11.0$  Hz). HRMS ESI ( $m/z$ ):  $[\text{M}+\text{Na}]^+$  calcd. for  $\text{C}_{21}\text{H}_{23}\text{F}_3\text{N}_4\text{NaO}_6$ : 507.1462, found: 507.1465.

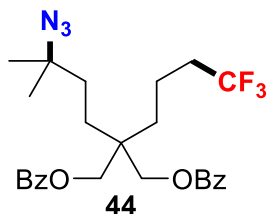

Prepared according to General Procedure B and obtained as colorless oil.  $^1\text{H}$  NMR (400 MHz,  $\text{CDCl}_3$ )  $\delta$  8.05 – 7.98 (m, 4H), 7.60 – 7.54 (m, 2H), 7.44 (t,  $J = 7.7$  Hz, 4H), 4.30 (s, 4H), 2.18 – 2.05 (m, 2H), 1.73 – 1.49 (m, 8H), 1.27 (s, 6H).  $^{19}\text{F}$  NMR (376 MHz,  $\text{CDCl}_3$ )  $\delta$  -66.04 (t,  $J = 10.8$  Hz, 3F).  $^{13}\text{C}$  NMR (101 MHz,  $\text{CDCl}_3$ )  $\delta$  166.38, 133.38, 129.91, 129.68, 128.67, 127.04 (q,  $J = 276.5$  Hz), 66.40, 61.32, 40.09, 34.53, 34.39 (q,  $J = 28.5$  Hz), 31.12, 26.09, 25.85, 15.96 (q,  $J = 3.0$  Hz). HRMS ESI ( $m/z$ ):  $[\text{M}+\text{Na}]^+$  calcd. for  $\text{C}_{26}\text{H}_{30}\text{N}_3\text{O}_4\text{F}_3\text{Na}$ : 528.2086, found: 528.2086.

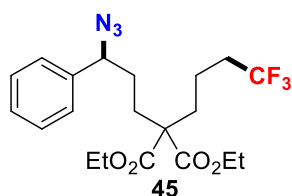

Prepared according to General Procedure B and obtained as colorless oil.  $^1\text{H}$  NMR (400 MHz,  $\text{CDCl}_3$ )  $\delta$  7.43 – 7.31 (m, 3H), 7.31 – 7.27 (m, 2H), 4.40 (t,  $J = 6.9$  Hz, 1H), 4.24 – 4.10 (m, 4H), 2.13 – 1.98 (m, 3H), 1.94 – 1.86 (m, 2H), 1.86 – 1.75 (m, 1H), 1.76 – 1.61 (m, 2H), 1.43 – 1.32 (m, 2H), 1.23 (d,  $J = 7.1$  Hz, 3H), 1.21 (t,  $J = 7.1$  Hz, 3H).  $^{19}\text{F}$  NMR (376 MHz,  $\text{CDCl}_3$ )  $\delta$  -66.28 (t,  $J = 10.8$  Hz).  $^{13}\text{C}$  NMR (101 MHz,  $\text{CDCl}_3$ )  $\delta$  171.08, 139.08, 129.05, 128.65 (q,  $J = 277.6$  Hz).



Hz), 126.96, 126.84, 66.18, 61.63, 61.60, 56.94, 33.95 (q,  $J = 28.7$  Hz), 31.70, 30.91, 29.17, 17.05 (q,  $J = 2.3$  Hz), 14.19, 14.17. HRMS ESI ( $m/z$ ):  $[M+Na]^+$  calcd. for  $C_{20}H_{26}N_3O_4F_3Na$ : 452.1773, found: 452.1770.

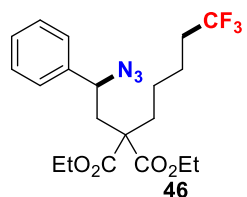

Prepared according to General Procedure B and obtained as colorless oil.  $^1H$  NMR (400 MHz,  $CDCl_3$ )  $\delta$  7.43 – 7.31 (m, 3H), 7.31 – 7.26 (m, 2H), 4.40 (t,  $J = 6.9$  Hz, 1H), 4.28 – 4.08 (m, 4H), 2.14 – 1.96 (m, 3H), 1.97 – 1.86 (m, 2H), 1.86 – 1.75 (m, 1H), 1.75 – 1.58 (m, 3H), 1.48 – 1.29 (m, 2H), 1.24 (t,  $J = 7.1$  Hz, 2H), 1.21 (t,  $J = 7.1$  Hz, 3H).  $^{19}F$  NMR (376 MHz,  $CDCl_3$ )  $\delta$  -66.28 (t,  $J = 10.8$  Hz).  $^{13}C$  NMR (101 MHz,  $CDCl_3$ )  $\delta$  171.07, 139.10, 129.04, 128.64, 126.97, 126.92 (d,  $J = 276.3$  Hz), 66.20, 61.62, 61.59, 56.97, 33.97 (q,  $J = 28.7$  Hz), 31.74, 30.92, 29.21, 17.07 (d,  $J = 3.0$  Hz), 14.19, 14.16. HRMS ESI ( $m/z$ ):  $[M+Na]^+$  calcd. for  $C_{20}H_{26}N_3O_4F_3Na$ : 452.1773, found: 452.1770.

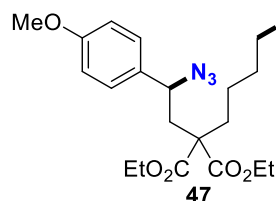

Prepared according to General Procedure B and obtained as colorless oil.  $^1H$  NMR (400 MHz,  $CDCl_3$ )  $\delta$  7.25 (d,  $J = 8.7$  Hz, 2H), 6.91 (d,  $J = 8.6$  Hz, 2H), 4.45 (dd,  $J = 8.9, 4.6$  Hz, 1H), 4.20 (q,  $J = 7.2$  Hz, 2H), 4.16 – 4.04 (m, 2H), 3.81 (s, 3H), 2.38 (dd,  $J = 14.9, 8.9$  Hz, 1H), 2.30 (dd,  $J = 14.9, 4.6$  Hz, 1H), 2.11 – 1.87 (m, 4H), 1.59 – 1.50 (m, 2H), 1.32 – 1.07 (m, 2H), 1.27 (t,  $J = 7.2$  Hz, 3H), 1.23 (t,  $J = 7.2$  Hz, 3H).  $^{19}F$  NMR (376 MHz,  $CDCl_3$ )  $\delta$  -66.32 (t,  $J = 10.9$  Hz, 3F).  $^{13}C$  NMR (101 MHz,  $CDCl_3$ )  $\delta$  171.13, 171.02, 159.84, 131.61, 128.35, 127.16 (q,  $J = 277.5$  Hz), 114.33, 62.13, 61.70, 61.65, 56.24, 55.45, 38.79, 33.46 (q,  $J = 28.6$  Hz), 32.43, 23.40, 22.20 (q,  $J = 3.0$  Hz), 14.15, 14.12. HRMS ESI ( $m/z$ ):  $[M+Na]^+$  calcd. for  $C_{21}H_{28}N_3O_5F_3Na$ : 482.1879, found: 482.1880.

## Derivatization studies

### General procedure C for reduction

**13** (0.2 mmol) and Pd/C (10%) were combined in a 25 mL oven-dried Schleck tube. The vessel was evacuated and backfilled with  $H_2$ . After that, MeOH was added via syringe  $H_2$  stream. The tube was sealed with a rubber cap and inserted with a balloon of  $H_2$ . Until completion, the reaction mixture was diluted with EtOAc (10 mL) and filtered through a pad of celite. The filtrate was concentrated, and the residue was then purified by flash column chromatography to give the amide.



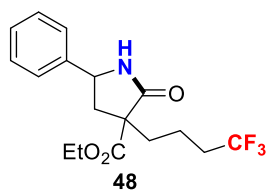

<sup>1</sup>H NMR (400 MHz, CDCl<sub>3</sub>) δ 7.43 – 7.25 (m, 5H), 6.92 (s, 0.5H), 6.74 (s, 0.5H), 4.87 (t, *J* = 7.8 Hz, 0.5H), 4.71 (t, *J* = 7.4 Hz, 0.5H), 4.34 – 4.20 (m, 1H), 4.16 (q, *J* = 7.1 Hz, 1H), 2.96 (dd, *J* = 13.1, 6.8 Hz, 0.5H), 2.63 – 2.46 (m, 1H), 2.25 – 1.42 (m, 6.5H), 1.31 (t, *J* = 7.1 Hz, 1.5H), 1.22 (t, *J* = 7.1 Hz, 1.5H). <sup>19</sup>F NMR (376 MHz, CDCl<sub>3</sub>) δ -66.20 (t, *J* = 10.8 Hz, 3F), -66.37 (t, *J* = 10.8 Hz, 3F). <sup>13</sup>C NMR (101 MHz, CDCl<sub>3</sub>) δ 175.49, 174.72, 171.38, 170.83, 141.91, 141.52, 129.12, 128.94, 128.32, 128.19, 126.97 (q, *J* = 277.75 Hz), 126.90 (q, *J* = 277.75 Hz), 126.05, 125.80, 62.06, 61.87, 56.37, 56.02, 55.44, 55.38, 41.45, 40.48, 33.98 (q, *J* = 28.3 Hz), 33.94 (q, *J* = 28.3 Hz), 33.24, 33.05, 17.66 – 17.45 (m), 14.19, 14.02. HRMS ESI (*m/z*): [M+Na]<sup>+</sup> calcd. for C<sub>17</sub>H<sub>20</sub>F<sub>3</sub>NO<sub>3</sub>Na: 366.1293, found: 366.1287.

#### General procedure D for the synthesis of triazoles

CuI (0.01 mmol) was added in a 25 mL oven-dried sealed tube. The vessel was evacuated and backfilled with N<sub>2</sub> (repeated for 3 times), after that, **13** (0.1 mmol), phenylacetylene (0.3 mmol, 3.0 equiv) and THF (2.0 mL) were then added via syringe under N<sub>2</sub>. The tube was sealed with a Teflon lined cap and moved into a preheated oil bath at 60 °C for 16 h. The reaction mixture was then cooled to room temperature, diluted with EtOAc (10 mL) and filtered through a pad of celite. The filtrate was concentrated, and the residue was then purified by flash column chromatography to give the triazoles.

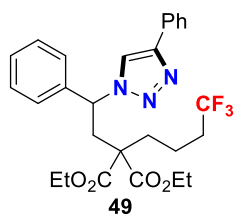

<sup>1</sup>H NMR (400 MHz, CDCl<sub>3</sub>) δ 7.79 (d, *J* = 8.2 Hz, 2H), 7.70 (s, 1H), 7.44 – 7.28 (m, 8H), 5.80 (dd, *J* = 8.0, 4.3 Hz, 1H), 4.11 – 4.02 (m, 2H), 4.00 – 3.80 (m, 2H), 3.34 (dd, *J* = 15.1, 8.4 Hz, 1H), 2.91 (dd, *J* = 15.2, 3.9 Hz, 1H), 2.07 – 1.87 (m, 4H), 1.57 – 1.47 (m, 1H), 1.43 – 1.35 (m, 1H), 1.21 (t, *J* = 7.2 Hz, 3H), 1.16 (t, *J* = 7.6 Hz, 3H). <sup>19</sup>F NMR (376 MHz, CDCl<sub>3</sub>) δ -66.24 (t, *J* = 10.8 Hz, 3F). <sup>13</sup>C NMR (101 MHz, CDCl<sub>3</sub>) δ 170.60, 170.39, 147.82, 139.49, 130.50, 129.17, 128.90, 128.83, 128.27, 126.94, 126.82 (q, *J* = 277.4 Hz), 125.73, 119.69, 61.94, 61.90, 56.42, 37.98, 33.77 (q, *J* = 28.9 Hz), 32.46, 17.22 (q, *J* = 2.9 Hz), 13.99, 13.93. HRMS ESI (*m/z*): [M+H]<sup>+</sup> calcd. for C<sub>27</sub>H<sub>31</sub>F<sub>3</sub>N<sub>3</sub>O<sub>4</sub>: 518.2267, found: 518.2274.

## IV. Mechanistic Research

### 1,5- or 1,6-deuterium shift

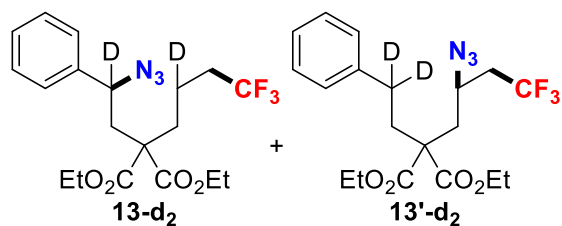

Prepared according to General Procedure B and obtained as colorless oil. The product **13-d<sub>2</sub>** and **13'-d<sub>2</sub>** was obtained as mixture with the ratio of 1.8: 1. <sup>1</sup>H NMR (400 MHz, CDCl<sub>3</sub>) δ 7.43 – 7.28 (m, 4H),

7.26 – 7.12 (m, 1H), 4.29 – 4.08 (m, 4H), 3.80 – 3.71 (m, 0.25H), 2.45 – 2.28 (m, 2H), 2.20–1.95 (m, 4H), 1.55 –1.34 (m, 0.75H), 1.31 – 1.22 (m, 6H). <sup>19</sup>F NMR (376 MHz, CDCl<sub>3</sub>) δ -63.95 (t, *J* = 10.4 Hz, 0.75F), -66.28 (t, *J* = 10.8 Hz, 2.25F). <sup>13</sup>C NMR (101 MHz, CDCl<sub>3</sub>) δ 170.95, 170.89, 170.87, 170.77, 140.82, 139.50, 129.10, 128.76, 128.72, 128.44, 126.97, 126.91 (q, *J* = 277.3 Hz), 126.45, 125.48 (q, *J* = 278.4 Hz), 62.22 (t, *J* = 21.6 Hz), 62.10, 61.86, 61.78, 56.19, 56.13, 53.64 (q, *J* = 2.7 Hz), 39.63 (q, *J* = 28.4 Hz), 38.87, 38.03, 34.83, 33.83 (q, *J* = 28.8 Hz), 32.03, 29.72, 17.05 – 16.52 (m), 14.17, 14.13, 14.11. HRMS ESI (*m/z*): [M+Na]<sup>+</sup> calcd. for C<sub>19</sub>H<sub>22</sub>D<sub>2</sub>F<sub>3</sub>N<sub>3</sub>NaO<sub>4</sub>: 440.1742, found: 440.1735.

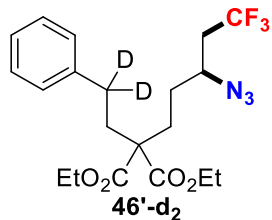

Prepared according to General Procedure B and obtained as colorless oil.  $^1\text{H}$  NMR (400 MHz,  $\text{C}_6\text{D}_6$ )  $\delta$  7.02 (d,  $J = 2.2$  Hz, 3H), 6.99 – 6.88 (m, 1H), 3.84 (qd,  $J = 7.1, 1.3$  Hz, 4H), 2.99 (dt,  $J = 8.1, 4.0$  Hz, 1H), 2.19 (s, 2H), 2.03 (ddd,  $J = 13.9, 11.6, 5.6$  Hz, 1H), 1.86 (ddd,  $J = 14.0, 11.5, 5.4$  Hz, 1H), 1.64 – 1.47 (m, 1H), 1.24 – 1.09 (m, 2H), 0.81 (t,  $J = 7.1$  Hz, 3H), 0.80 (t,  $J = 7.1$  Hz, 3H).  $^{13}\text{C}$  NMR (101 MHz,  $\text{C}_6\text{D}_6$ )  $\delta$  -63.83 (t,  $J = 10.6$  Hz, 3F).  $^{13}\text{C}$  NMR (101 MHz,  $\text{C}_6\text{D}_6$ )  $\delta$  171.01, 141.59, 128.92, 128.70, 128.30, 128.06, 127.82, 126.57, 126.34, 126.14, 125.94, 125.74, 125.54, 125.34, 125.14, 124.94, 124.74, 124.54, 124.34, 124.14, 123.94, 123.74, 123.54, 123.34, 123.14, 122.94, 122.74, 122.54, 122.34, 122.14, 121.94, 121.74, 121.54, 121.34, 121.14, 120.94, 120.74, 120.54, 120.34, 120.14, 119.94, 119.74, 119.54, 119.34, 119.14, 118.94, 118.74, 118.54, 118.34, 118.14, 117.94, 117.74, 117.54, 117.34, 117.14, 116.94, 116.74, 116.54, 116.34, 116.14, 115.94, 115.74, 115.54, 115.34, 115.14, 114.94, 114.74, 114.54, 114.34, 114.14, 113.94, 113.74, 113.54, 113.34, 113.14, 112.94, 112.74, 112.54, 112.34, 112.14, 111.94, 111.74, 111.54, 111.34, 111.14, 110.94, 110.74, 110.54, 110.34, 110.14, 109.94, 109.74, 109.54, 109.34, 109.14, 108.94, 108.74, 108.54, 108.34, 108.14, 107.94, 107.74, 107.54, 107.34, 107.14, 106.94, 106.74, 106.54, 106.34, 106.14, 105.94, 105.74, 105.54, 105.34, 105.14, 104.94, 104.74, 104.54, 104.34, 104.14, 103.94, 103.74, 103.54, 103.34, 103.14, 102.94, 102.74, 102.54, 102.34, 102.14, 101.94, 101.74, 101.54, 101.34, 101.14, 100.94, 100.74, 100.54, 100.34, 100.14, 99.94, 99.74, 99.54, 99.34, 99.14, 98.94, 98.74, 98.54, 98.34, 98.14, 97.94, 97.74, 97.54, 97.34, 97.14, 96.94, 96.74, 96.54, 96.34, 96.14, 95.94, 95.74, 95.54, 95.34, 95.14, 94.94, 94.74, 94.54, 94.34, 94.14, 93.94, 93.74, 93.54, 93.34, 93.14, 92.94, 92.74, 92.54, 92.34, 92.14, 91.94, 91.74, 91.54, 91.34, 91.14, 90.94, 90.74, 90.54, 90.34, 90.14, 89.94, 89.74, 89.54, 89.34, 89.14, 88.94, 88.74, 88.54, 88.34, 88.14, 87.94, 87.74, 87.54, 87.34, 87.14, 86.94, 86.74, 86.54, 86.34, 86.14, 85.94, 85.74, 85.54, 85.34, 85.14, 84.94, 84.74, 84.54, 84.34, 84.14, 83.94, 83.74, 83.54, 83.34, 83.14, 82.94, 82.74, 82.54, 82.34, 82.14, 81.94, 81.74, 81.54, 81.34, 81.14, 80.94, 80.74, 80.54, 80.34, 80.14, 79.94, 79.74, 79.54, 79.34, 79.14, 78.94, 78.74, 78.54, 78.34, 78.14, 77.94, 77.74, 77.54, 77.34, 77.14, 76.94, 76.74, 76.54, 76.34, 76.14, 75.94, 75.74, 75.54, 75.34, 75.14, 74.94, 74.74, 74.54, 74.34, 74.14, 73.94, 73.74, 73.54, 73.34, 73.14, 72.94, 72.74, 72.54, 72.34, 72.14, 71.94, 71.74, 71.54, 71.34, 71.14, 70.94, 70.74, 70.54, 70.34, 70.14, 69.94, 69.74, 69.54, 69.34, 69.14, 68.94, 68.74, 68.54, 68.34, 68.14, 67.94, 67.74, 67.54, 67.34, 67.14, 66.94, 66.74, 66.54, 66.34, 66.14, 65.94, 65.74, 65.54, 65.34, 65.14, 64.94, 64.74, 64.54, 64.34, 64.14, 63.94, 63.74, 63.54, 63.34, 63.14, 62.94, 62.74, 62.54, 62.34, 62.14, 61.94, 61.74, 61.54, 61.34, 61.14, 60.94, 60.74, 60.54, 60.34, 60.14, 59.94, 59.74, 59.54, 59.34, 59.14, 58.94, 58.74, 58.54, 58.34, 58.14, 57.94, 57.74, 57.54, 57.34, 57.14, 56.94, 56.74, 56.54, 56.34, 56.14, 55.94, 55.74, 55.54, 55.34, 55.14, 54.94, 54.74, 54.54, 54.34, 54.14, 53.94, 53.74, 53.54, 53.34, 53.14, 52.94, 52.74, 52.54, 52.34, 52.14, 51.94, 51.74, 51.54, 51.34, 51.14, 50.94, 50.74, 50.54, 50.34, 50.14, 49.94, 49.74, 49.54, 49.34, 49.14, 48.94, 48.74, 48.54, 48.34, 48.14, 47.94, 47.74, 47.54, 47.34, 47.14, 46.94, 46.74, 46.54, 46.34, 46.14, 45.94, 45.74, 45.54, 45.34, 45.14, 44.94, 44.74, 44.54, 44.34, 44.14, 43.94, 43.74, 43.54, 43.34, 43.14, 42.94, 42.74, 42.54, 42.34, 42.14, 41.94, 41.74, 41.54, 41.34, 41.14, 40.94, 40.74, 40.54, 40.34, 40.14, 39.94, 39.74, 39.54, 39.34, 39.14, 38.94, 38.74, 38.54, 38.34, 38.14, 37.94, 37.74, 37.54, 37.34, 37.14, 36.94, 36.74, 36.54, 36.34, 36.14, 35.94, 35.74, 35.54, 35.34, 35.14, 34.94, 34.74, 34.54, 34.34, 34.14, 33.94, 33.74, 33.54, 33.34, 33.14, 32.94, 32.74, 32.54, 32.34, 32.14, 31.94, 31.74, 31.54, 31.34, 31.14, 30.94, 30.74, 30.54, 30.34, 30.14, 29.94, 29.74, 29.54, 29.34, 29.14, 28.94, 28.74, 28.54, 28.34, 28.14, 27.

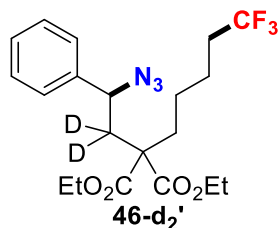

The chemical structure shows a cyclohexane ring substituted with a phenyl group at position 1, two deuterium atoms at position 2, and two ethyl ester groups at position 3. A side chain is attached at position 4, consisting of a propyl segment ending in a CF<sub>3</sub> group. The nitrogen atom in the side chain is labeled N<sub>3</sub>. The entire molecule is labeled 46-d<sub>2</sub>'.

Prepared according to General Procedure B and obtained as colorless oil. <sup>1</sup>H NMR (400 MHz, C<sub>6</sub>D<sub>6</sub>) δ 7.20 – 7.13 (m, 2H), 7.10 – 6.99 (m, 3H), 4.57 (s, 1H), 4.03 (q, *J* = 7.1 Hz, 2H), 4.00 – 3.85 (m, 2H), 1.98 (dddd, *J* = 39.7, 14.2, 12.1, 4.9 Hz, 2H), 1.49 (ddd, *J* = 15.4, 8.8, 4.4 Hz, 2H), 1.24 – 1.12 (m, 2H), 1.09 – 0.83 (m, 2H), 0.98 (t, *J* = 7.1 Hz, 3H), 0.92 (t, *J* = 7.1 Hz, 3H). <sup>19</sup>F NMR (376 MHz, C<sub>6</sub>D<sub>6</sub>) δ -66.15 (t, *J* = 11.0 Hz, 3F). <sup>13</sup>C NMR (101 MHz, C<sub>6</sub>D<sub>6</sub>) δ 170.96, 170.83, 140.20, 129.20, 128.70, 127.68 (q, *J* = 276.2 Hz), 127.20, 62.94, 61.47, 61.44, 56.37, 33.63, 33.21 (q, *J* = 28.3 Hz), 32.93, 23.48, 22.20 (q, *J* = 2.9 Hz), 14.04, 13.99. HRMS ESI (*m/z*): [M+Na]<sup>+</sup> calcd. for C<sub>19</sub>H<sub>22</sub>D<sub>2</sub>F<sub>3</sub>N<sub>3</sub>NaO<sub>4</sub>: 454.1899, found: 454.1894.

## KIE experiments

### Intramolecular

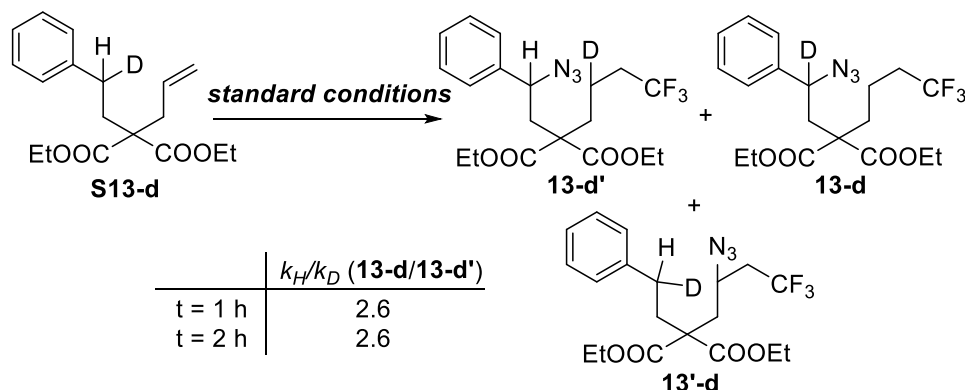

Fe (acac)<sub>3</sub> (10 mol%, 0.01 mmol, 3.53 mg), Togni-II (1.25 equiv, 0.125 mmol, 39.5 mg) were combined in a 25 mL oven-dried sealed tube. The vessel was evacuated and backfilled with N<sub>2</sub> (repeated for 3 times), after that, monodeuterated alkene **13-d** (1 equiv, 0.1 mmol), TMSN<sub>3</sub> (3.0 equiv, 0.3 mmol) and superdry DCM (1.0 mL) were then added via syringe under N<sub>2</sub>. The tube was sealed with a Teflon lined cap and moved into a preheated oil bath at 50 °C for 12 h. The reaction mixture was then cooled to room temperature, diluted with EtOAc (10 mL) and filtered through a pad of celite. The filtrate was concentrated, and the residue was then purified by flash column chromatography. Both recovered substrate and product ratios were determined by <sup>1</sup>H NMR.

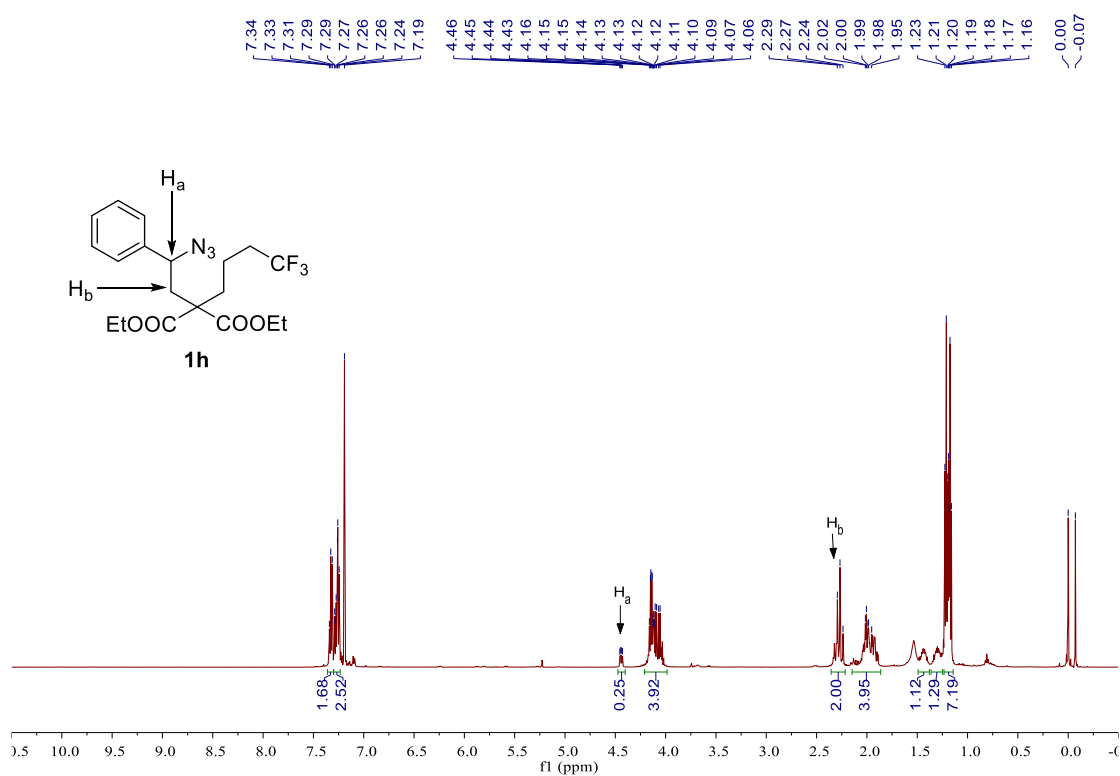

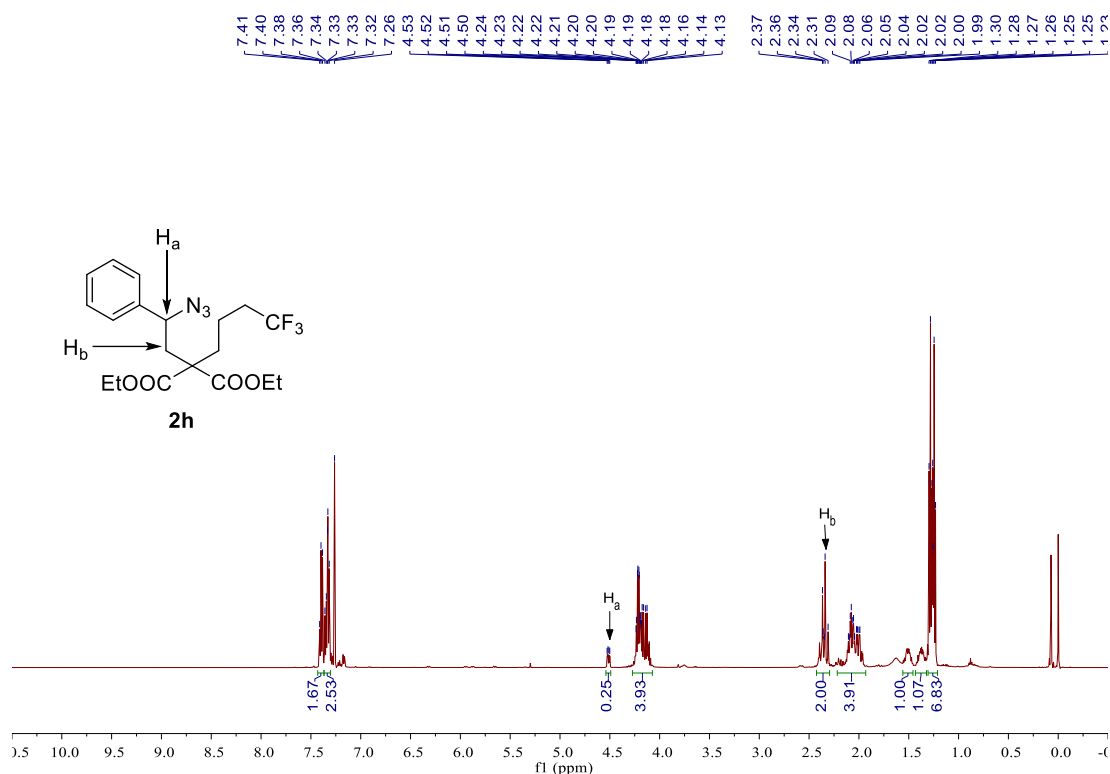

#### Intermolecular (one-pot)

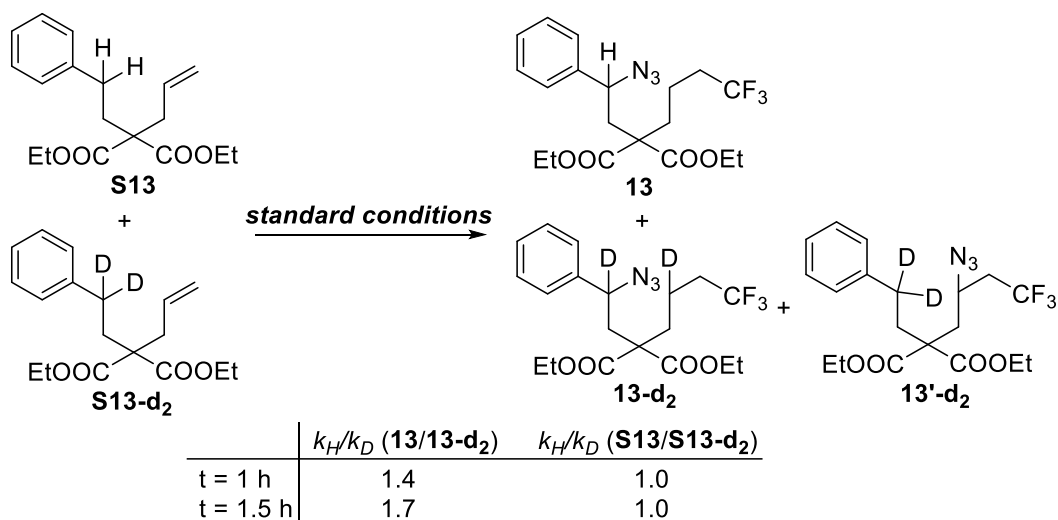

Fe (acac)<sub>3</sub> (10 mol%, 0.01 mmol, 3.53 mg), Togni-II (1.25 equiv, 0.125 mmol, 39.5 mg) were combined in a 25 mL oven-dried sealed tube. The vessel was evacuated and backfilled with N<sub>2</sub> (repeated for 3 times), after that, alkene **S13** (0.5 equiv, 0.05mmol), deuterated alkene **S13-d<sub>2</sub>** (0.5 equiv, 0.05mmol), TMSN<sub>3</sub> (3.0 equiv, 0.3 mmol) and superdry DCM (1.0 mL) were then added via syringe under N<sub>2</sub>. The tube was sealed with a Teflon lined cap and moved into a preheated oil bath at 50 °C for 12 h. The reaction mixture was then cooled to room temperature, diluted with EtOAc (10 mL) and filtered through a pad of celite. The filtrate was concentrated, and the residue was then purified by flash column chromatography. Both recovered substrate and product

ratios were determined by  $^1\text{H}$  NMR.

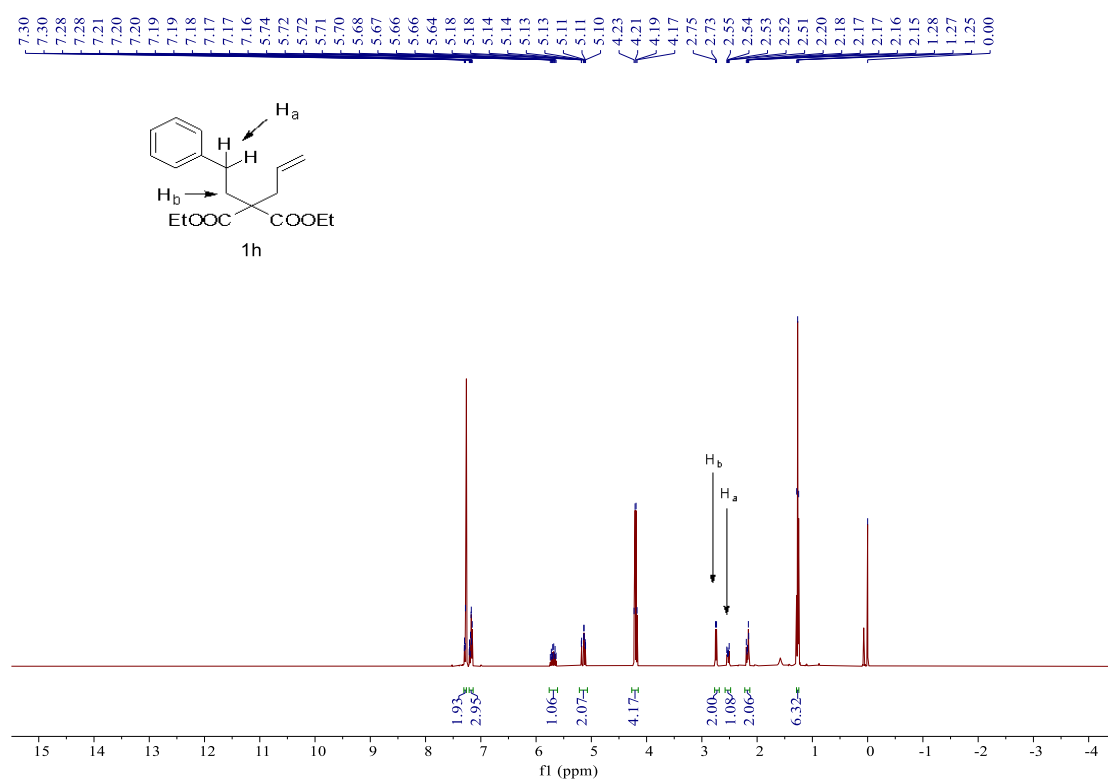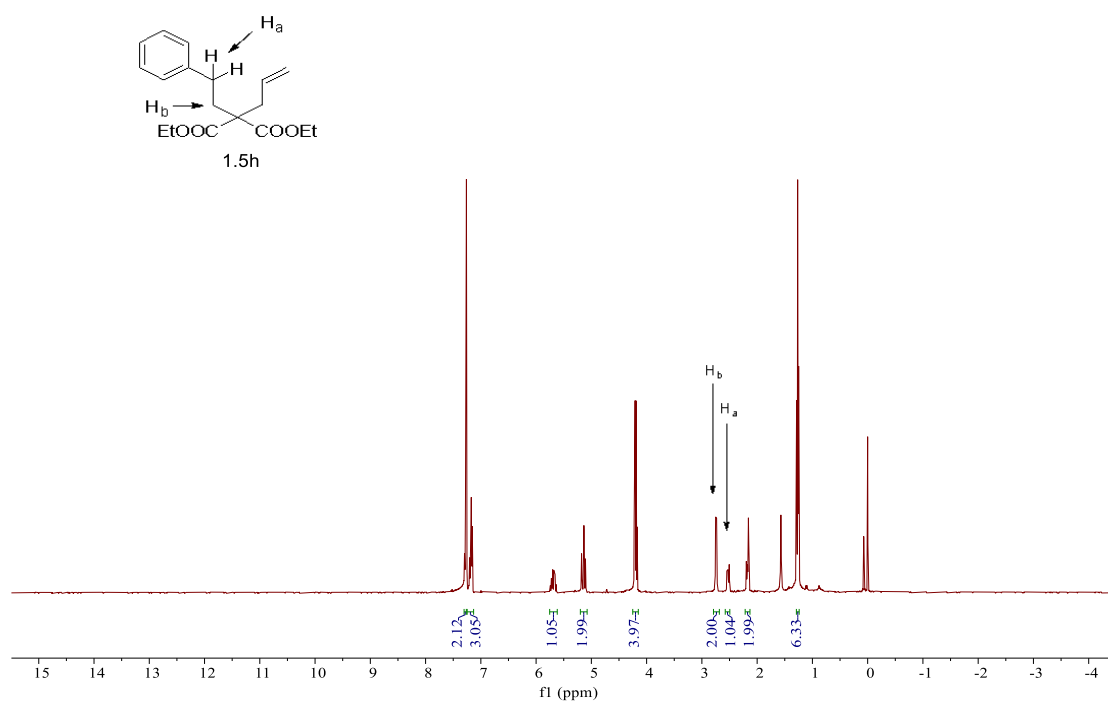

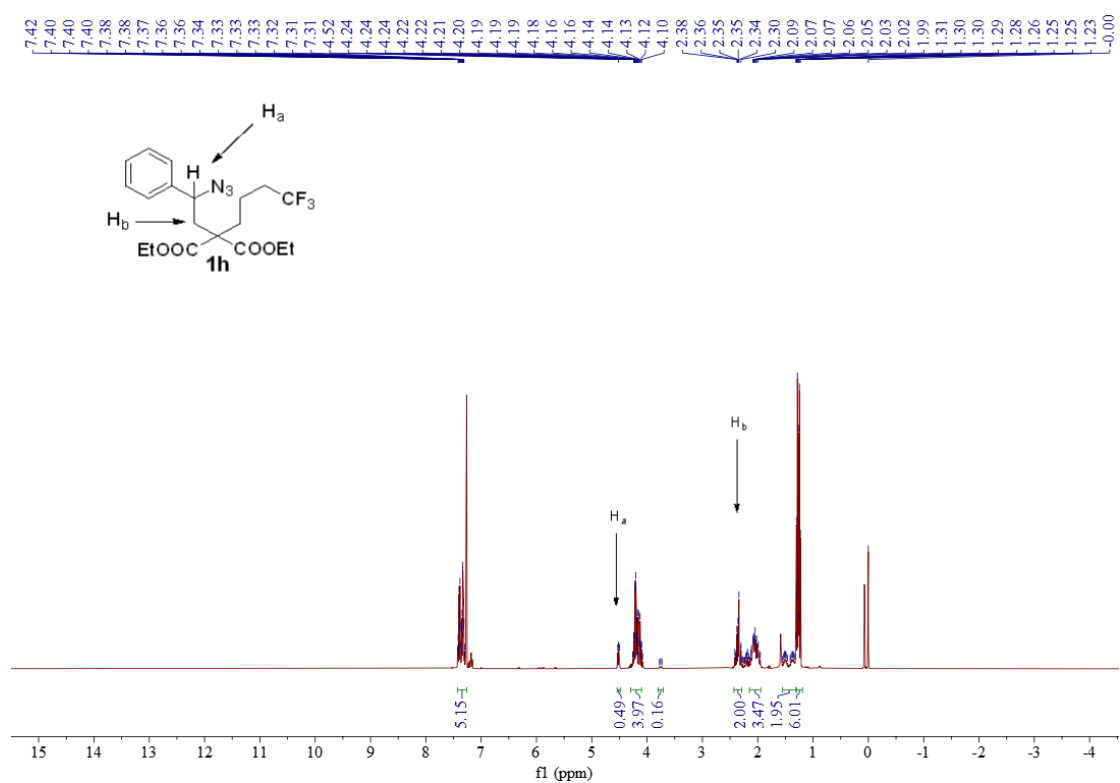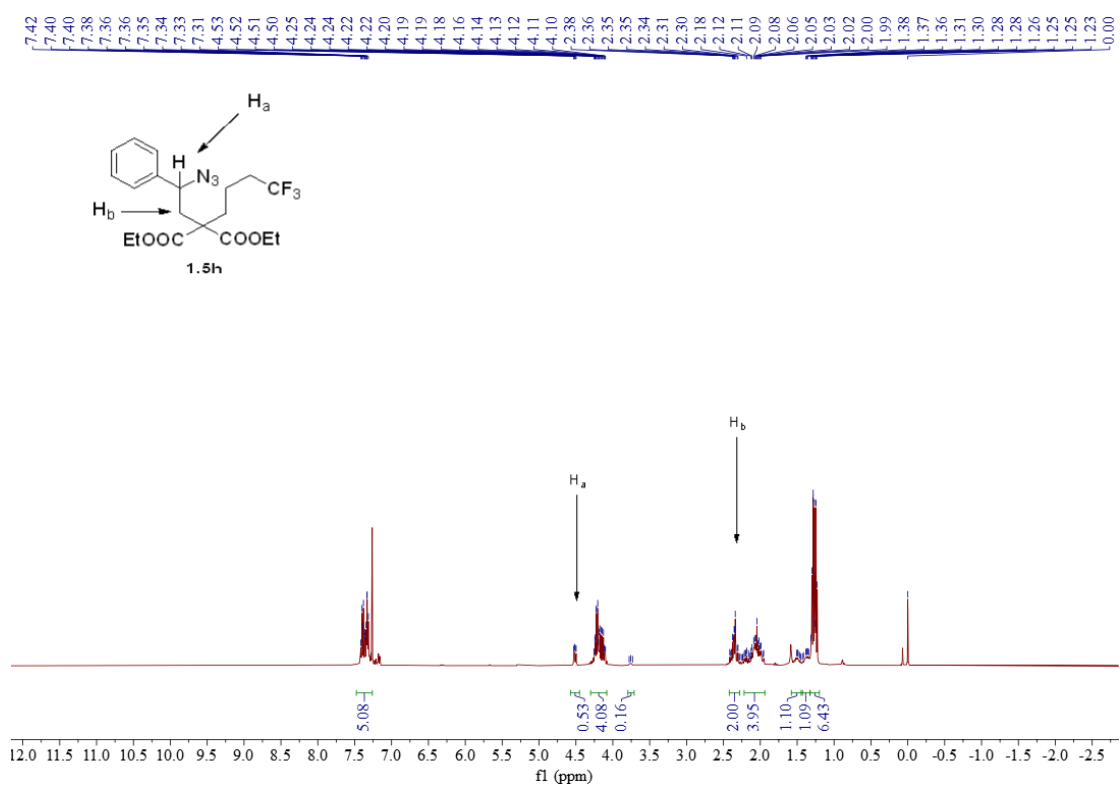

### Intermolecular (parallel)

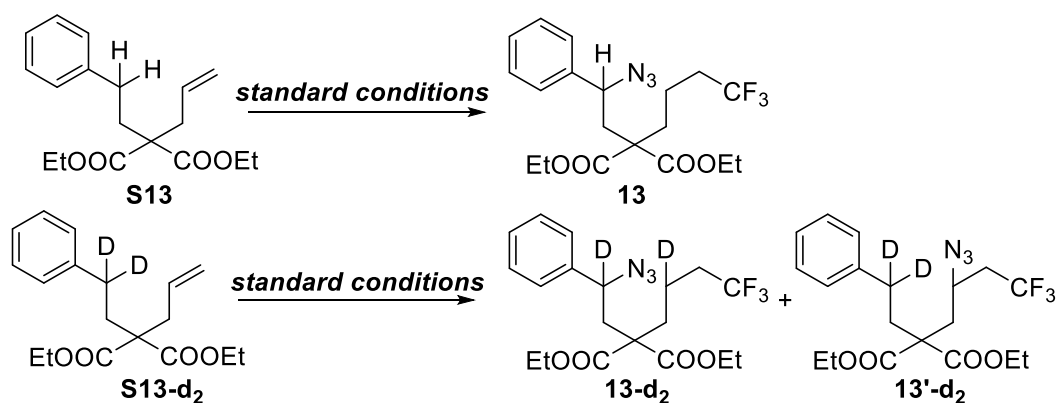

Reaction progress was monitored by <sup>19</sup>F NMR. Rate constants were determined by adding the corresponding products with PhCF<sub>3</sub> as internal standard over time and extracting the slope after linear fitting of the data (simulating the linear function and slope as the rate constants)

| t/h  | Reaction of <b>S13</b><br>(yield of product <b>13</b> ) | t/h  | Reaction of <b>S13-d<sub>2</sub></b><br>(yield of product <b>13-d<sub>2</sub></b> ) |
|------|---------------------------------------------------------|------|-------------------------------------------------------------------------------------|
| 0.33 | 0.05                                                    | 0.33 | 0.04                                                                                |
| 0.50 | 0.15                                                    | 0.50 | 0.06                                                                                |
| 0.75 | 0.2                                                     | 0.75 | 0.15                                                                                |
| 1.00 | 0.24                                                    | 1.00 | 0.14                                                                                |
| 1.50 | 0.34                                                    | 1.50 | 0.24                                                                                |
| 2.00 | 0.38                                                    | 2.00 | 0.28                                                                                |

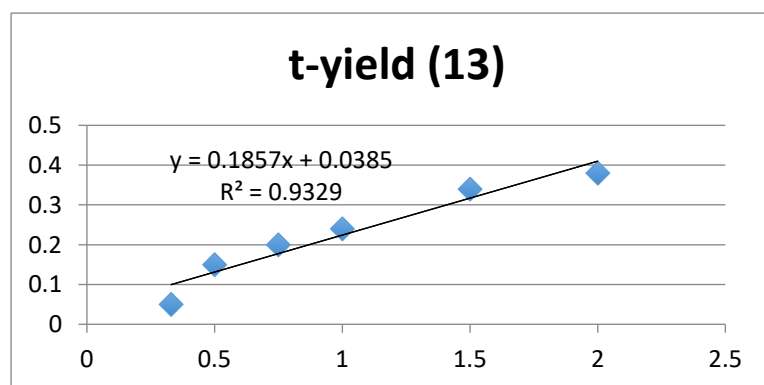

Reaction of **S13**:  $y = 0.1857 (k_H)x + 0.0385$ ,  $R^2 = 0.9329$

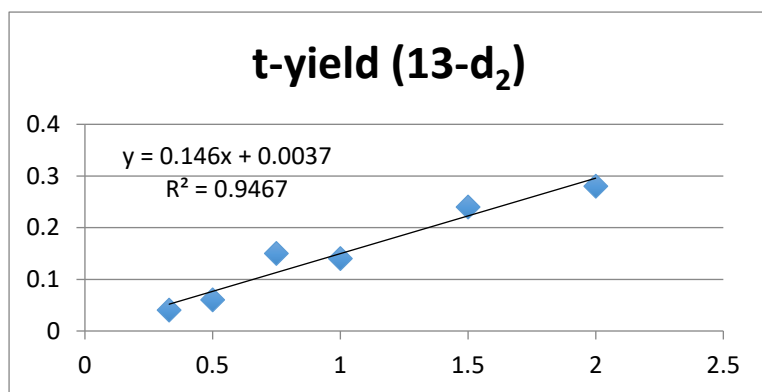

Reaction of **S13-d<sub>2</sub>**:  $y = 0.0.1460 (k_D)x + 0.0037$ ,  $R^2 = 0.9467$

$$k_H/k_D = 0.1857/0.1460 = 1.272$$

## V. Alternative Testings

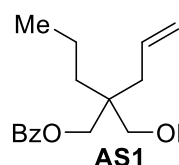

Prepared according to general procedure A and obtained as colorless oil. <sup>1</sup>H NMR (500 MHz, CDCl<sub>3</sub>) δ 8.02 (d,  $J = 7.3$  Hz, 4H), 7.56 (t,  $J = 7.4$  Hz, 2H), 7.43 (t,  $J = 7.8$  Hz, 4H), 5.92 – 5.79 (m, 1H), 5.20 – 5.07 (m, 2H), 4.31 (d,  $J = 2.7$  Hz, 4H), 2.32 (d,  $J = 7.5$  Hz, 2H), 1.52 – 1.40 (m, 4H), 0.94 (t,  $J = 7.0$  Hz, 3H). <sup>13</sup>C NMR (126 MHz, CDCl<sub>3</sub>) δ 166.52, 133.20, 132.76, 130.22, 129.71, 128.60, 119.18, 67.05, 40.65, 36.78, 34.61, 16.34, 15.03. ESI (m/z): [M+Na]<sup>+</sup> calcd. for C<sub>23</sub>H<sub>26</sub>NaO<sub>4</sub>: 389.1723, found: 389.1725.

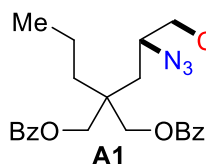

Prepared according to General Procedure B and obtained as colorless oil. <sup>1</sup>H NMR (500 MHz, CDCl<sub>3</sub>) δ 8.01 (ddd,  $J = 7.1, 6.3, 1.3$  Hz, 4H), 7.61 – 7.54 (m, 2H), 7.44 (t,  $J = 7.8$  Hz, 4H), 4.47 – 4.31 (m, 4H), 3.96 – 3.76 (m, 1H), 2.57 – 2.42 (m, 1H), 2.40 – 2.28 (m, 1H), 1.95 – 1.90 (m, 1H), 1.72 (dd,  $J = 15.1, 2.1$  Hz, 1H), 1.68 – 1.61 (m, 1H), 1.59 – 1.53 (m, 1H), 1.50 – 1.42 (m, 1H), 1.40 – 1.33 (m, 1H), 0.97 (t,  $J = 7.1$  Hz, 3H). <sup>13</sup>C NMR (126 MHz, CDCl<sub>3</sub>) δ 166.37, 133.42, 133.37, 129.71, 129.70, 128.68, 128.66, 127.63 (q,  $J = 274.7$  Hz), 66.93, 66.68, 52.88, 40.44, 40.03 (q,  $J = 28.0$  Hz), 36.80, 35.01, 16.48, 14.96. <sup>19</sup>F NMR (471 MHz, CDCl<sub>3</sub>) δ -63.70 (t,  $J = 10.3$  Hz). ESI (m/z): [M+Na]<sup>+</sup> calcd. for C<sub>24</sub>H<sub>26</sub>F<sub>3</sub>N<sub>3</sub>NaO<sub>4</sub>: 500.1768, found: 500.1754.

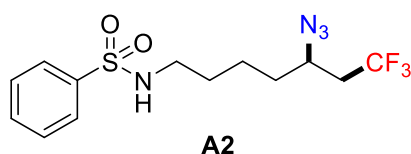

Prepared according to General Procedure B and obtained as colorless oil. <sup>1</sup>H NMR (500 MHz, CDCl<sub>3</sub>) δ 7.88 (d,  $J = 8.2$  Hz, 2H), 7.62 – 7.57 (m, 1H), 7.53 (t,  $J = 7.7$  Hz, 2H), 5.02 – 4.90 (m, 1H), 3.56 (tt,  $J = 8.9, 4.9$  Hz, 1H), 2.97 (q,  $J = 6.5$  Hz, 2H), 2.25 (dtdt,  $J = 26.0, 15.2, 10.0, 4.7$  Hz, 2H), 1.56 – 1.33 (m, 7H). <sup>13</sup>C NMR (126 MHz, CDCl<sub>3</sub>) δ 139.95, 132.87, 129.31, 128.89,



127.14, 125.72 (q,  $J = 277.4$  Hz), 56.69 (q,  $J = 2.4$  Hz), 42.93, 38.58 (q,  $J = 28.1$  Hz), 34.22, 29.25, 22.70.  $^{19}\text{F}$  NMR (471 MHz,  $\text{CDCl}_3$ )  $\delta$  -64.03 (t,  $J = 10.7$  Hz). ESI (m/z):  $[\text{M}+\text{Na}]^+$  calcd. for  $\text{C}_{13}\text{H}_{17}\text{F}_3\text{N}_4\text{NaO}_2\text{S}$ : 373.0917, found: 373.0917.

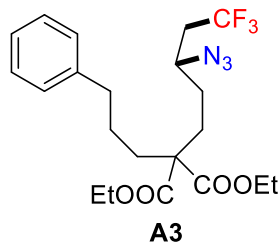

Prepared according to General Procedure B and obtained as colorless oil.  $^1\text{H}$  NMR (500 MHz,  $\text{CDCl}_3$ )  $\delta$  7.28 (d,  $J = 7.3$  Hz, 2H), 7.23 – 7.13 (m, 3H), 4.17 (qd,  $J = 7.1, 1.4$  Hz, 4H), 3.57 (tt,  $J = 8.4, 4.6$  Hz, 1H), 2.68 – 2.58 (m, 2H), 2.35 – 2.16 (m, 2H), 2.09 – 2.00 (m, 1H), 1.96 – 1.85 (m, 3H), 1.55 – 1.47 (m, 2H), 1.45 – 1.35 (m, 2H), 1.22 (td,  $J = 7.1, 1.0$  Hz, 7H).  $^{13}\text{C}$  NMR (126 MHz,  $\text{CDCl}_3$ )  $\delta$  171.23, 141.58, 128.45, 128.41, 125.99, 125.55 (q,  $J = 277.2$  Hz), 61.40, 56.89, 56.63 (q,  $J = 3.0$  Hz), 38.39 (q,  $J = 28.1$  Hz), 35.76, 31.86, 29.71, 29.24, 28.31, 25.69, 14.05.  $^{19}\text{F}$  NMR (471 MHz,  $\text{CDCl}_3$ )  $\delta$  -64.06 (t,  $J = 10.4$  Hz). ESI (m/z):  $[\text{M}+\text{Na}]^+$  calcd. for  $\text{C}_{21}\text{H}_{28}\text{F}_3\text{N}_3\text{NaO}_4$ : 466.1924, found: 466.1915.

## Reference

- [1] P. Eisenberger, S. Glischig, A. Togni, *Chem. Eur. J.* **2006**, *12*, 2579.
- [2] D. F. González, J. P. Brand, J. Waser, *Chem. Eur. J.* **2010**, *16*, 9457.
- [3] L. Li, H. Luo, Z. Zhao, Y. Li, Q. Zhou, J. Xu, J. Li, Y.-N. Ma, *Org. Lett.* **2019**, *21*, 9228.
- [4] W. Shu, E. Merino, C. Nevado, *ACS Catal.* **2018**, *8*, 6401.

# NMR Spectrum Data for New Compounds

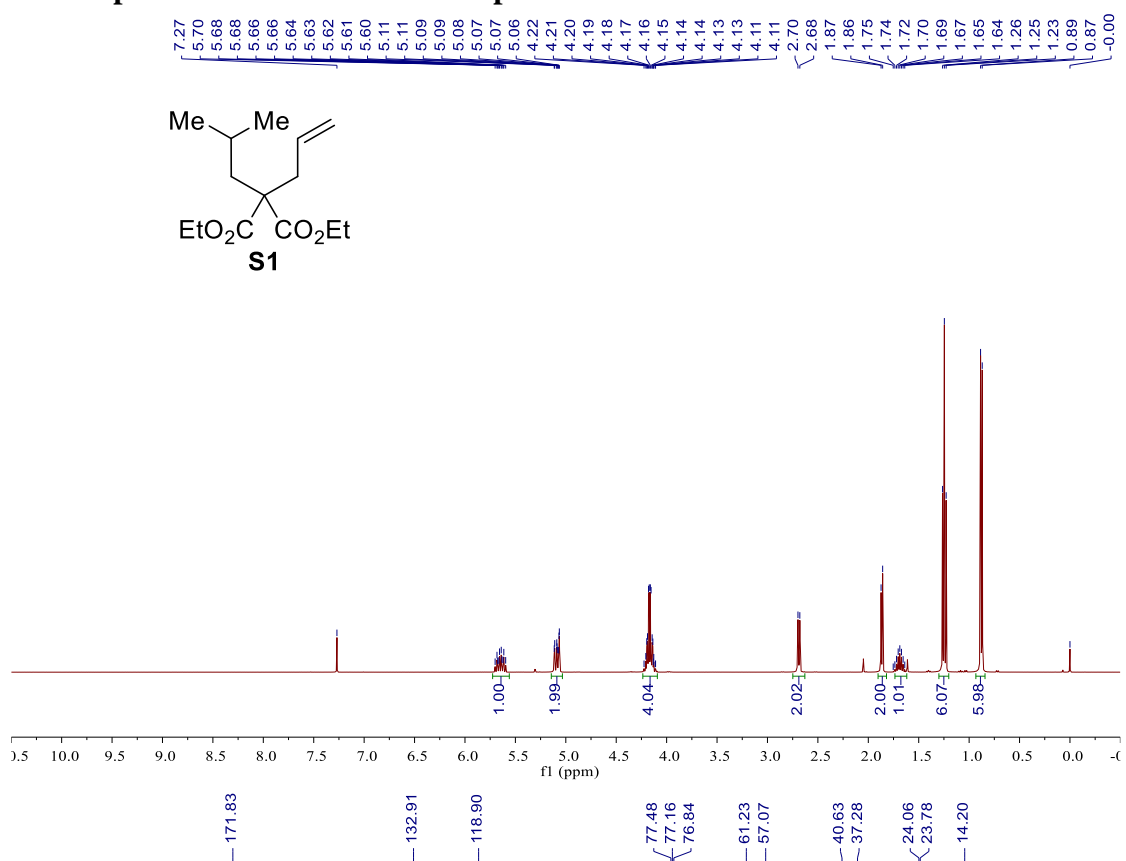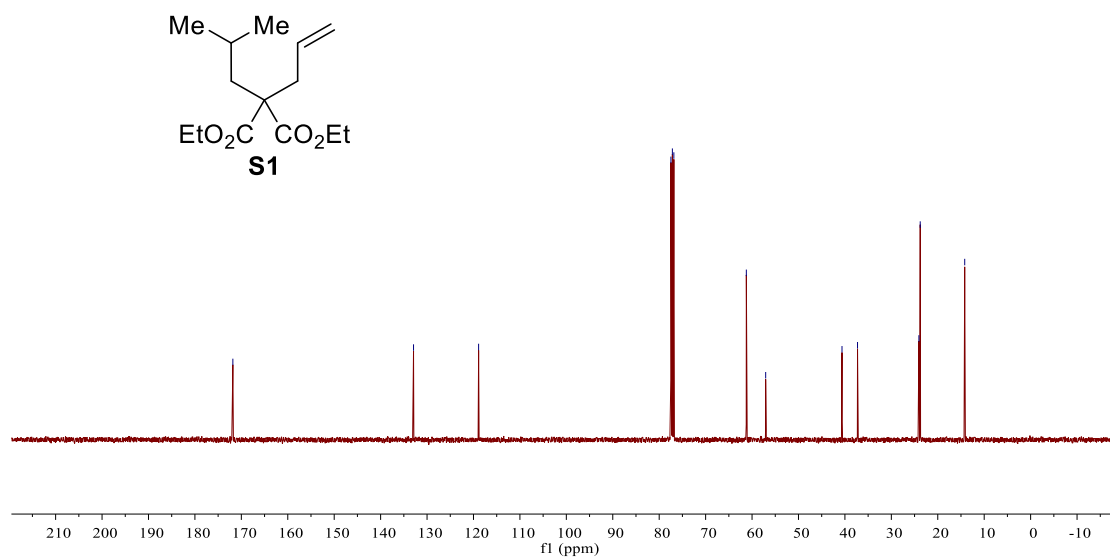

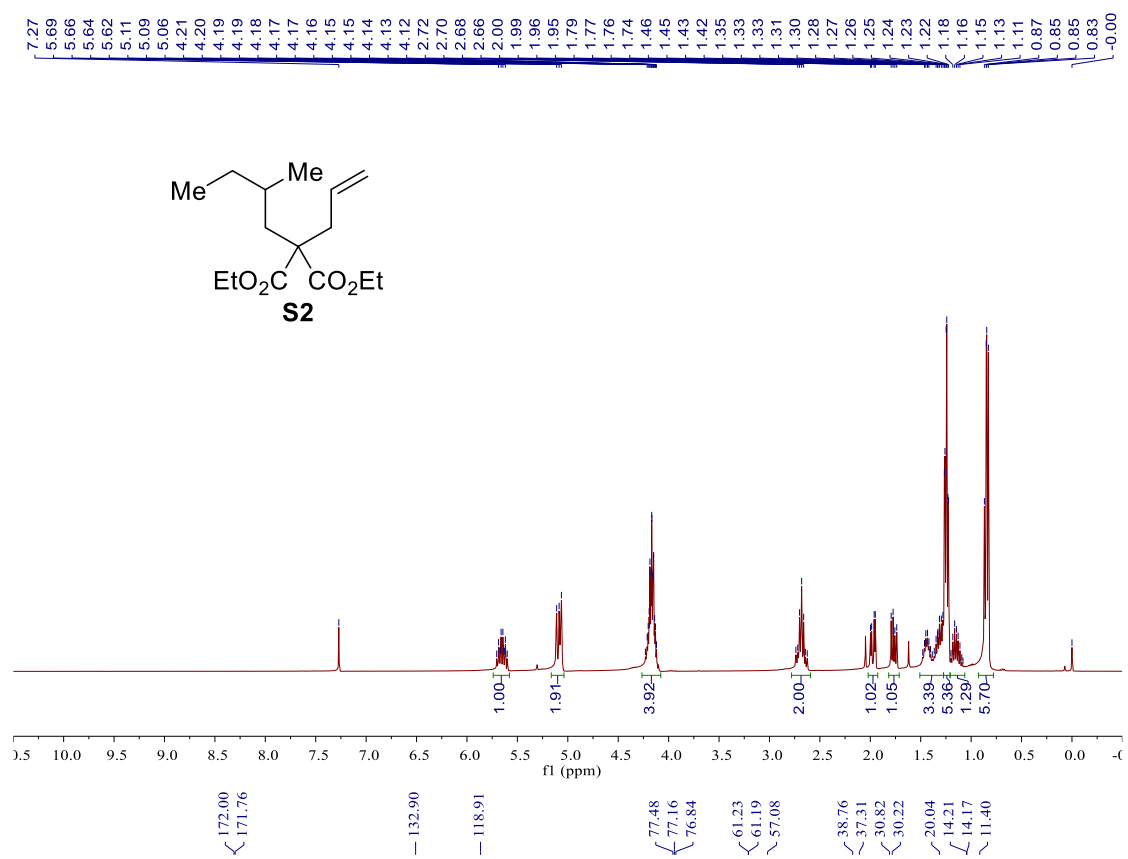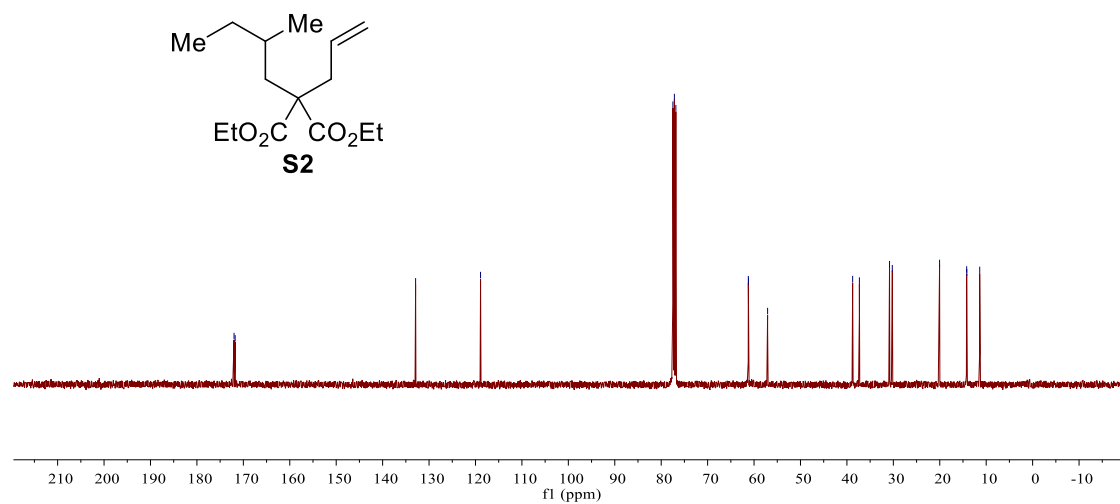

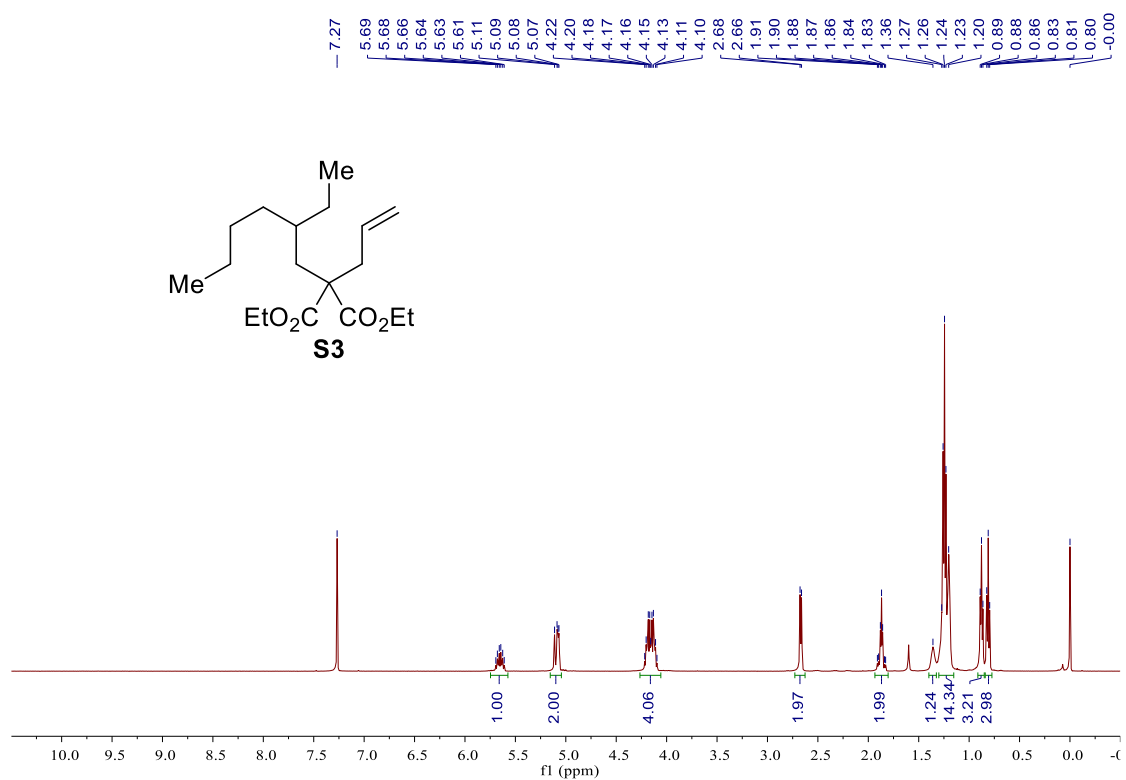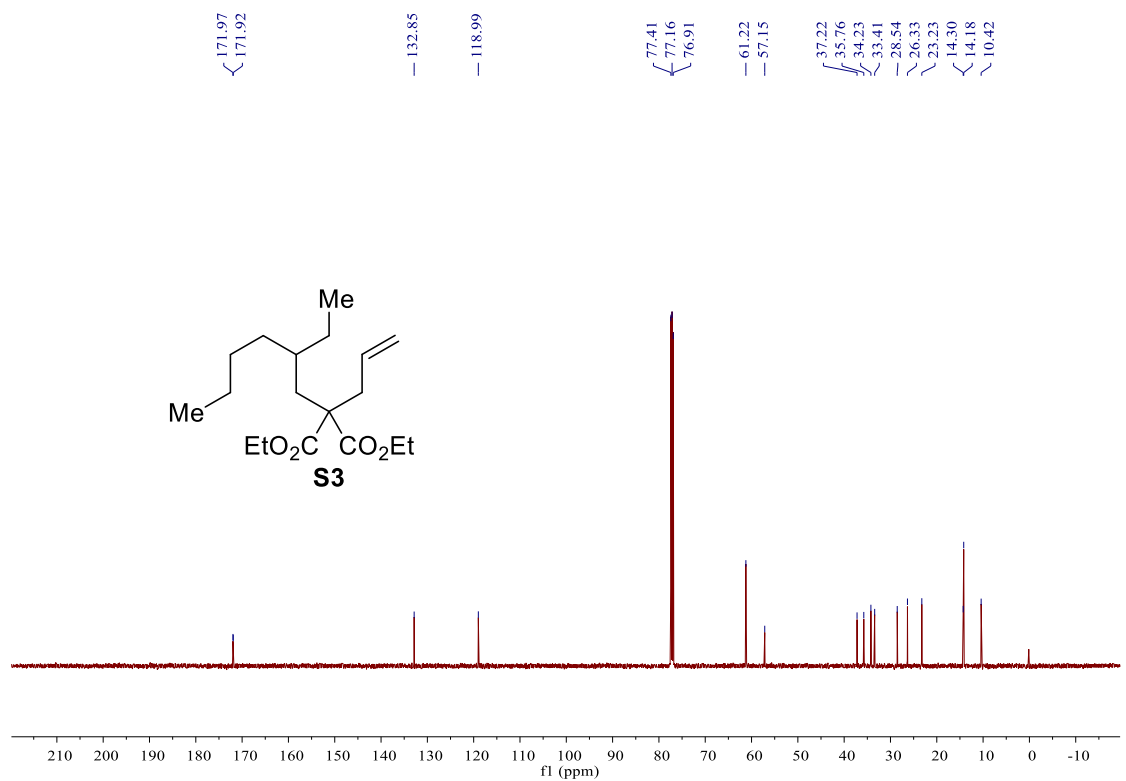

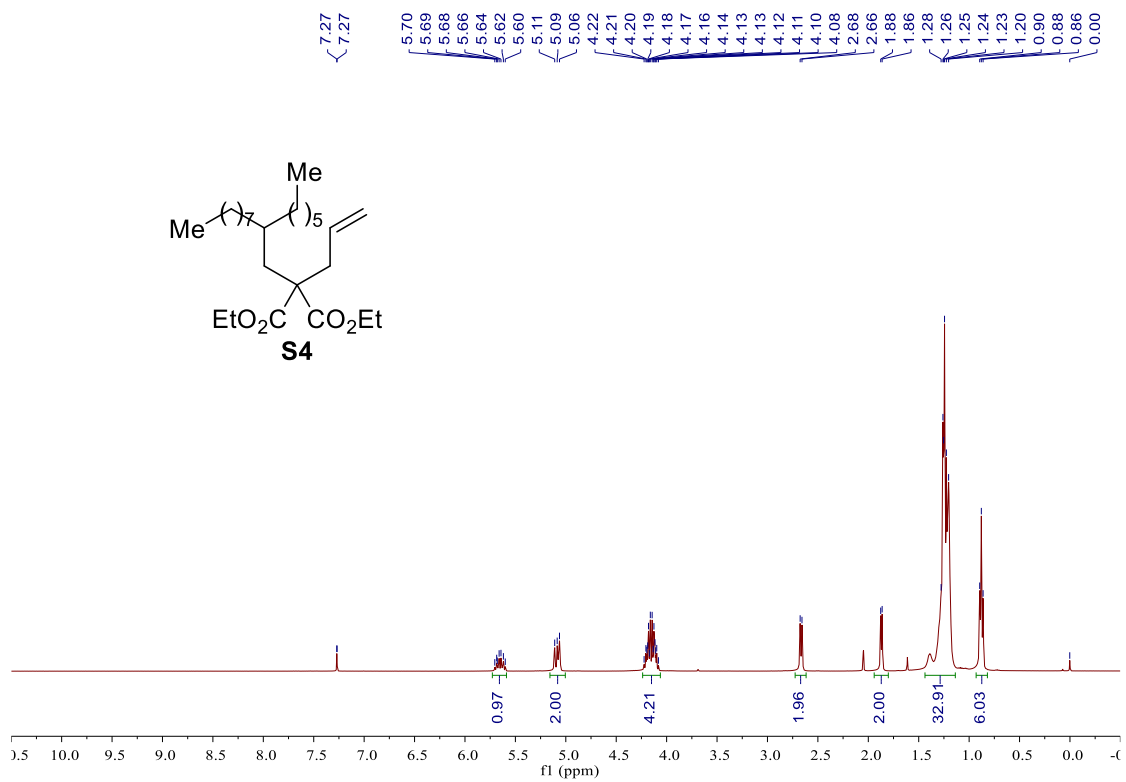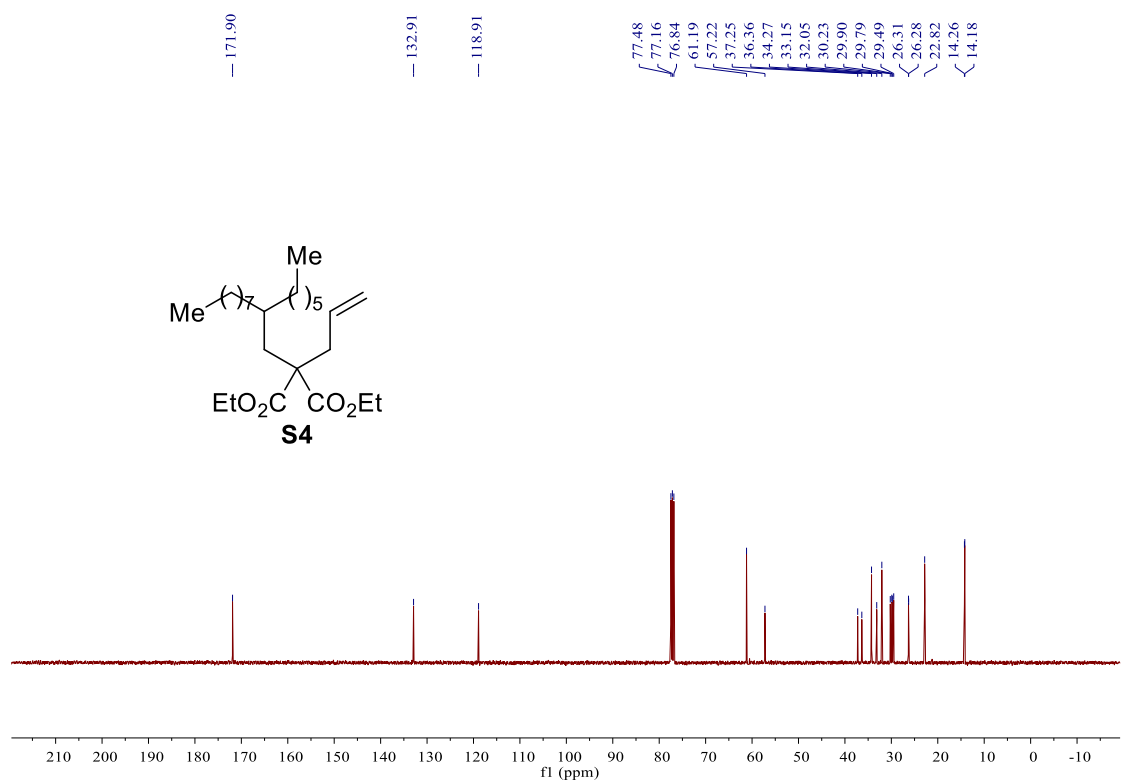

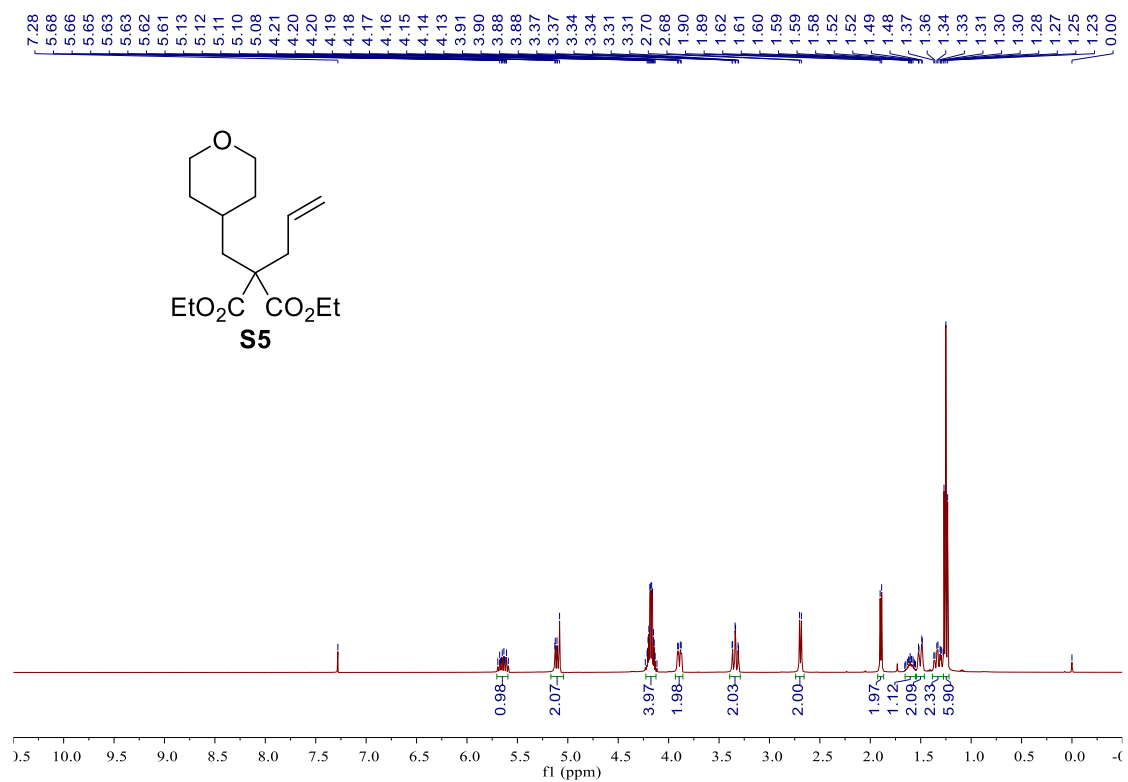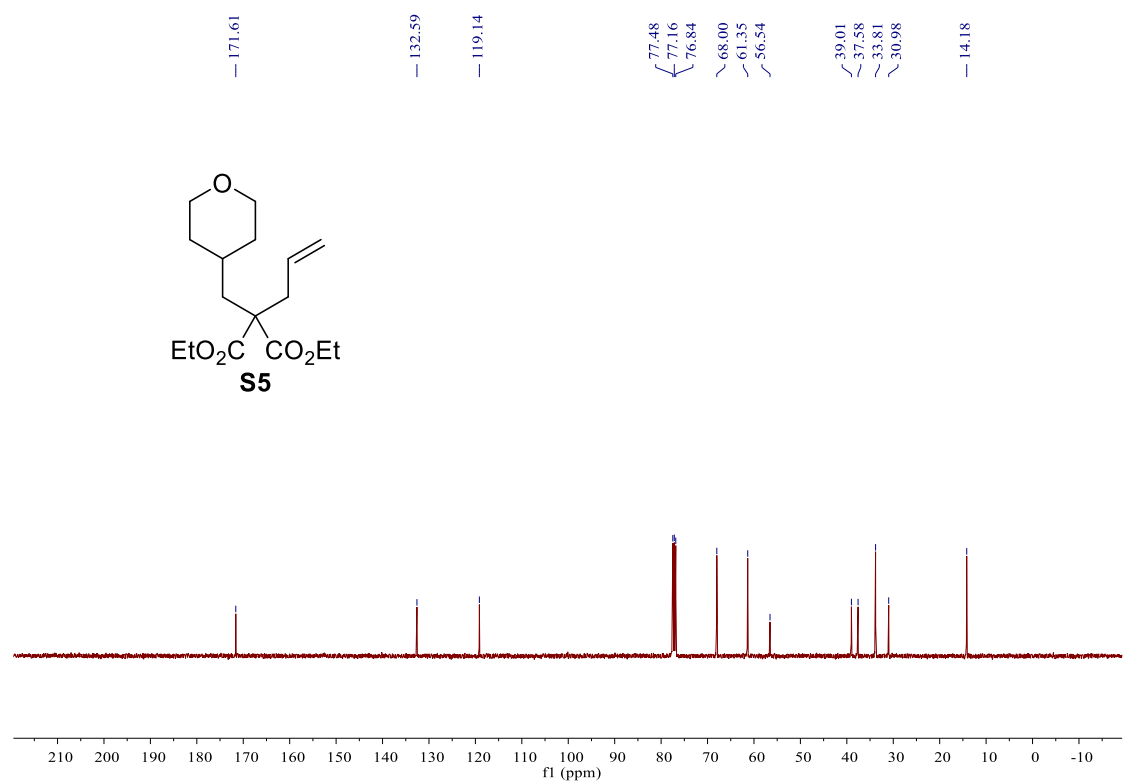

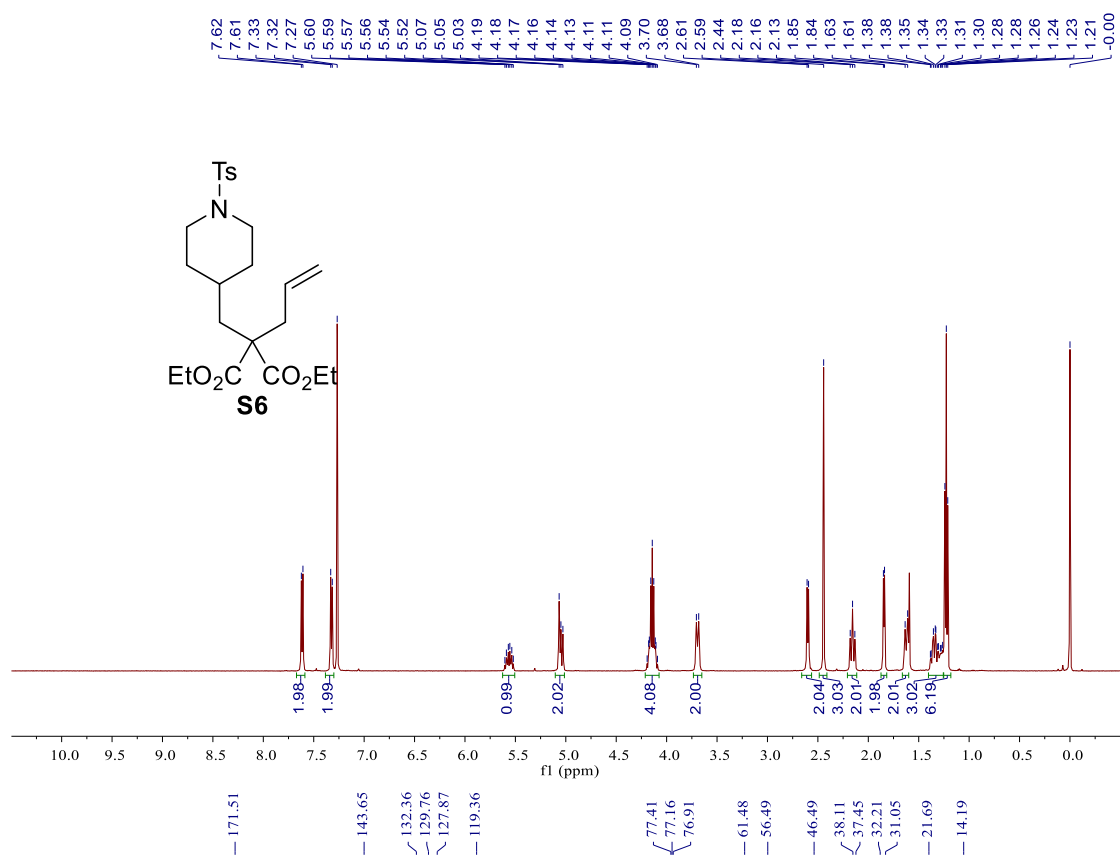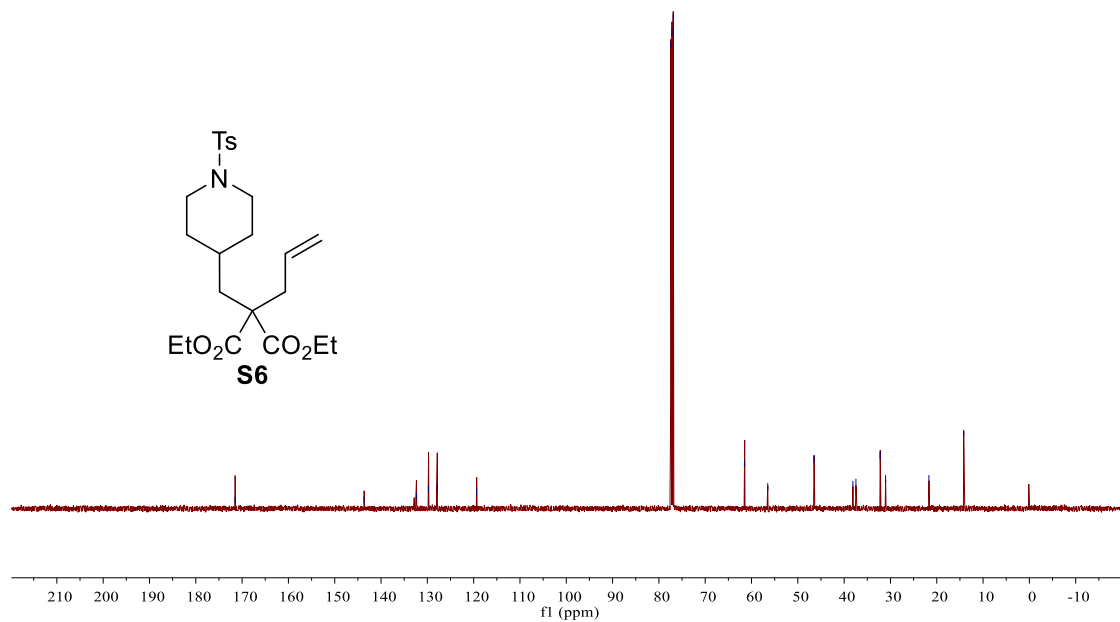

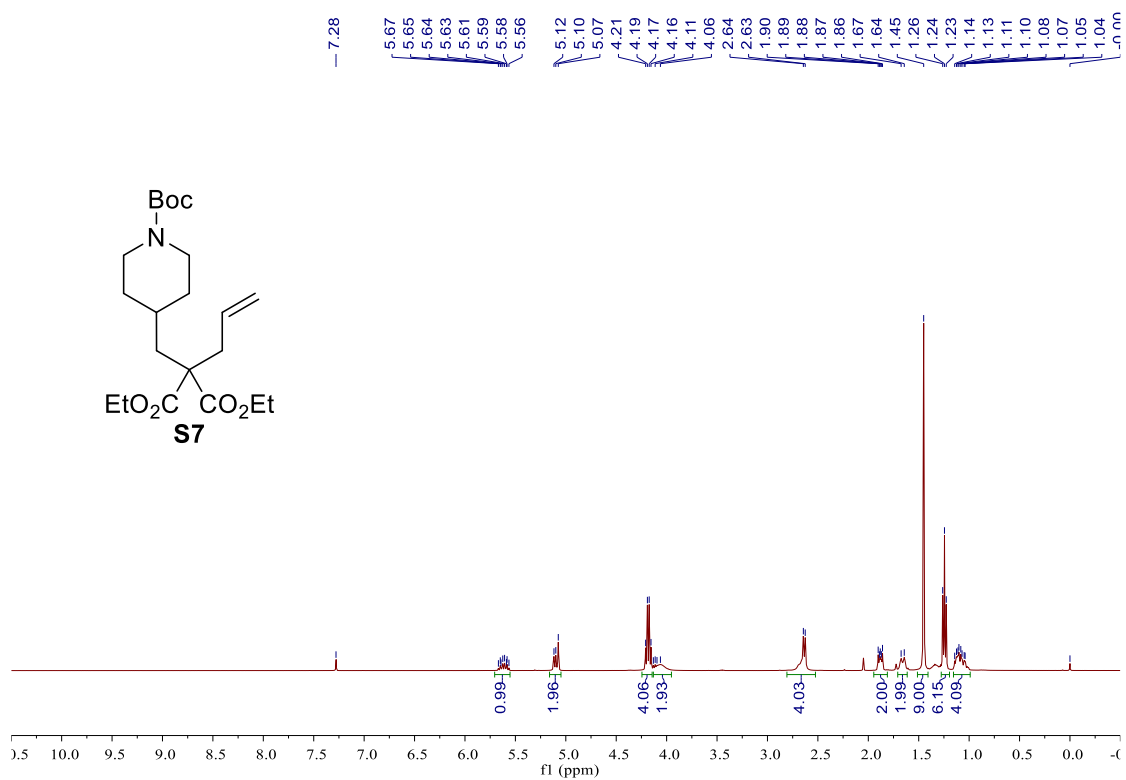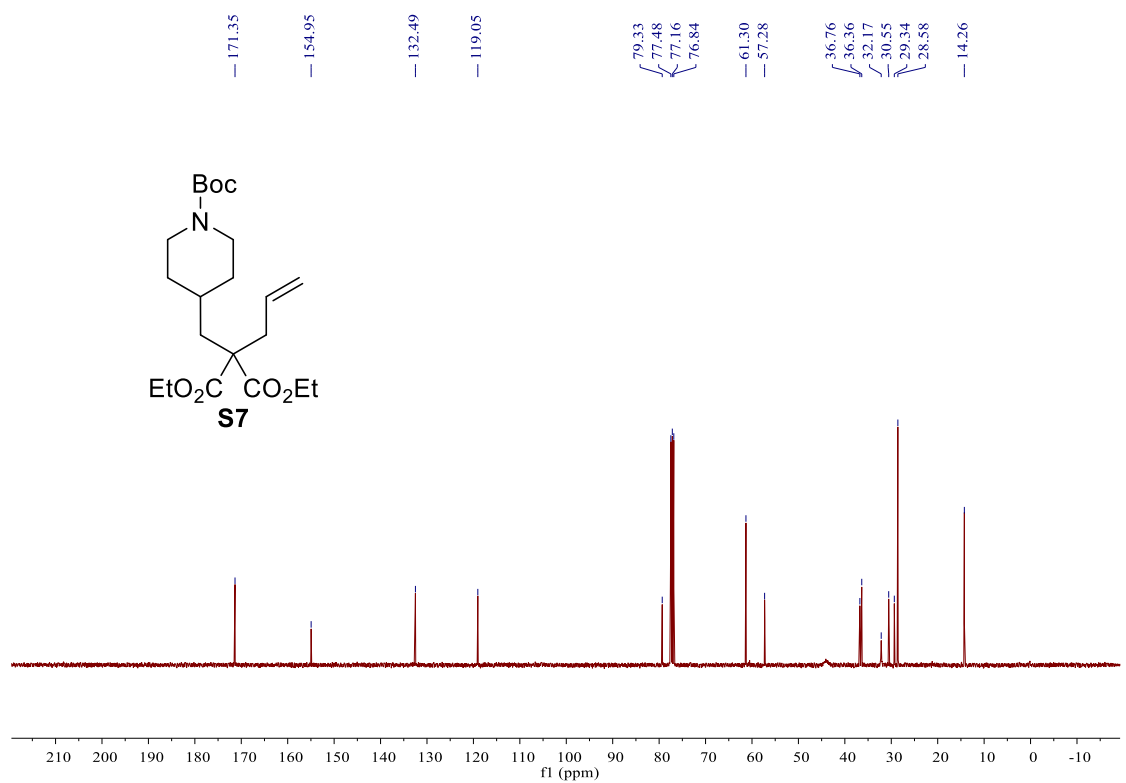



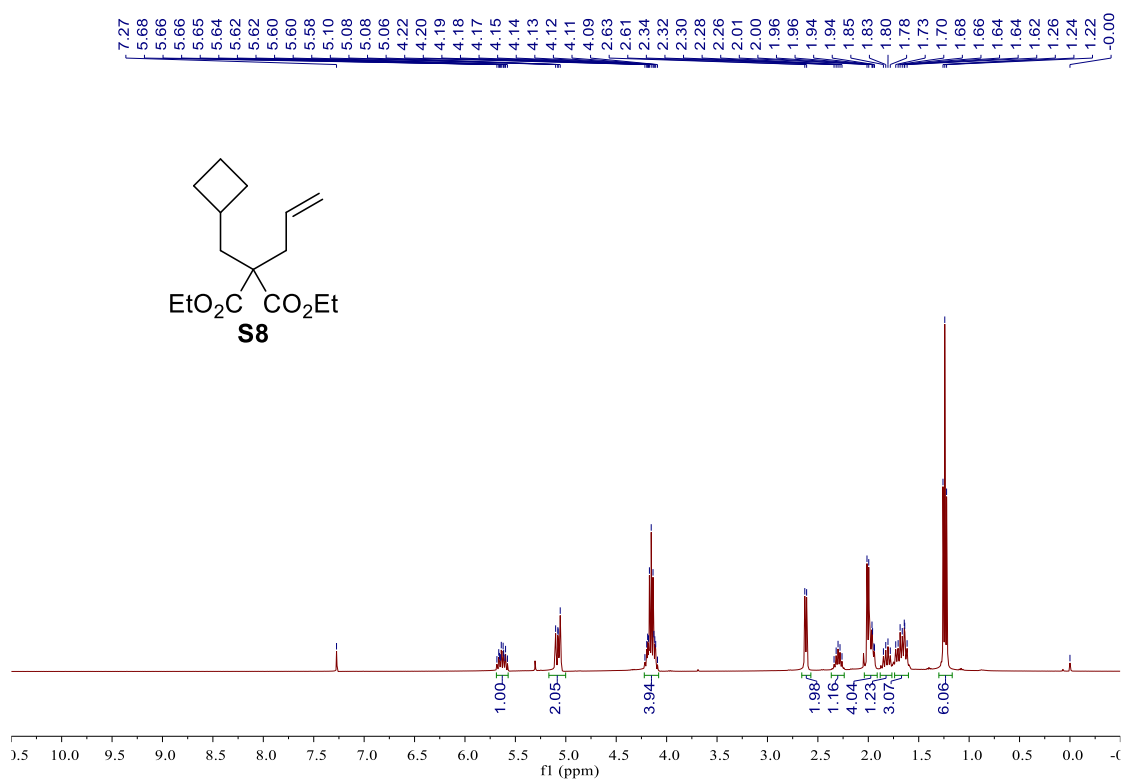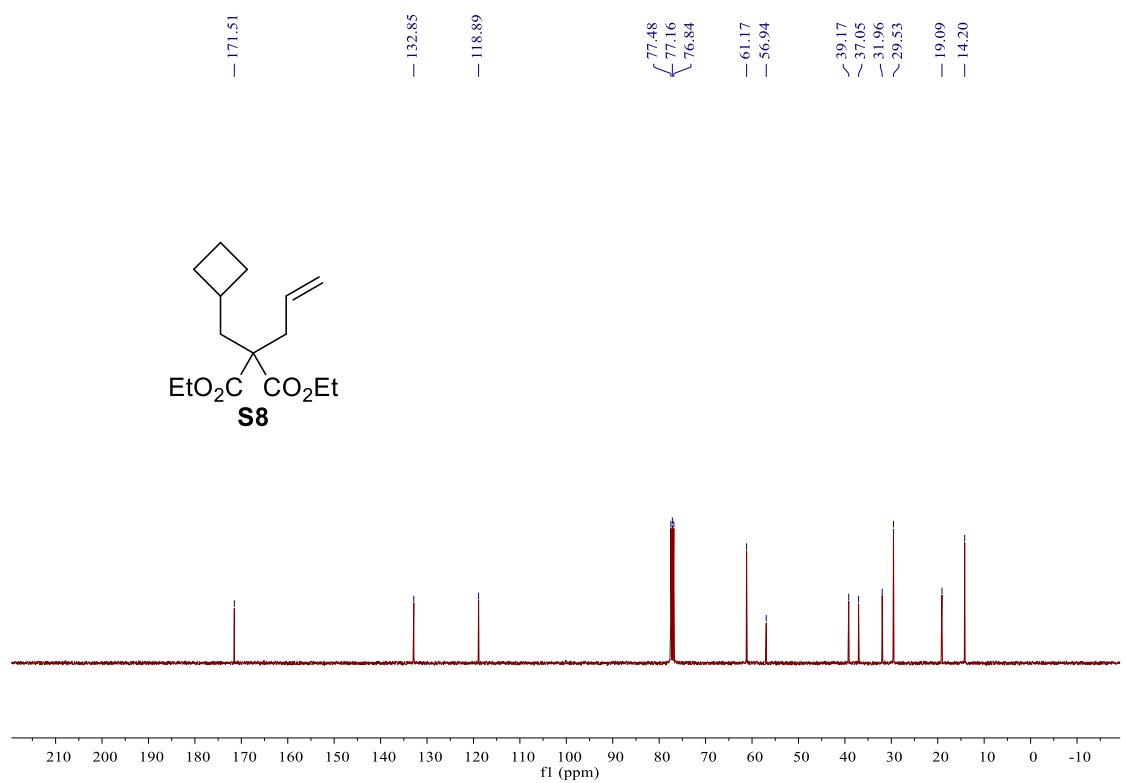

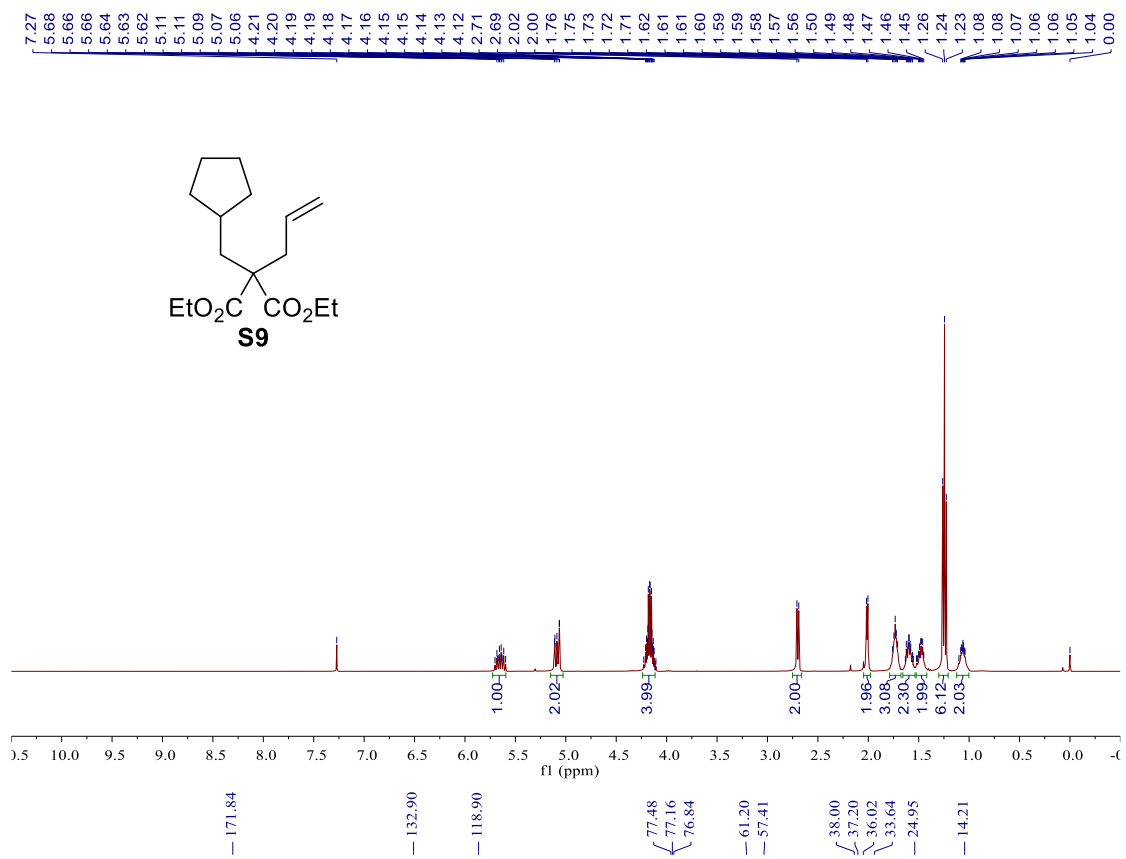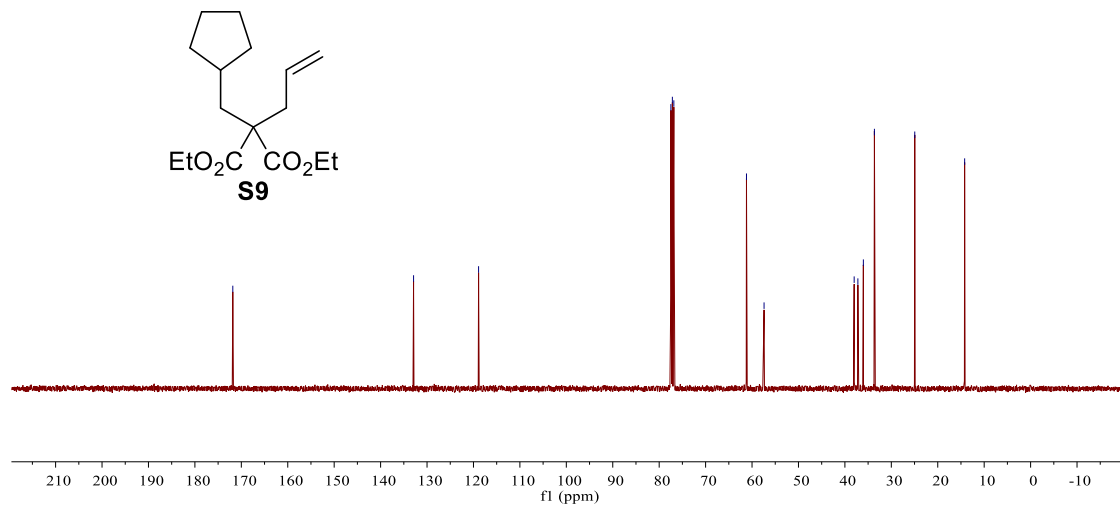

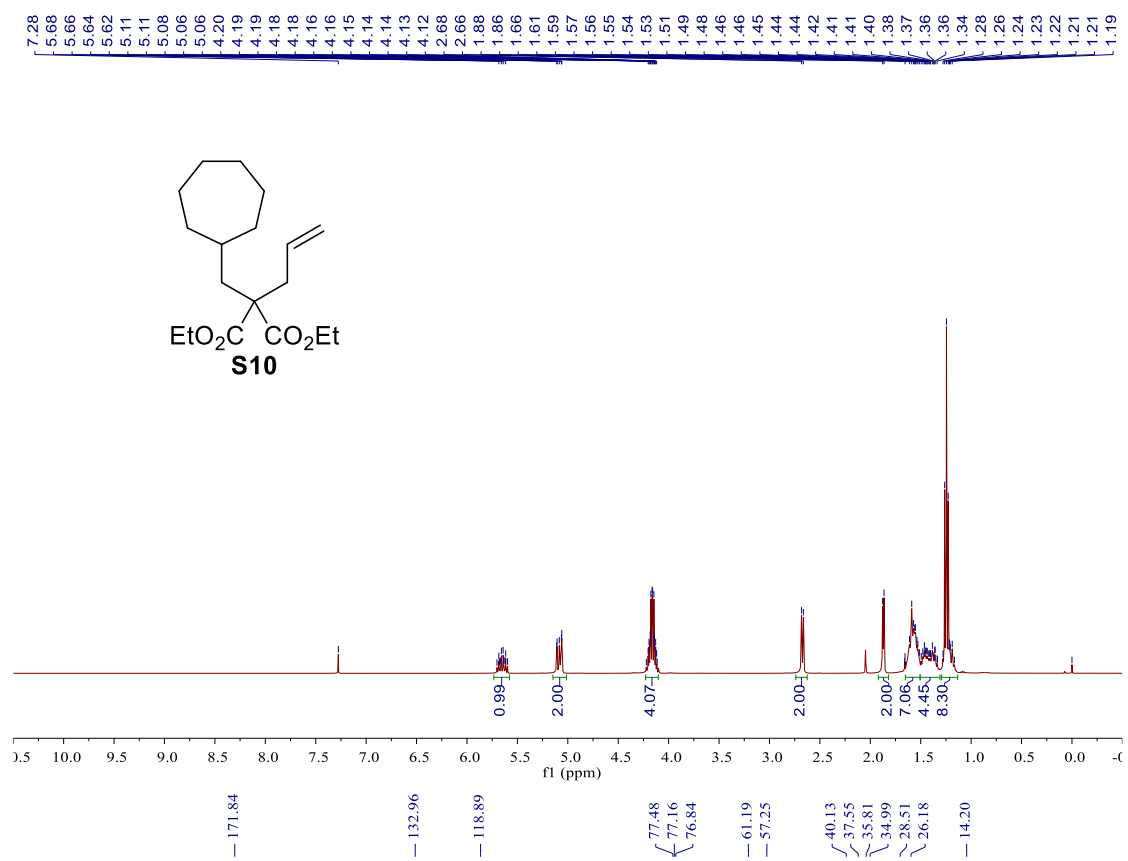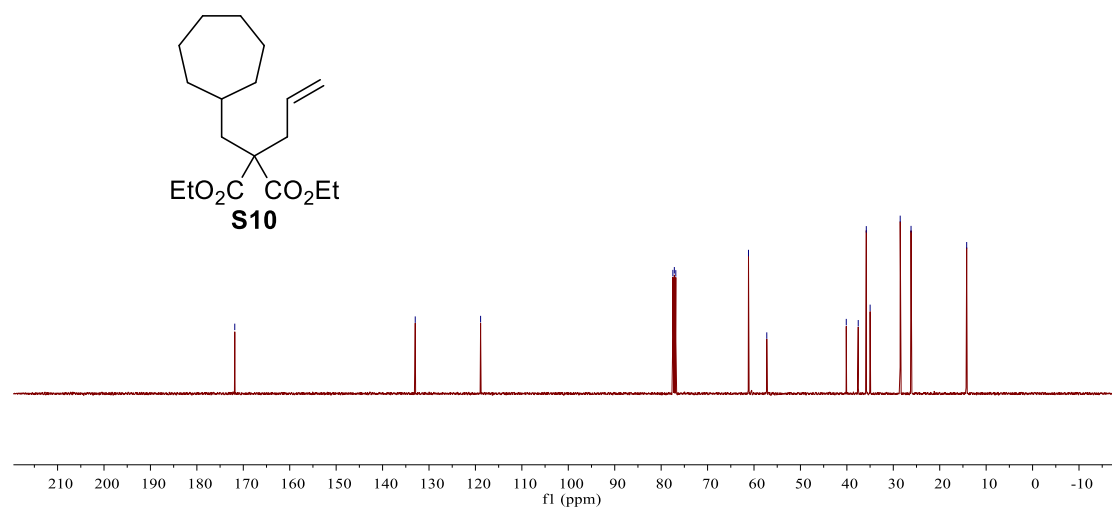

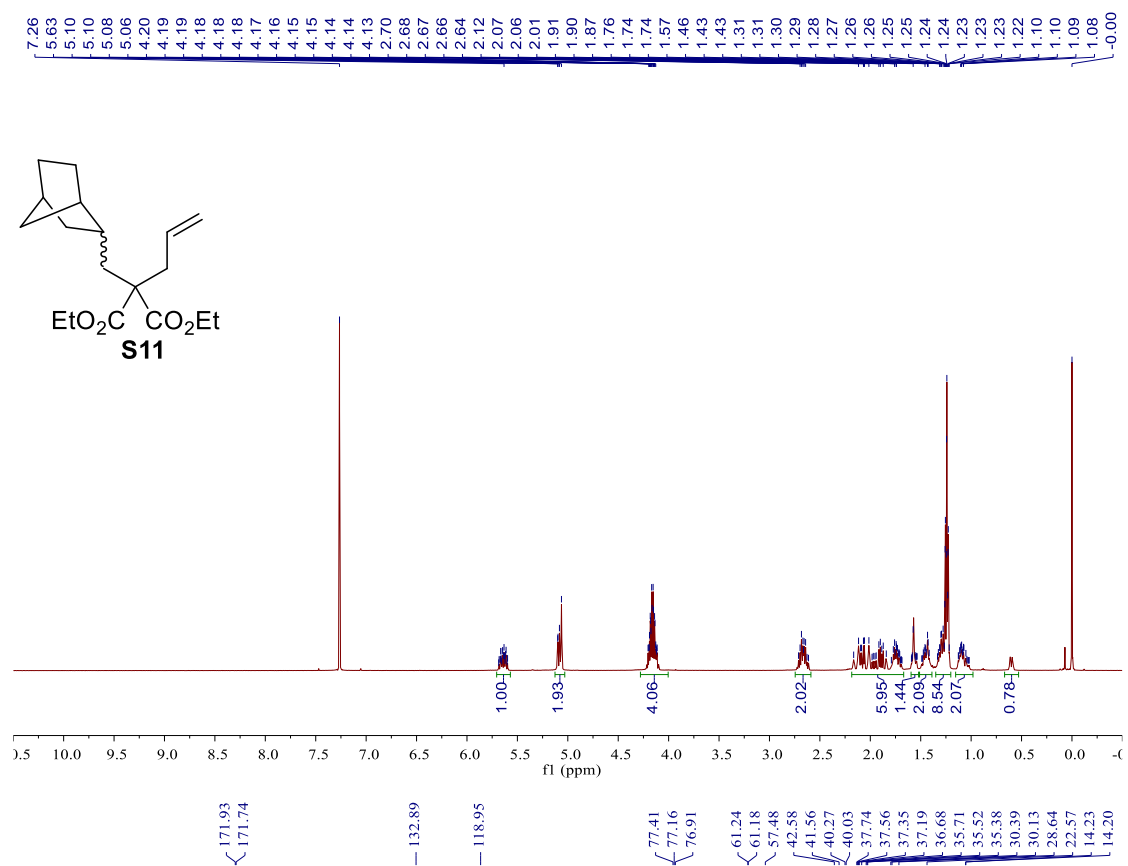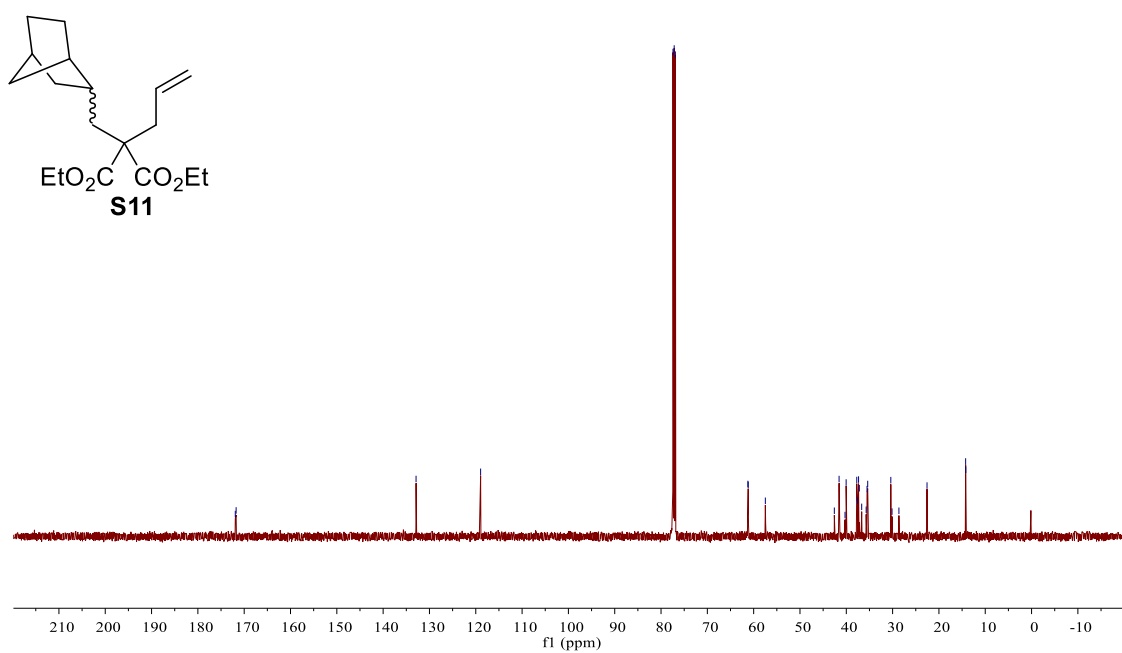

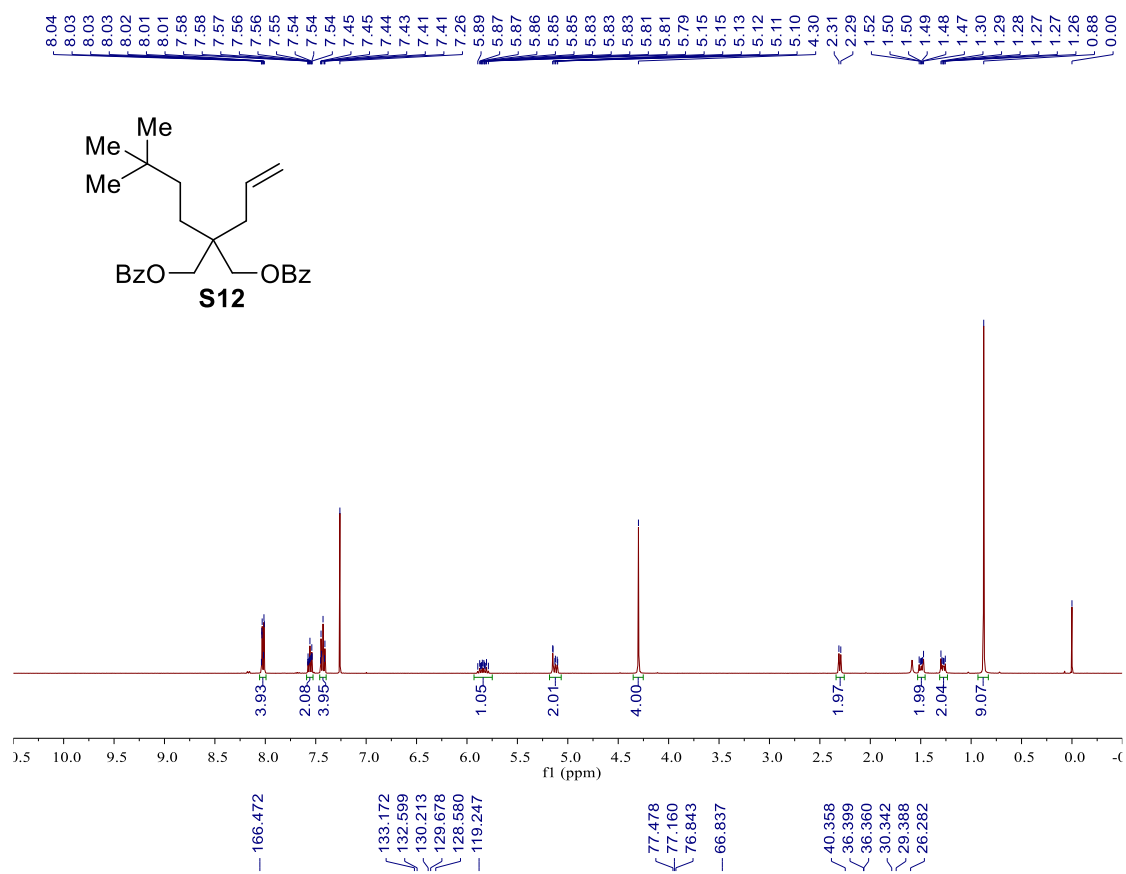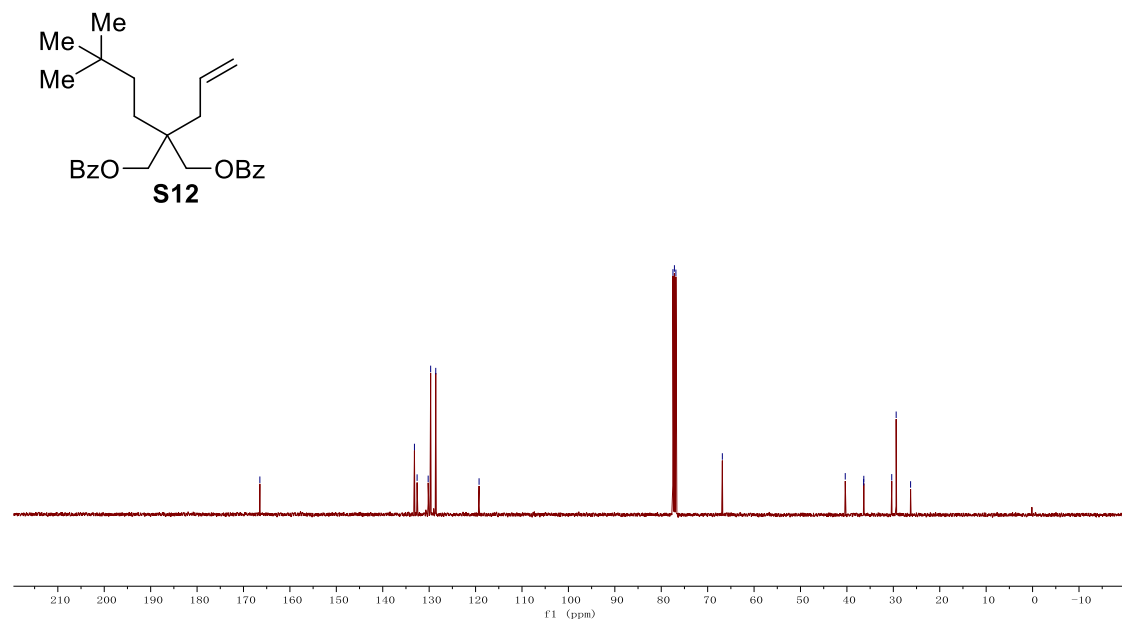

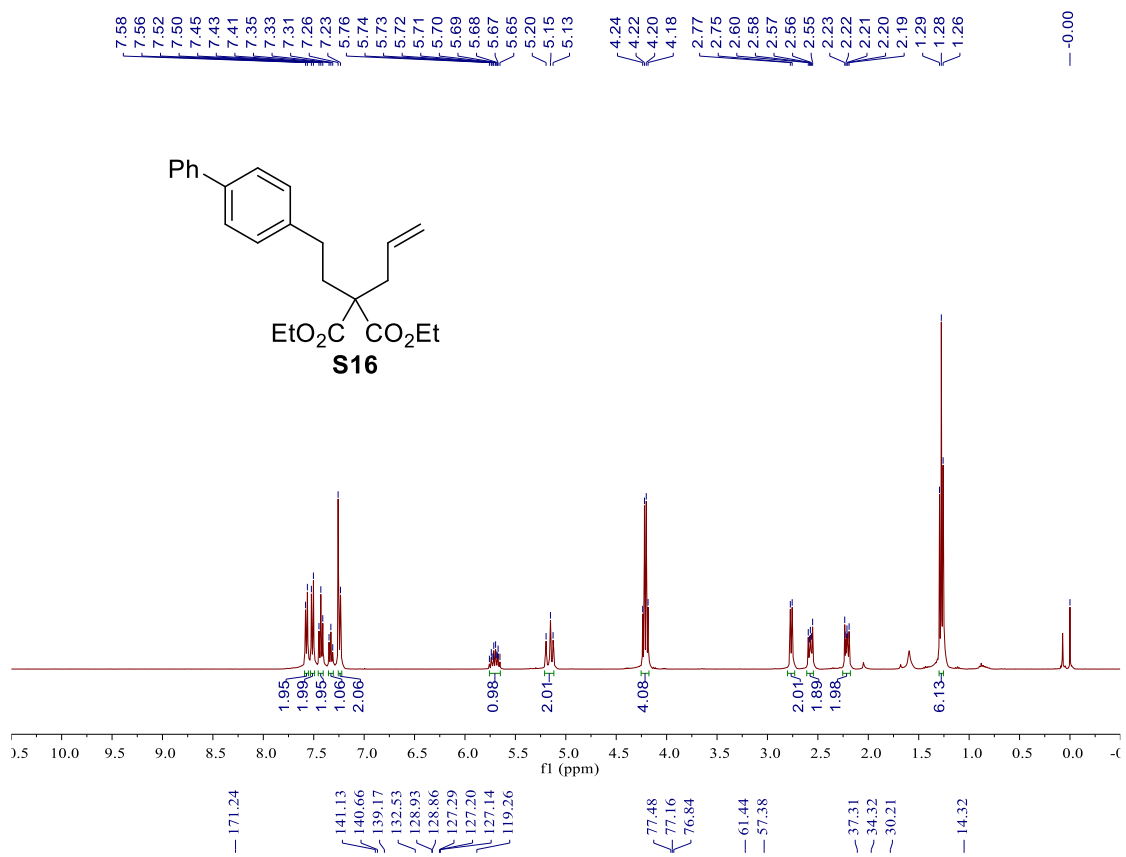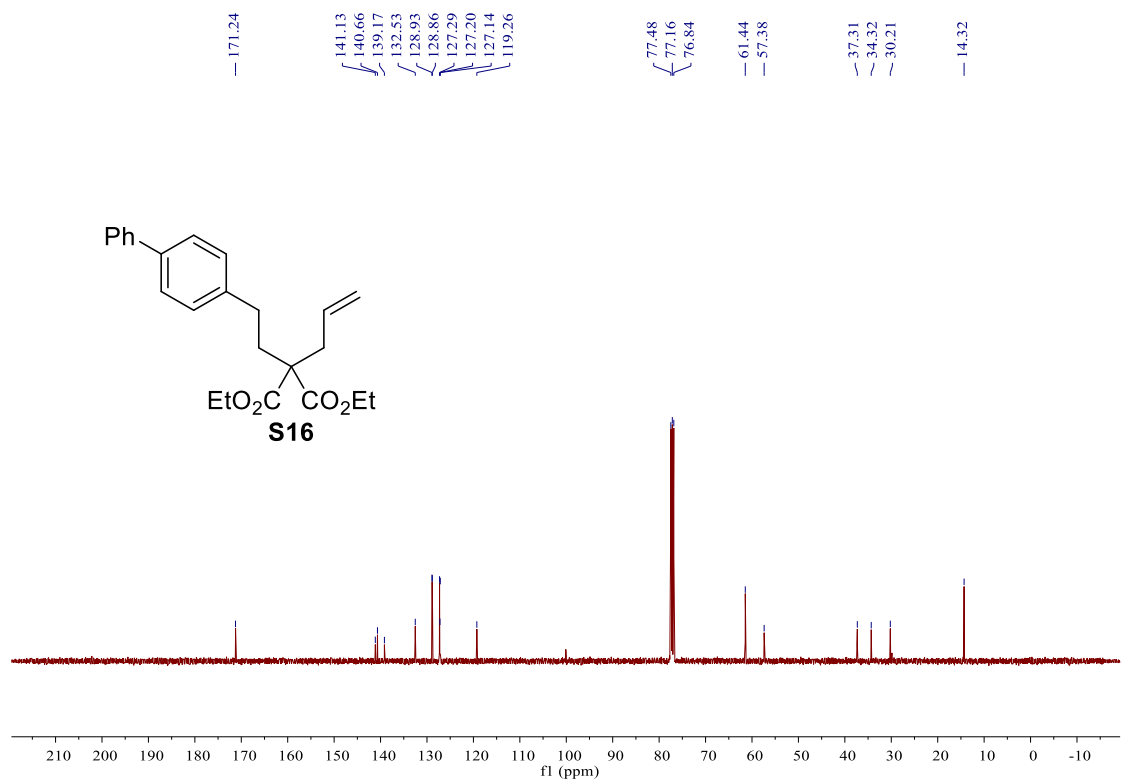

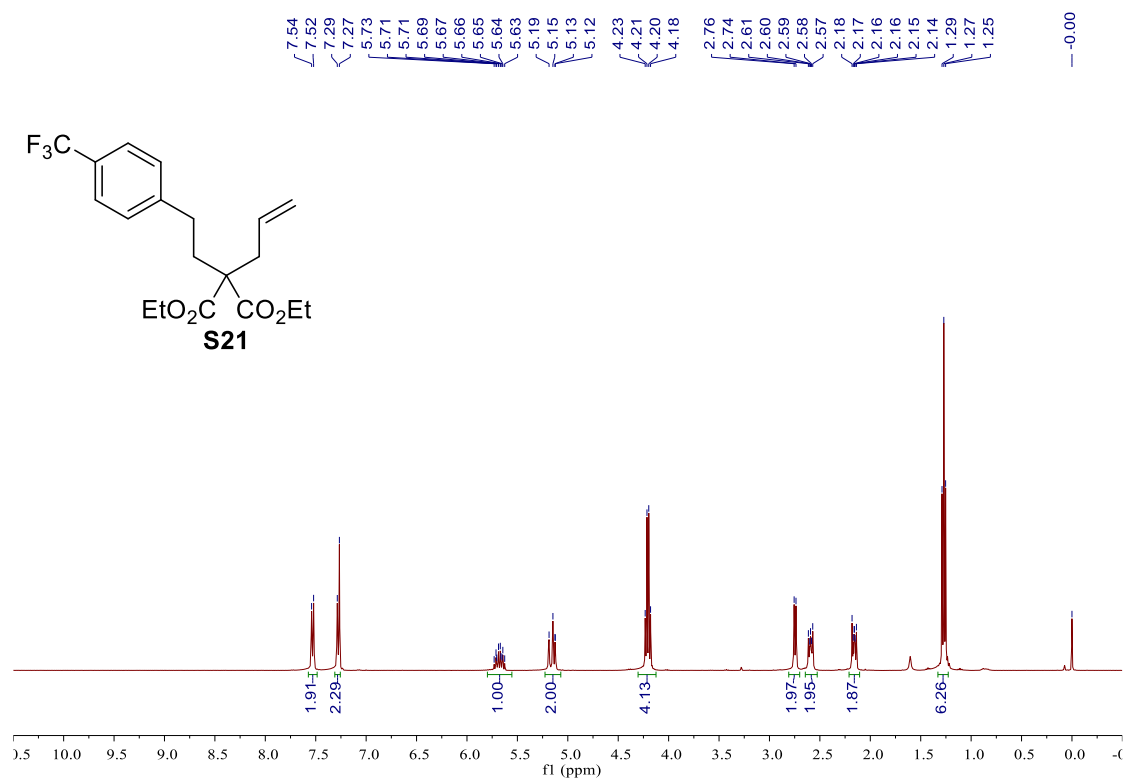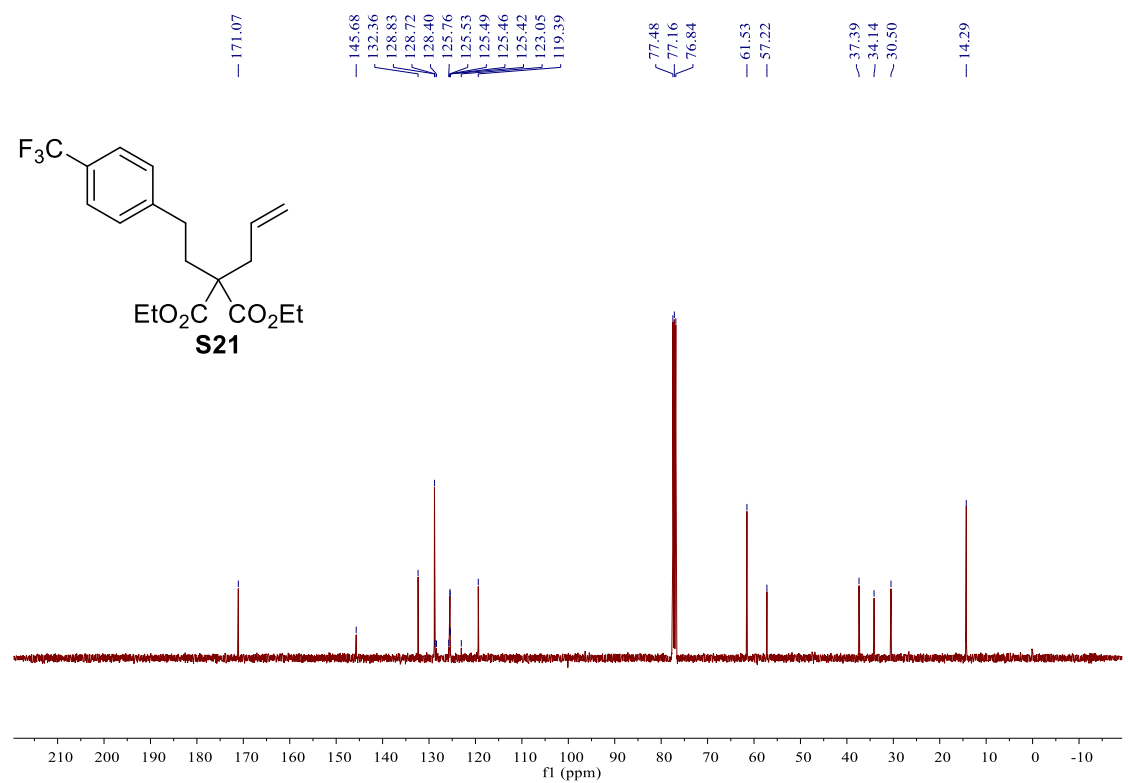

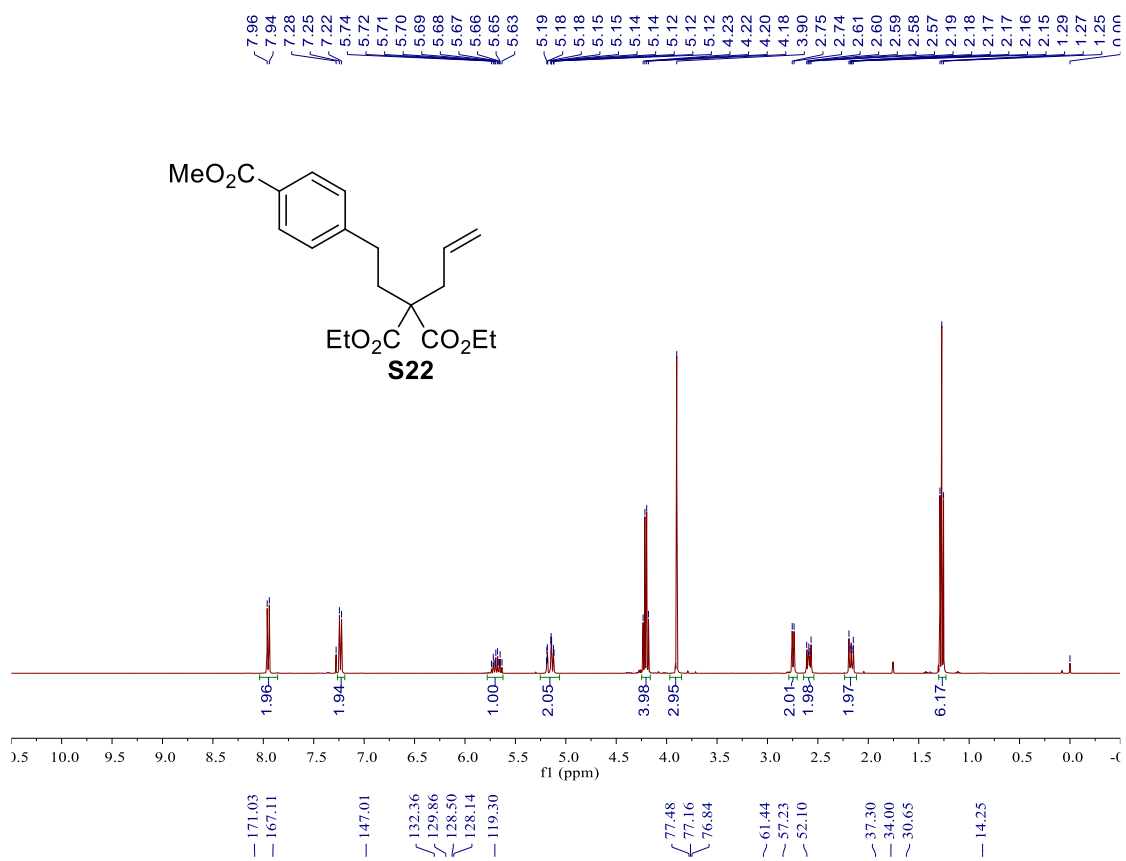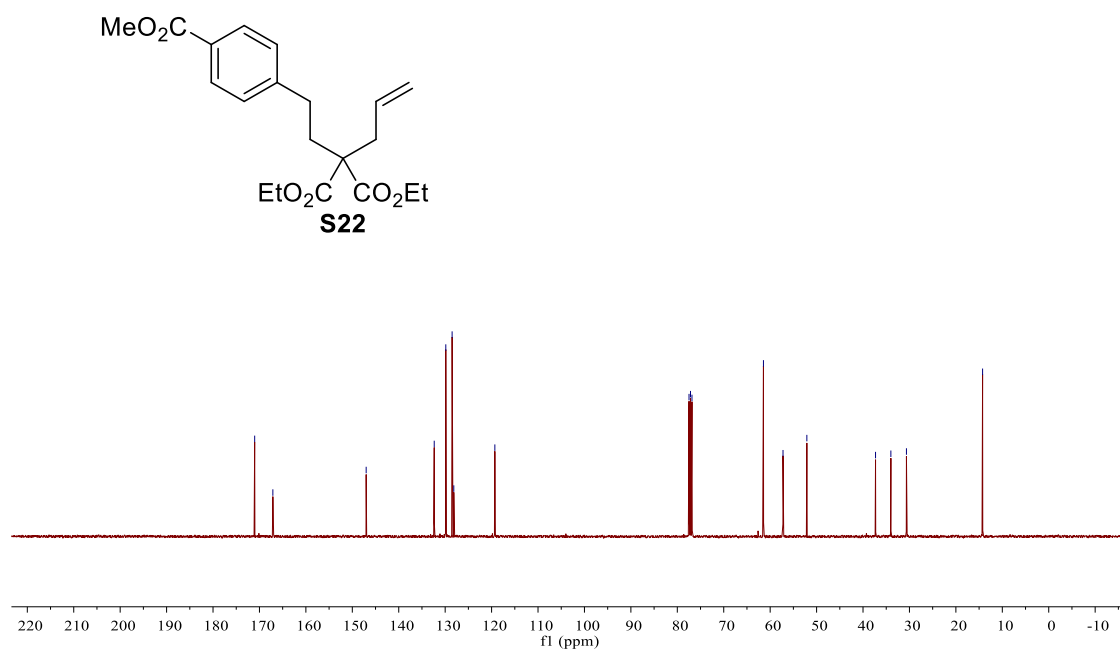



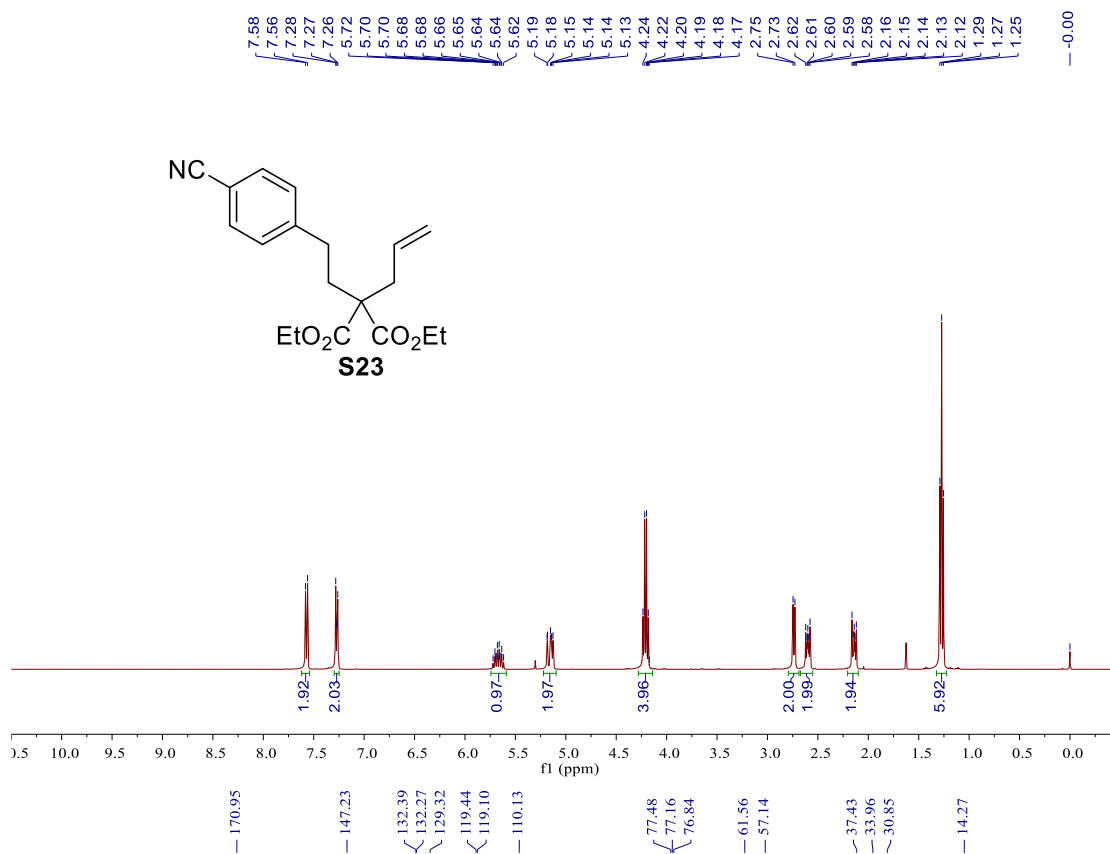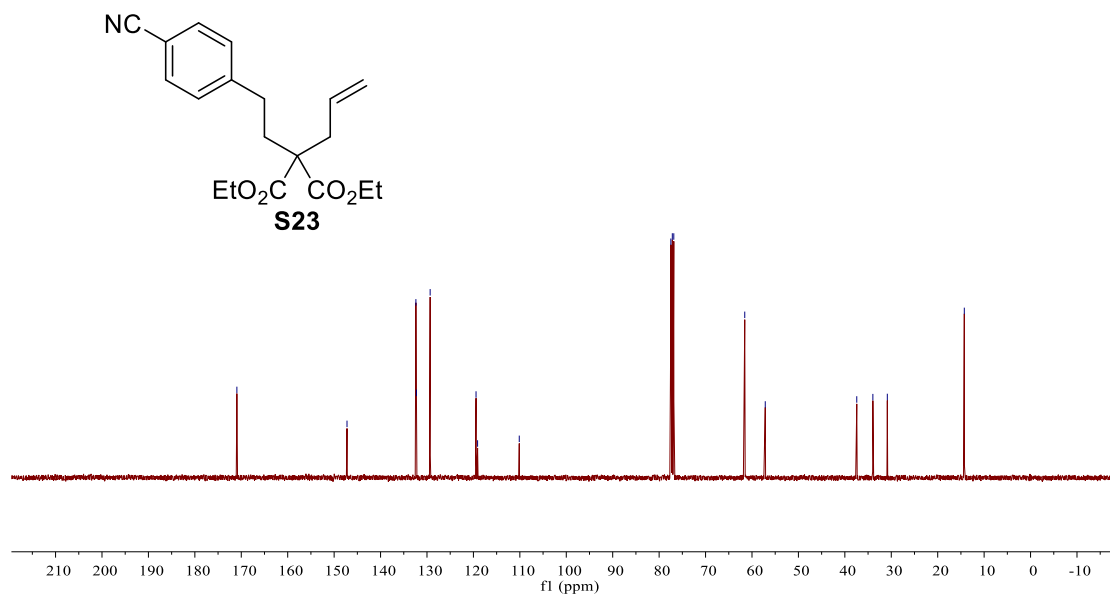

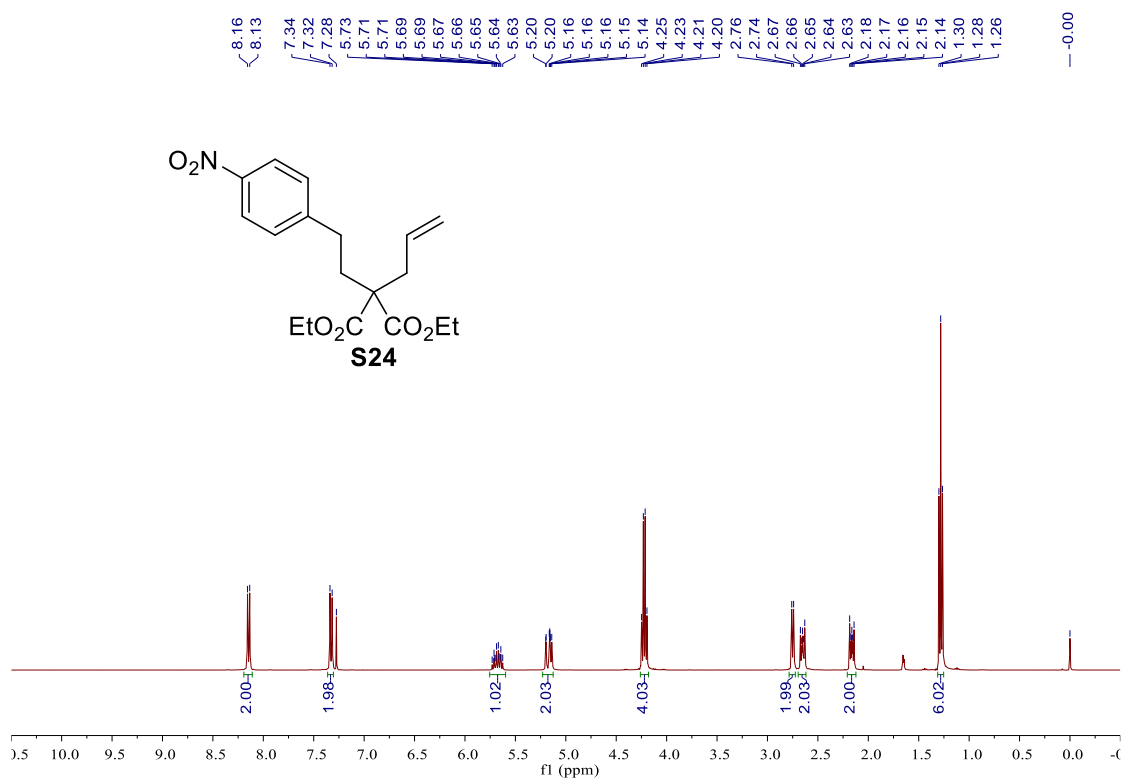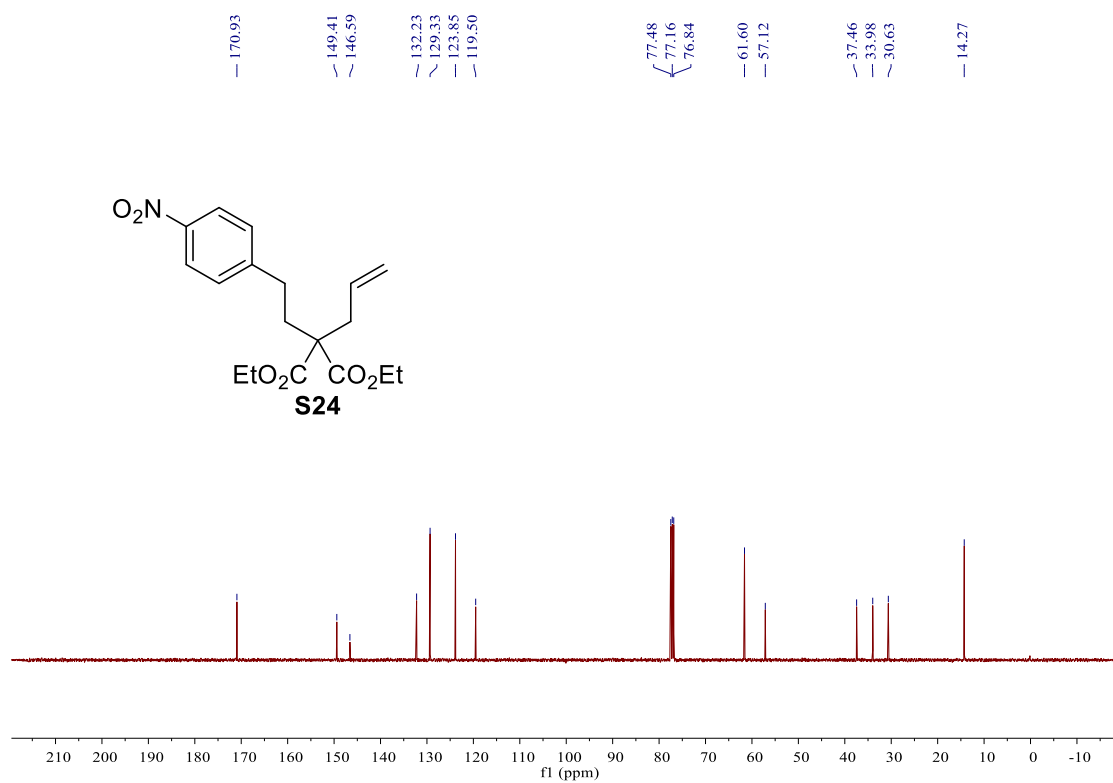

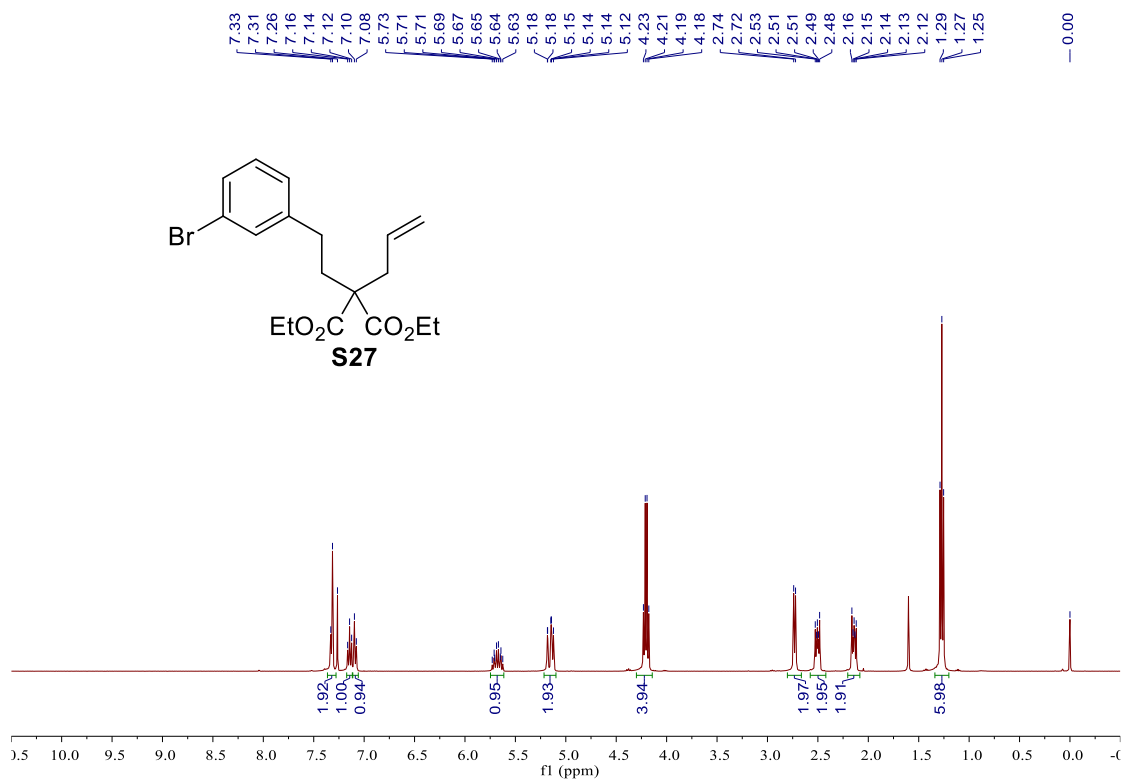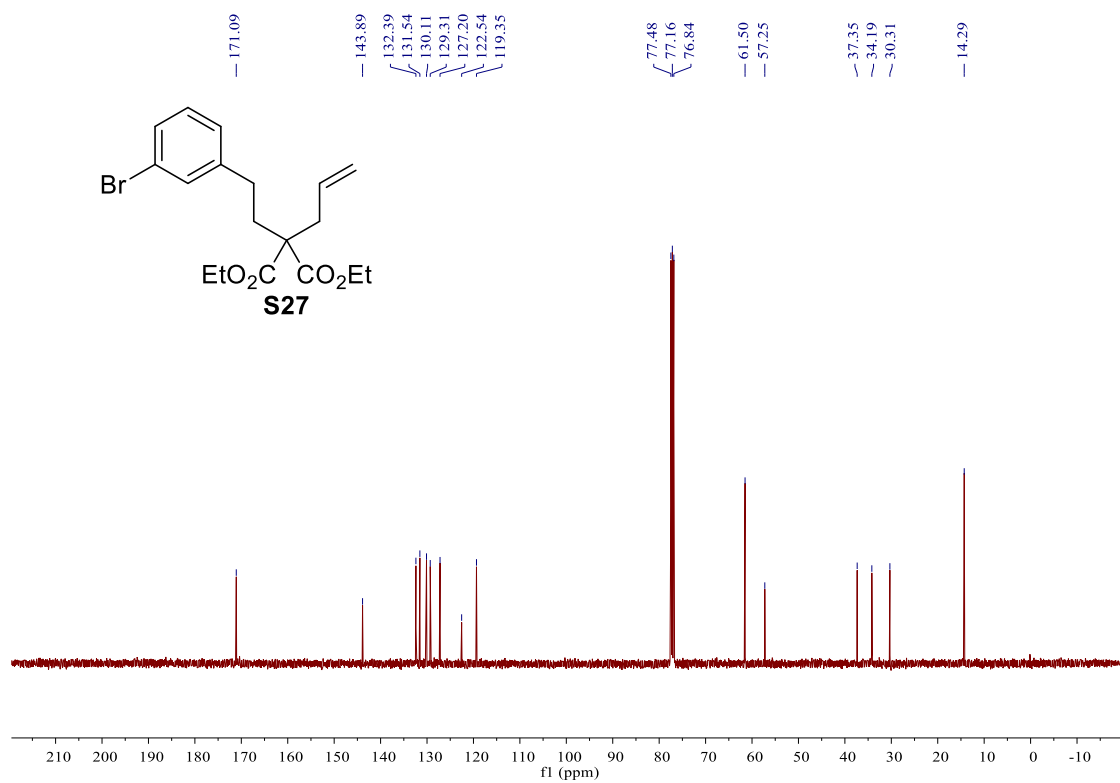

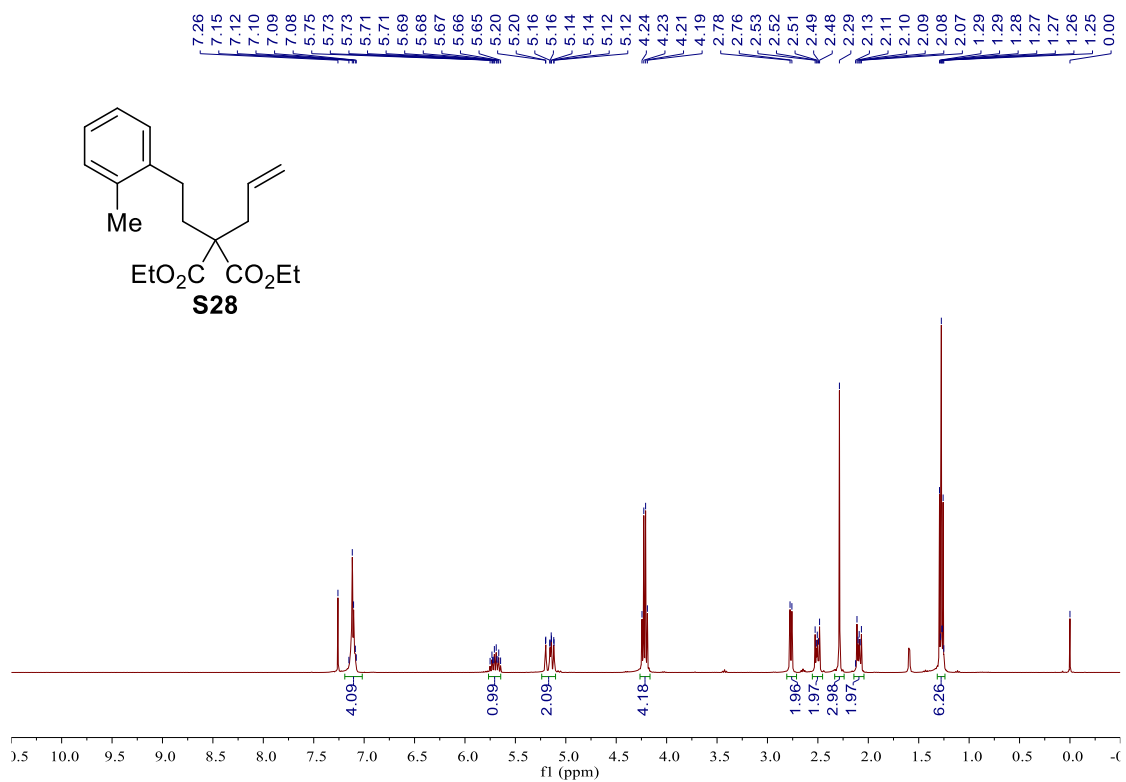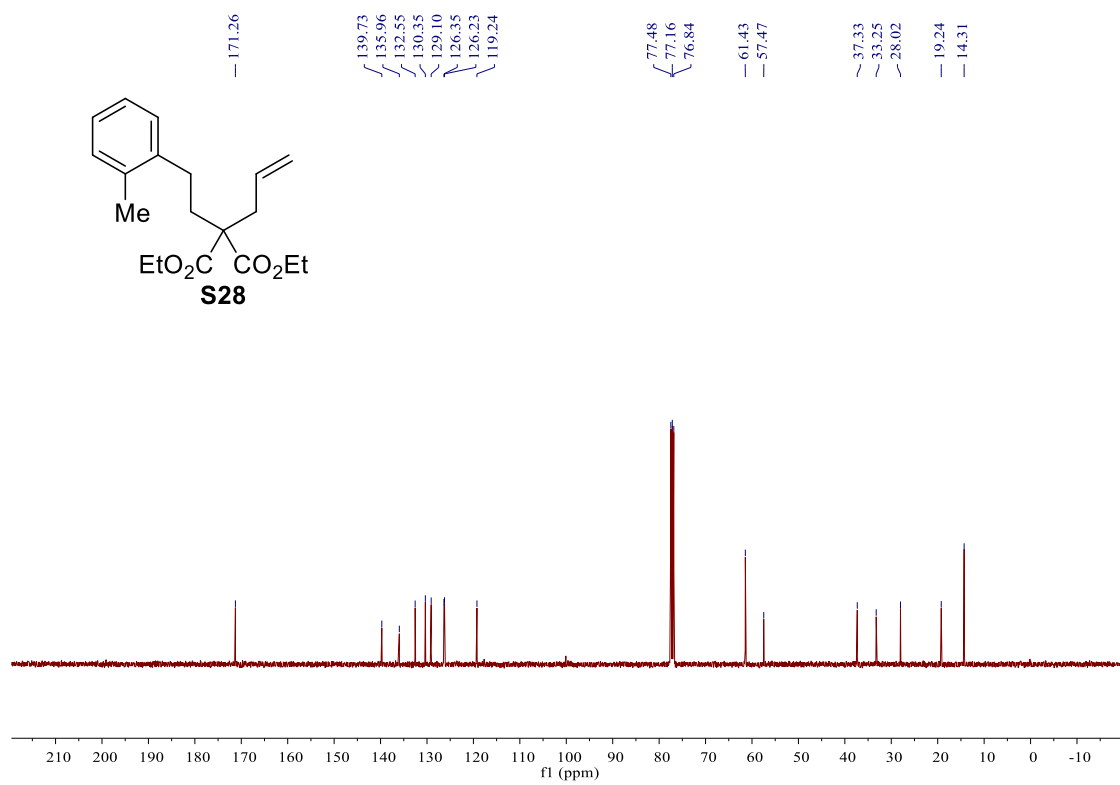

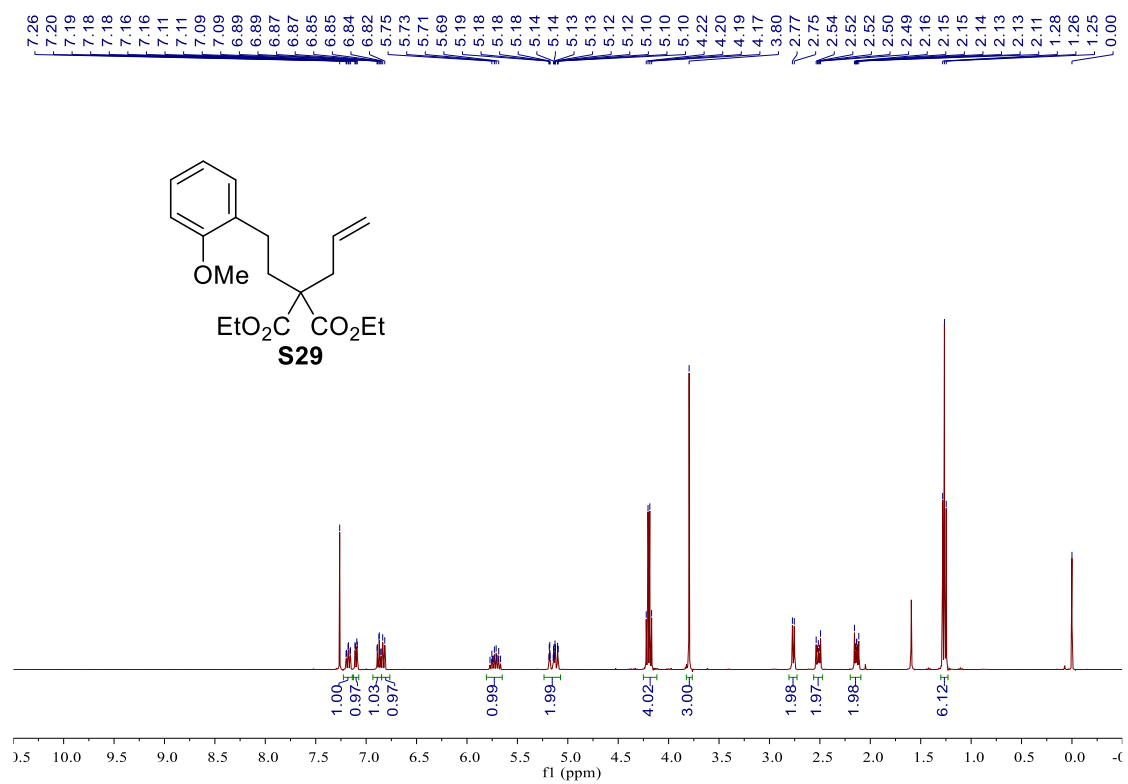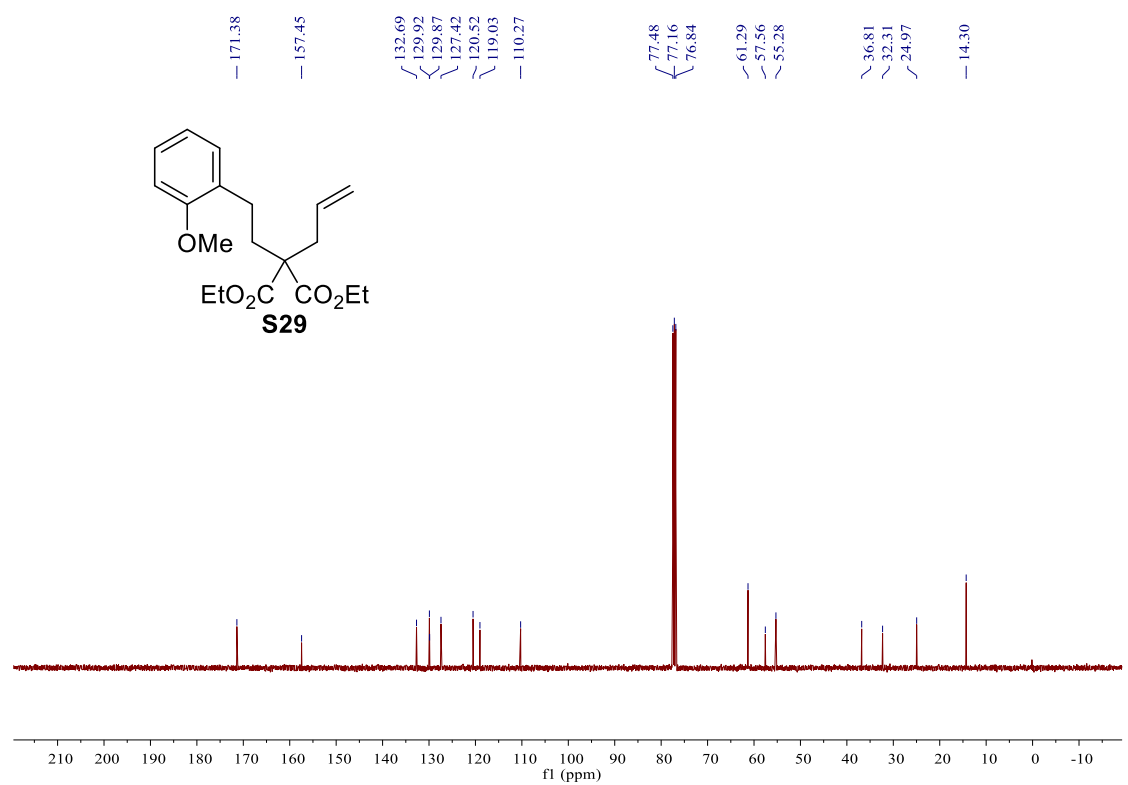

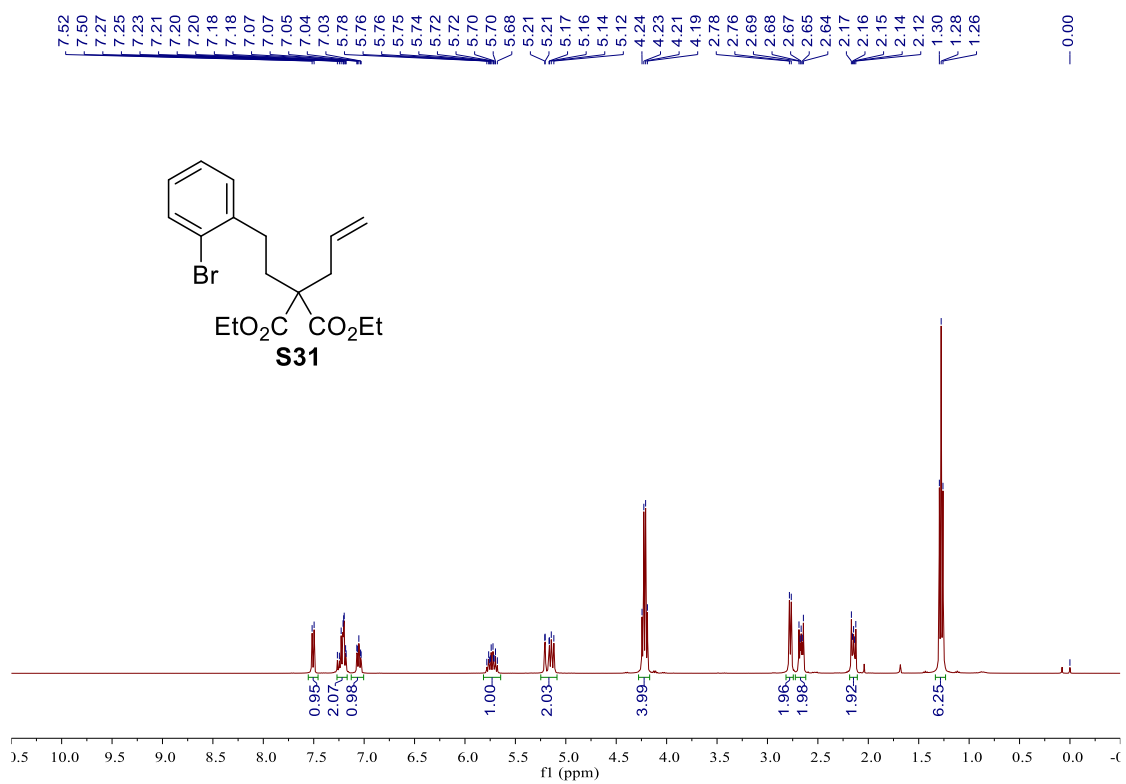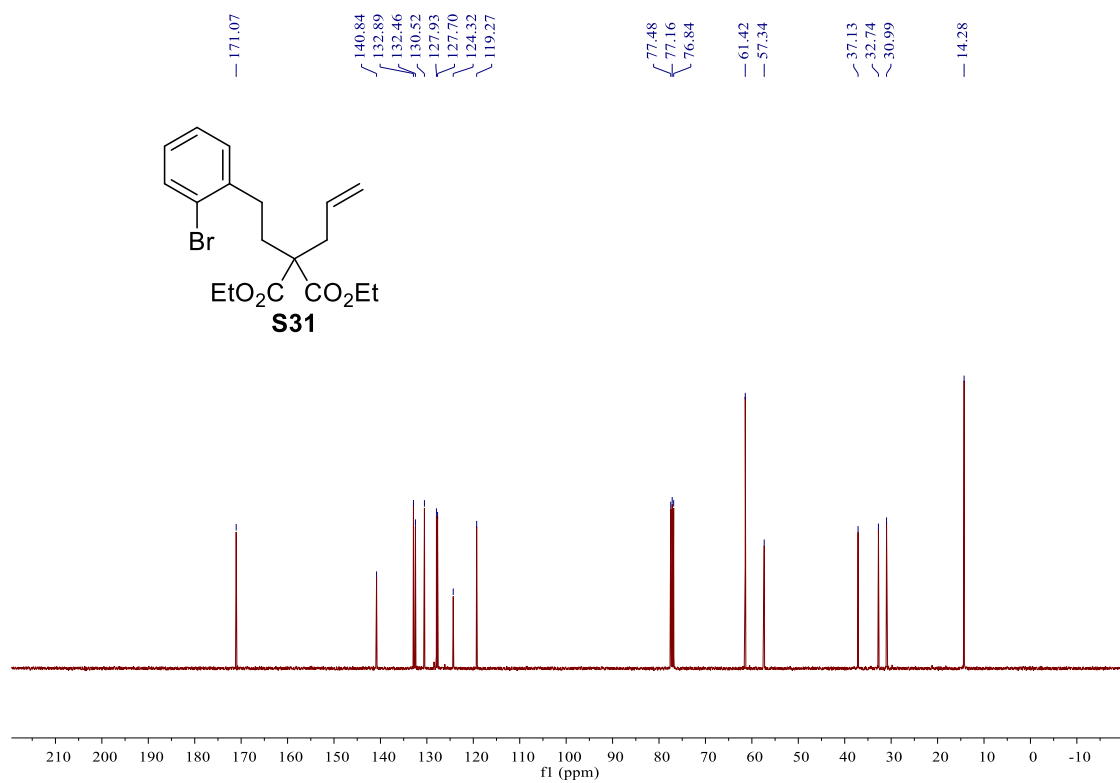

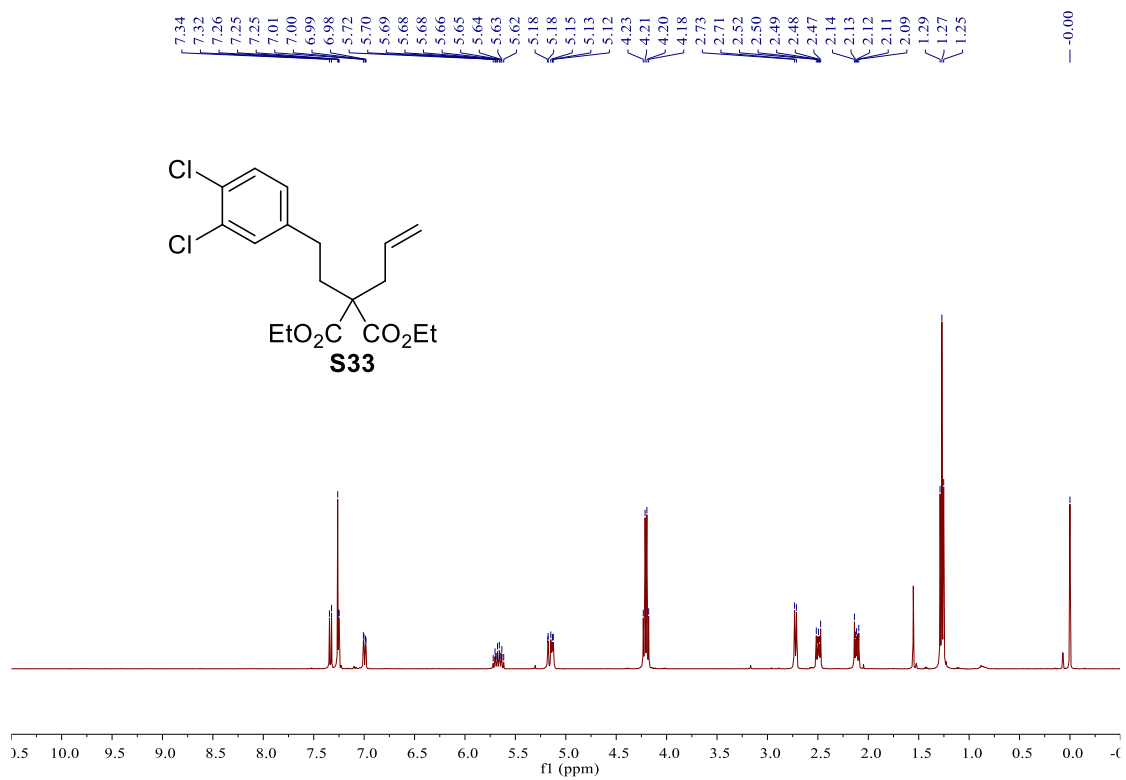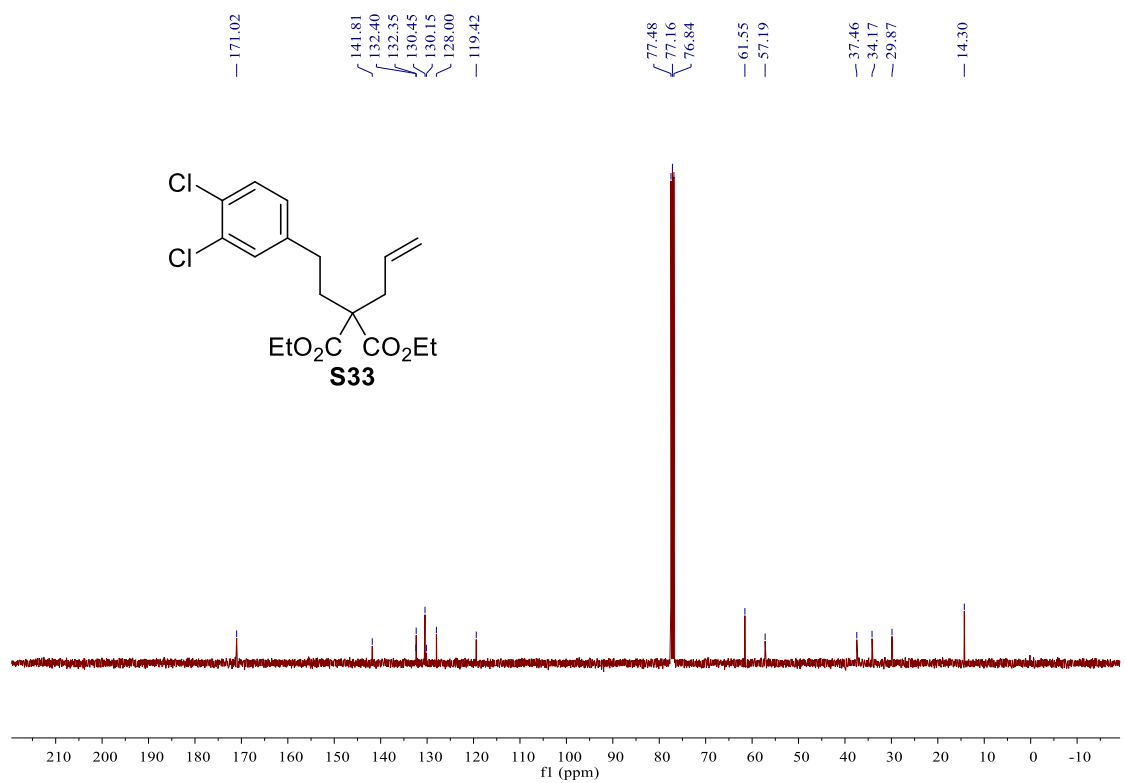

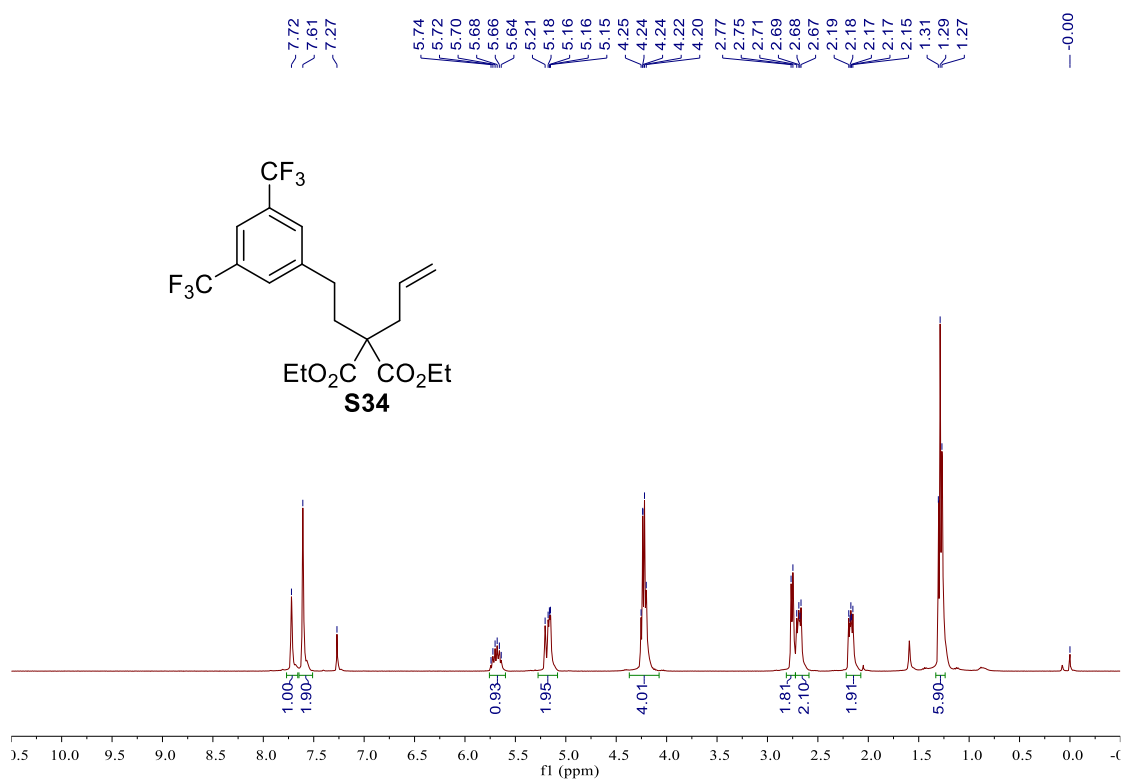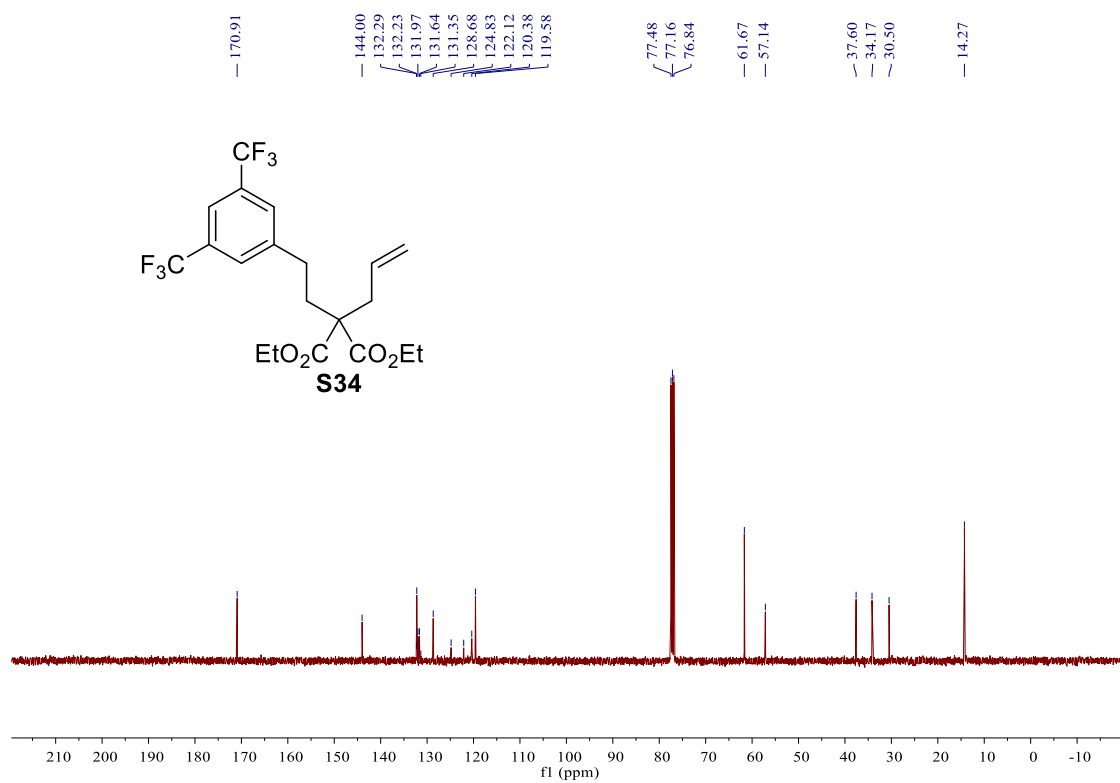



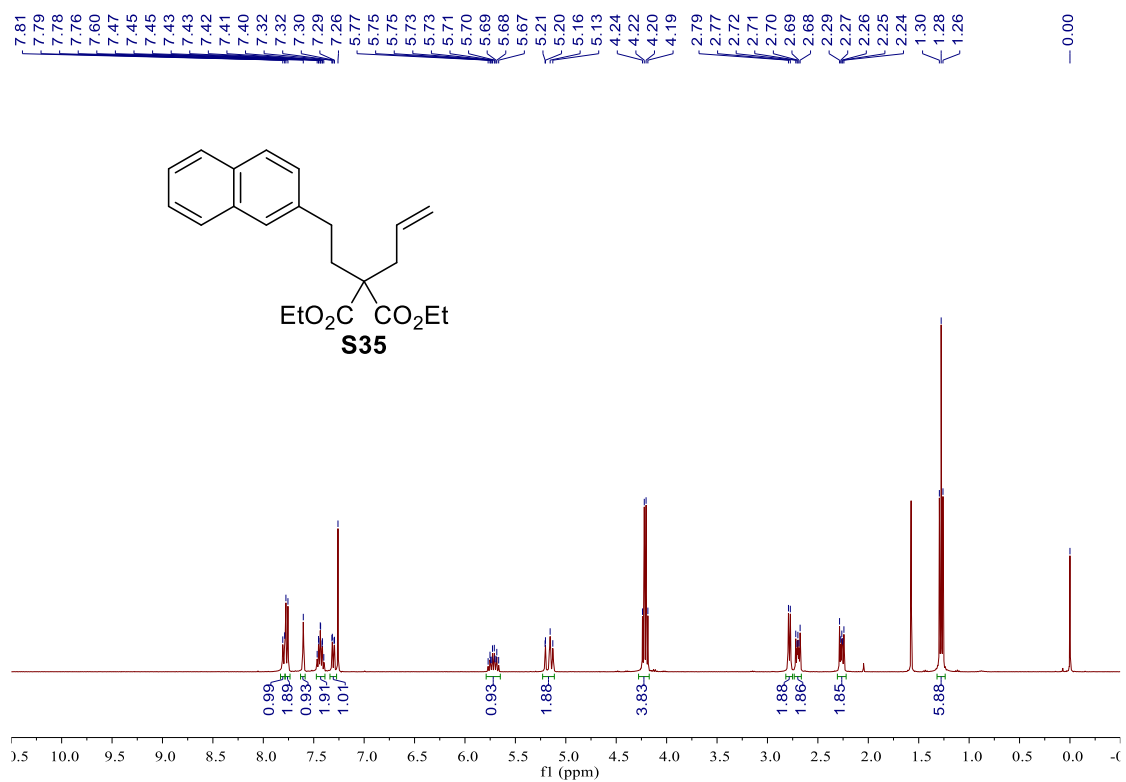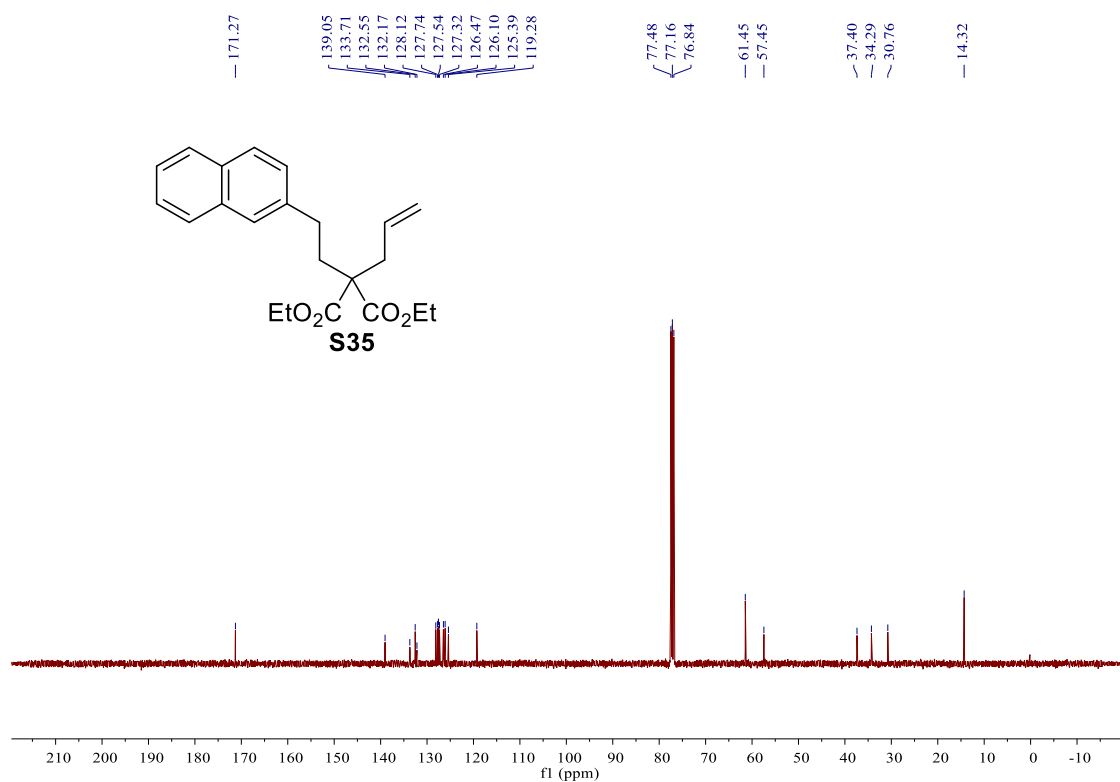

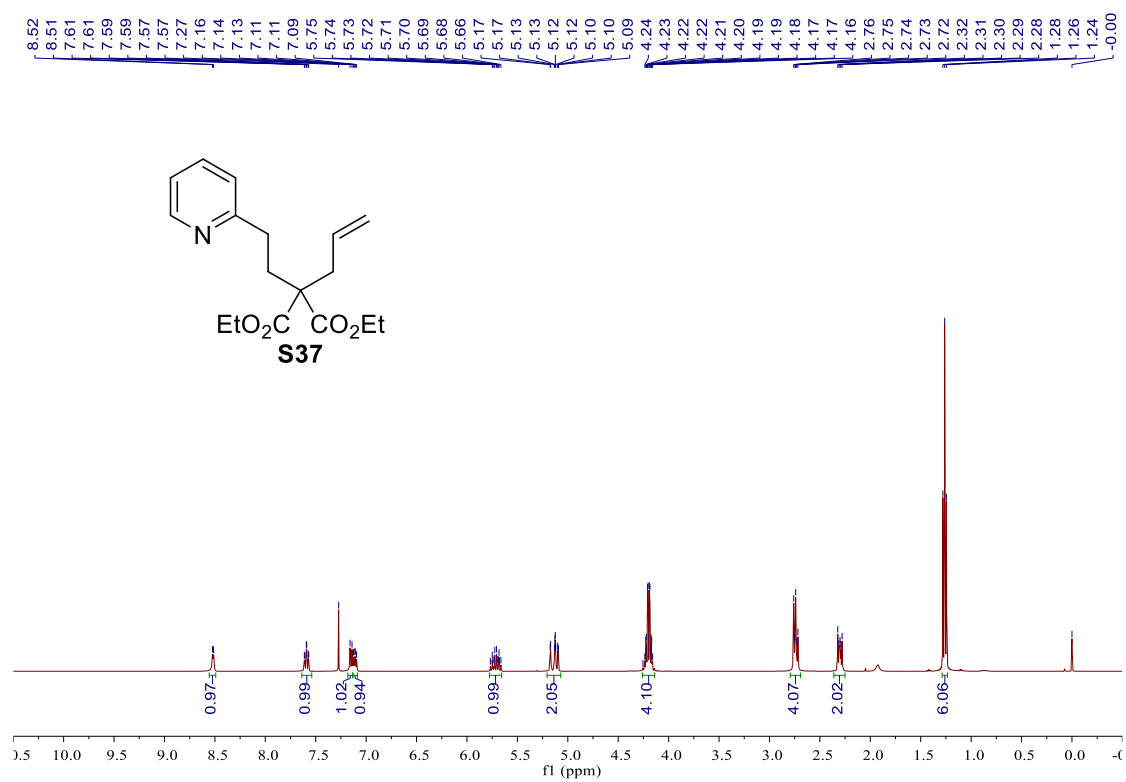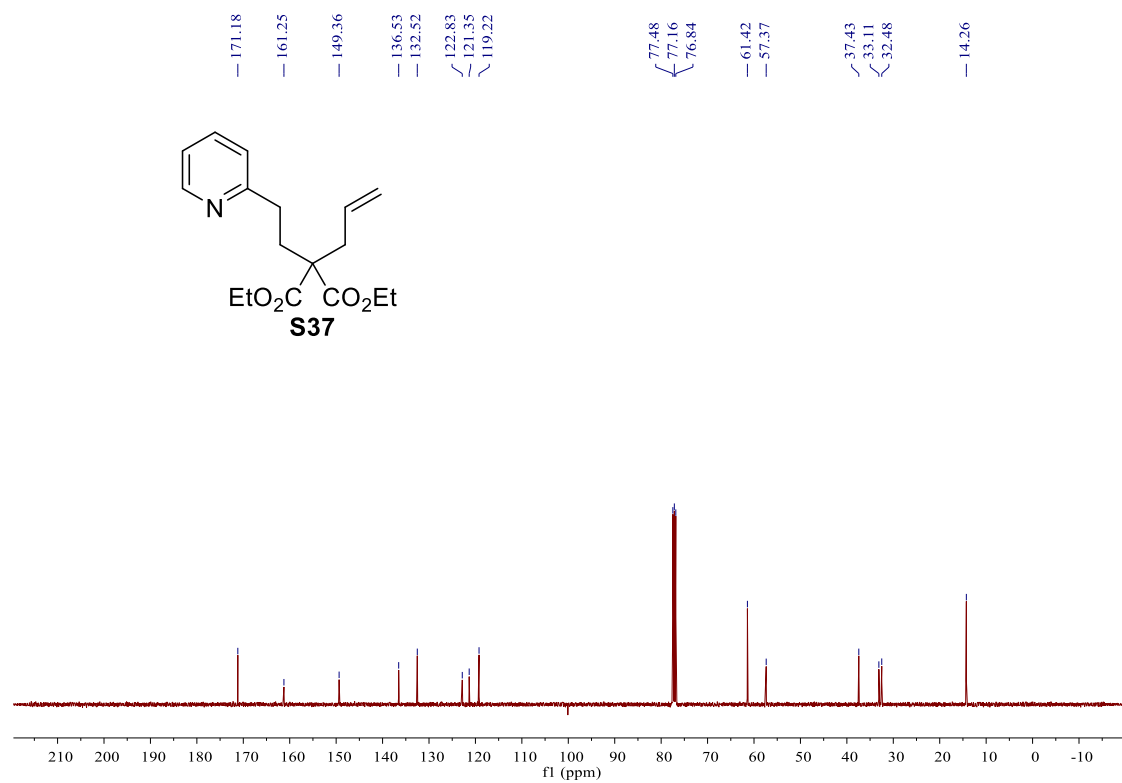

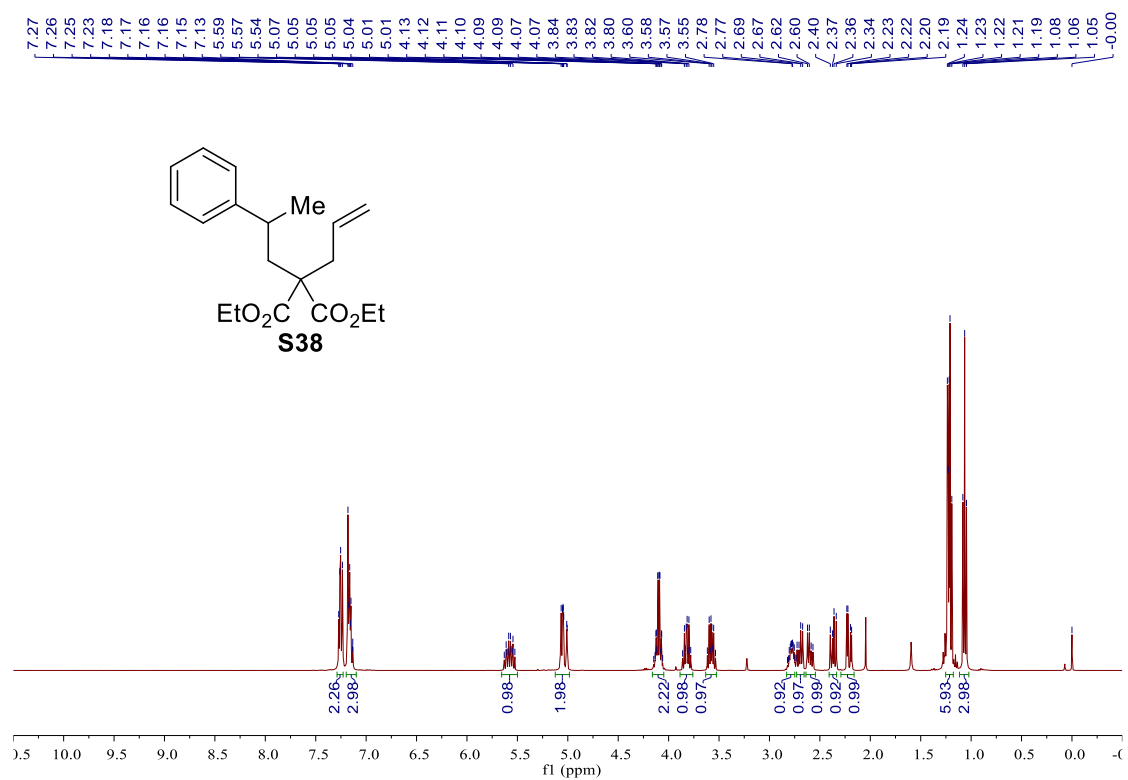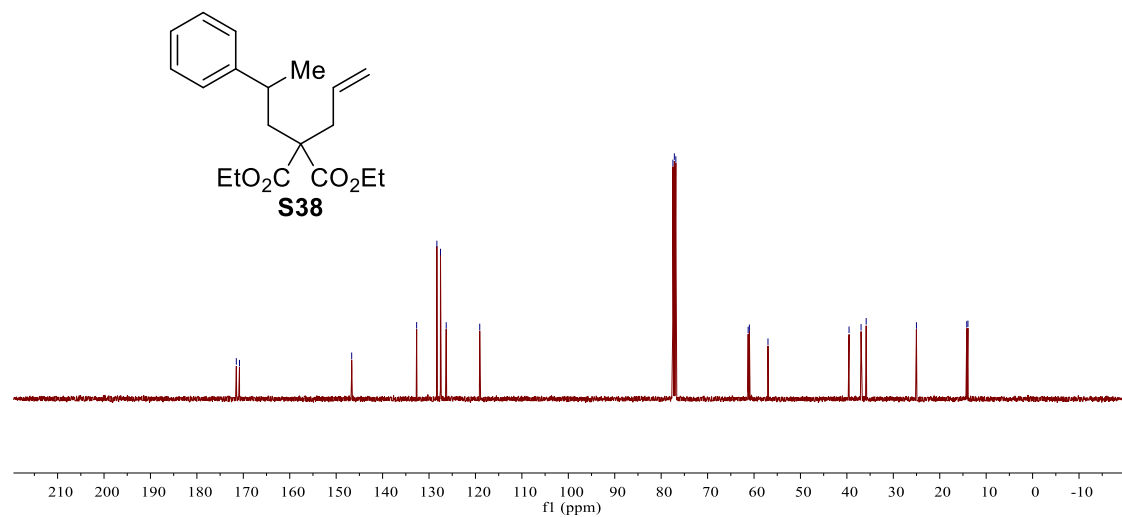

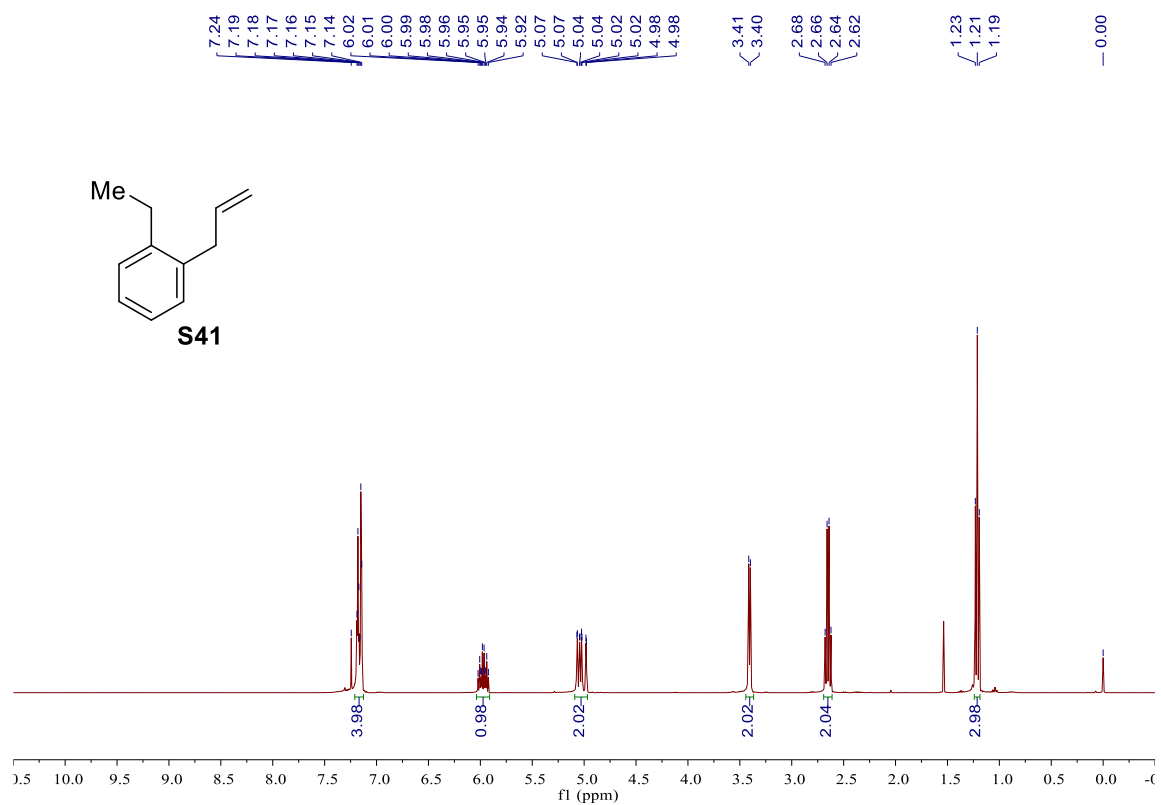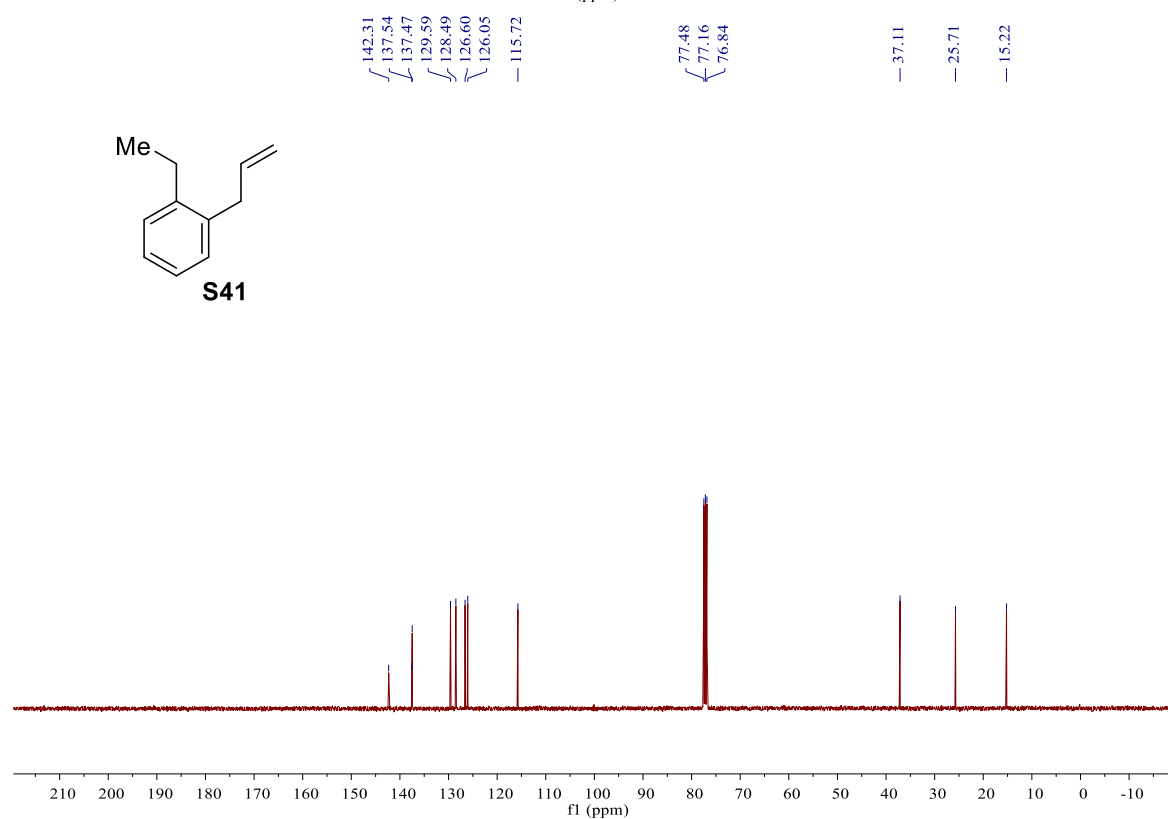

BKJ-200902-2. 1. 1. 1r

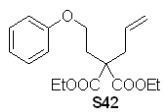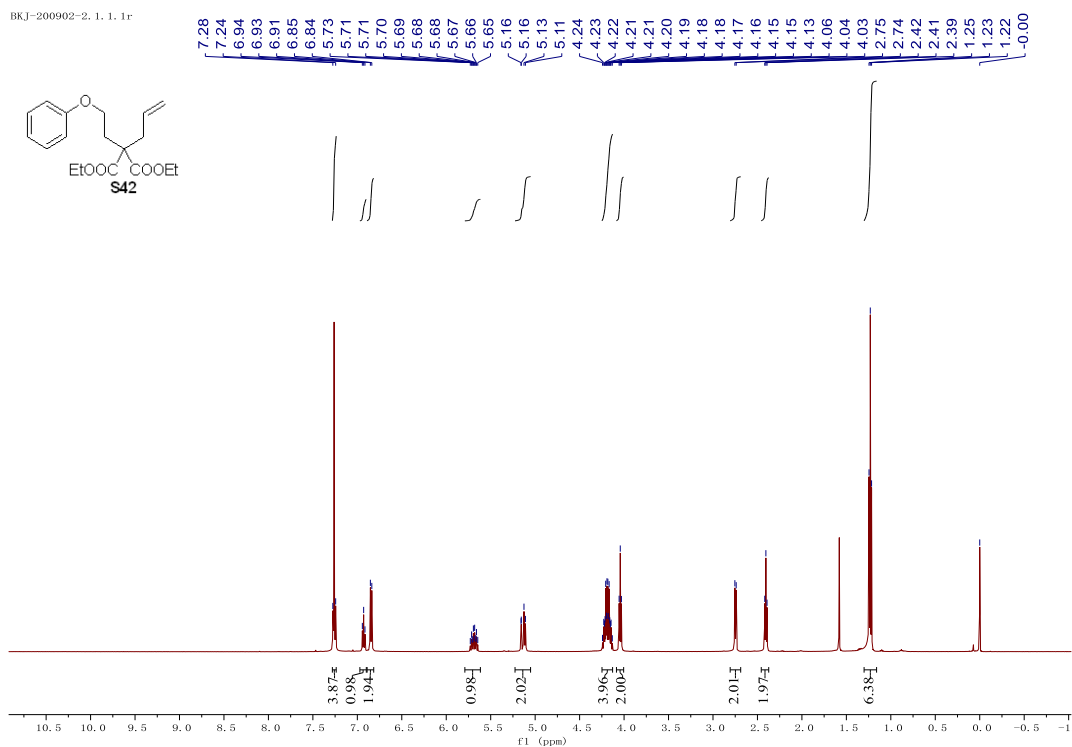

BKJ-200902-2. 2. 1. 1r

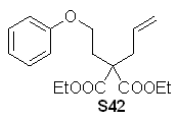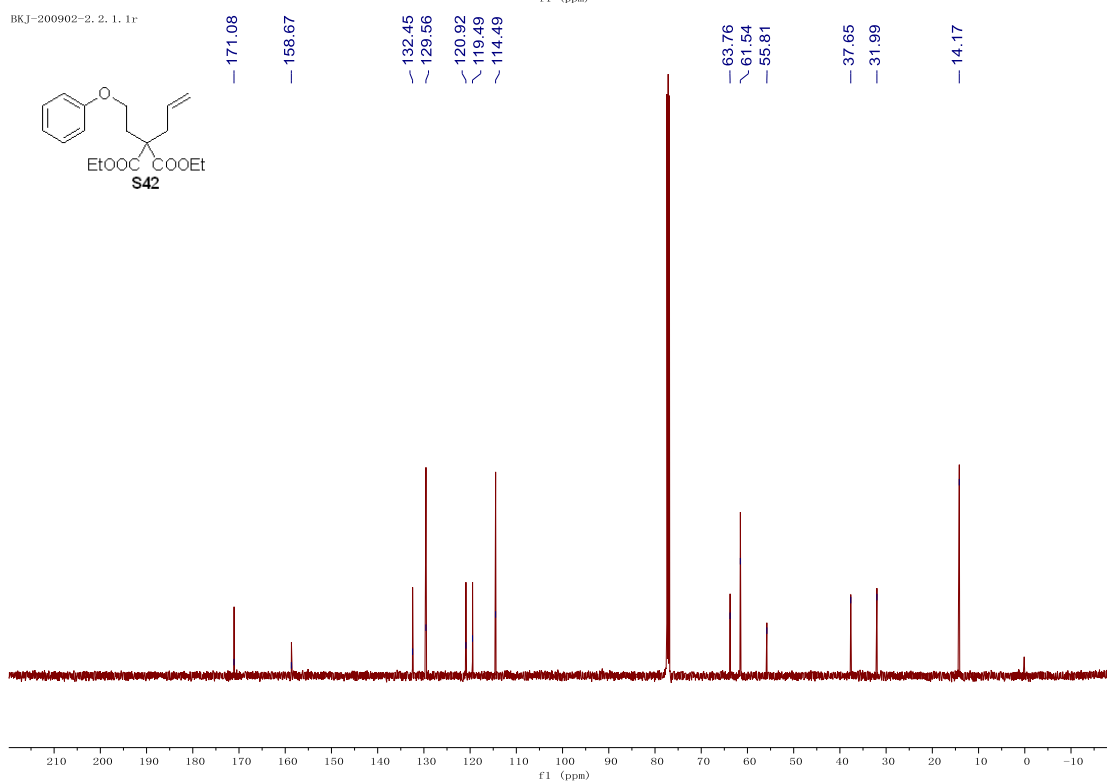

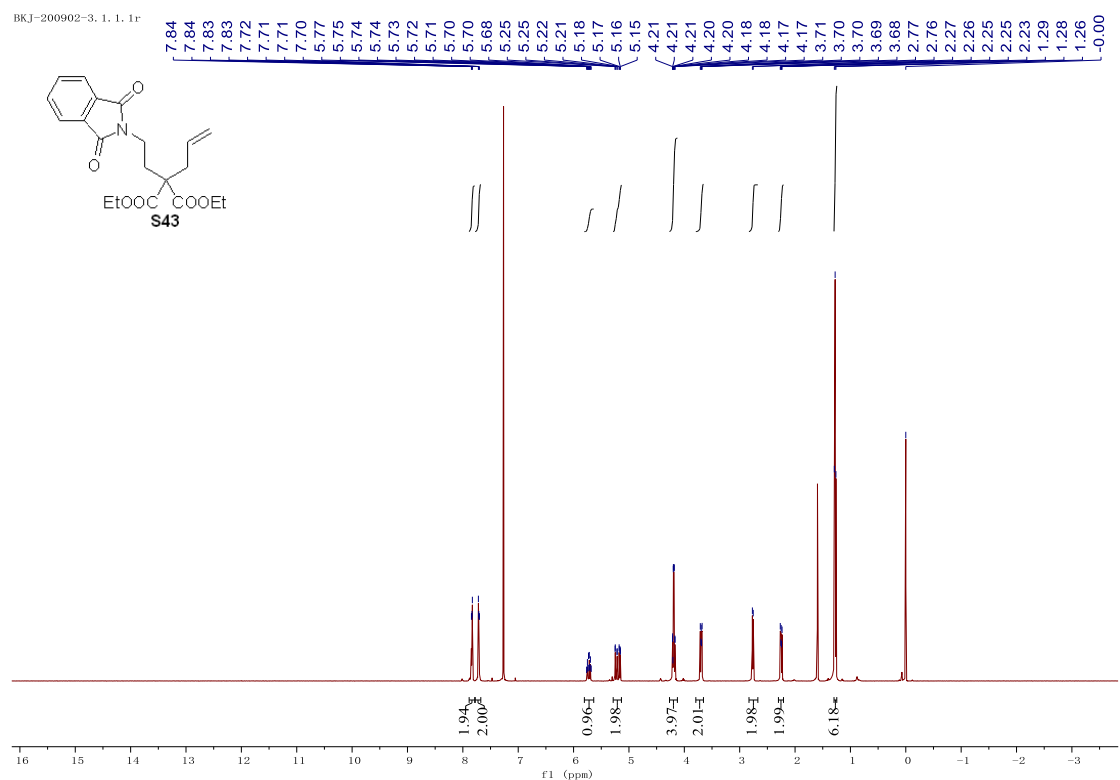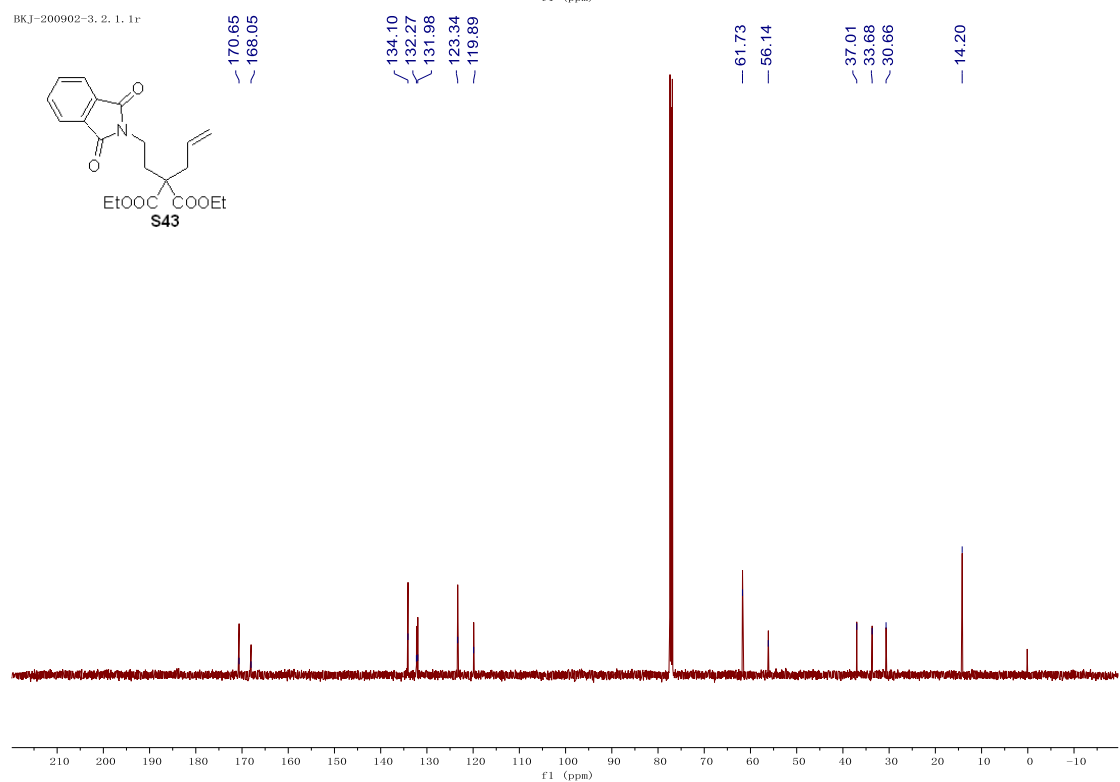

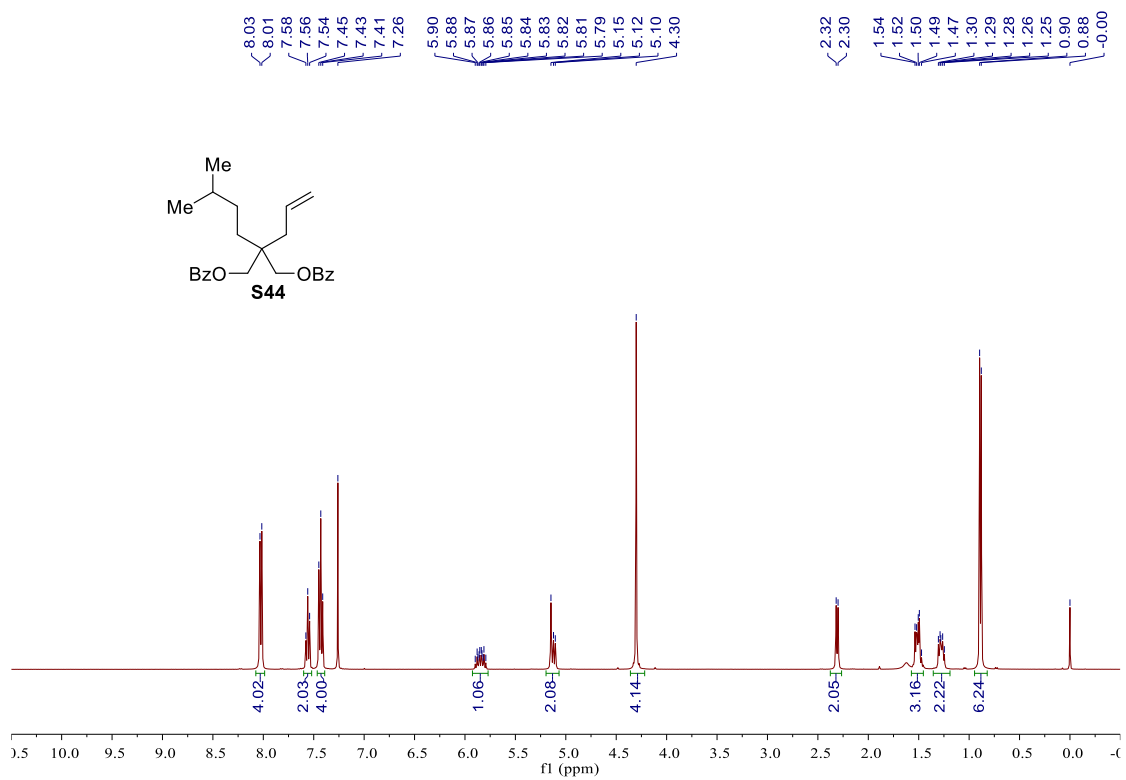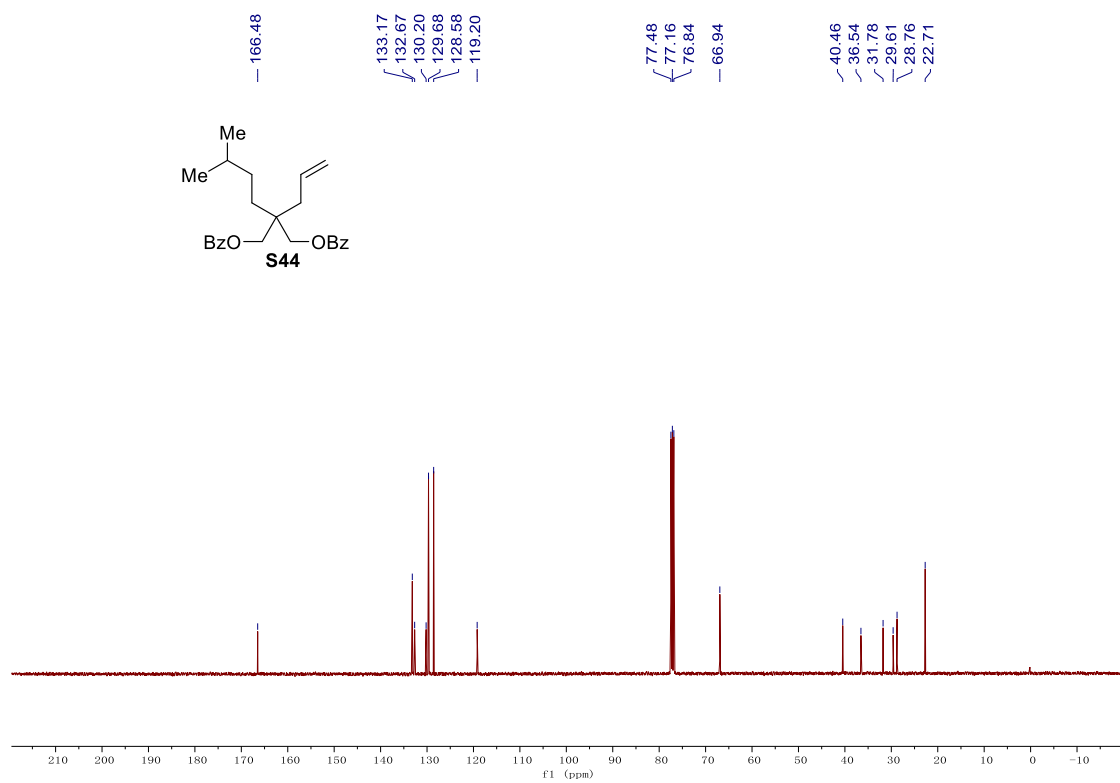

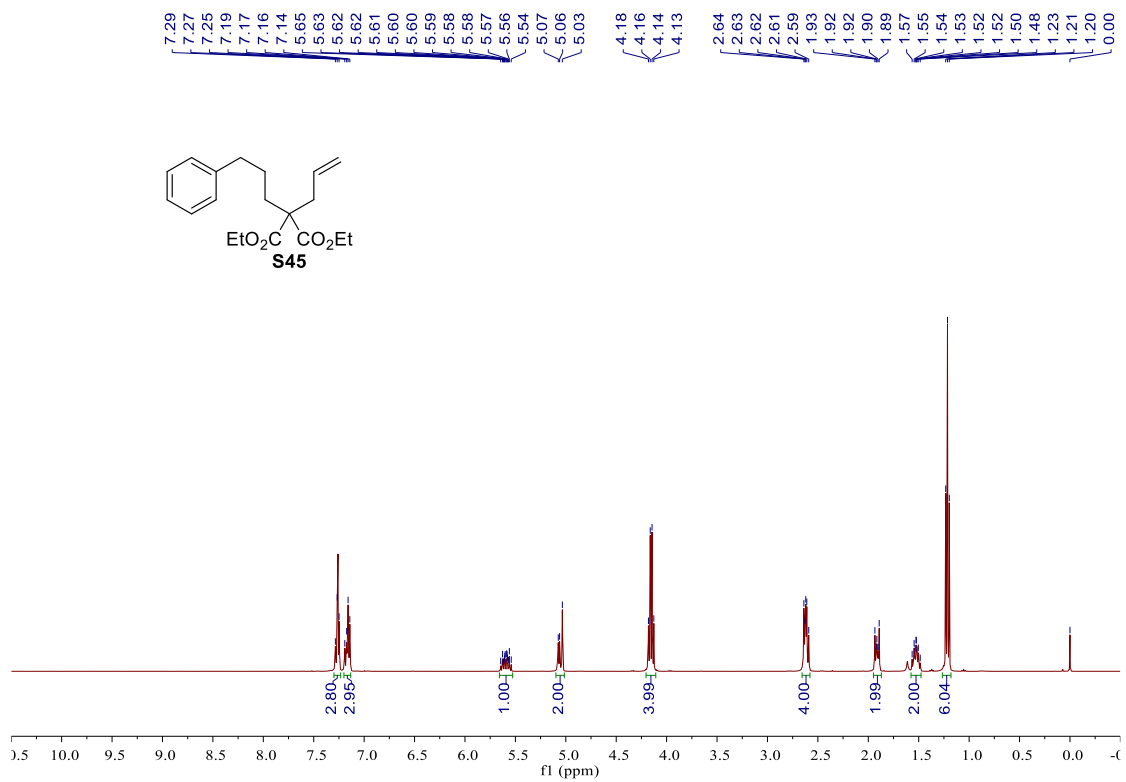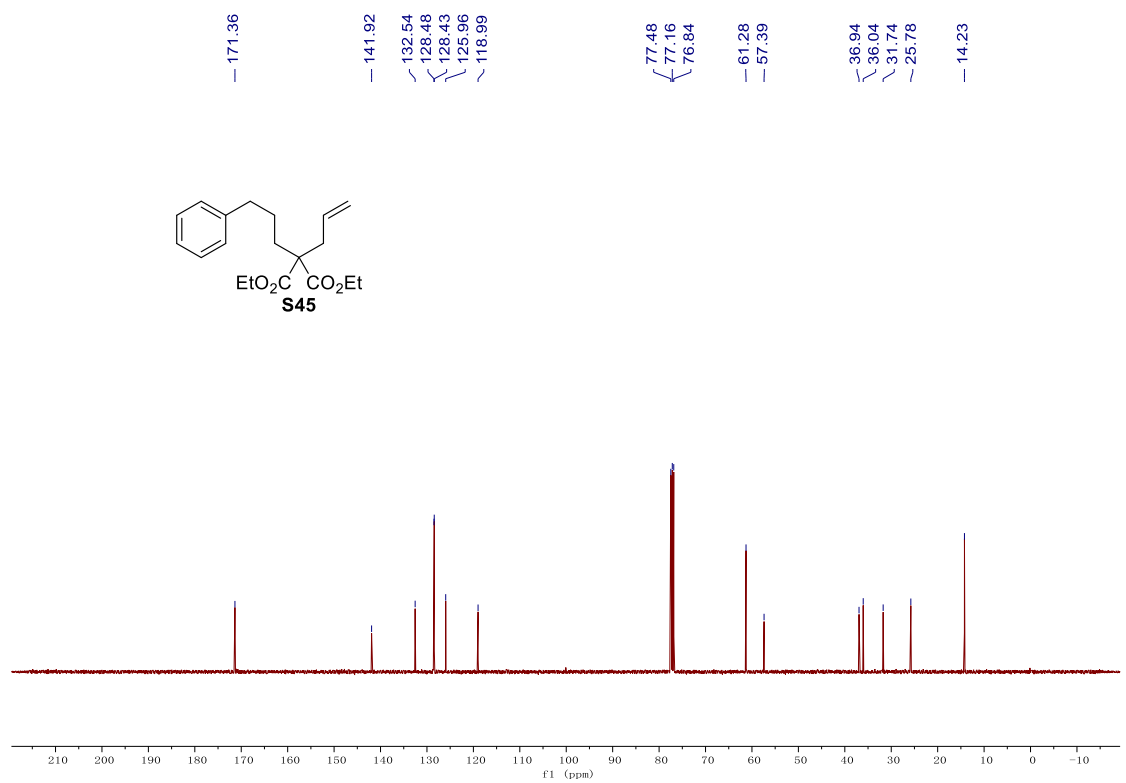



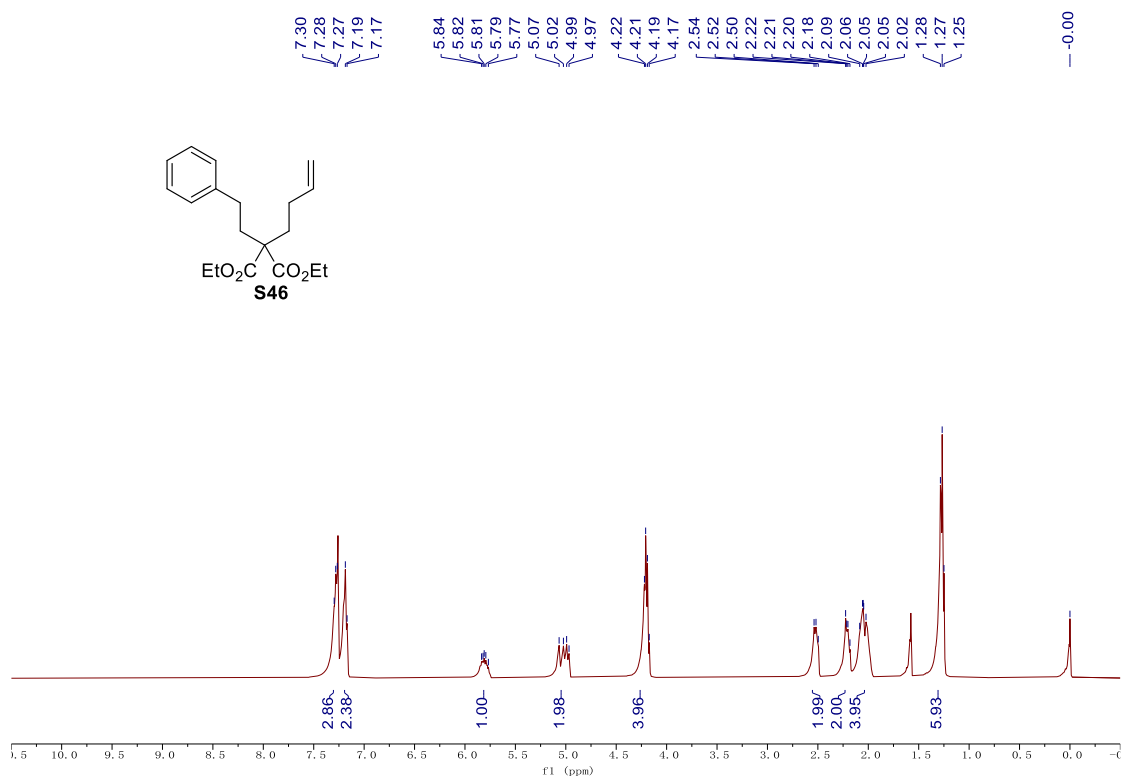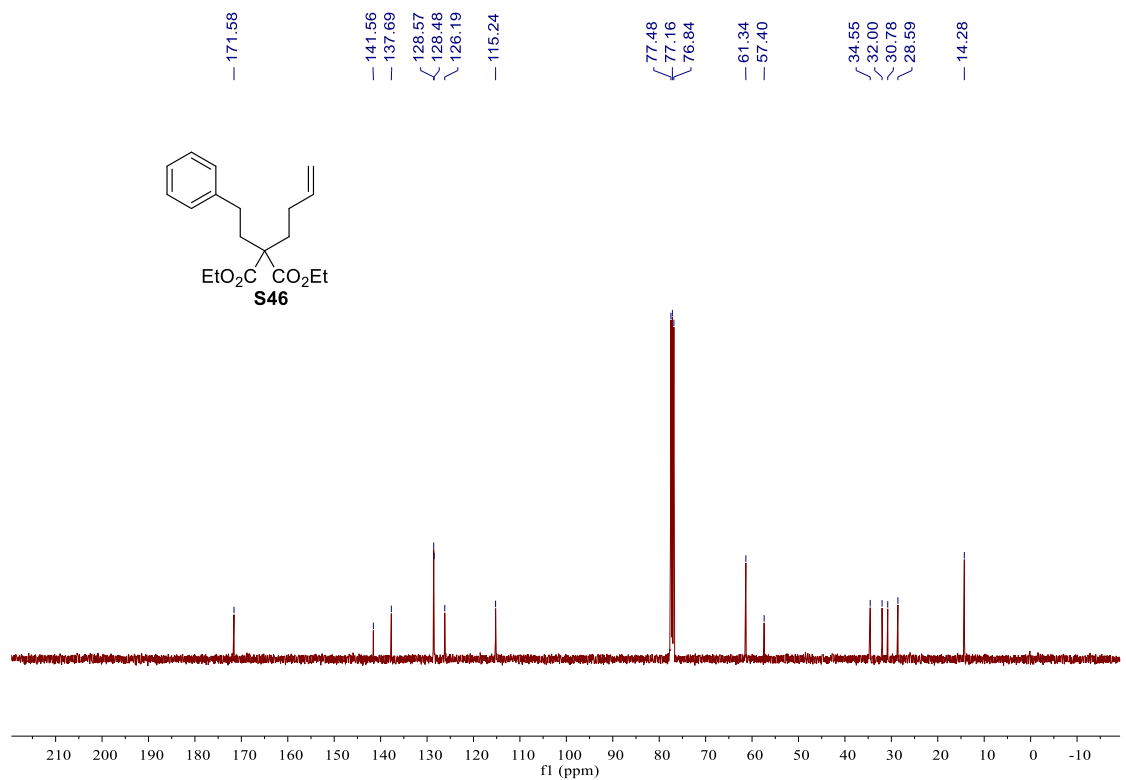

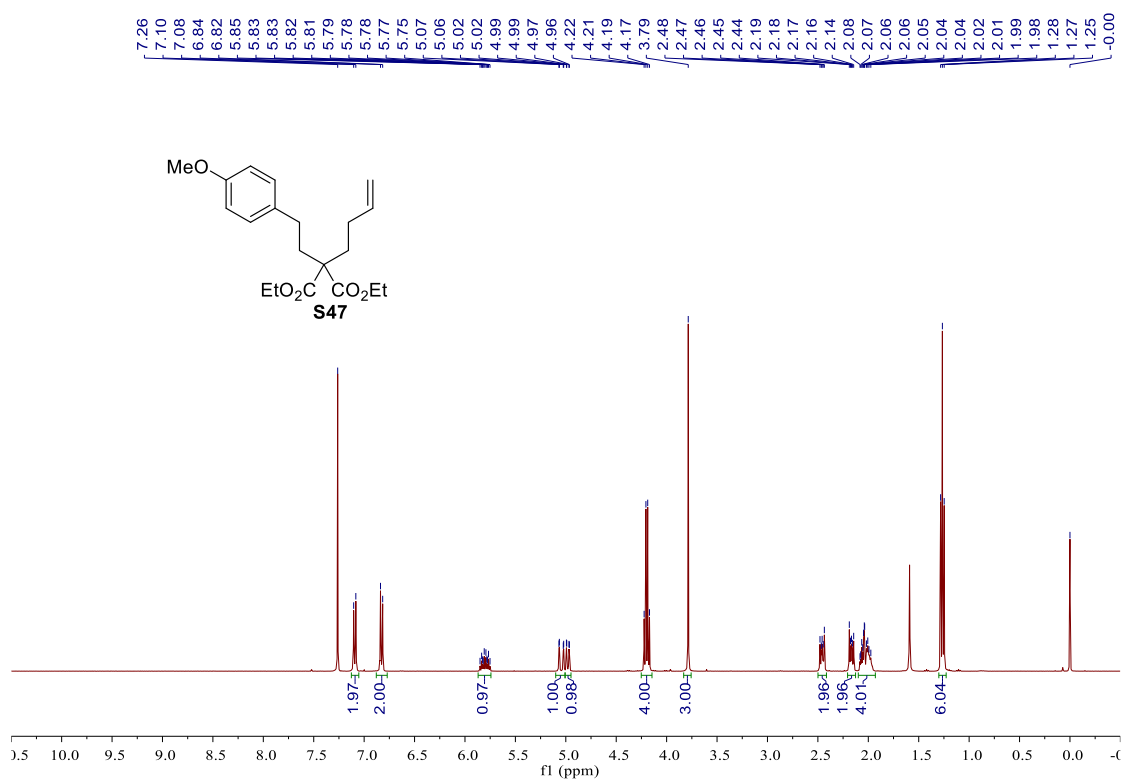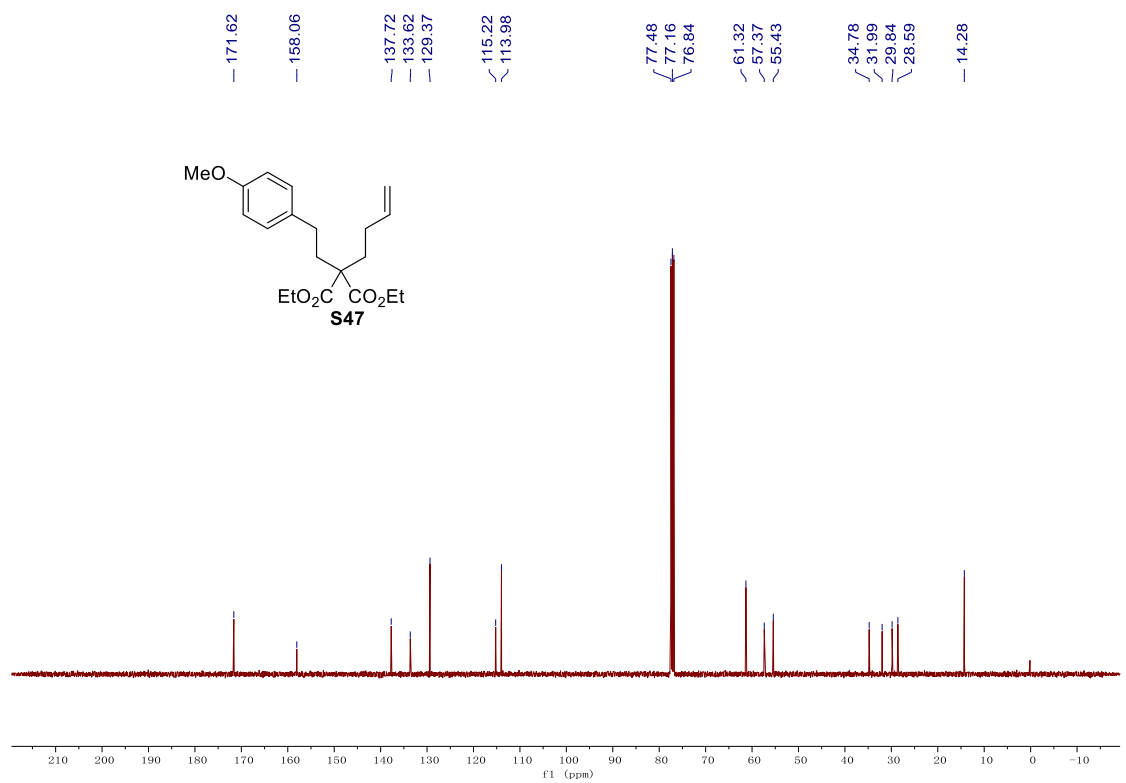

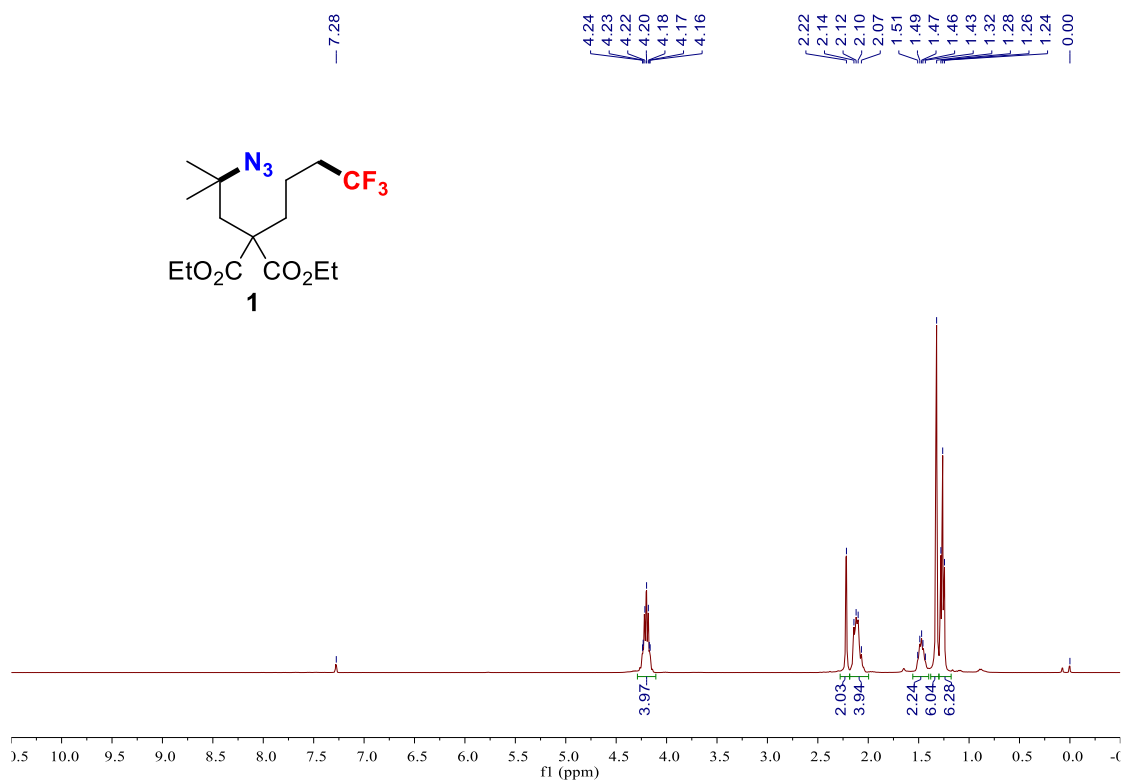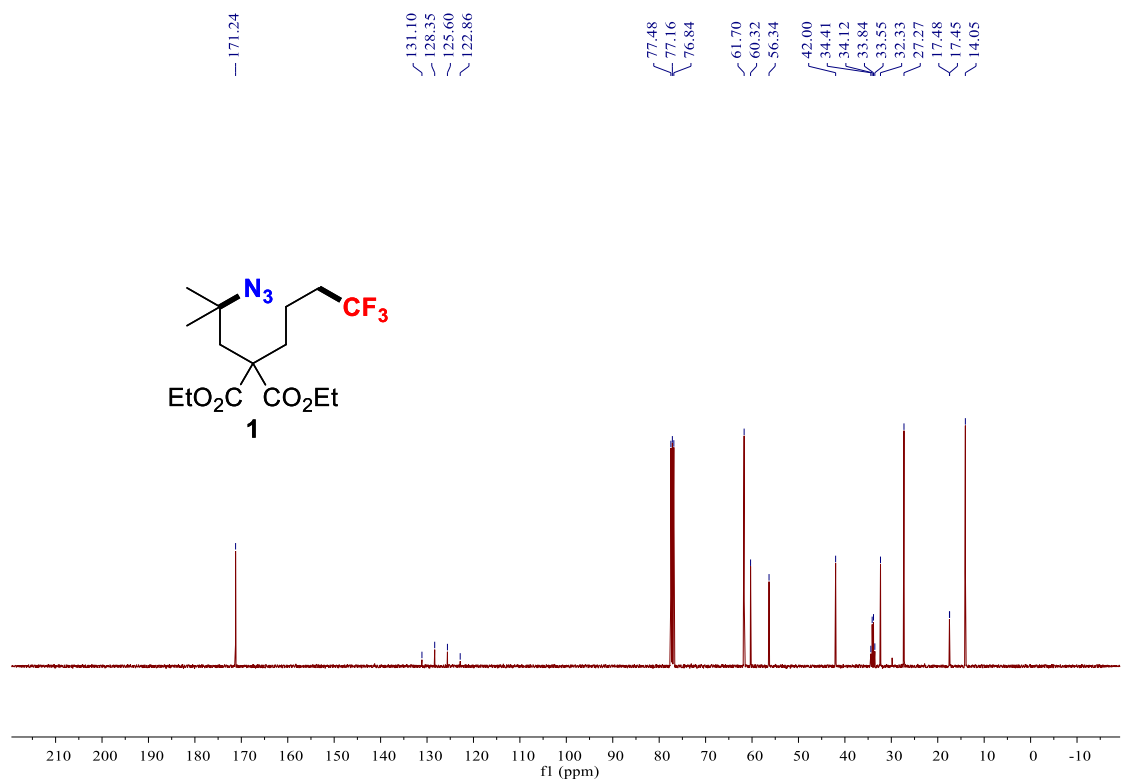

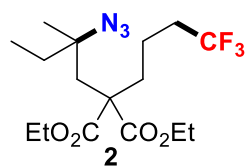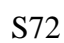

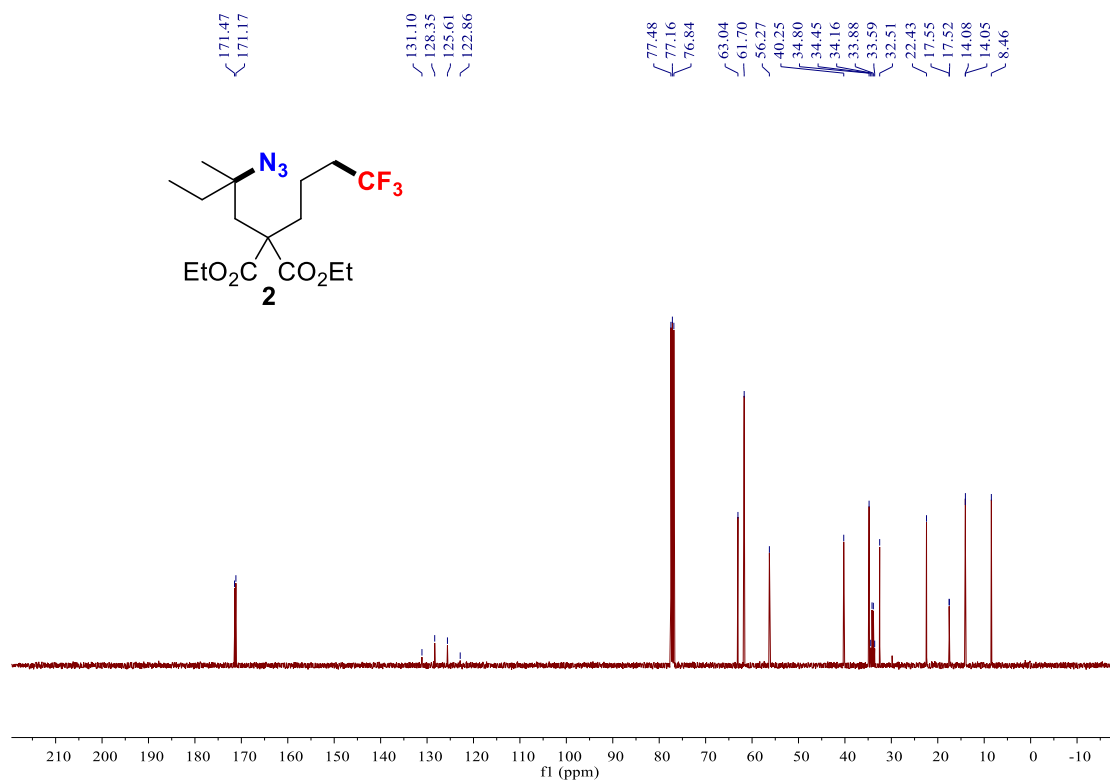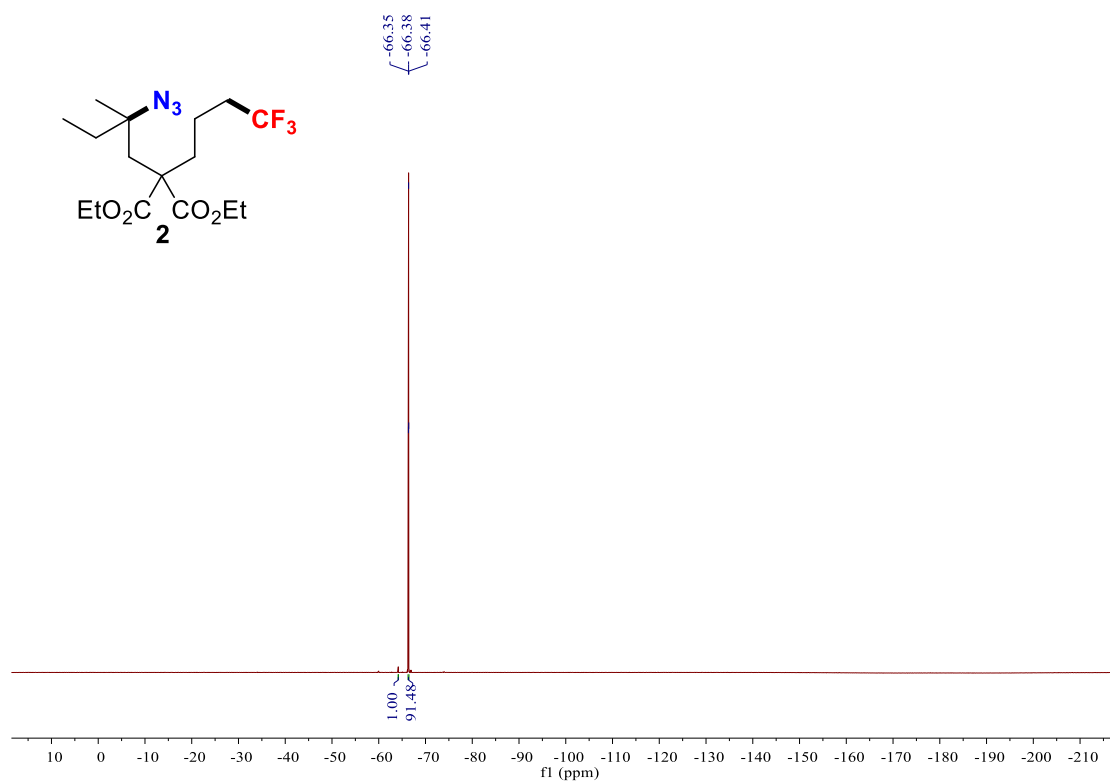

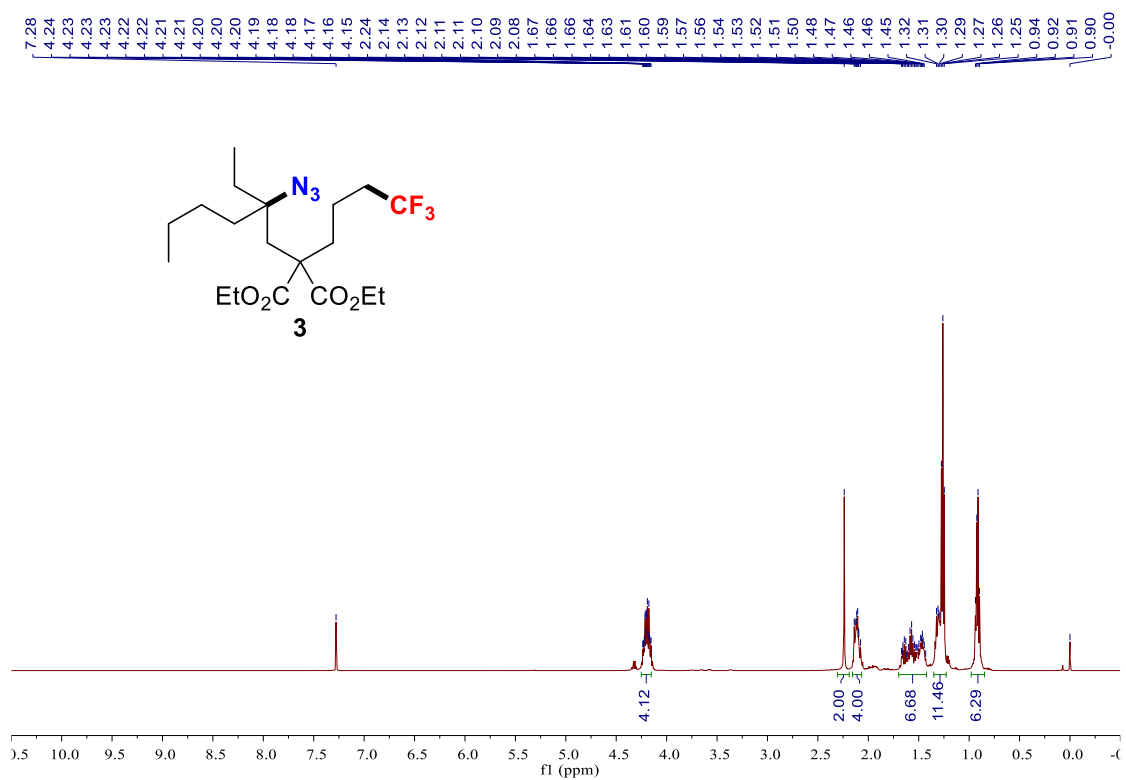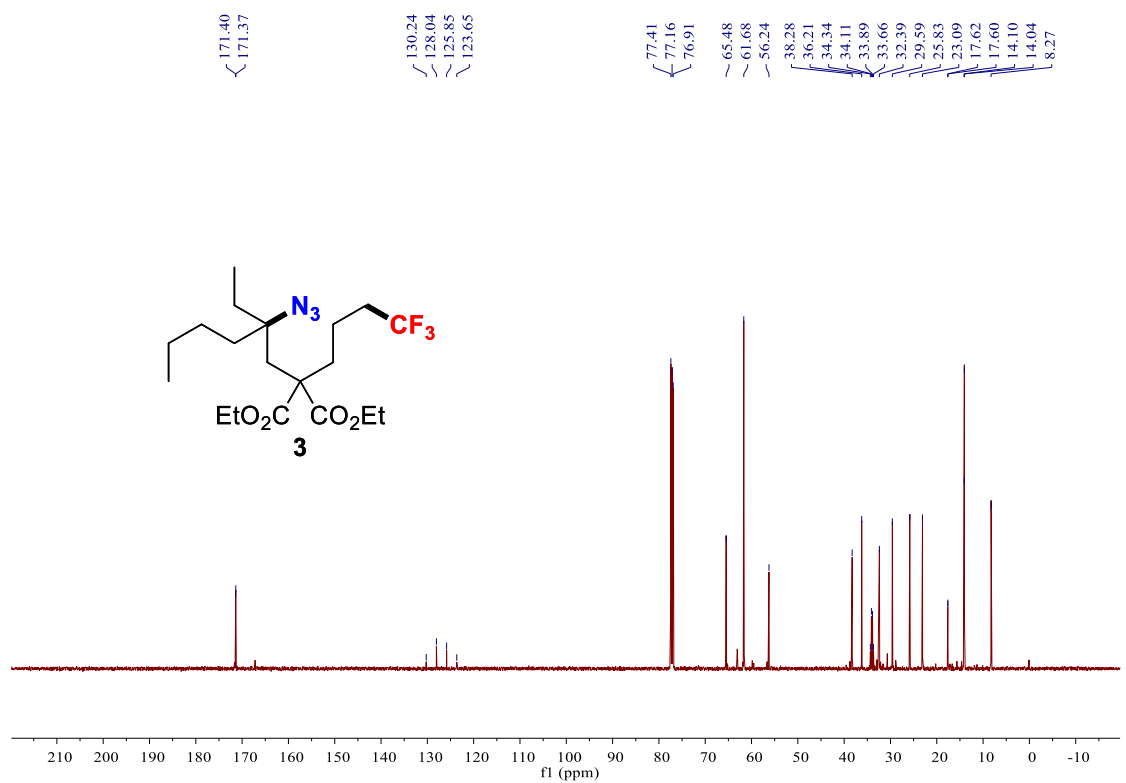

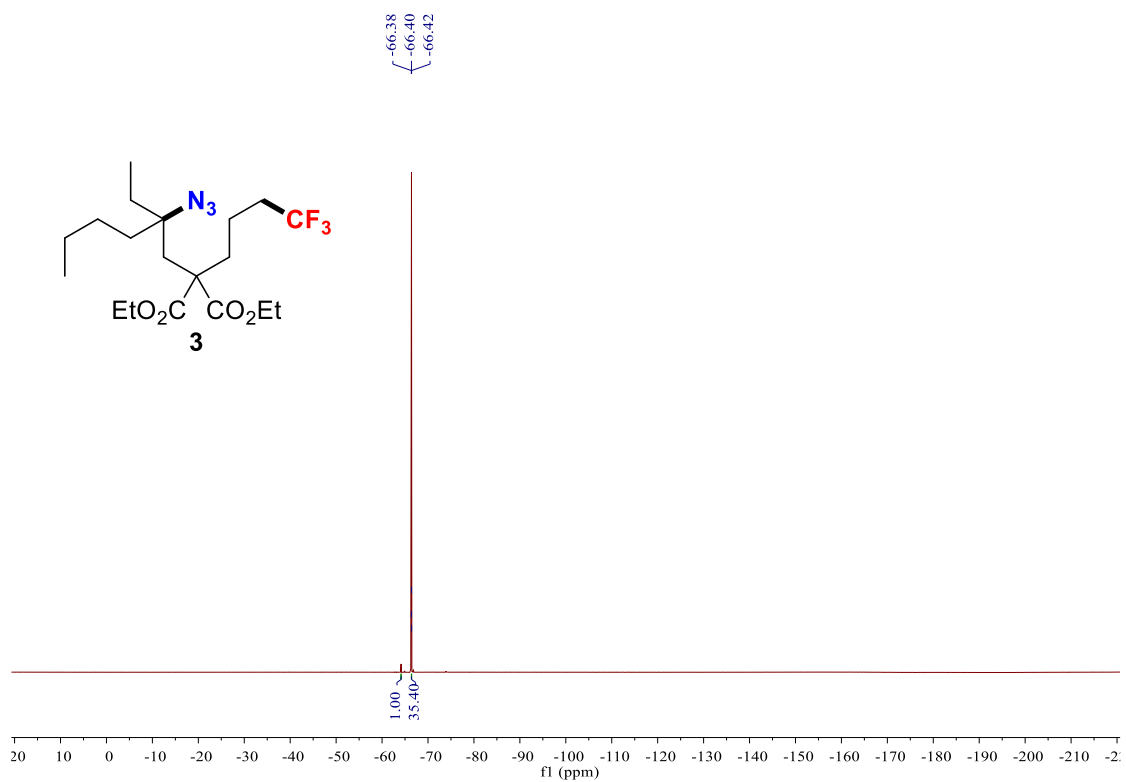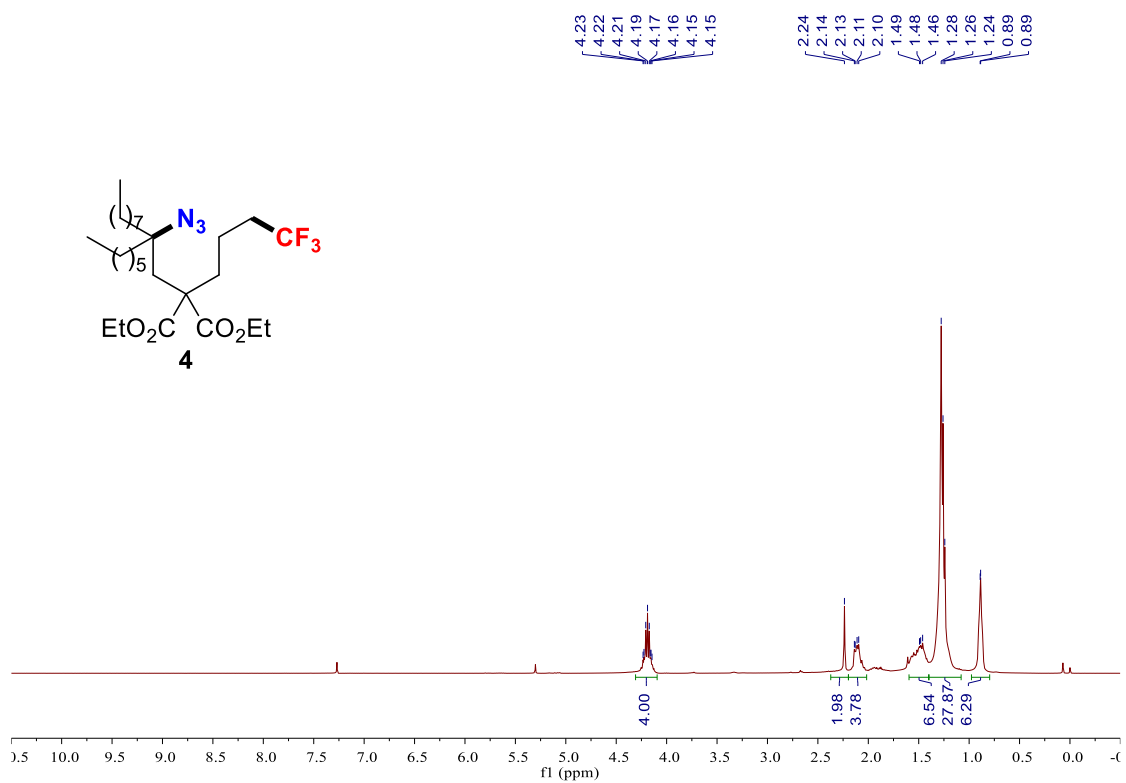

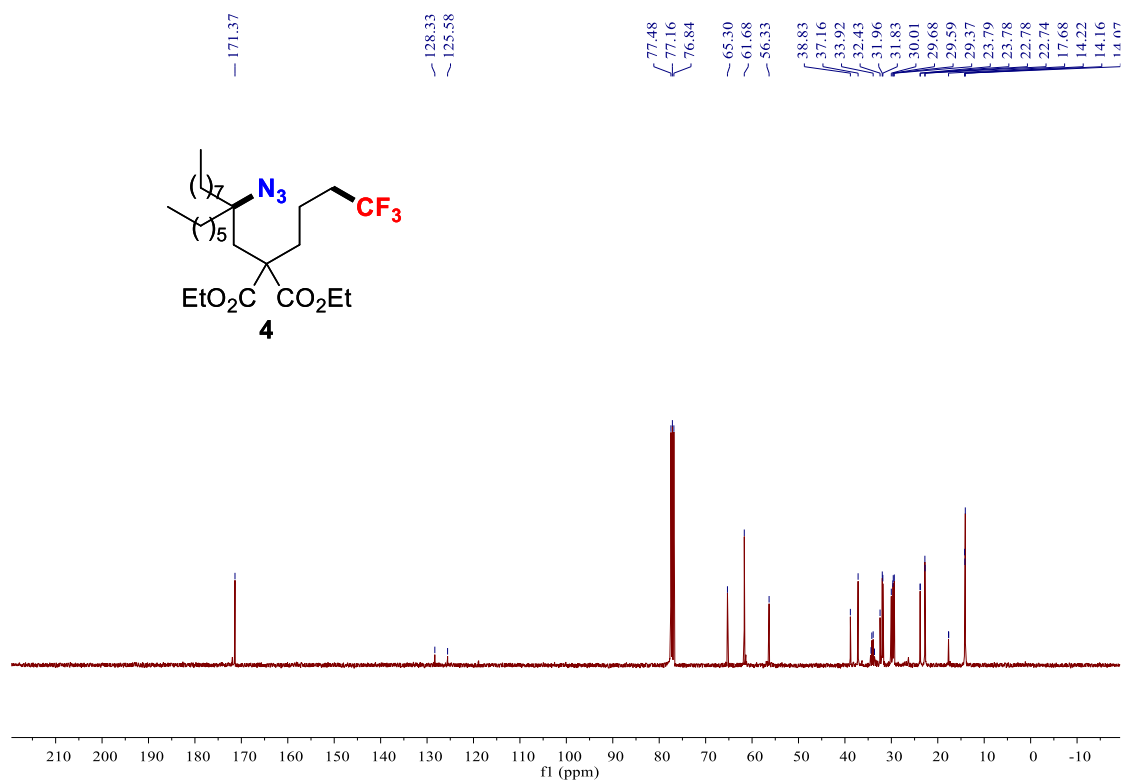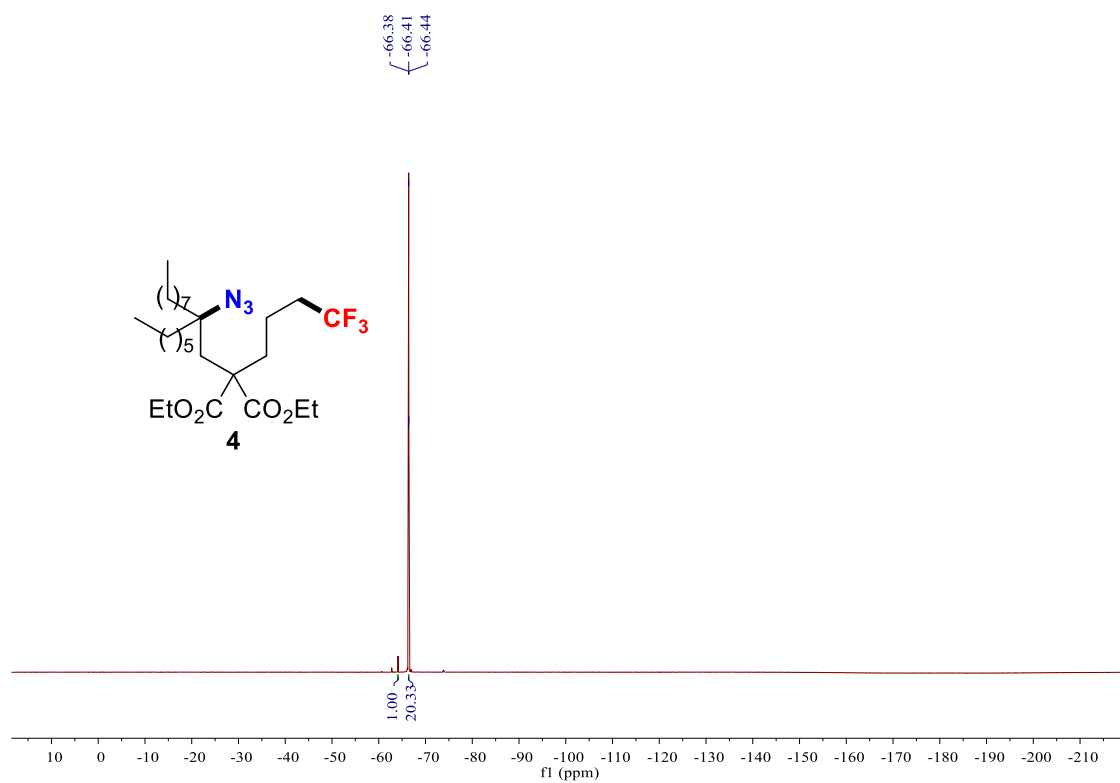



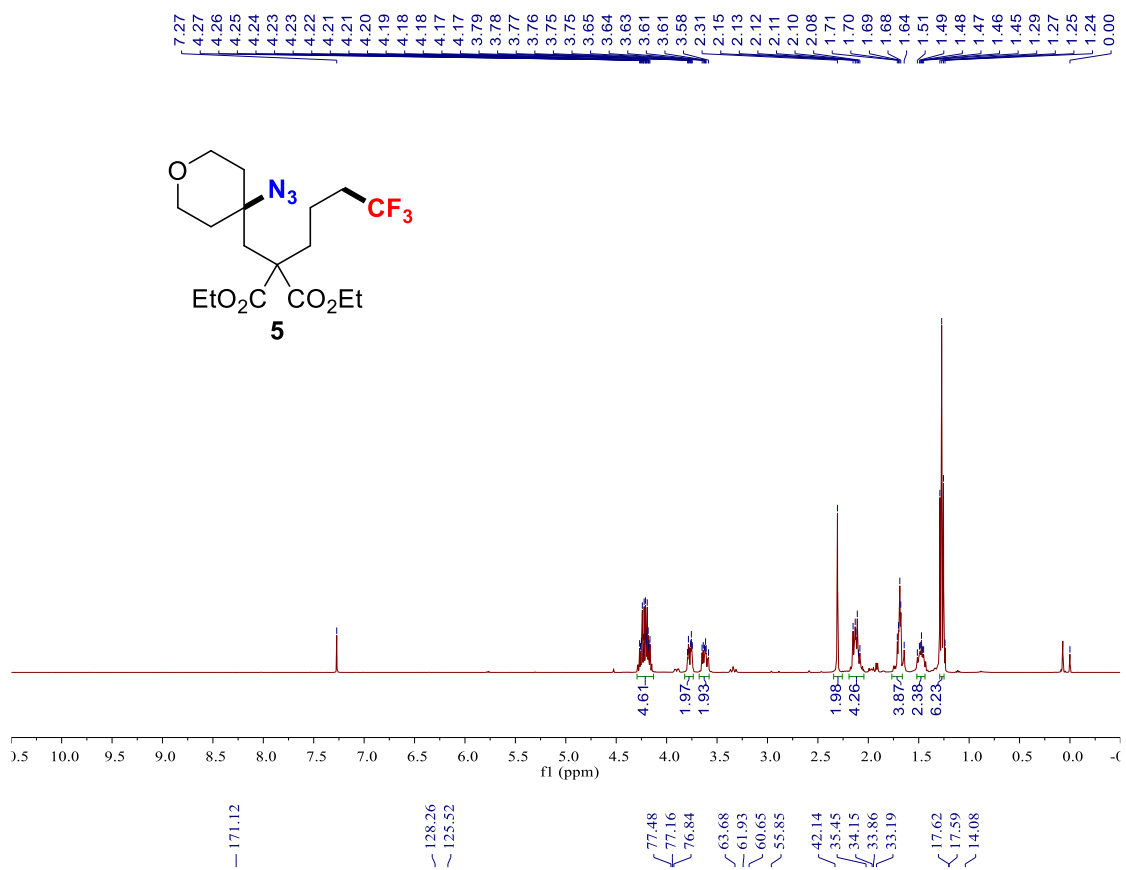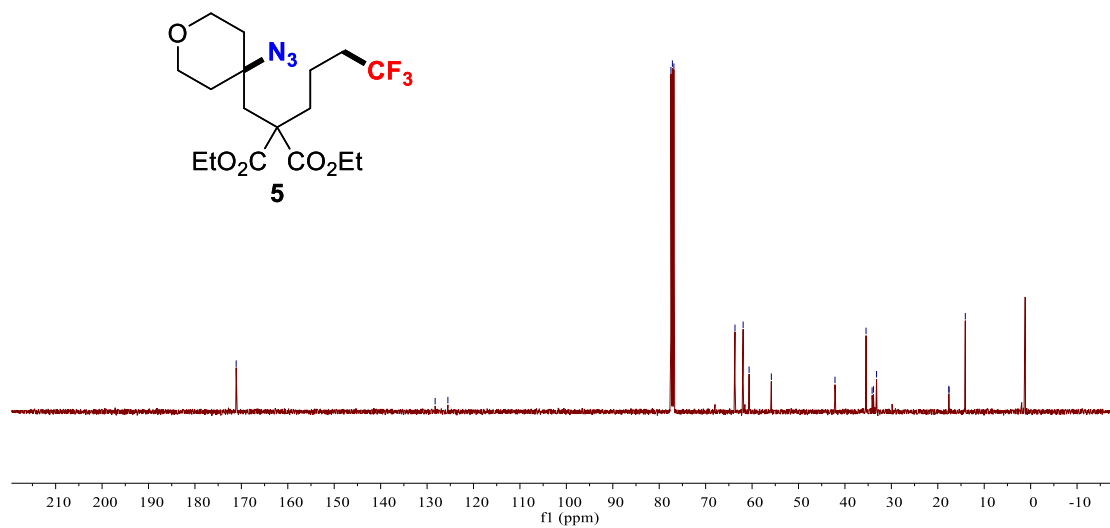

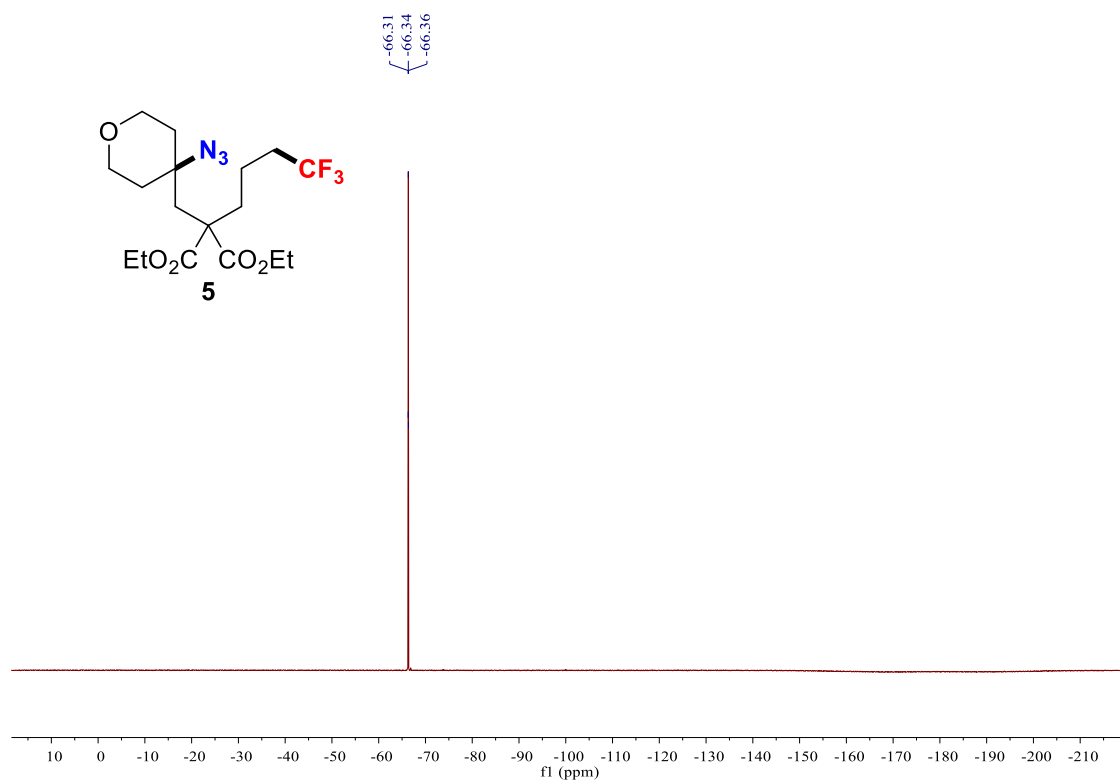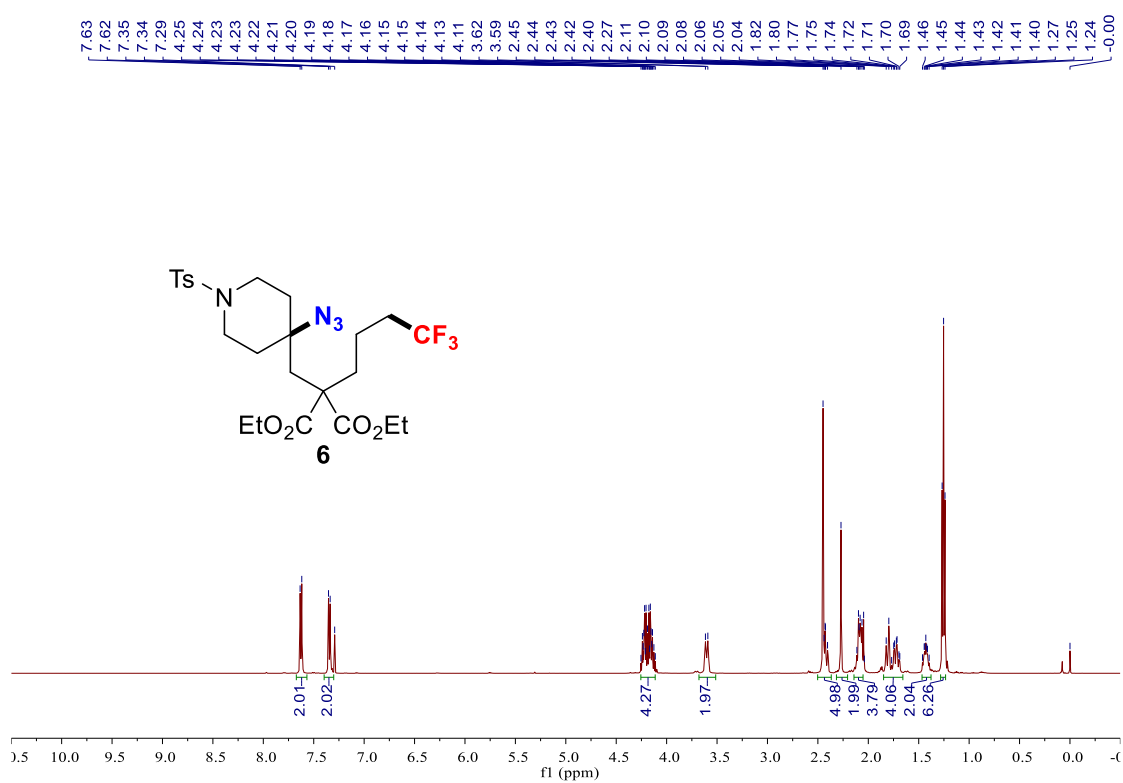

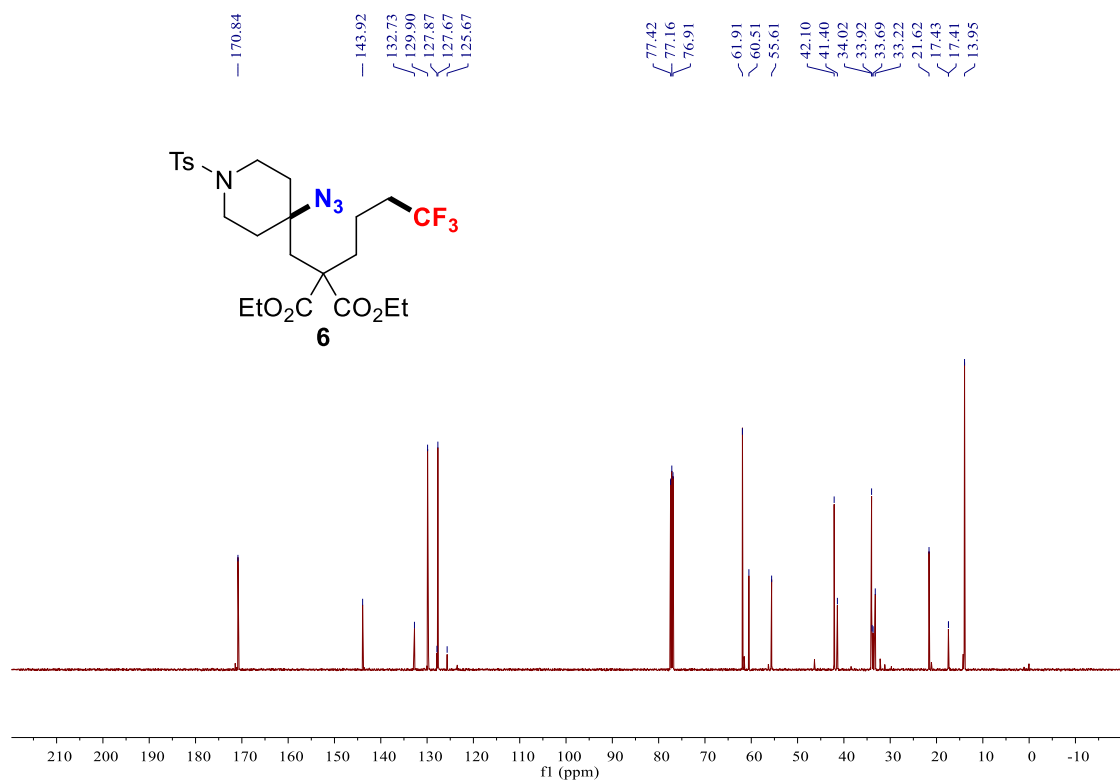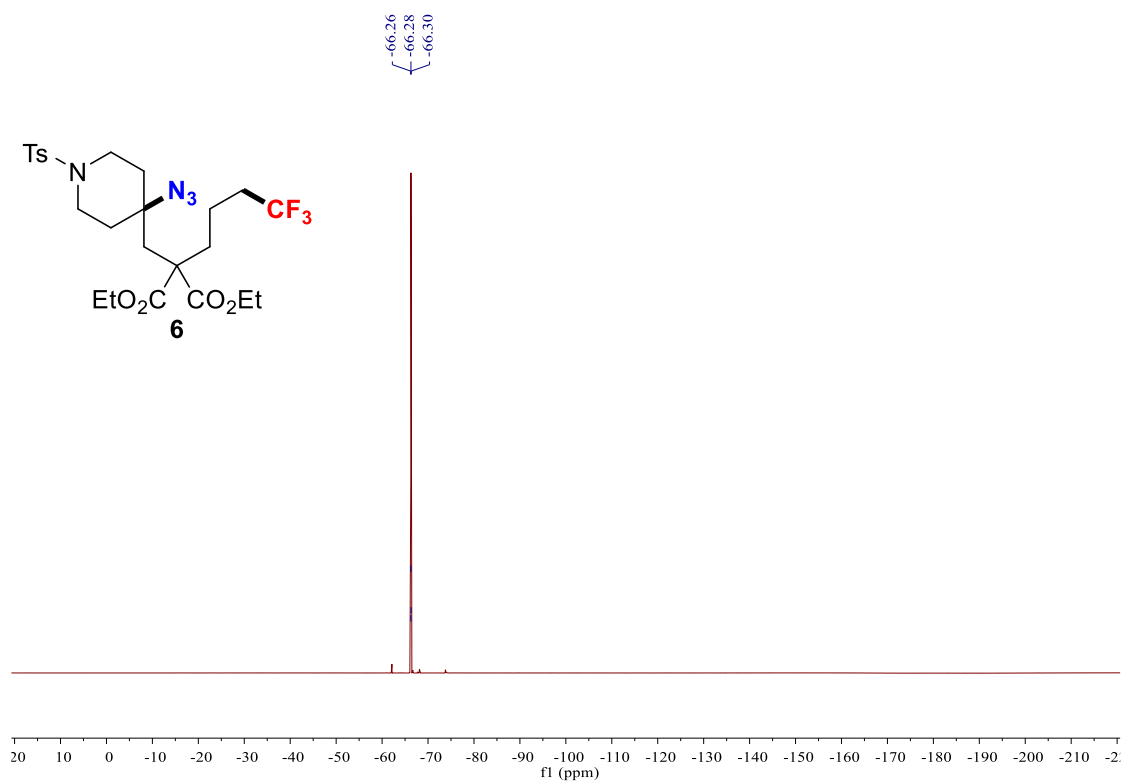

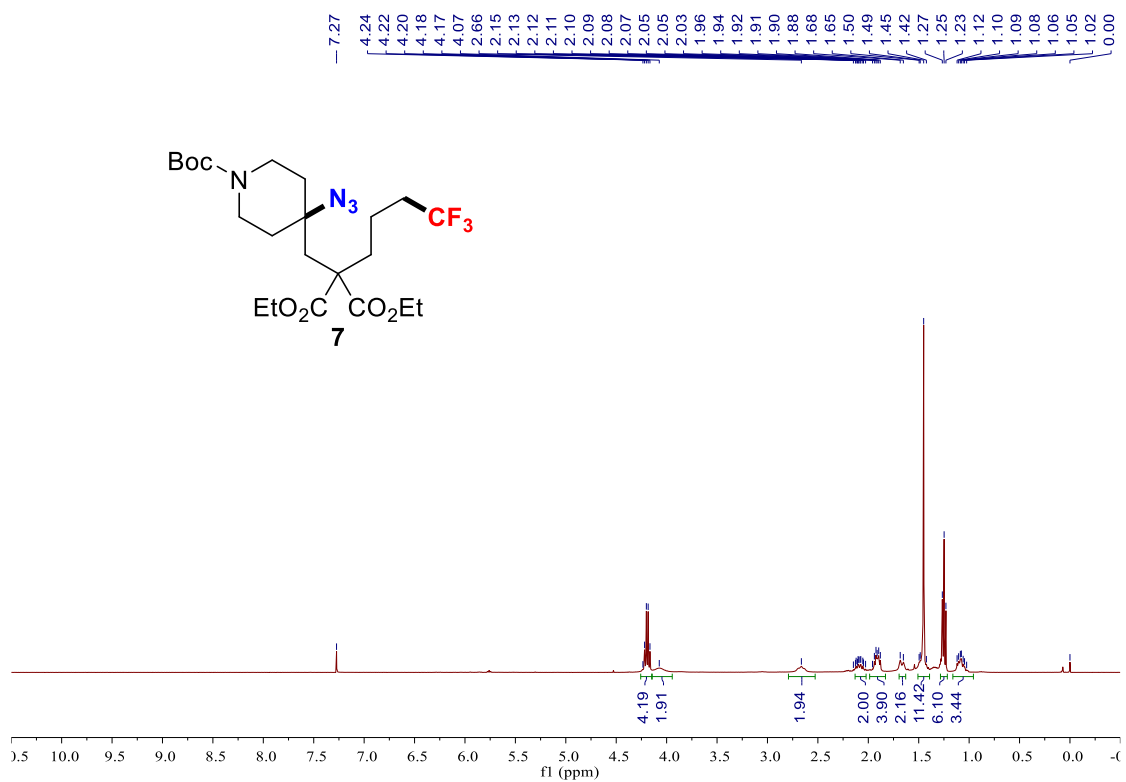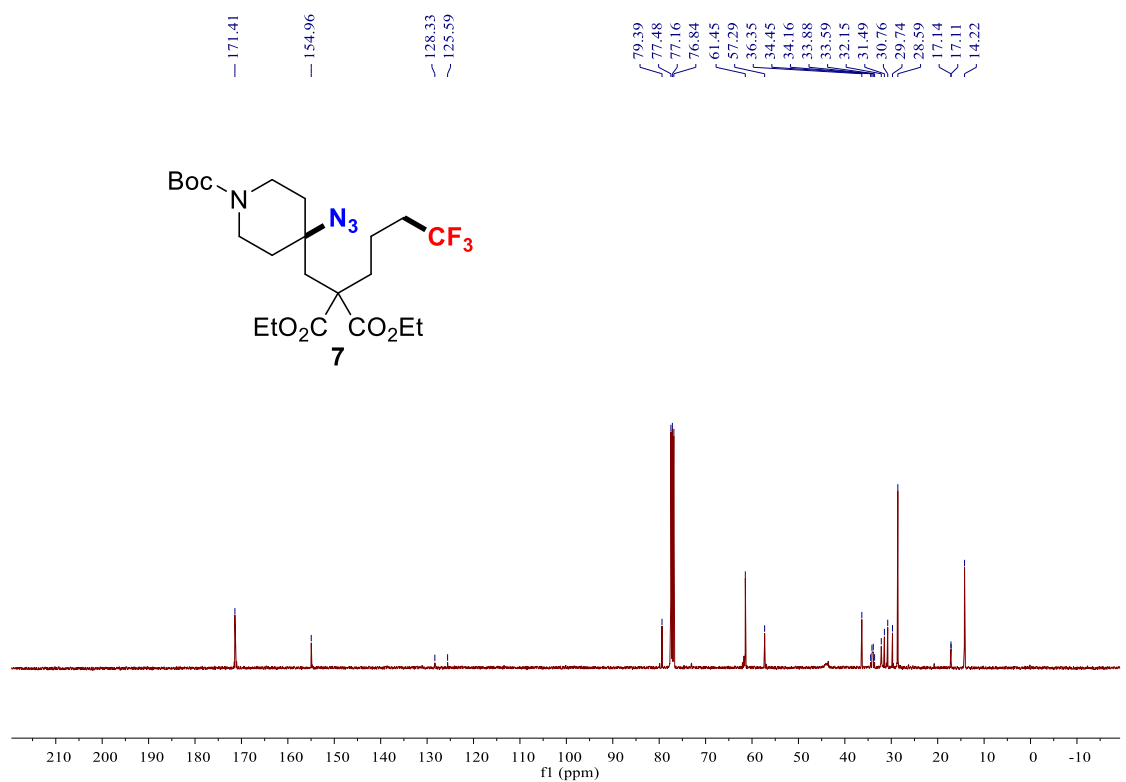

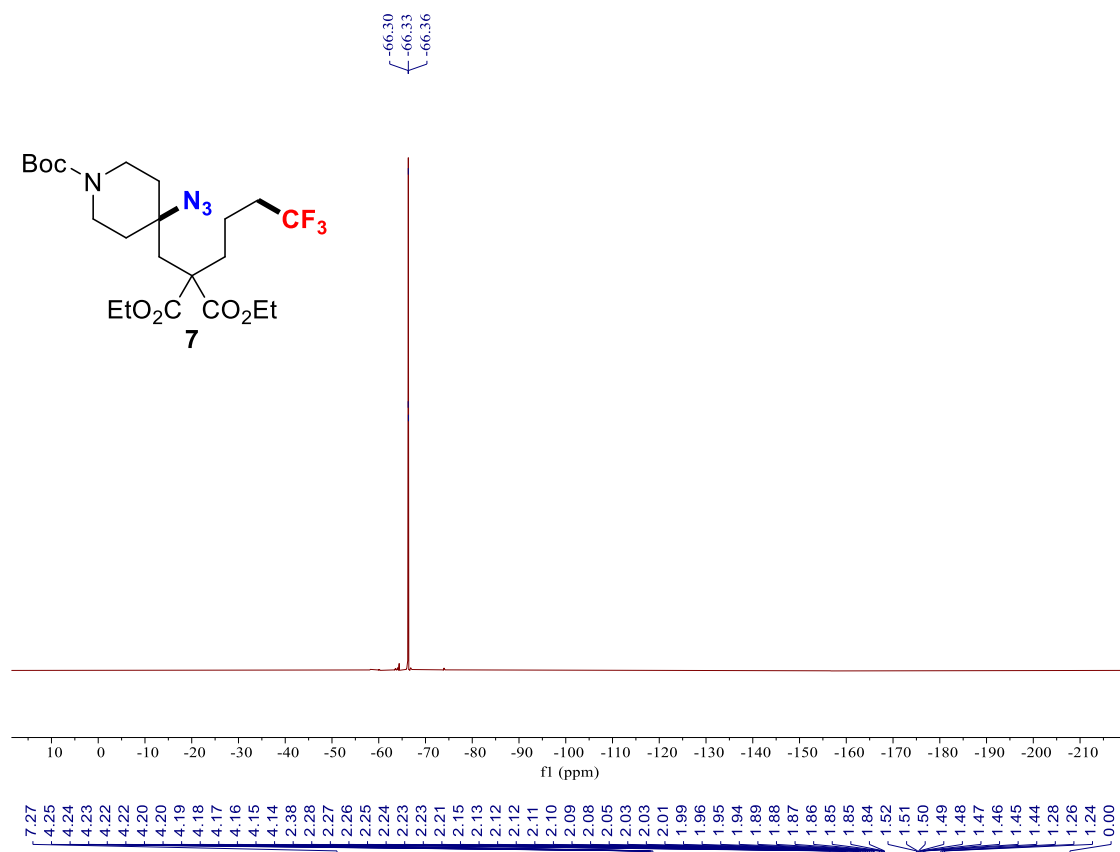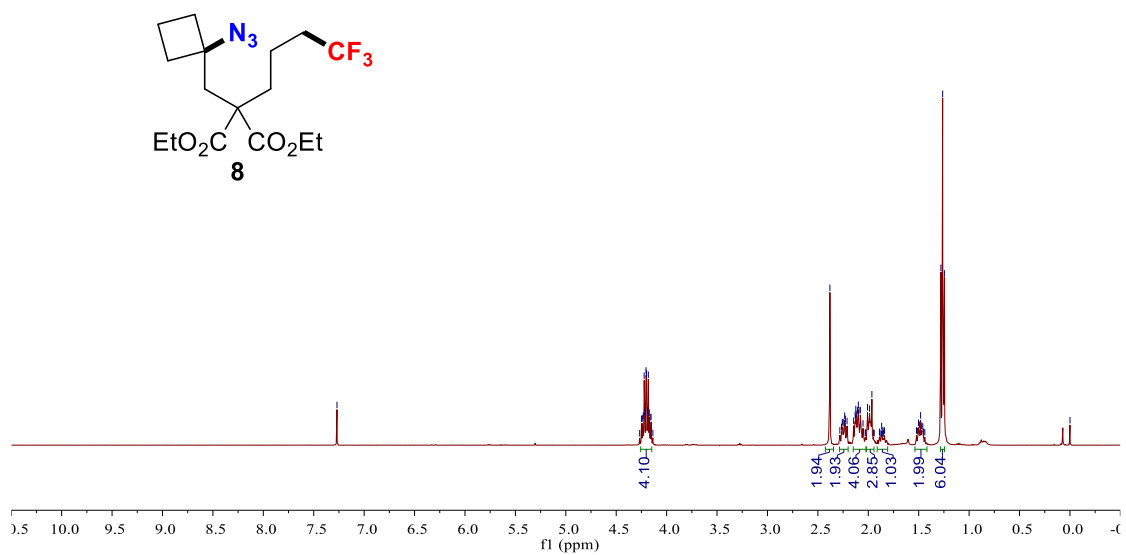

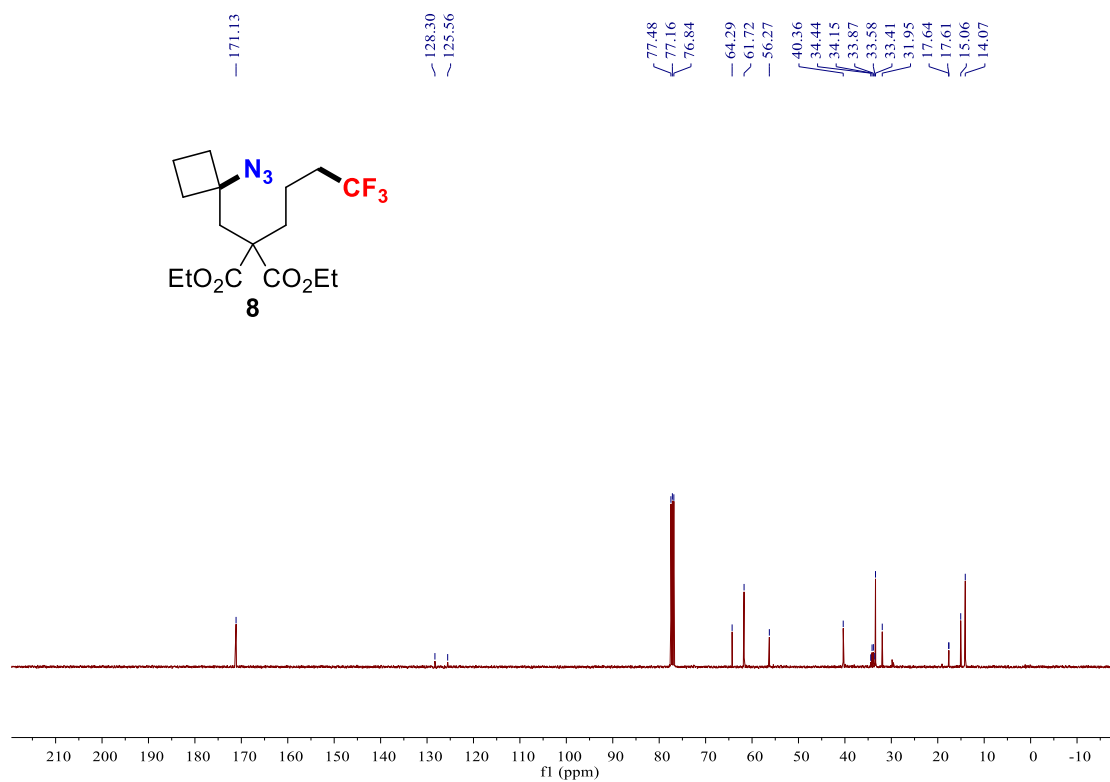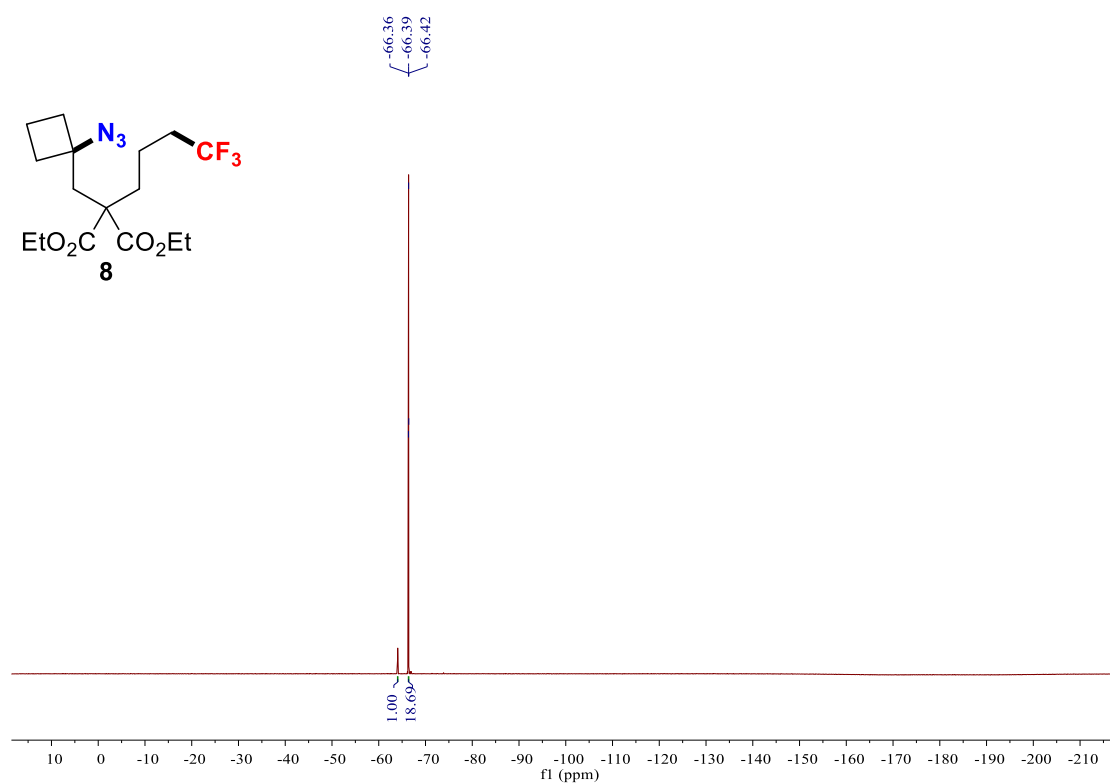

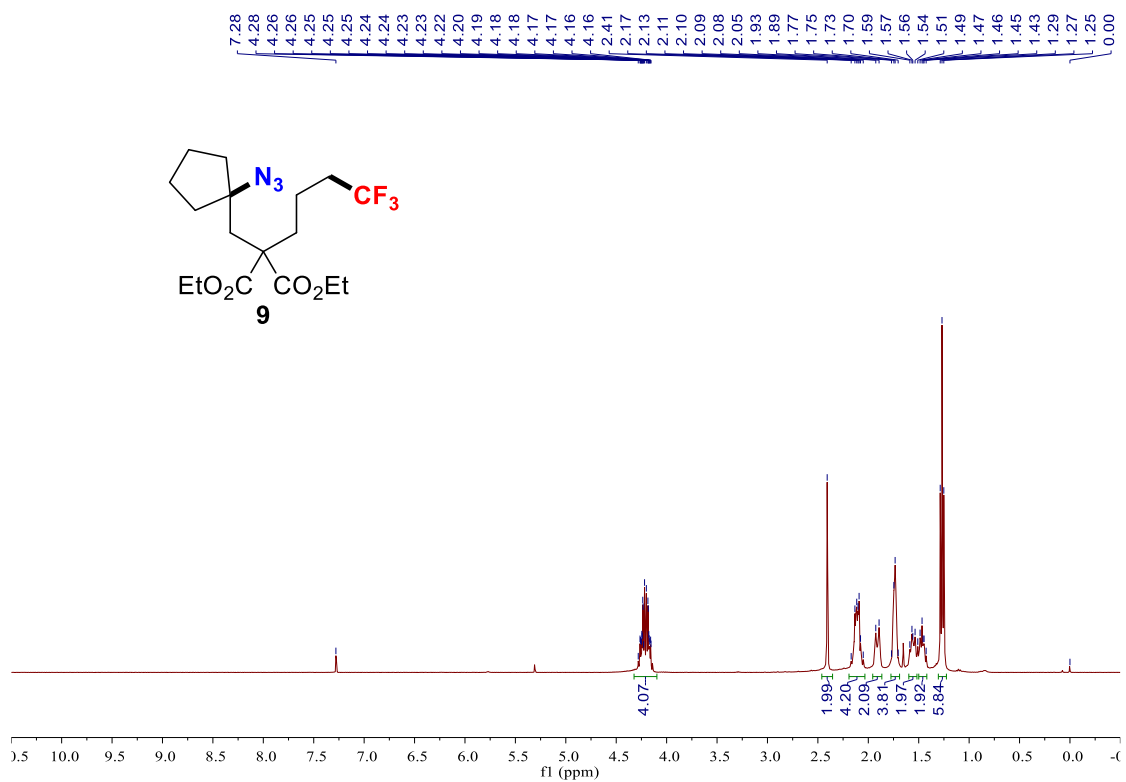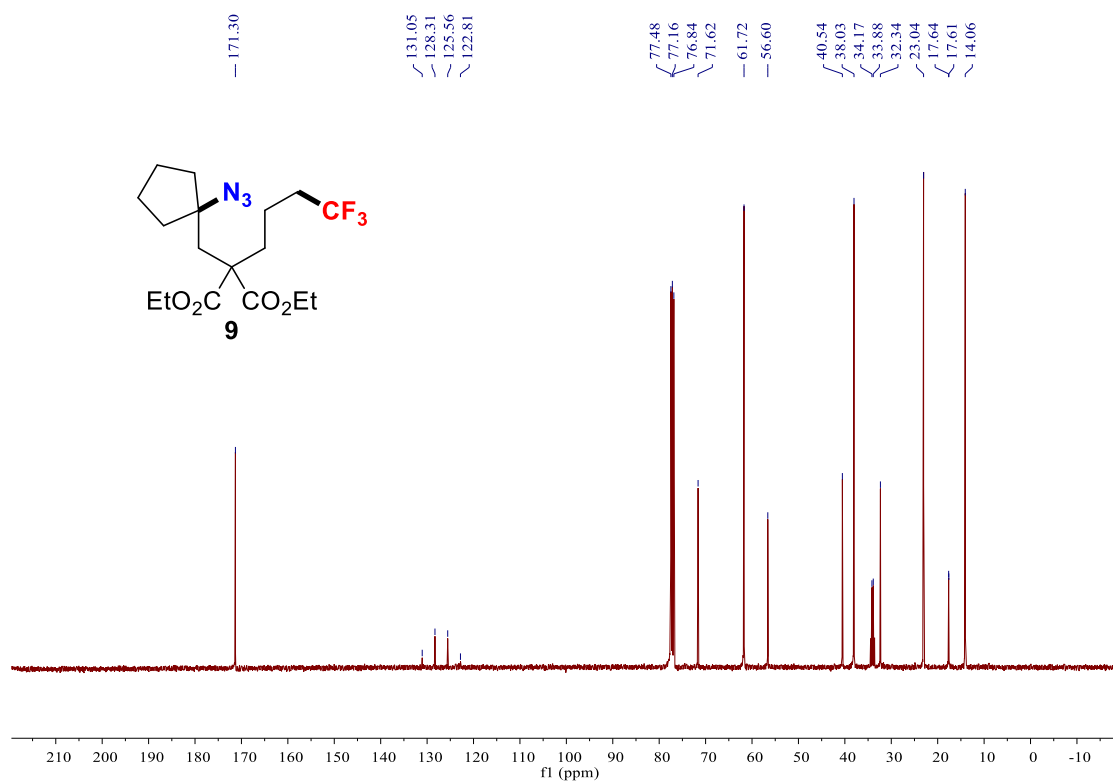

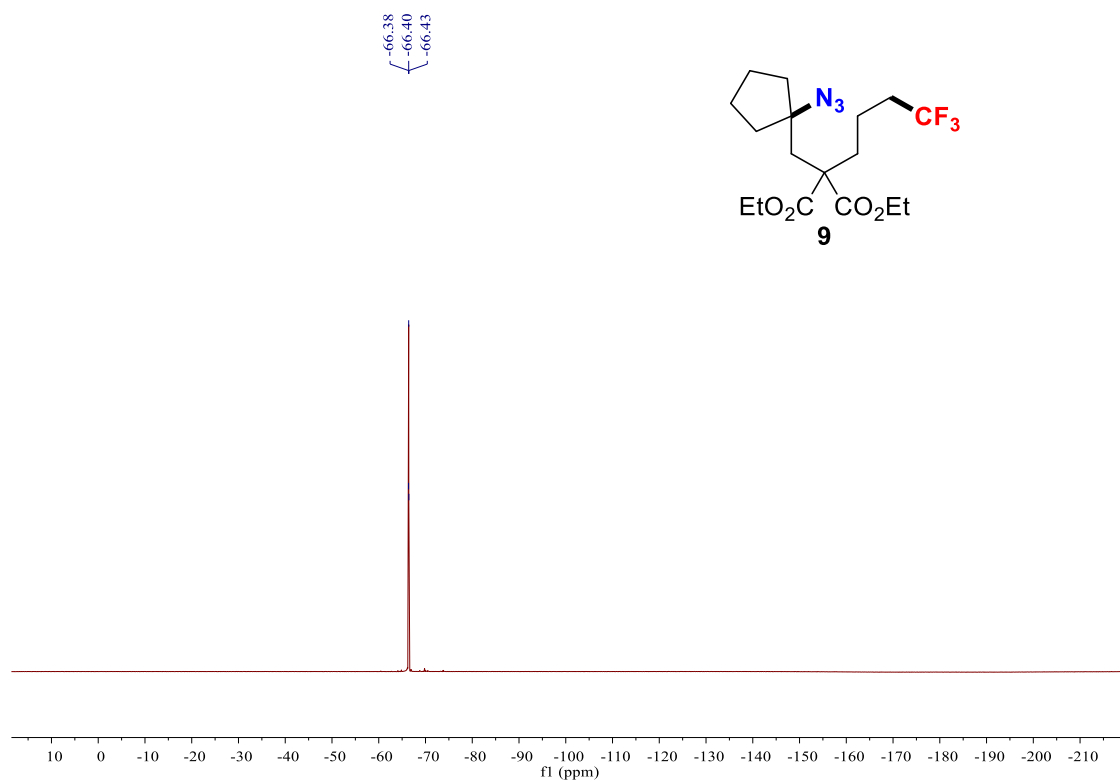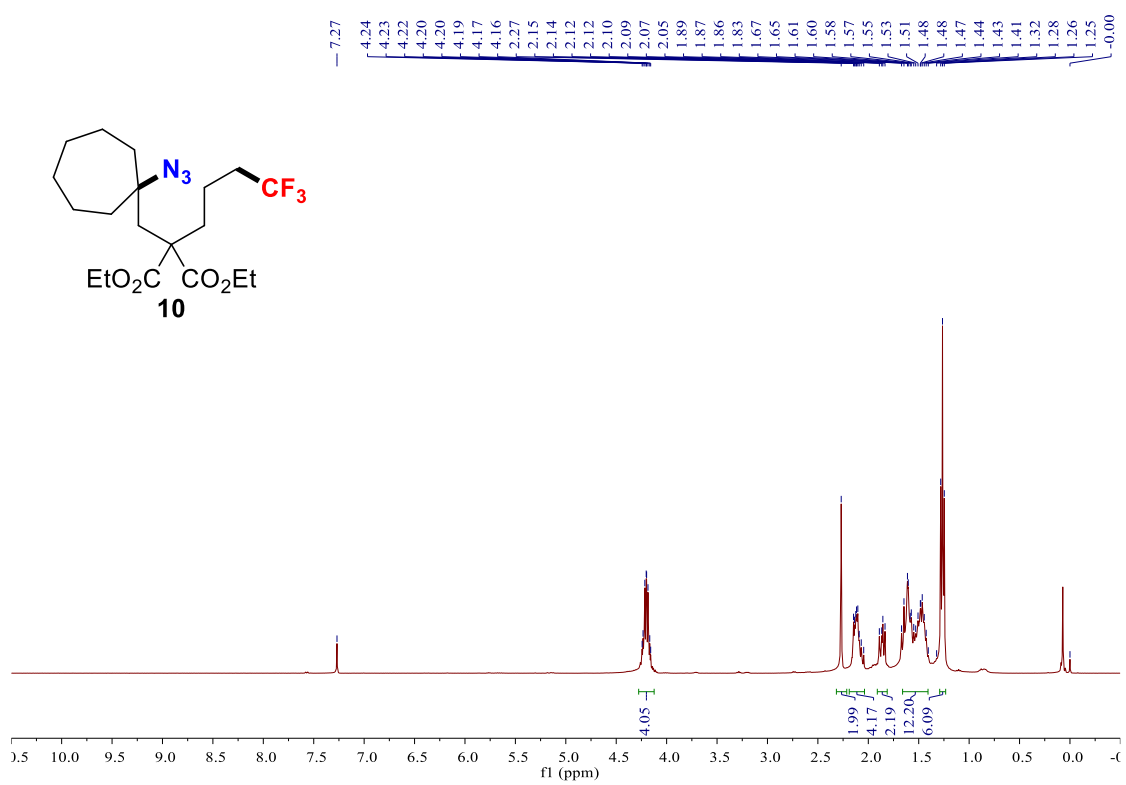



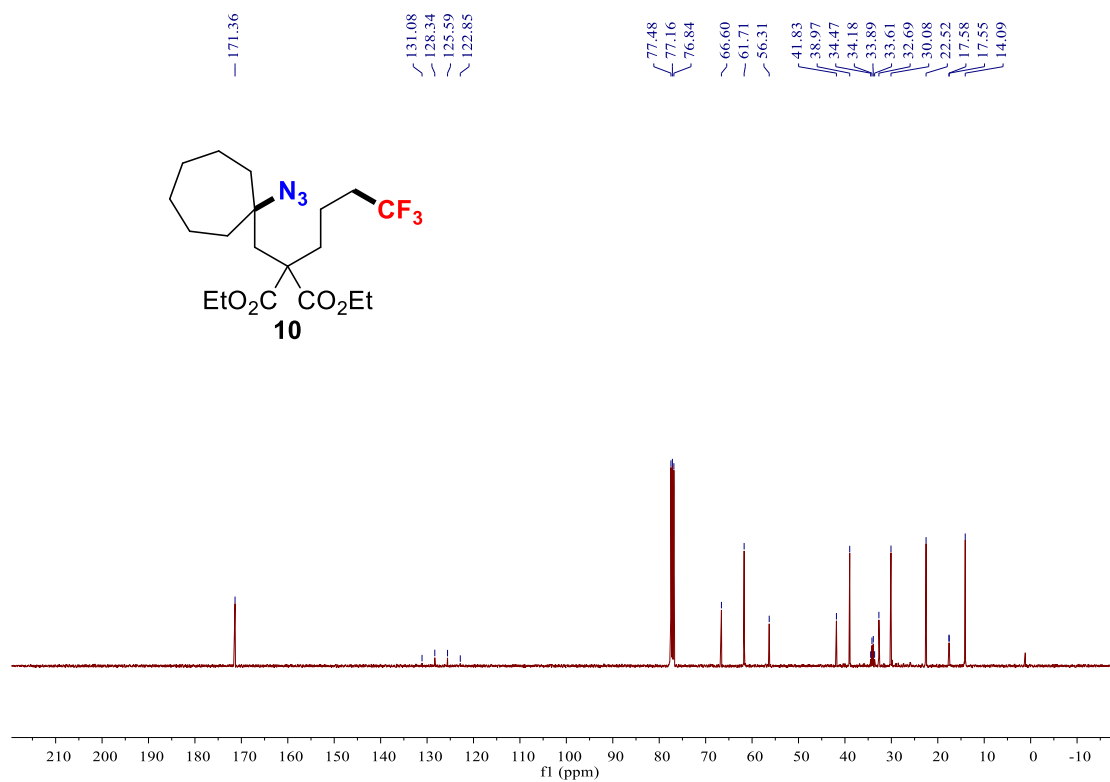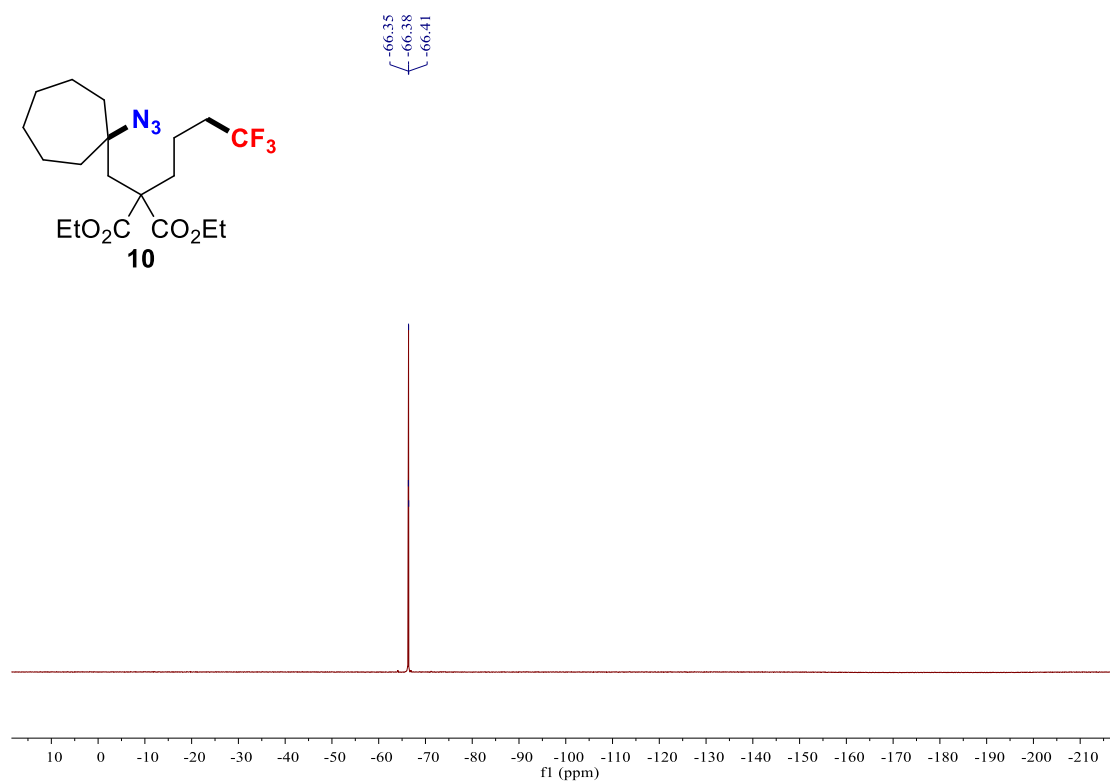

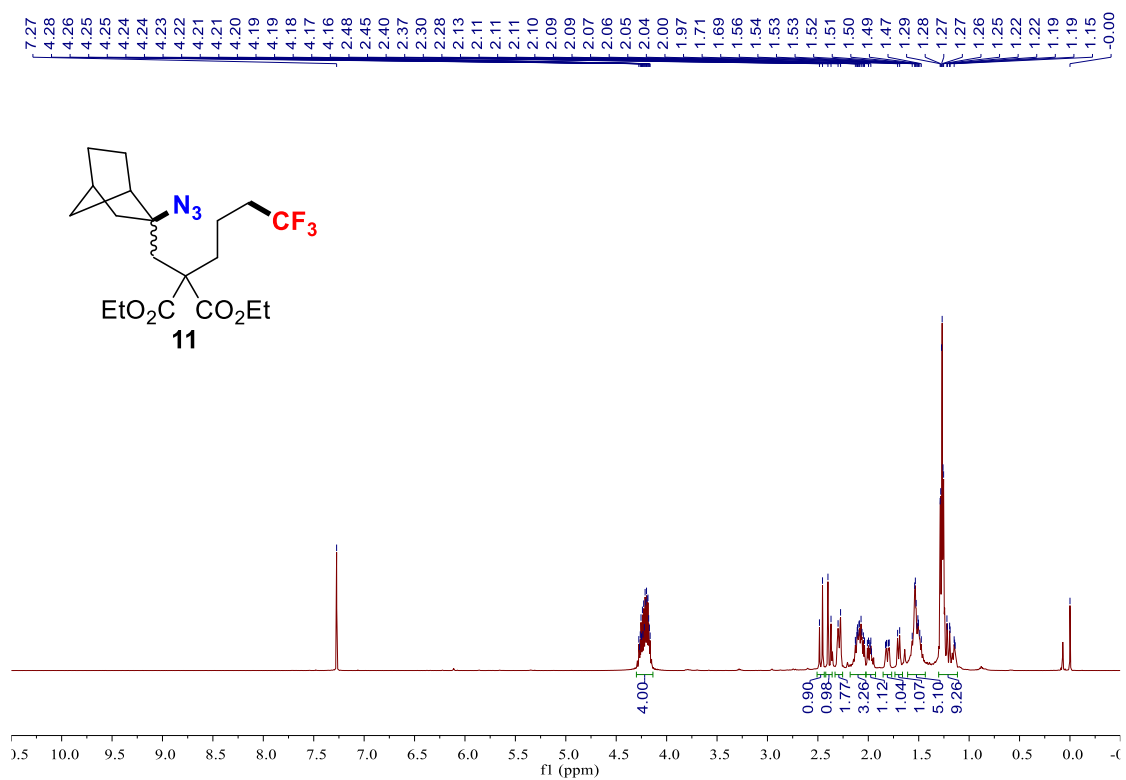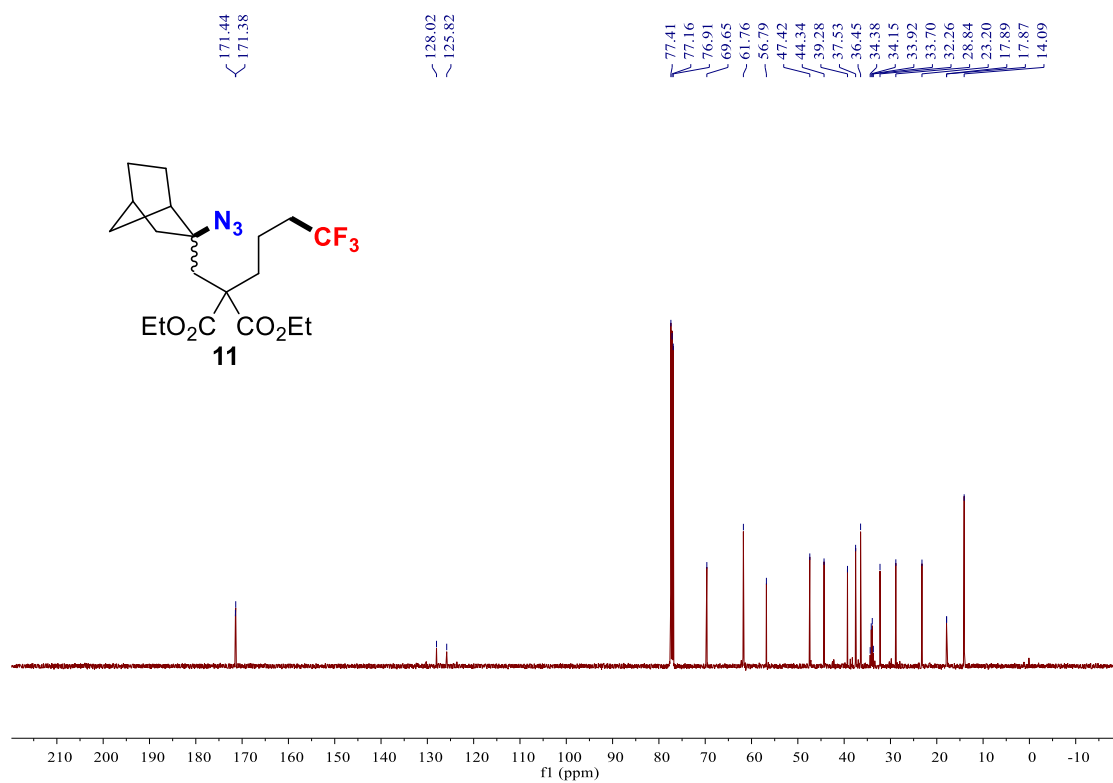

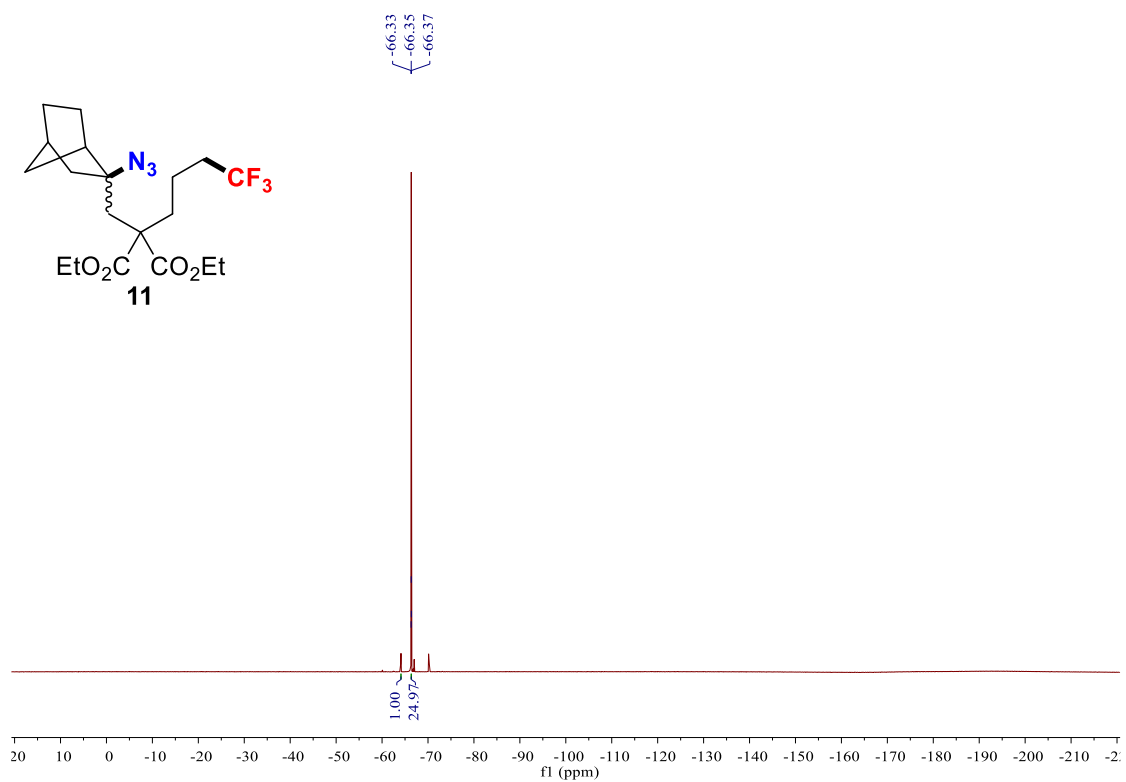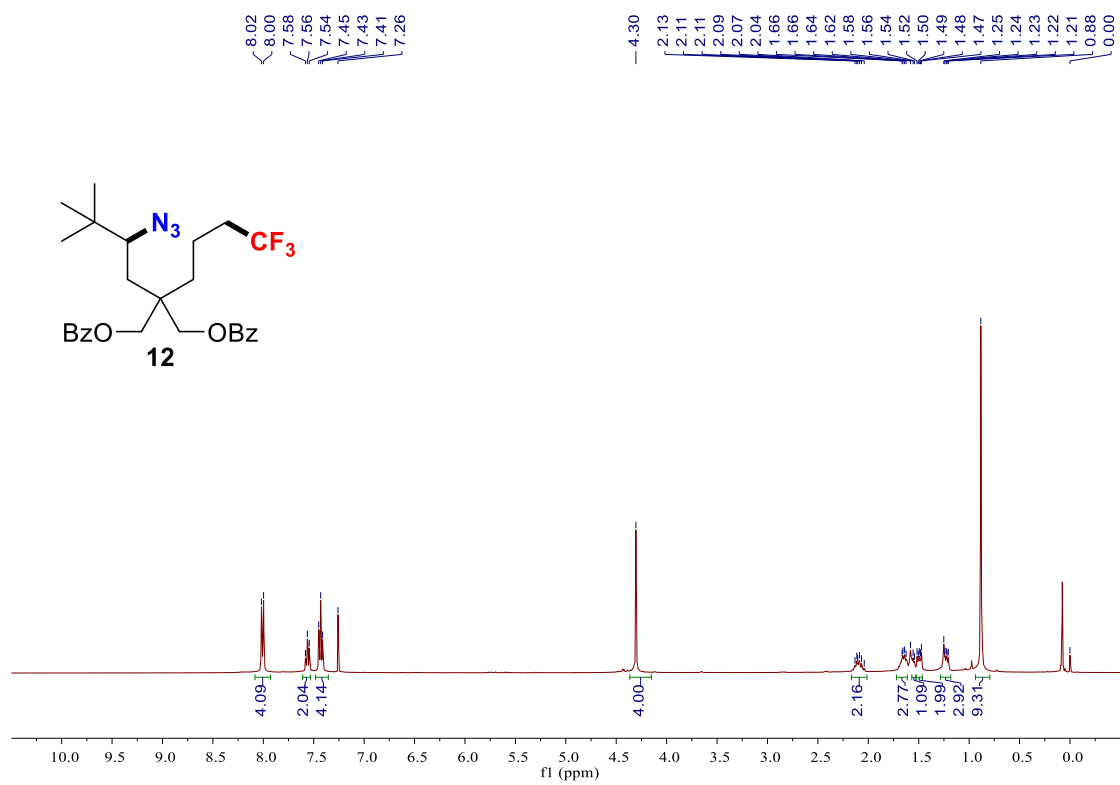

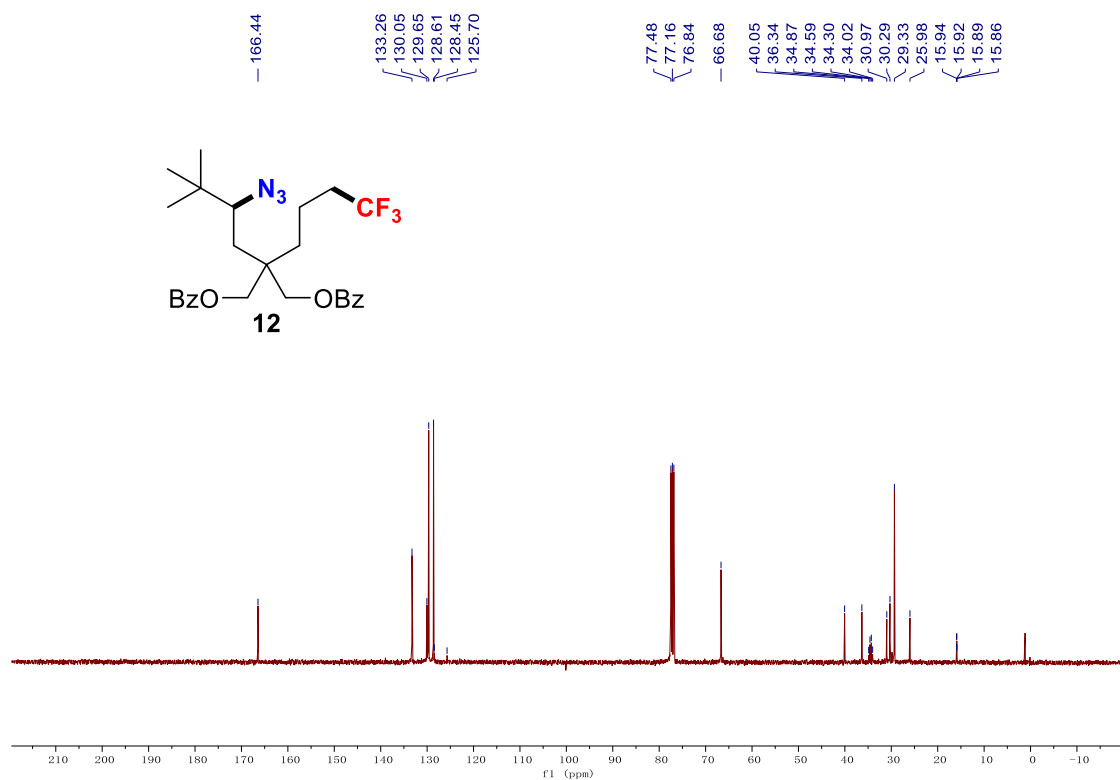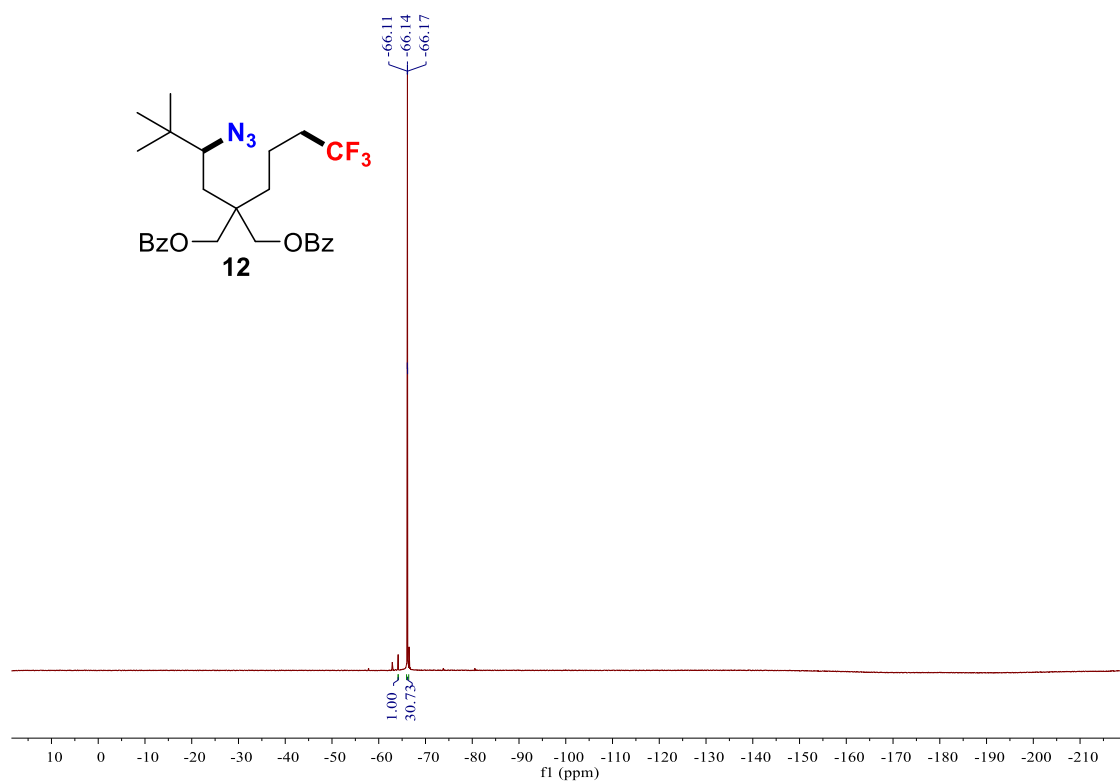

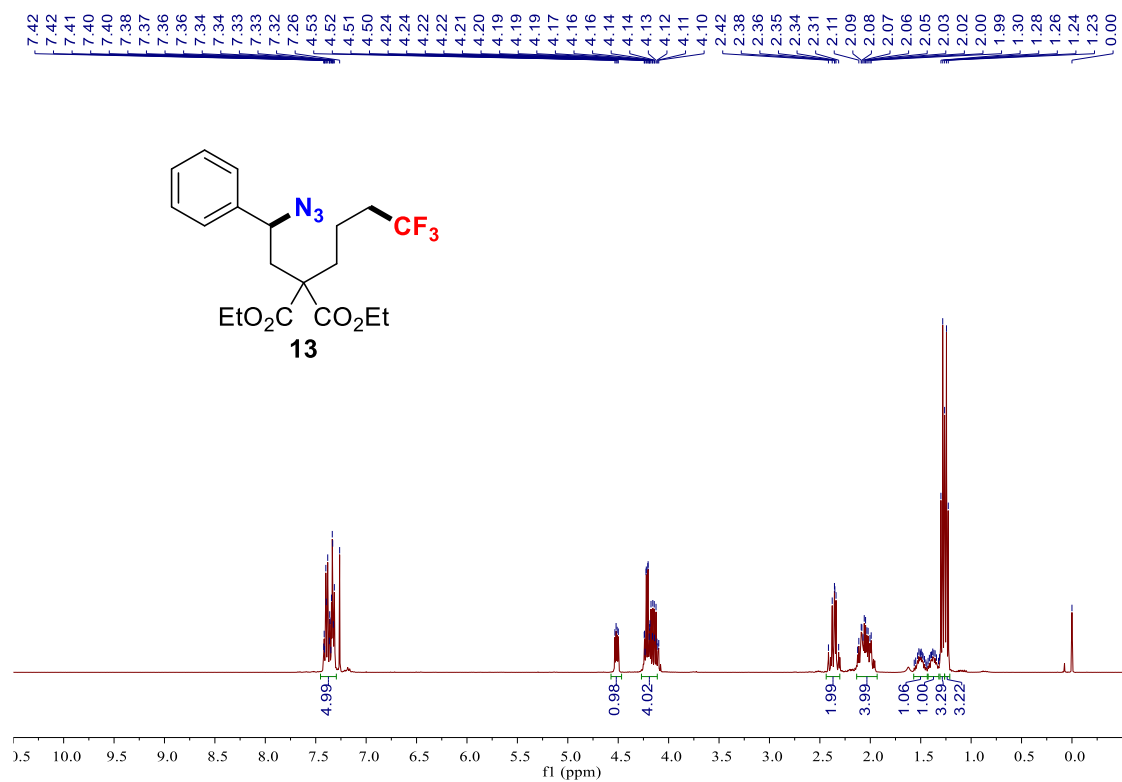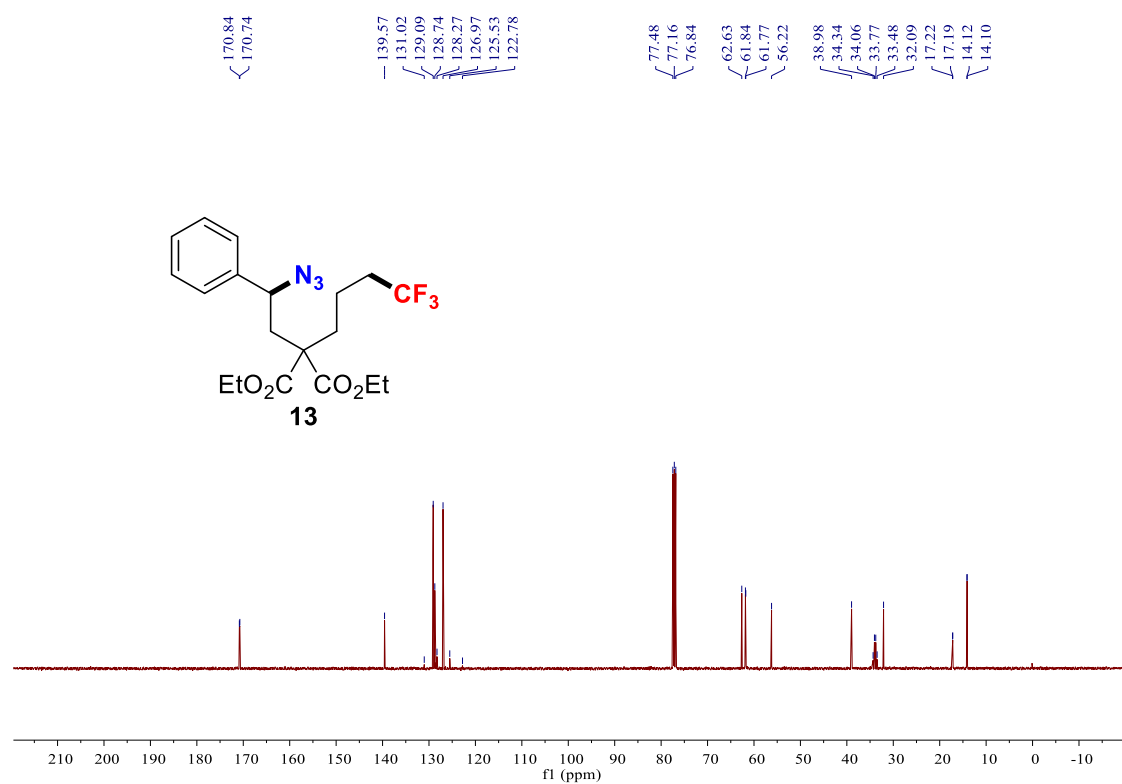

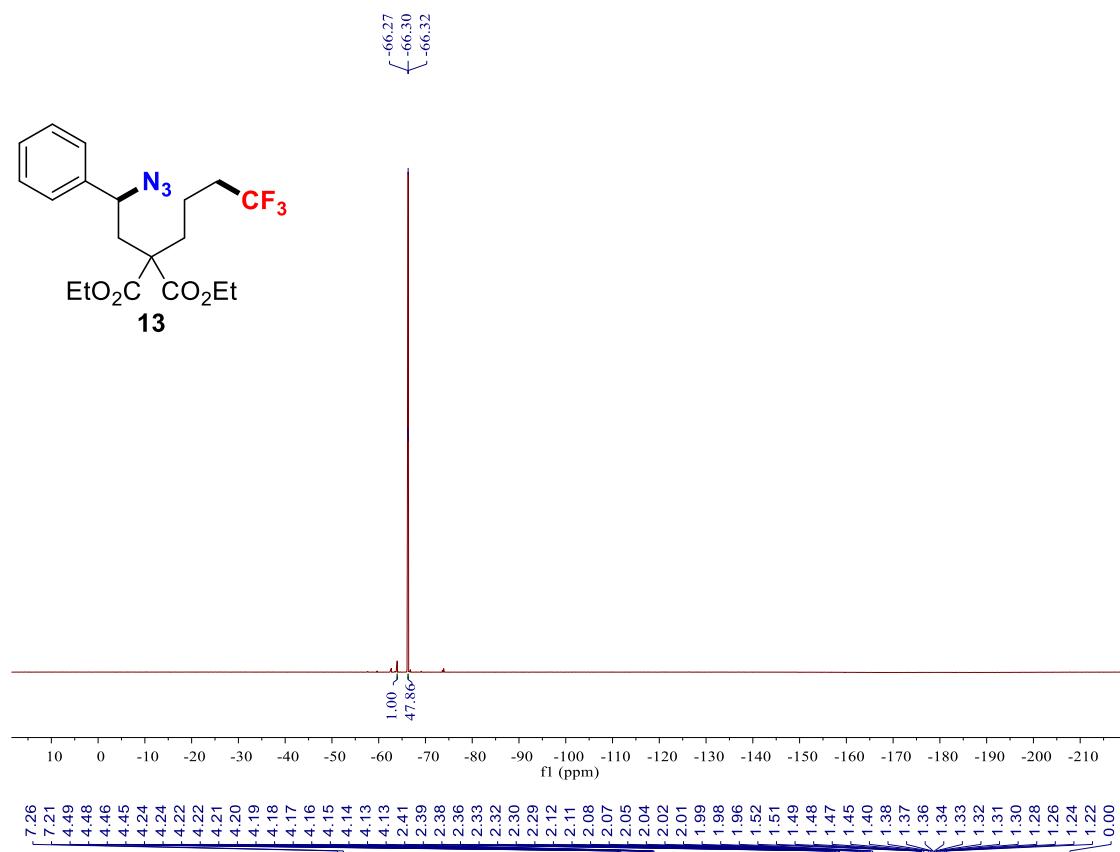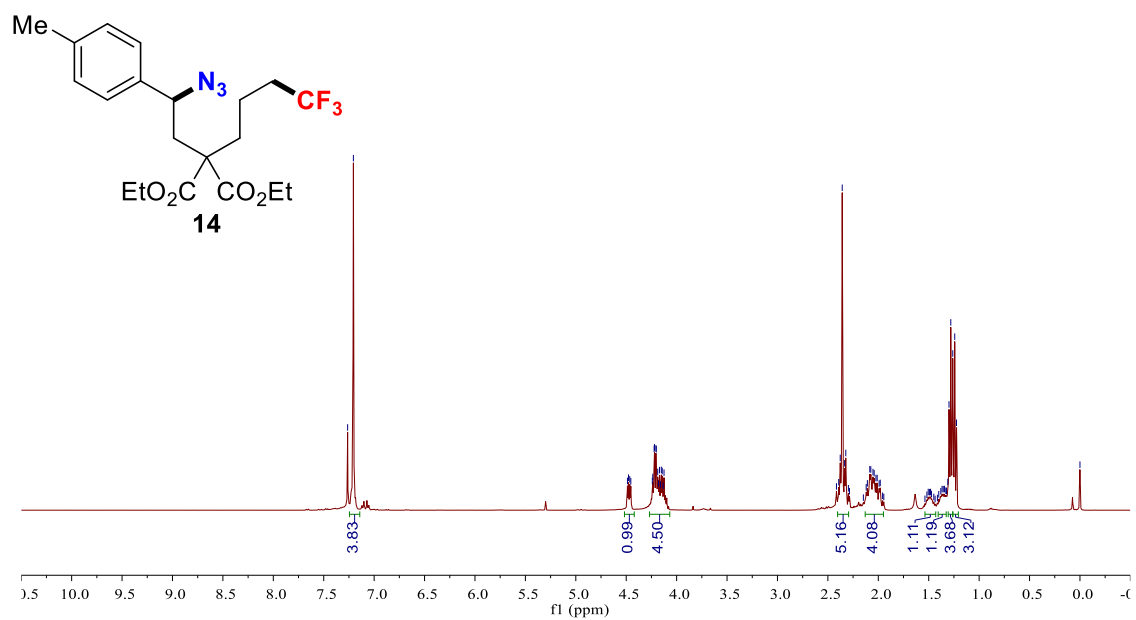

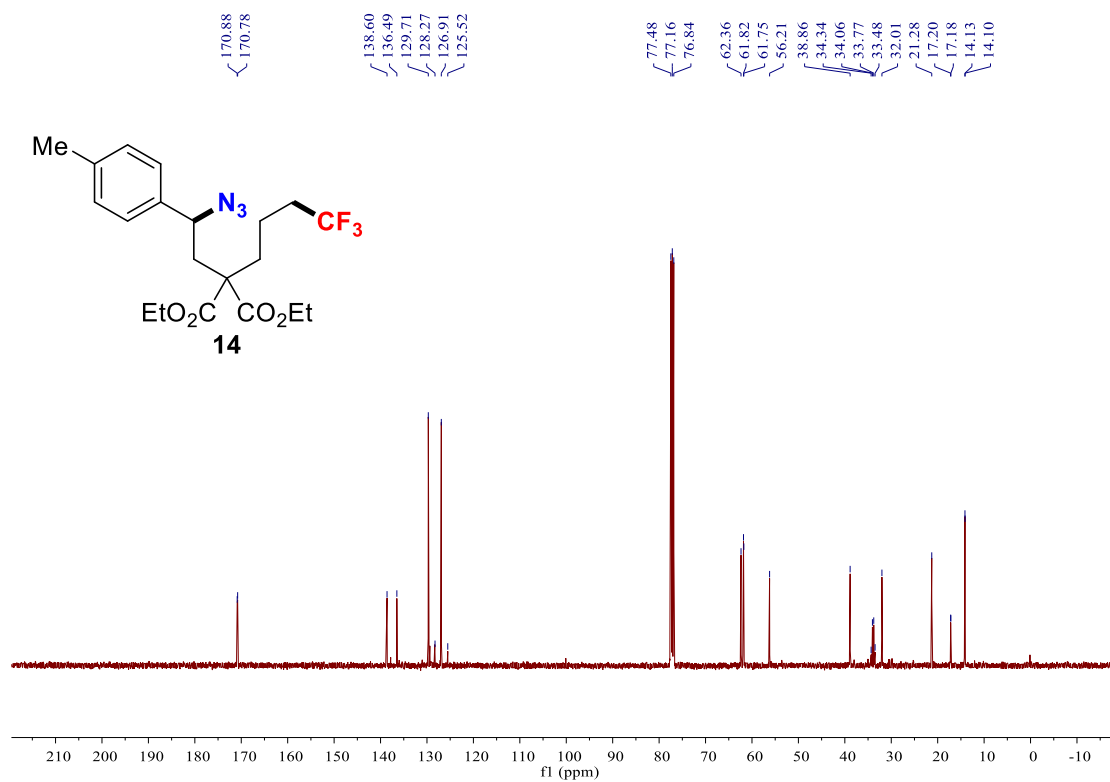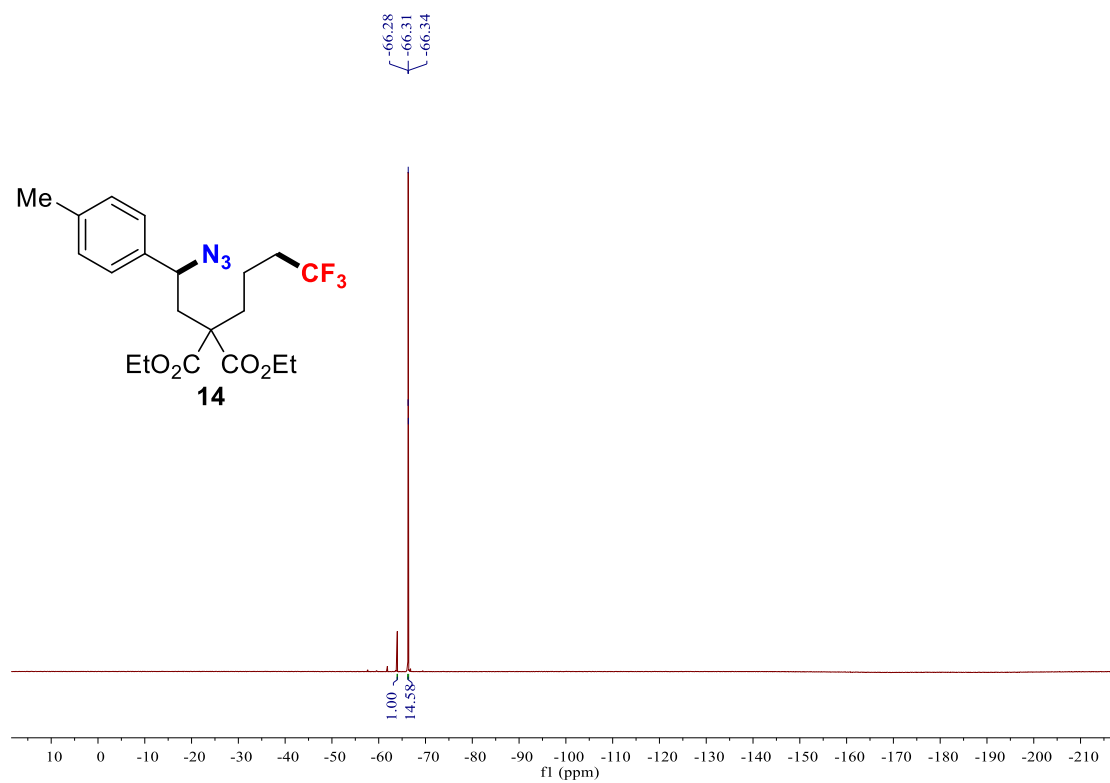

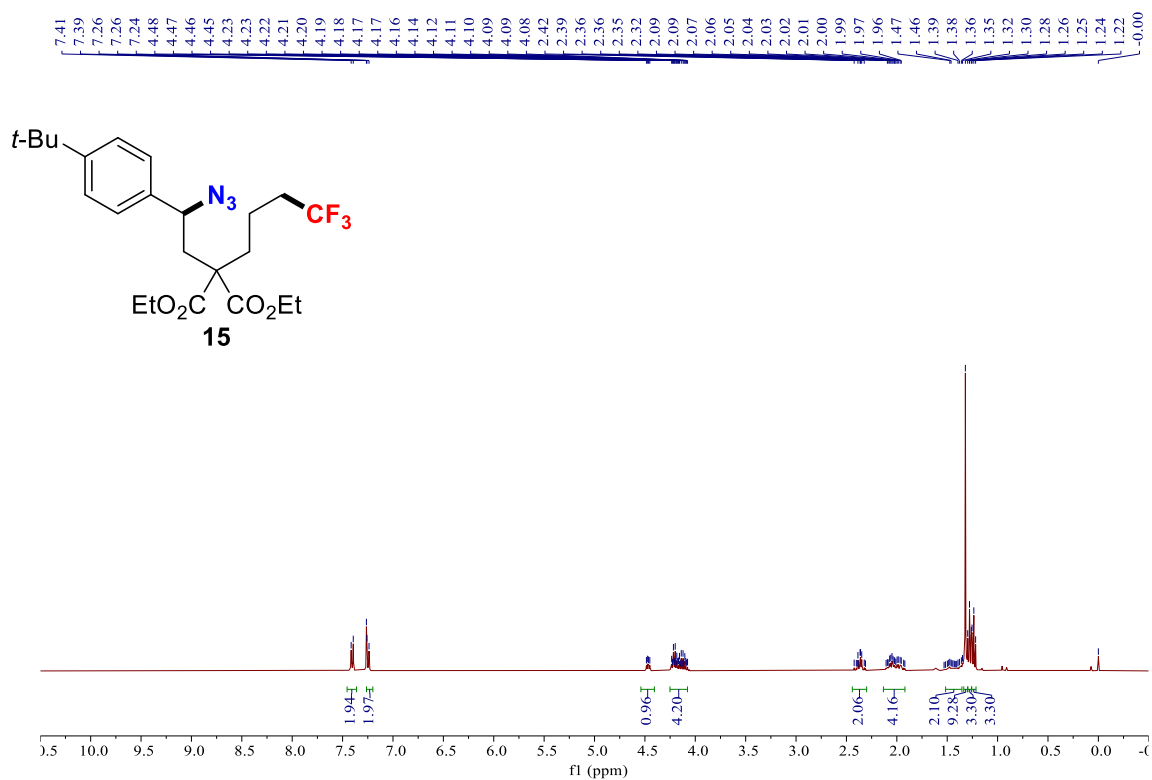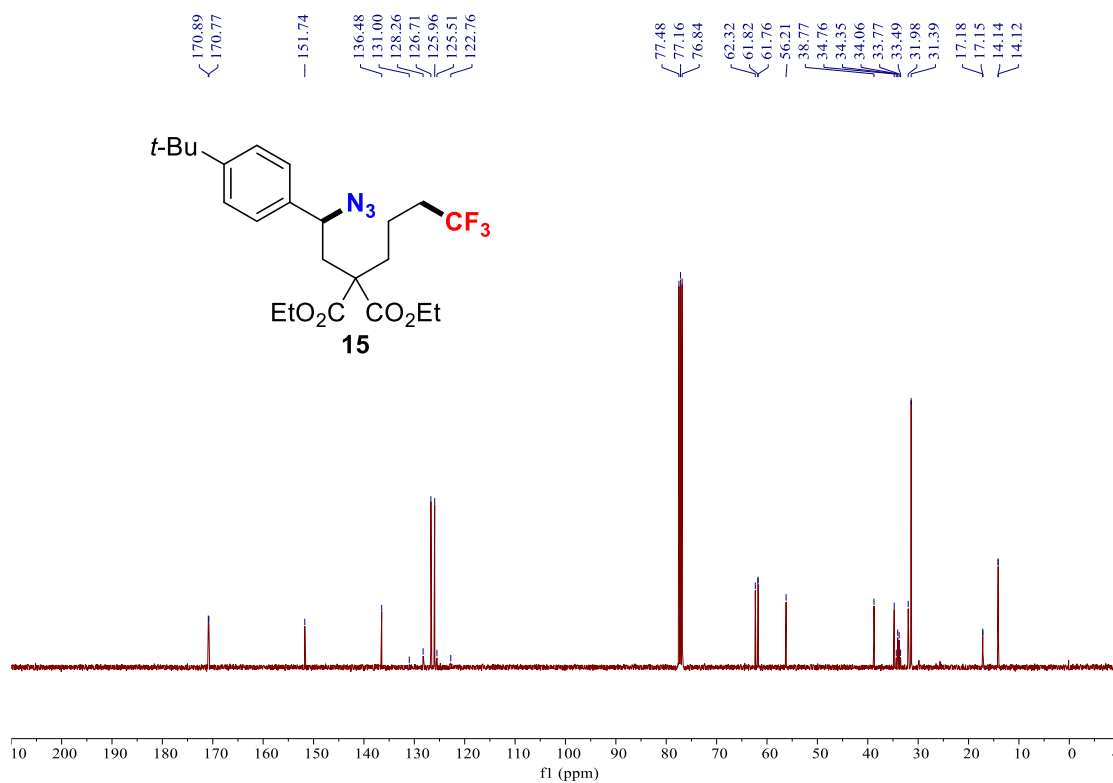



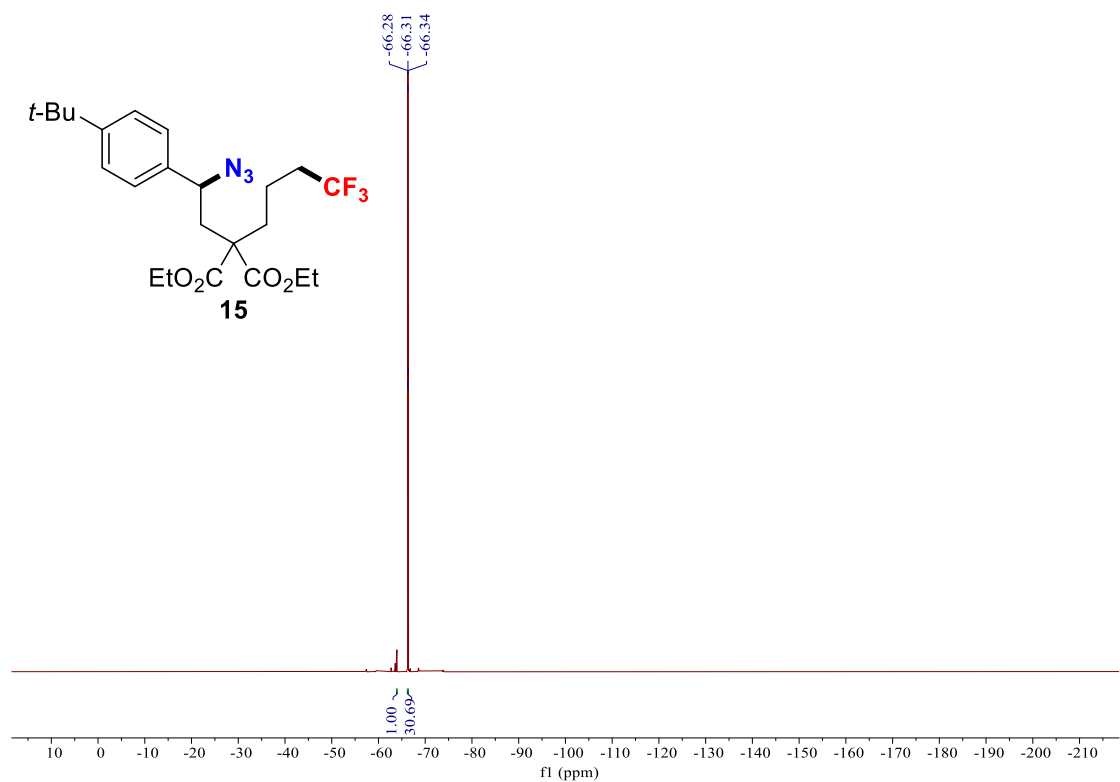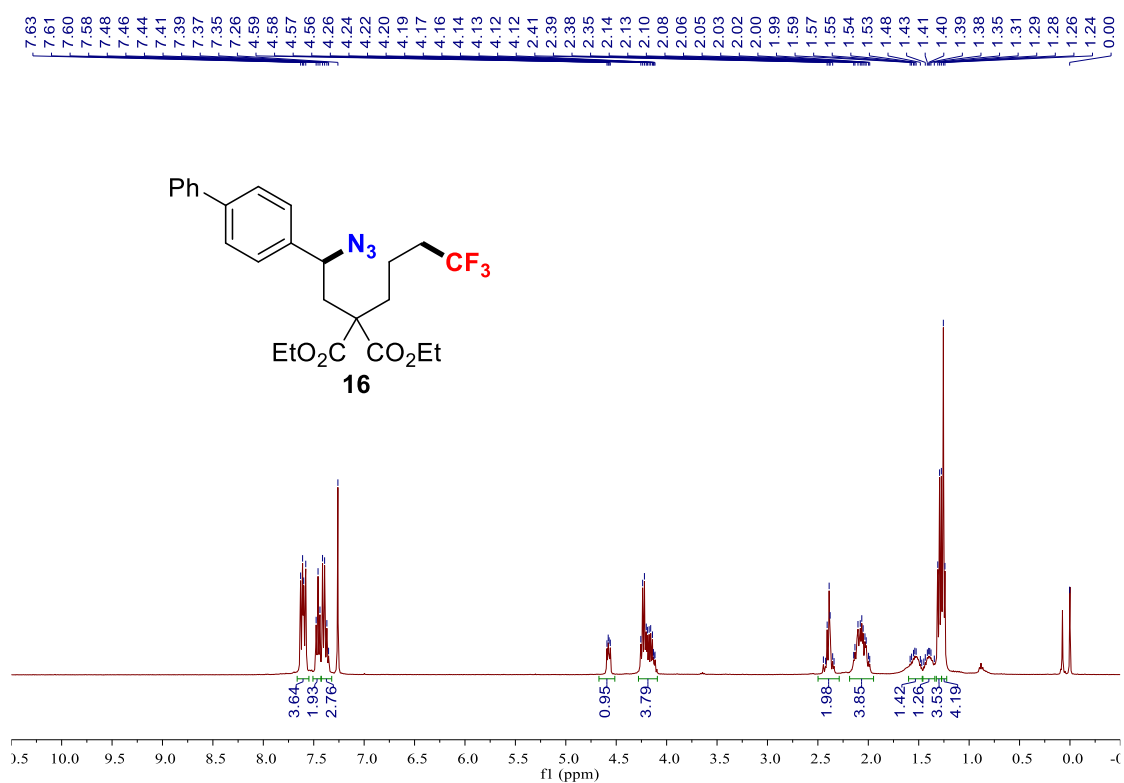

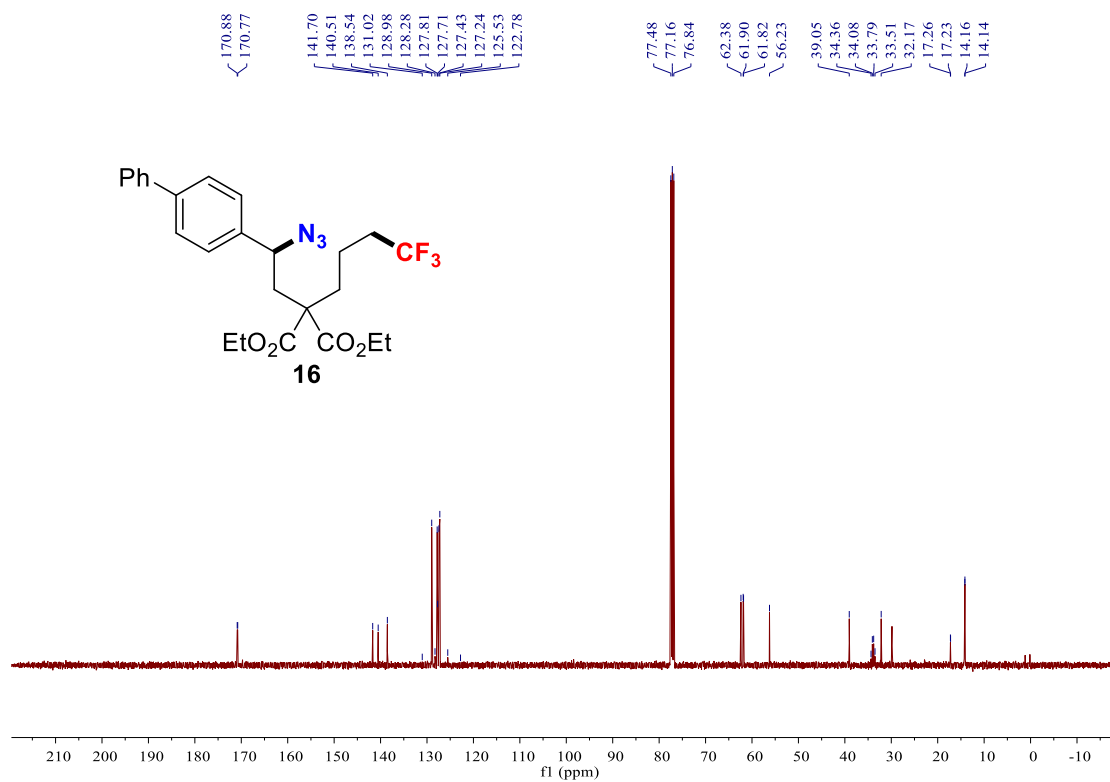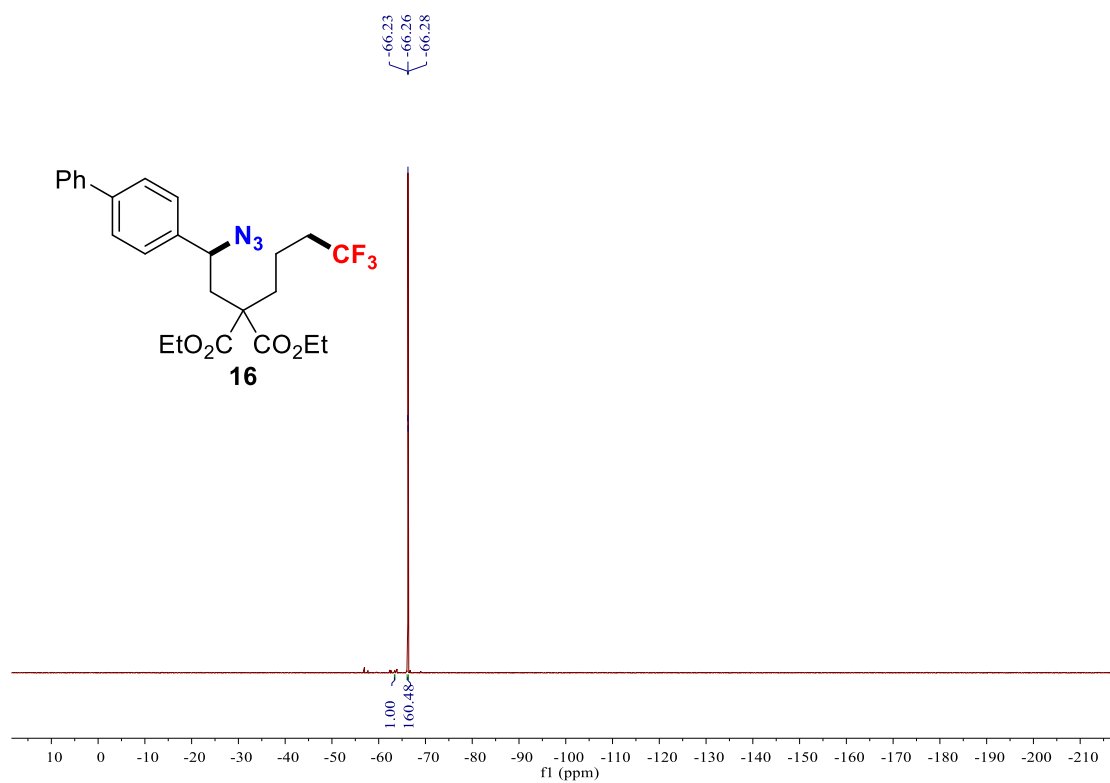

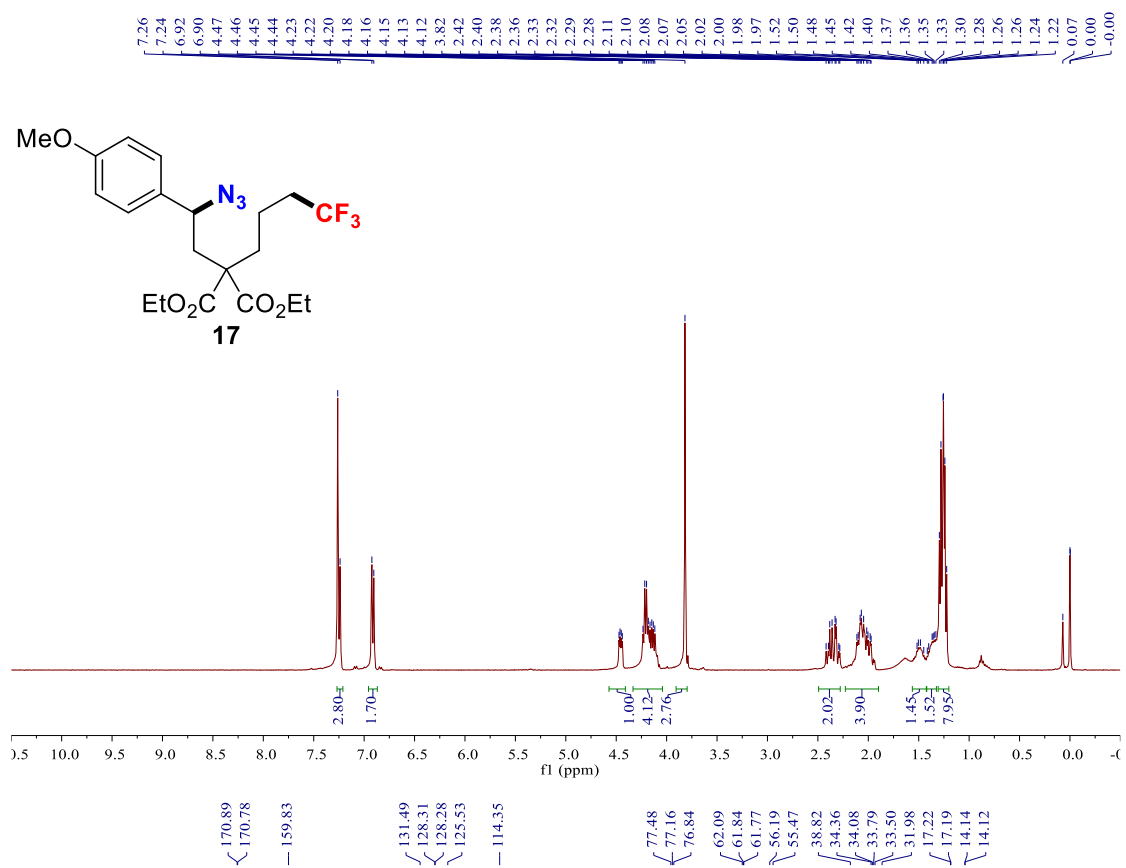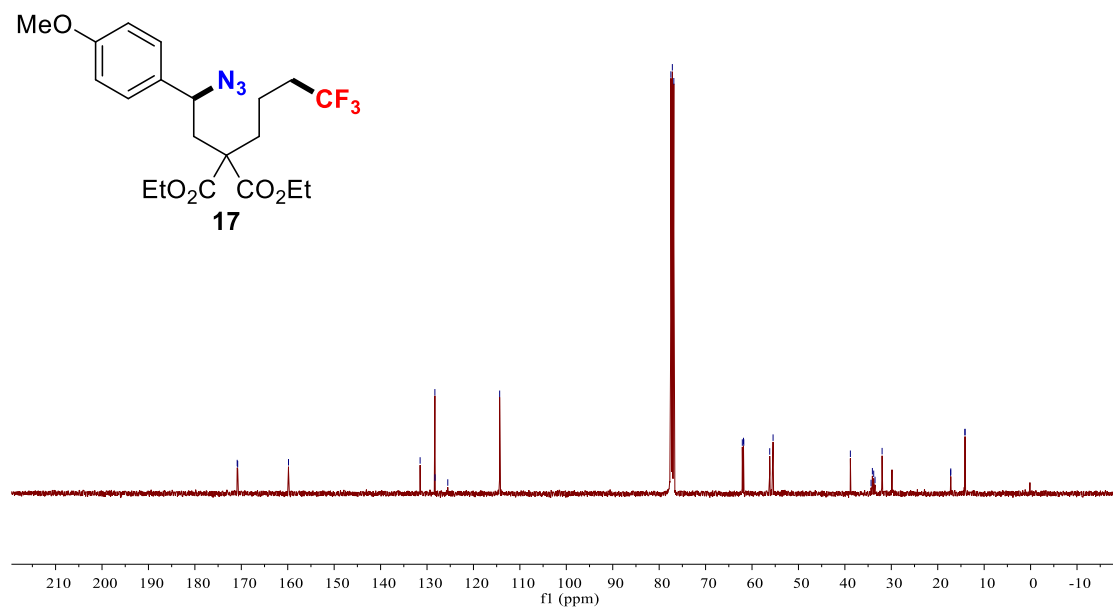

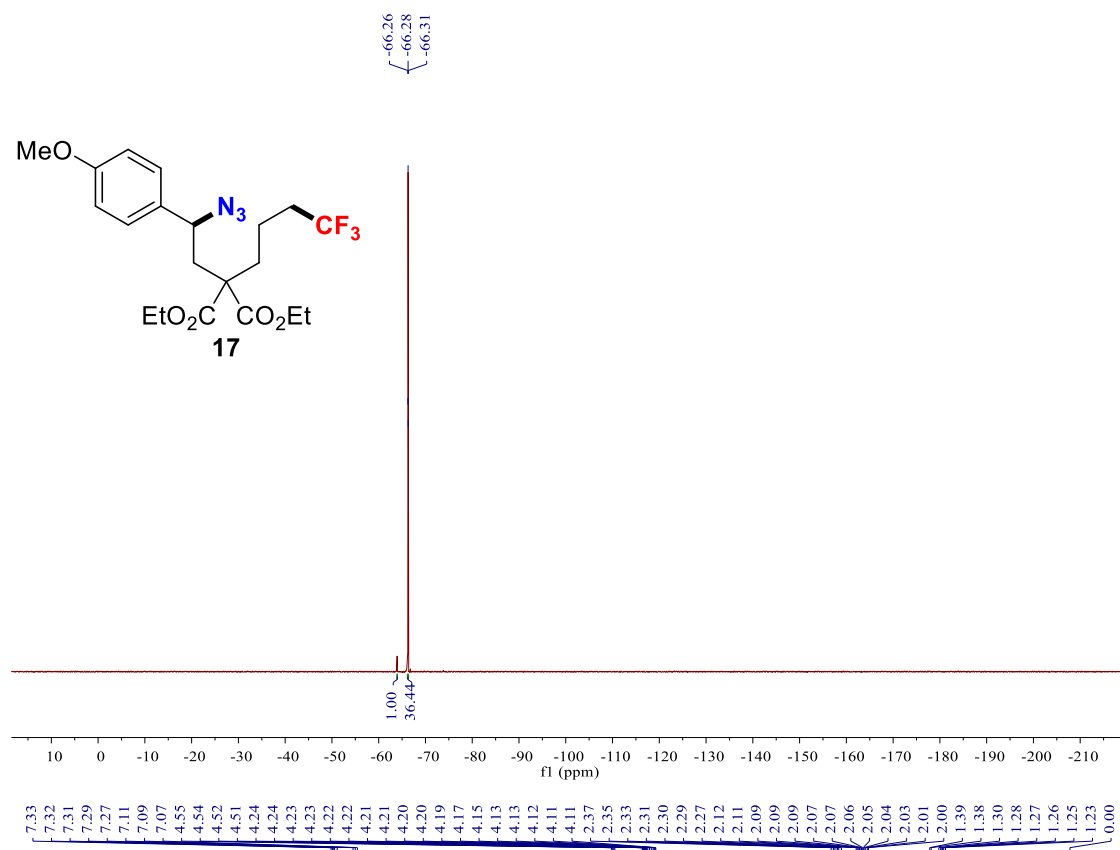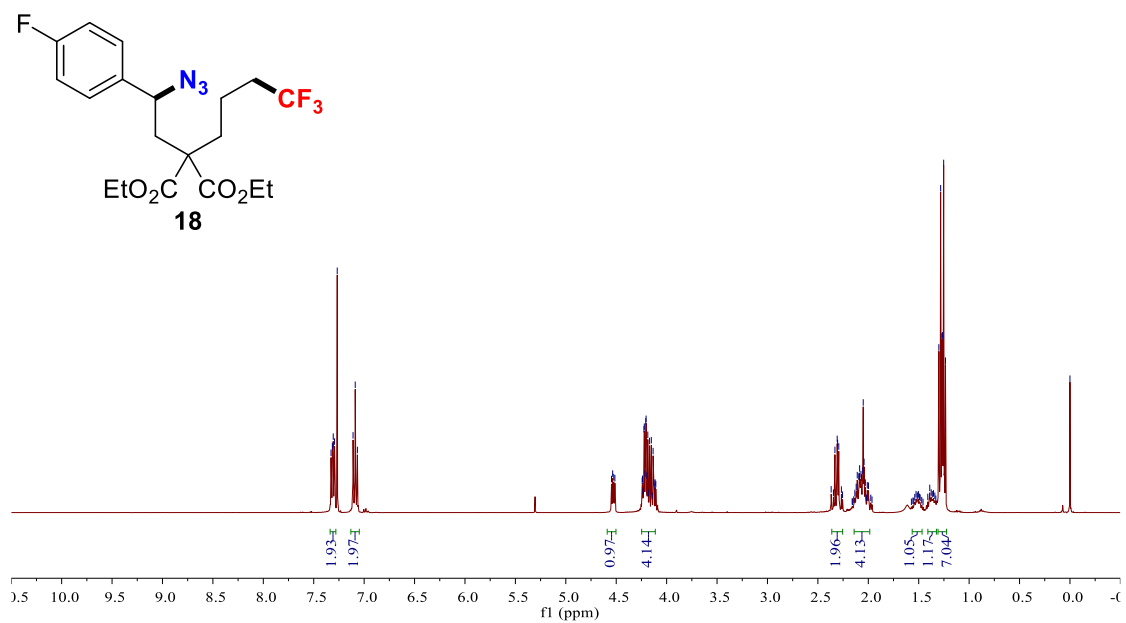

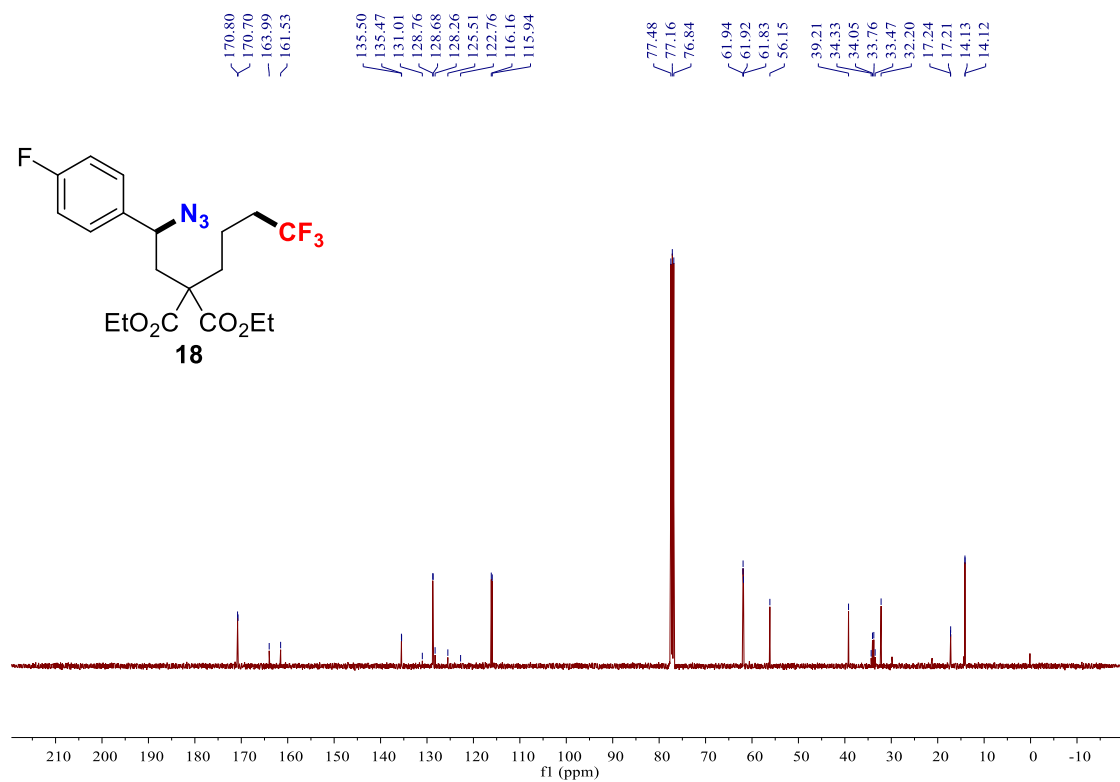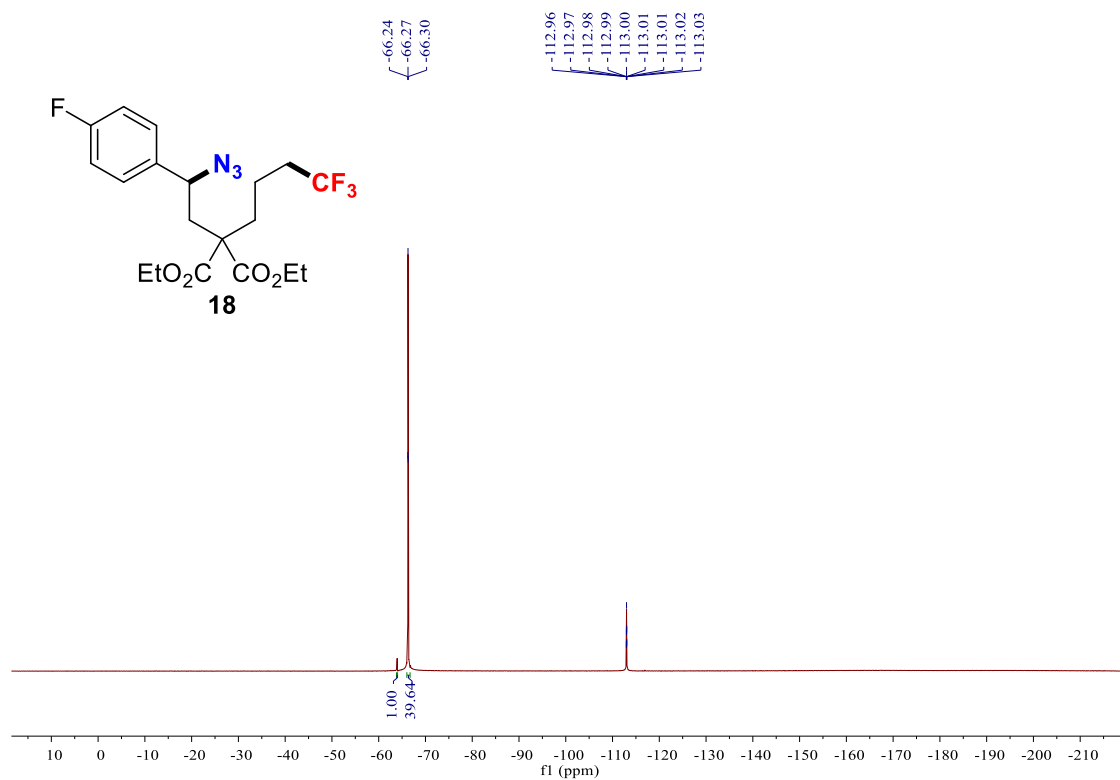



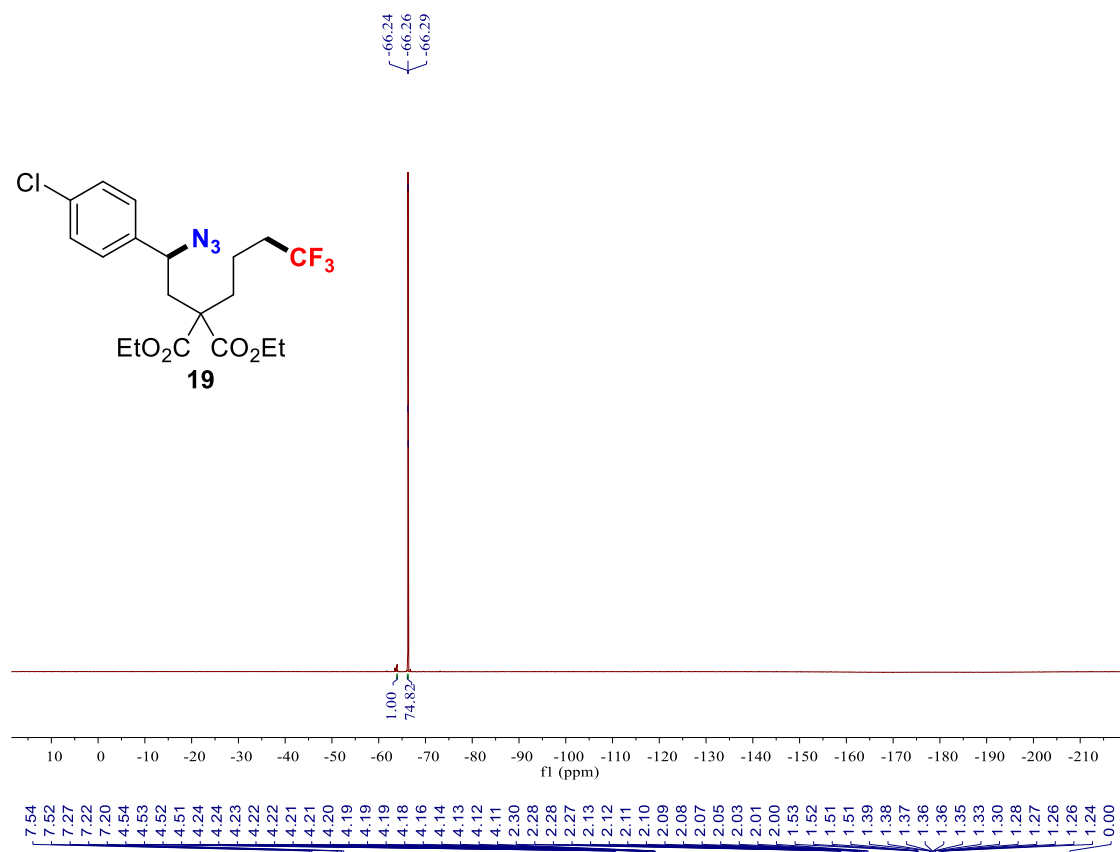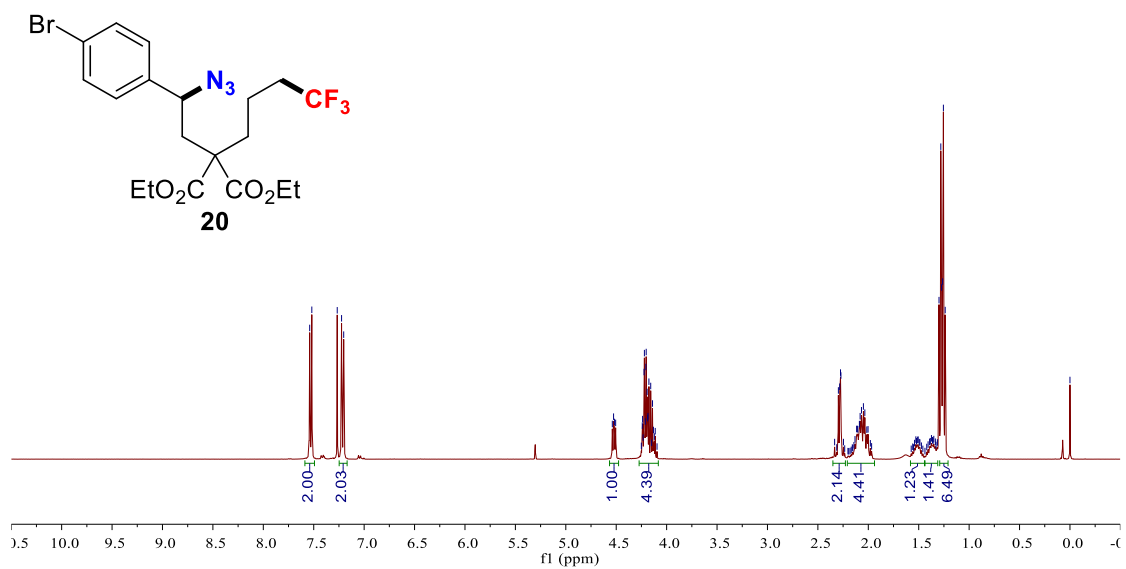

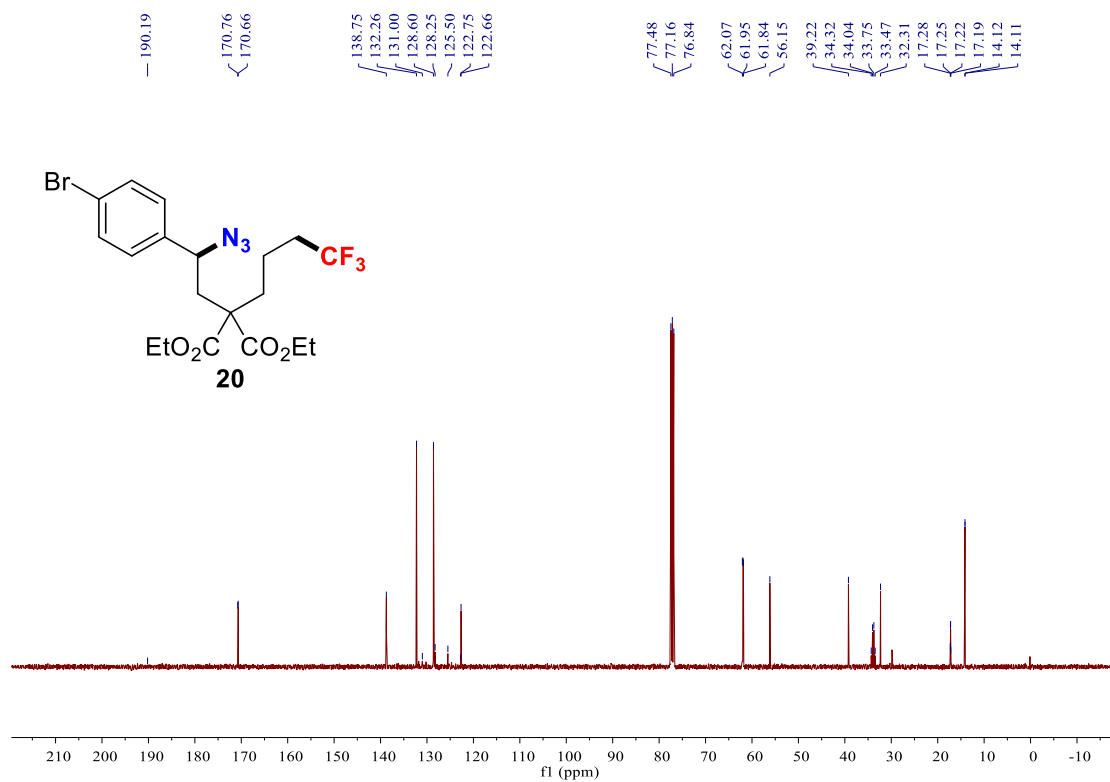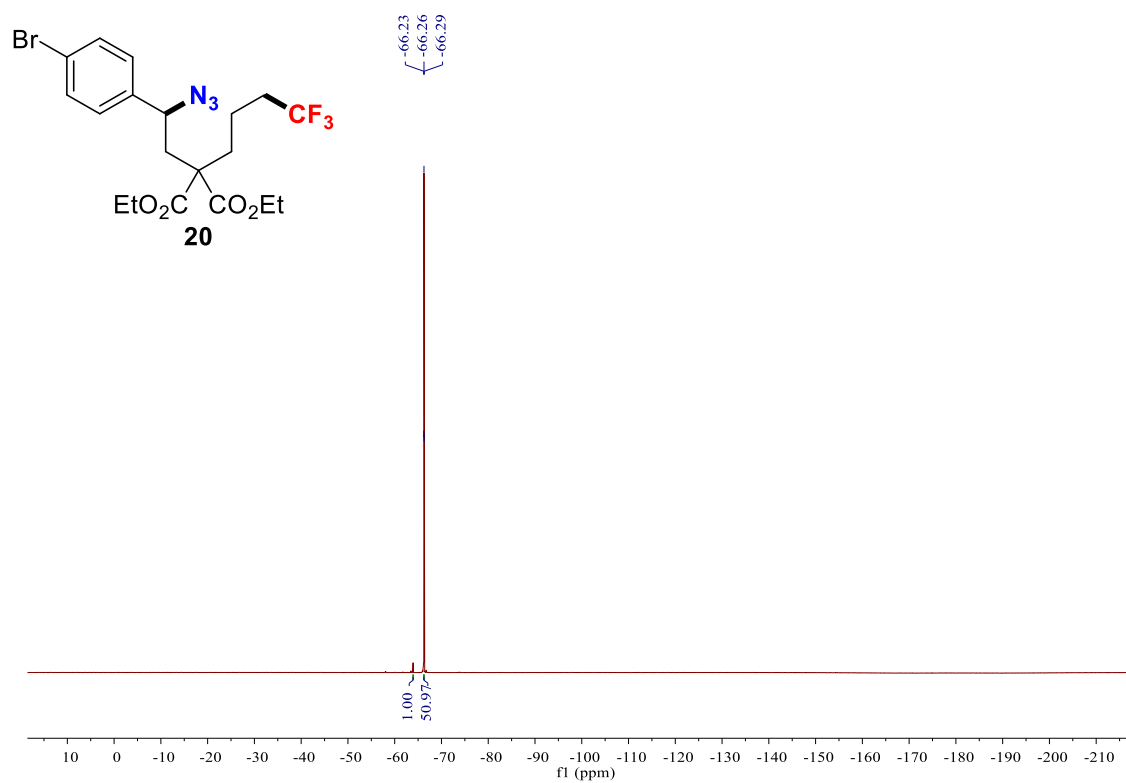



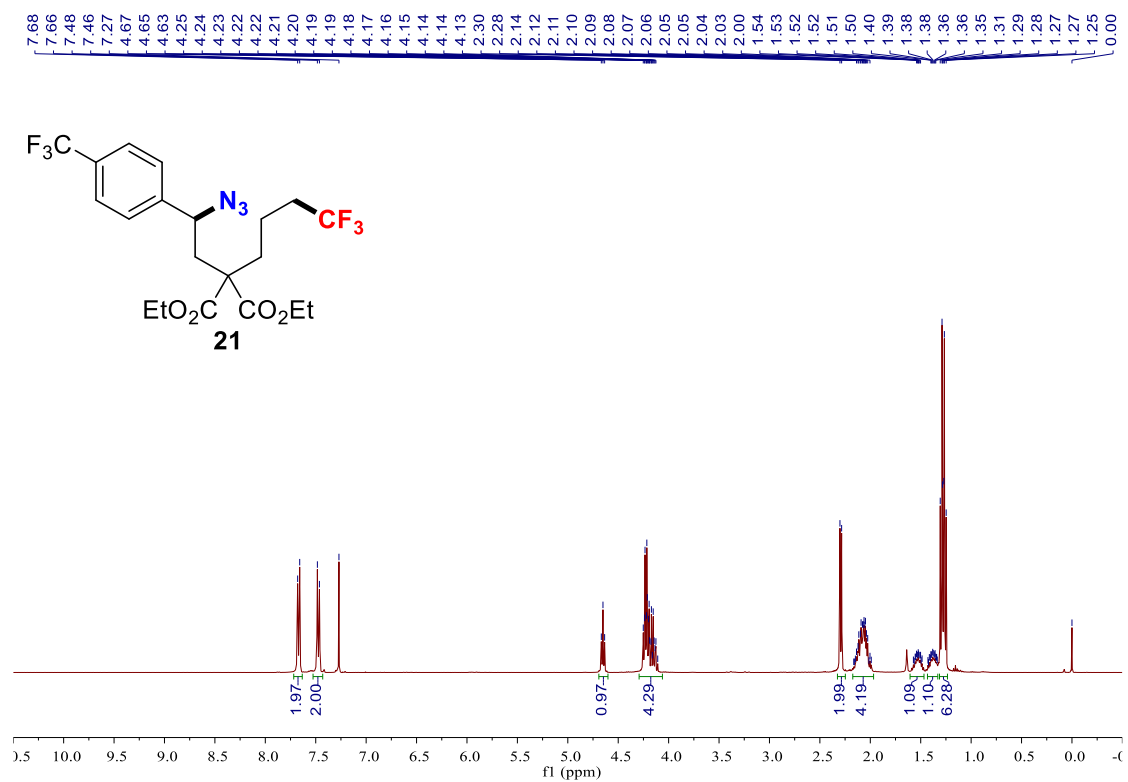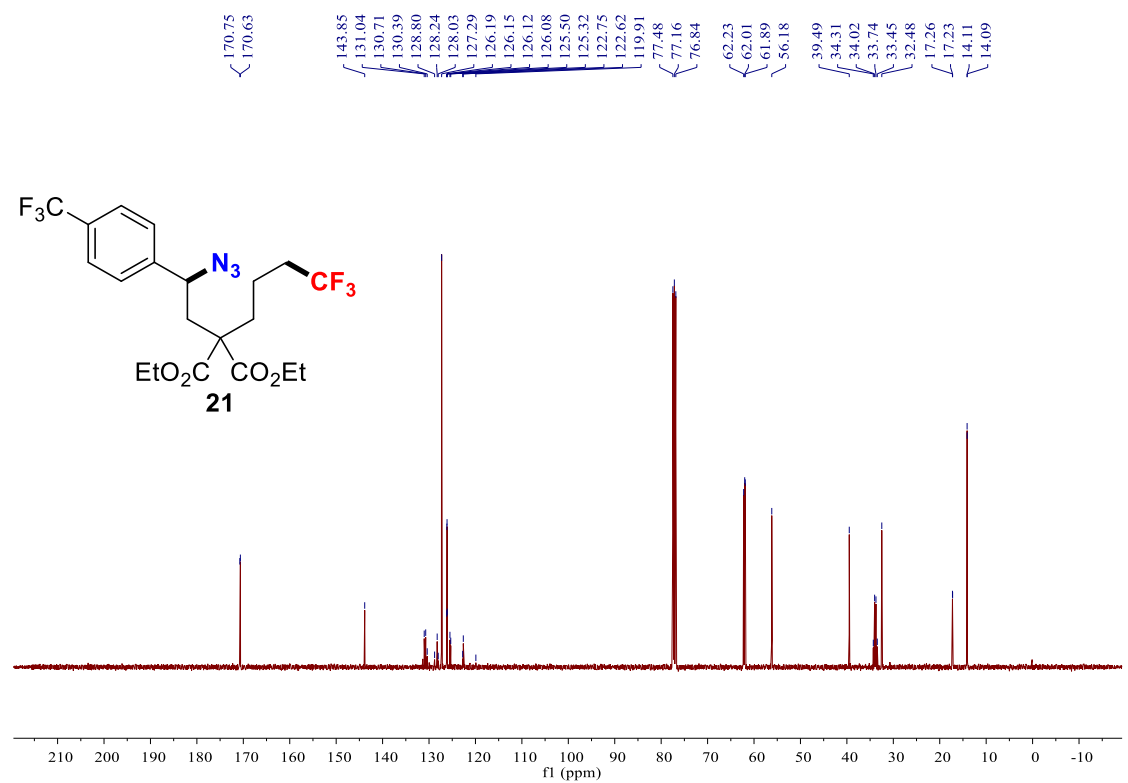

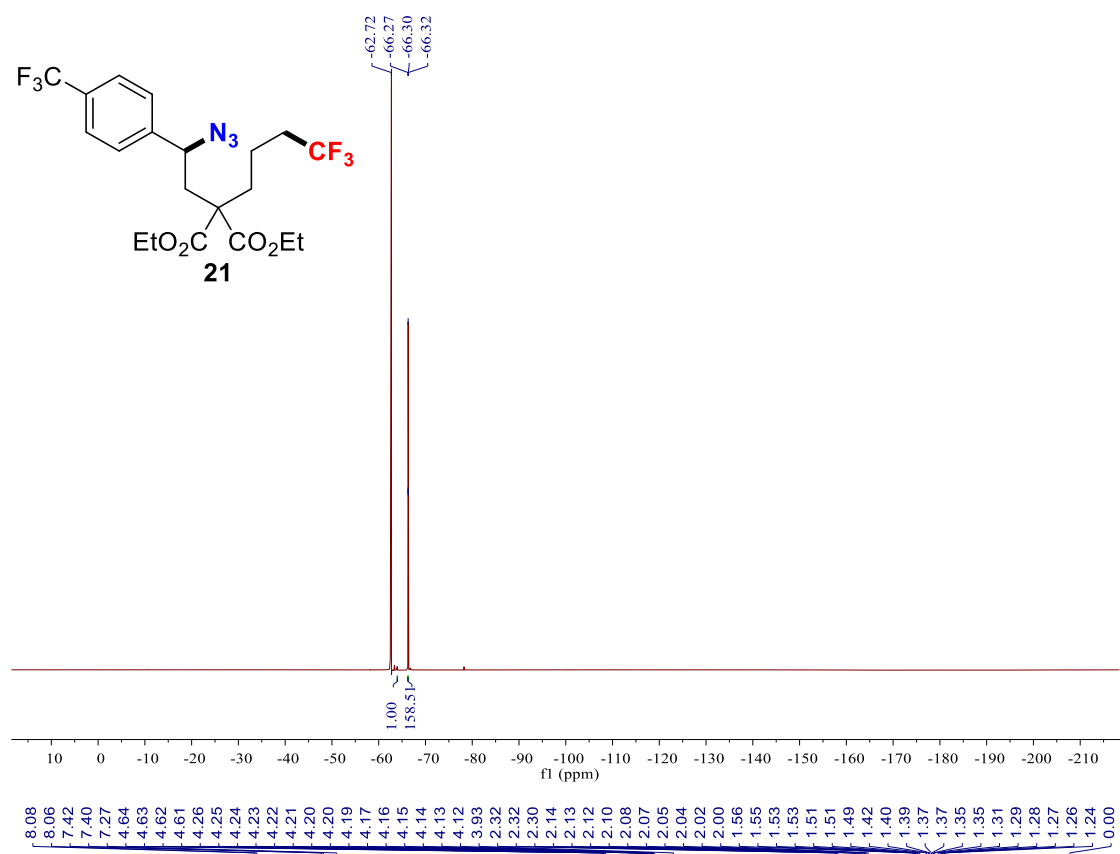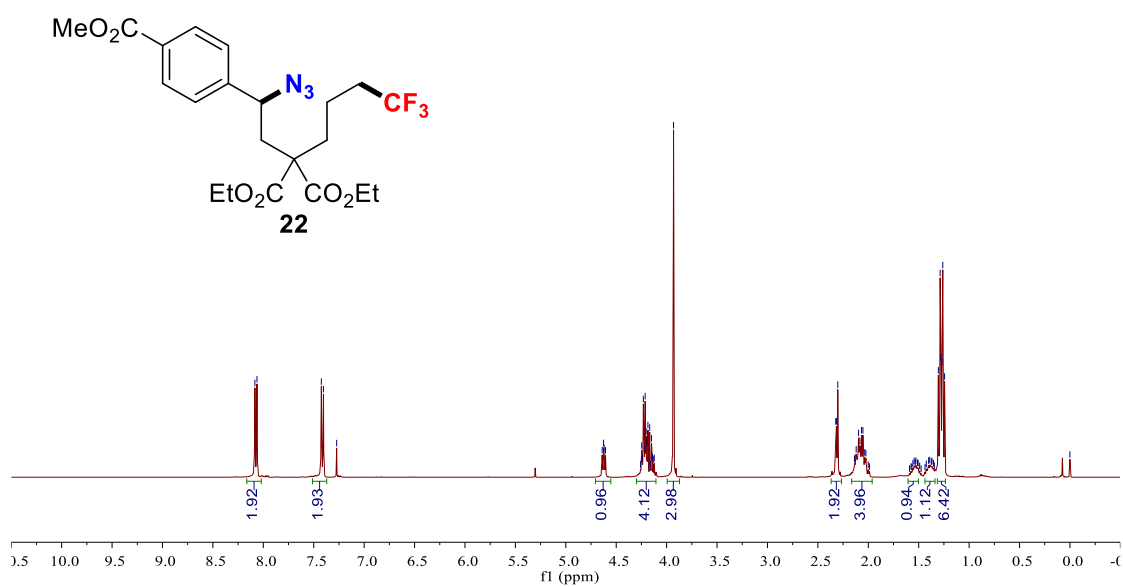

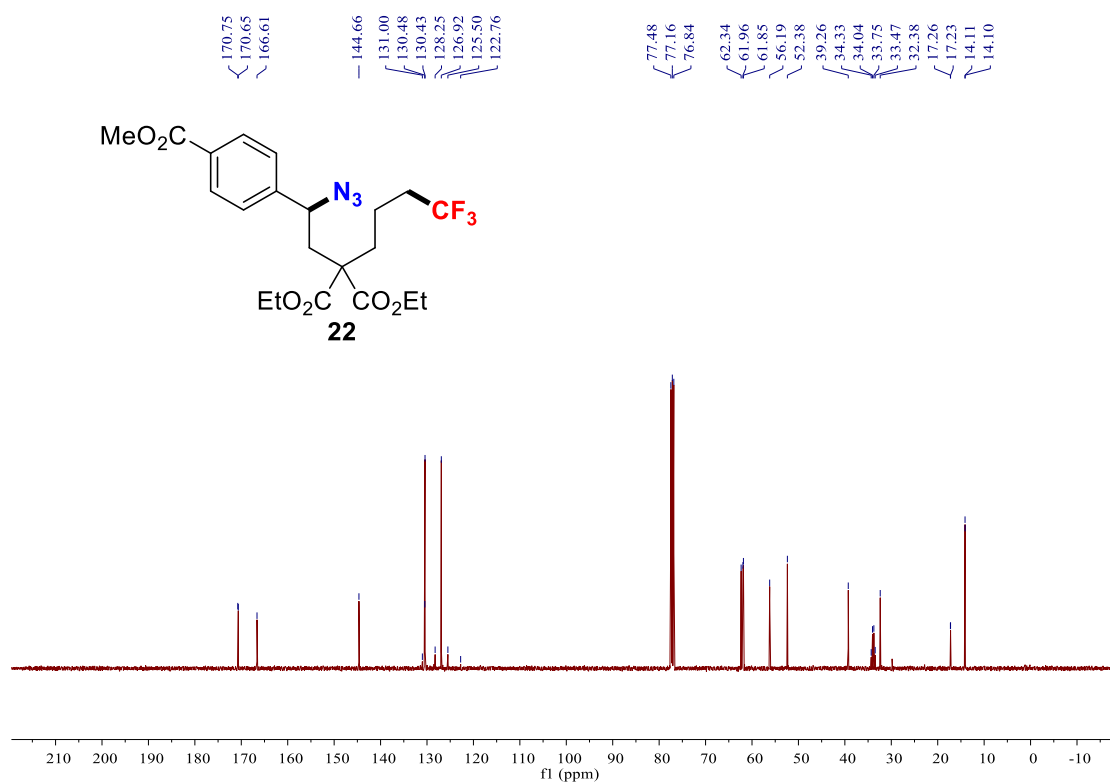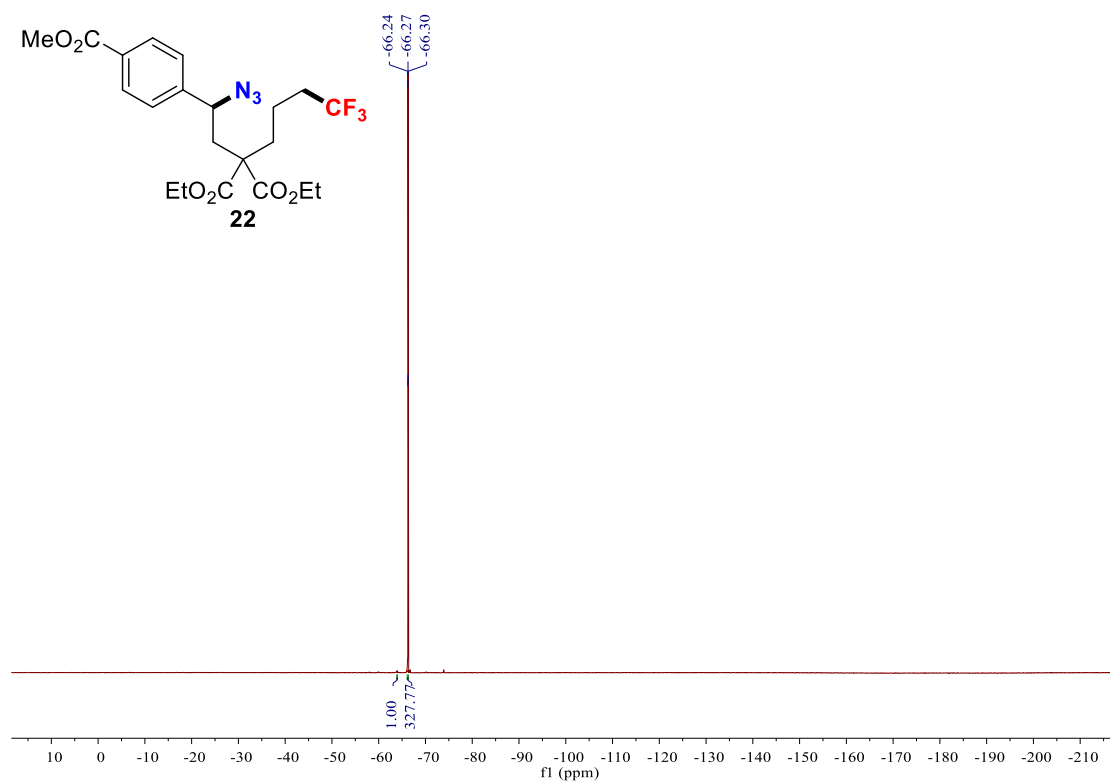

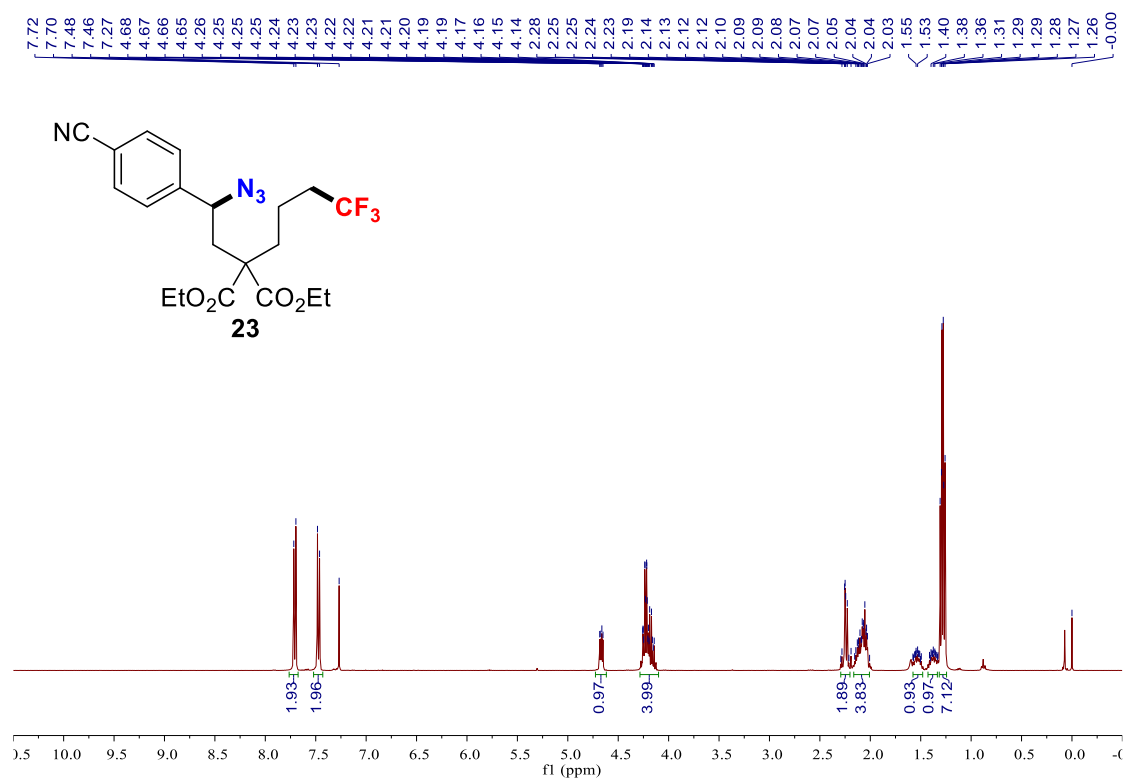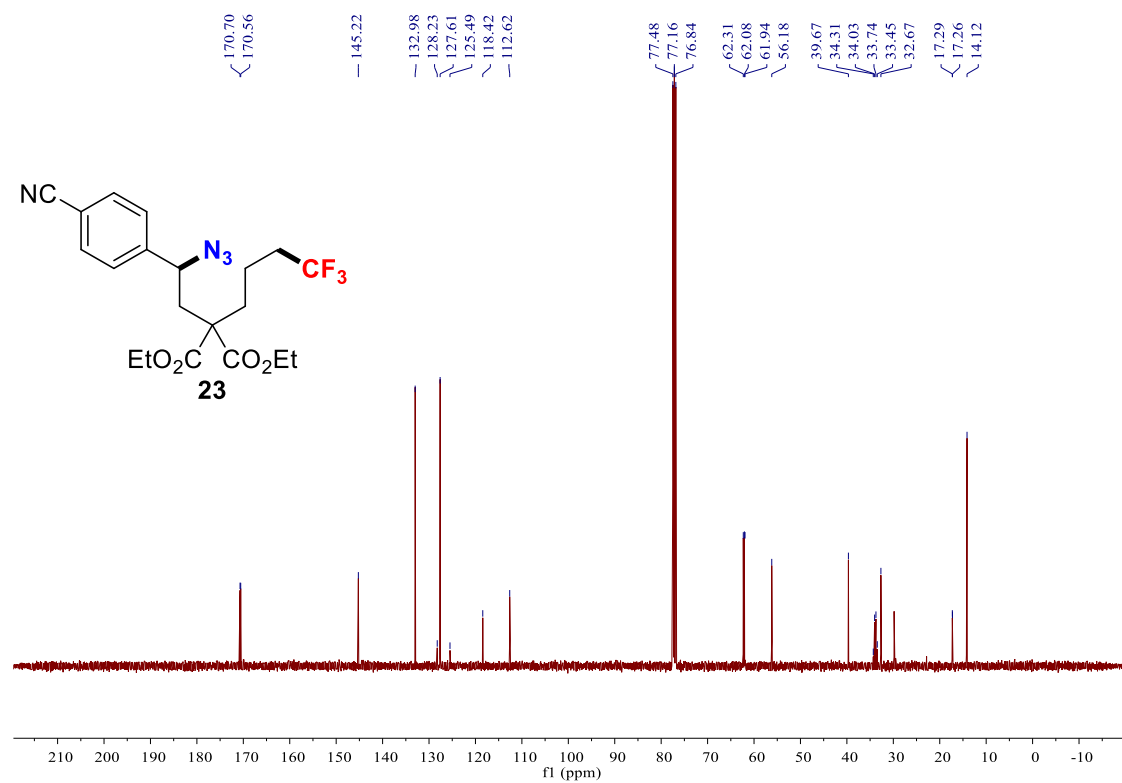

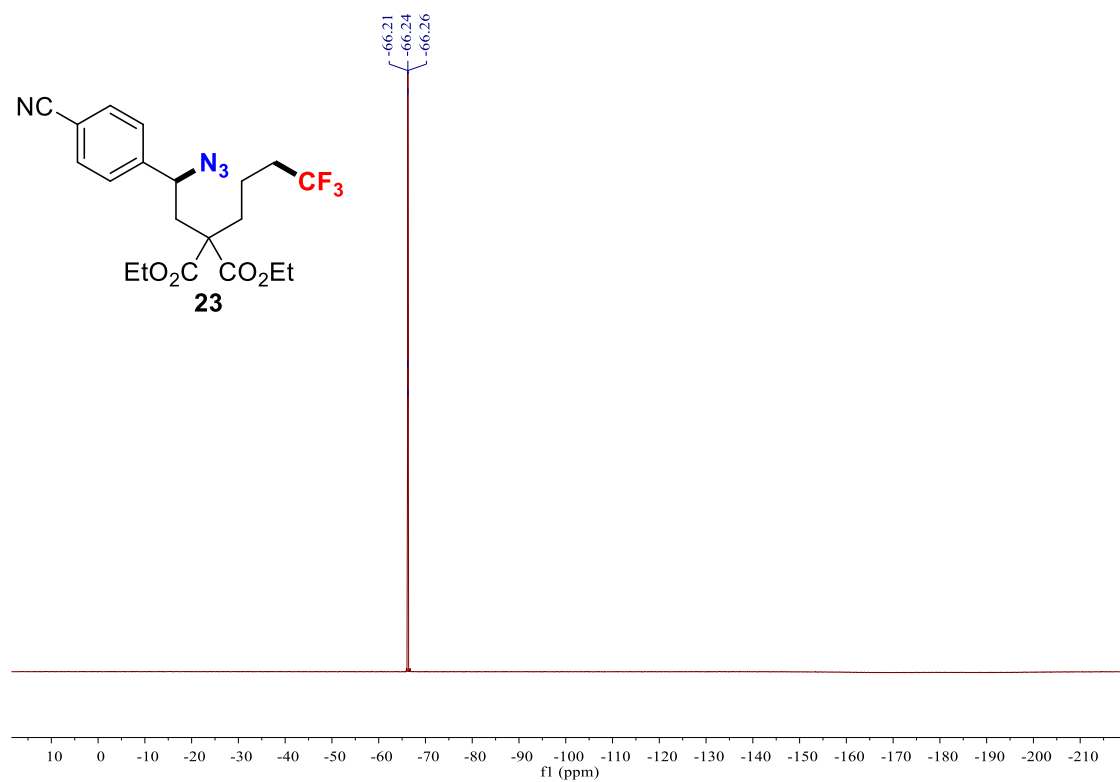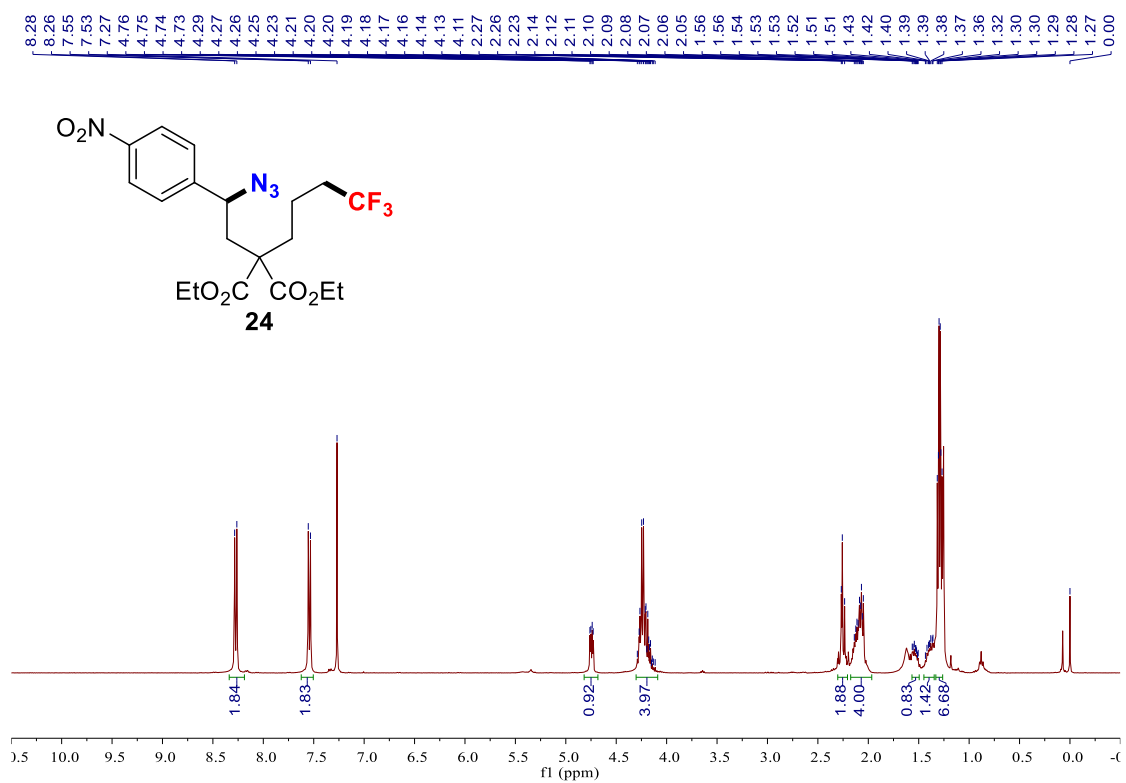

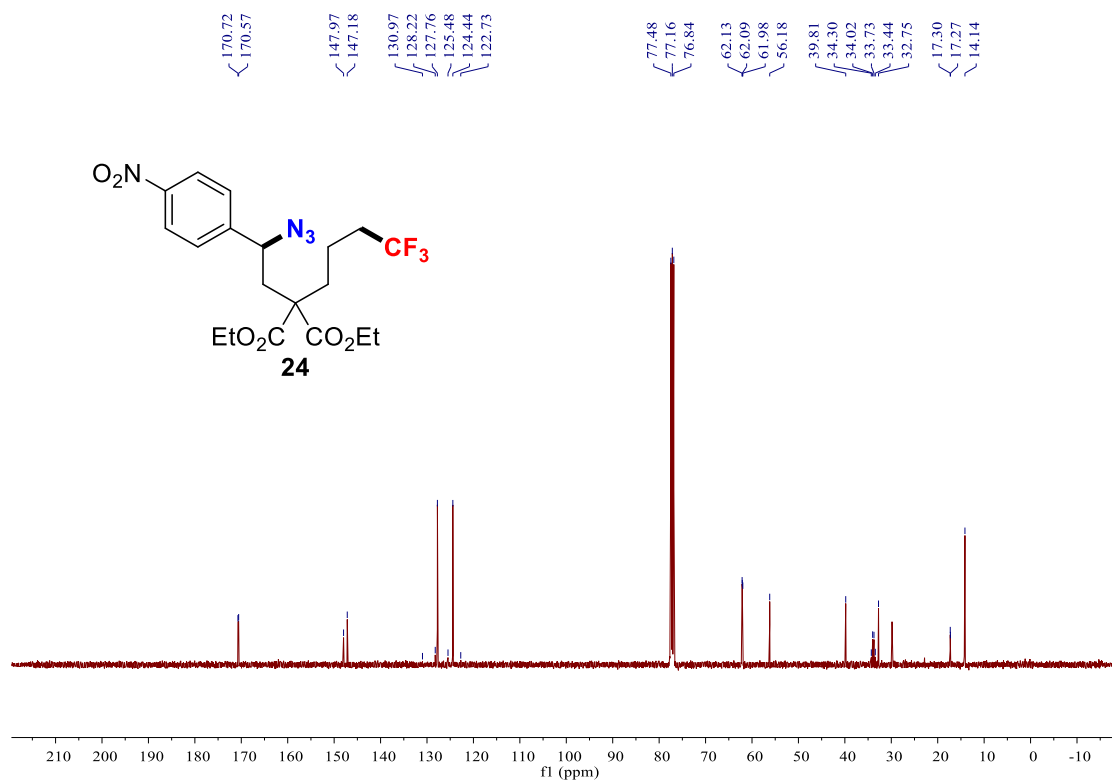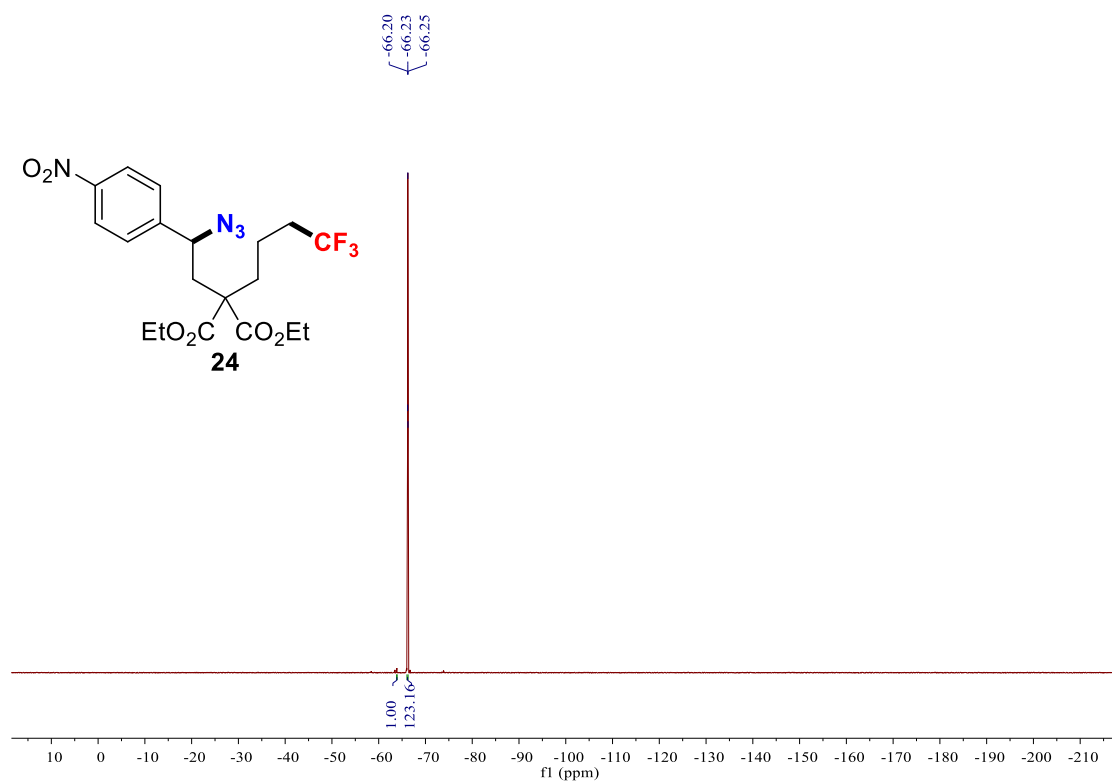

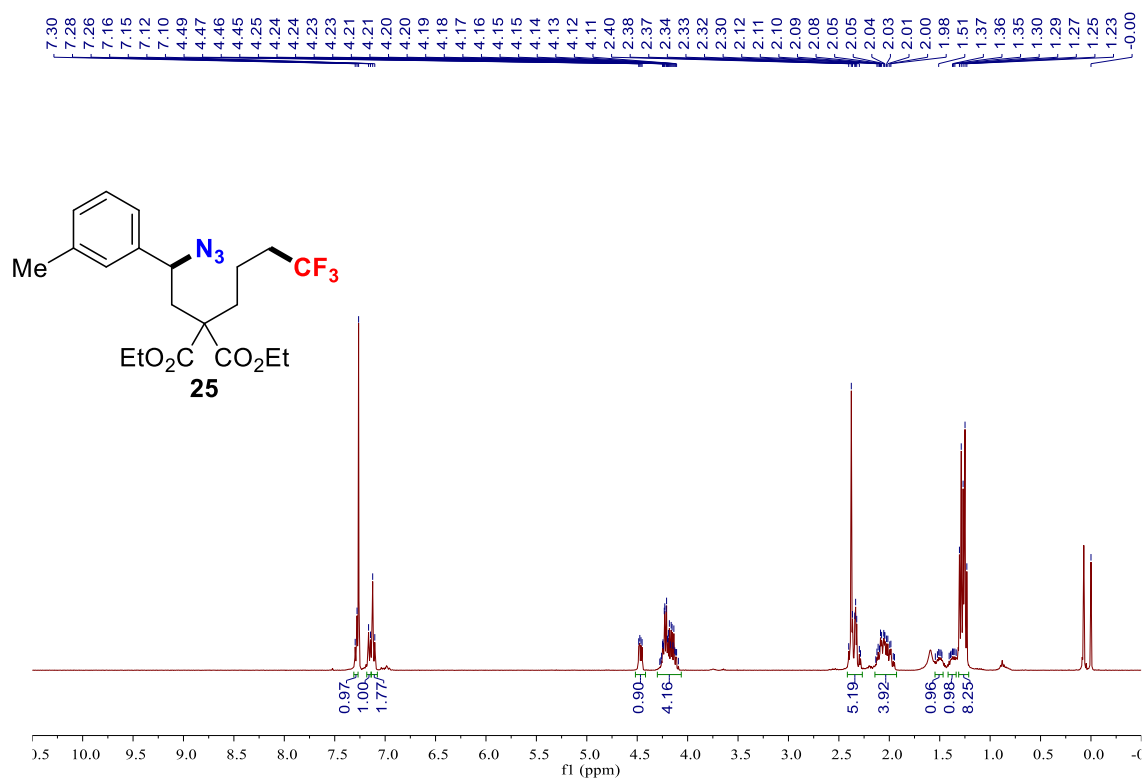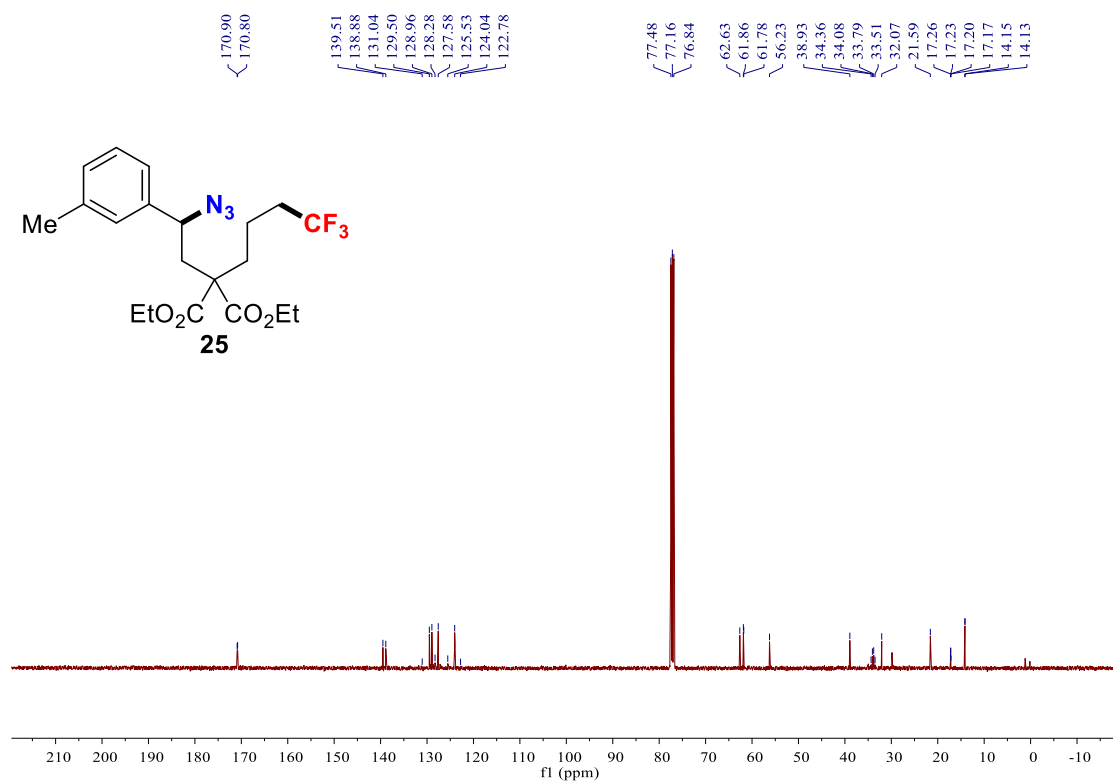

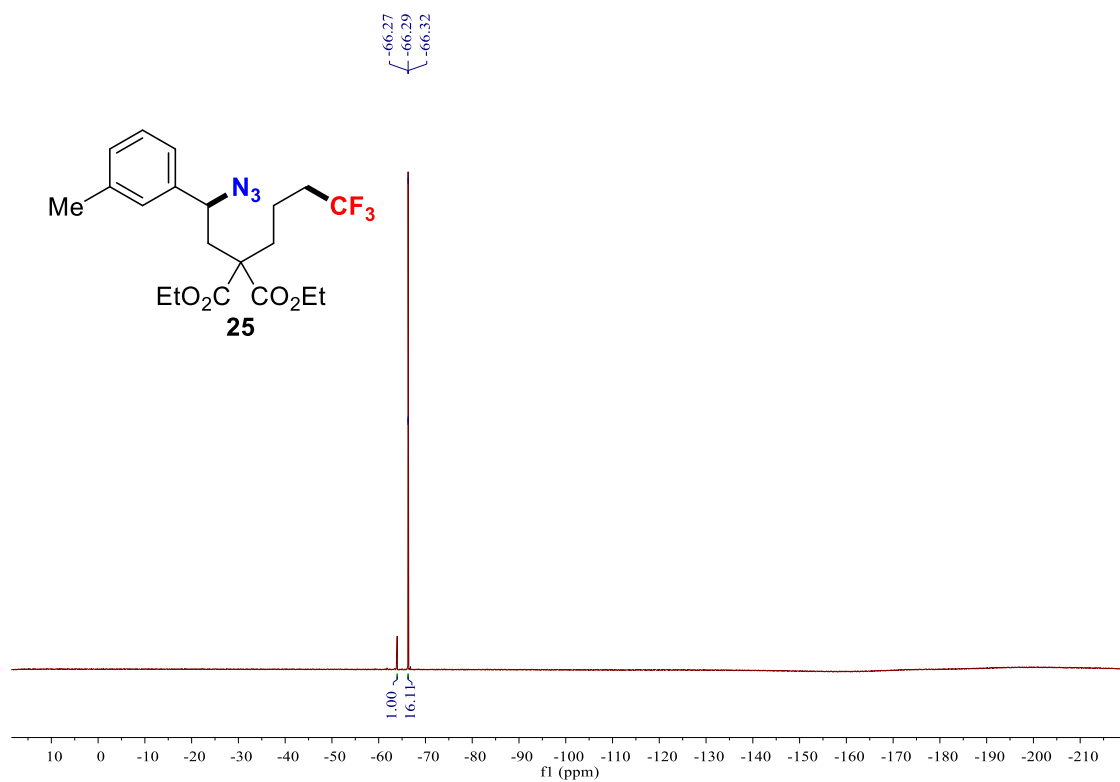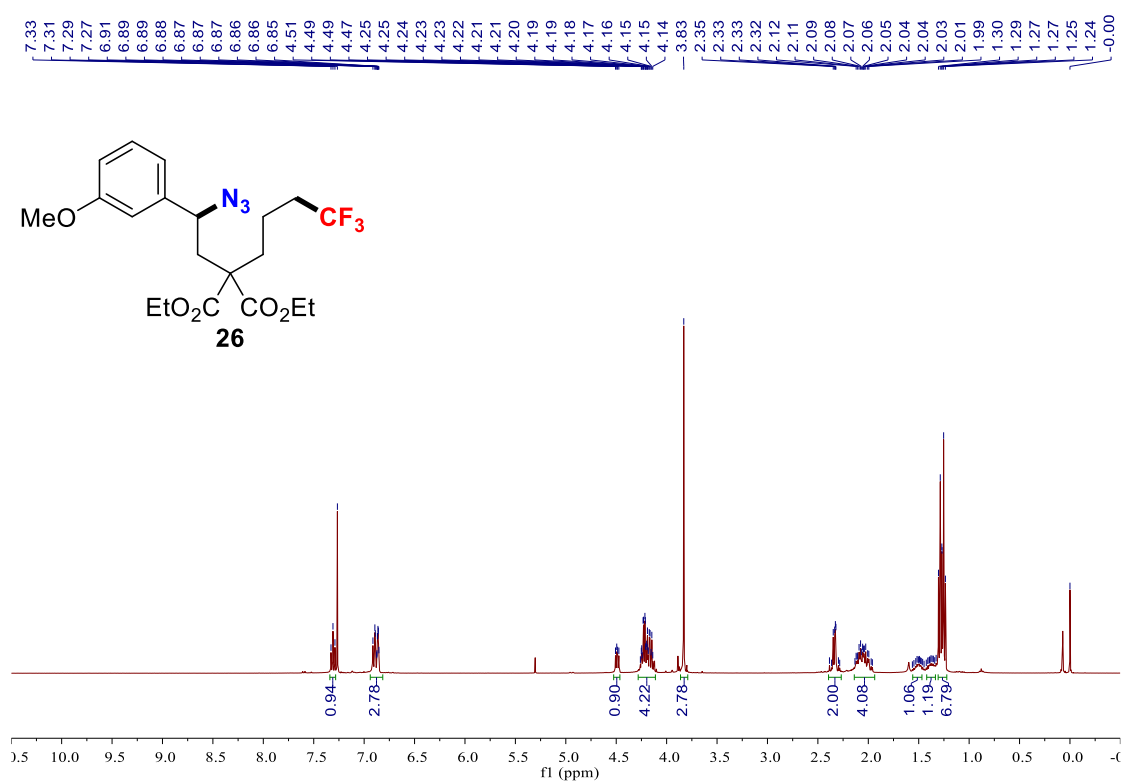



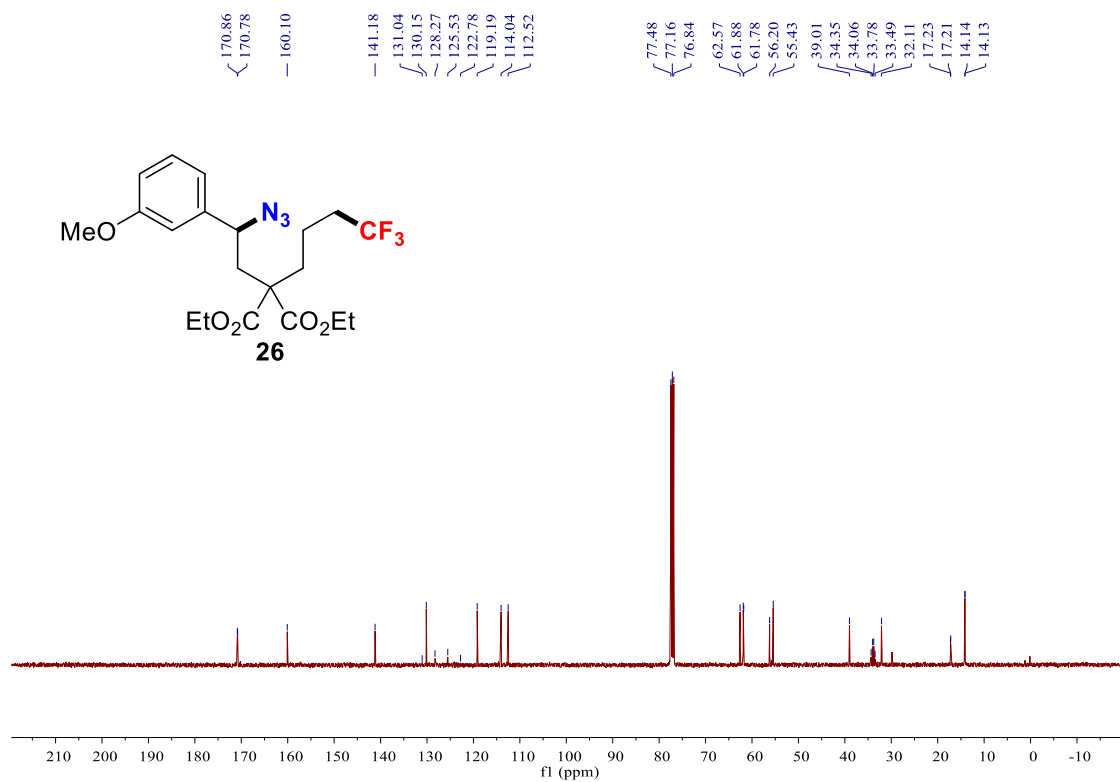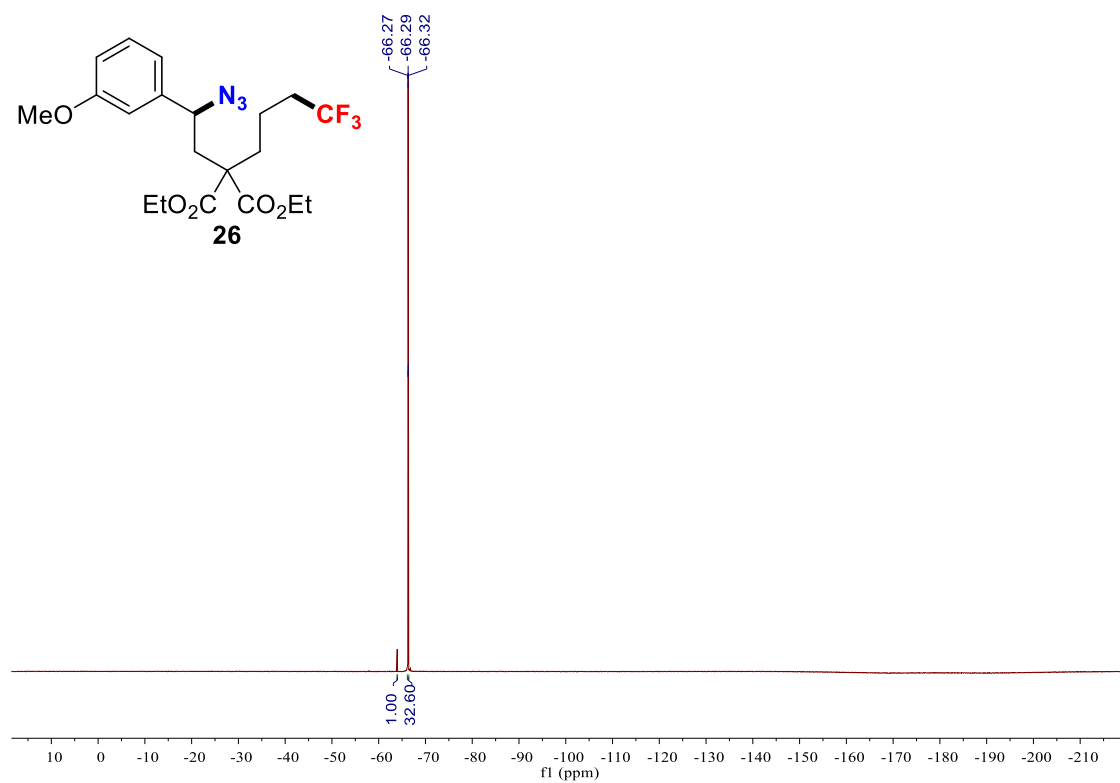

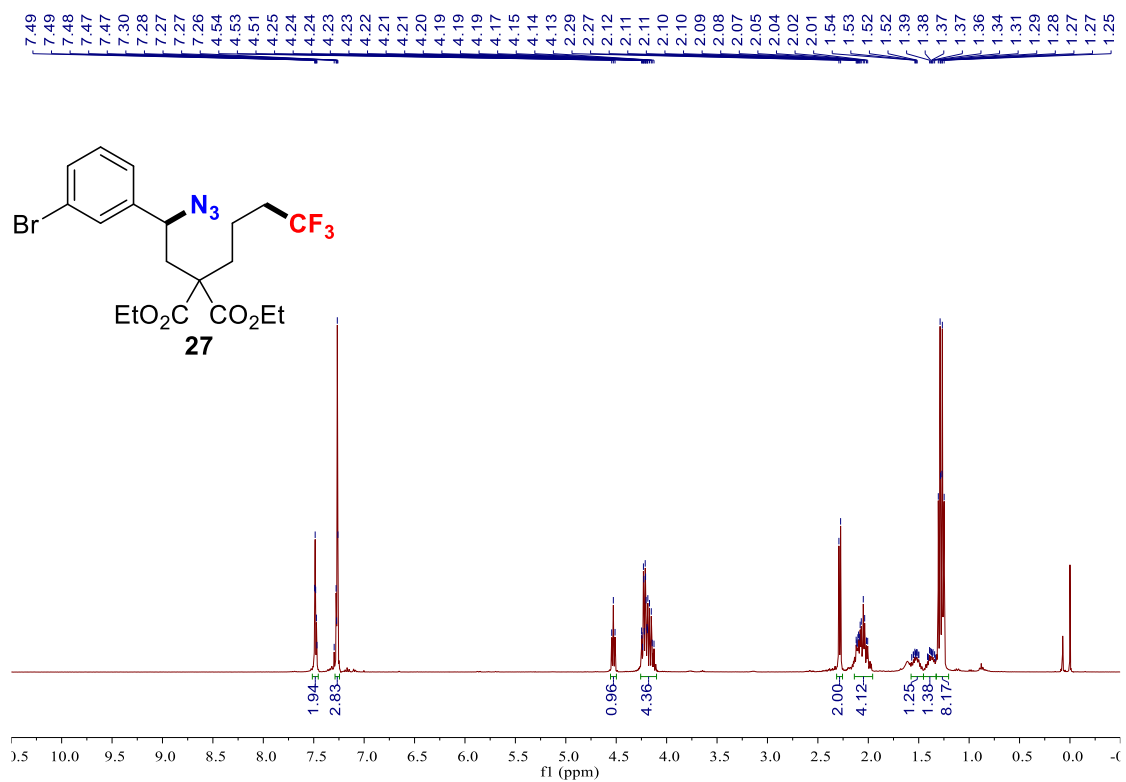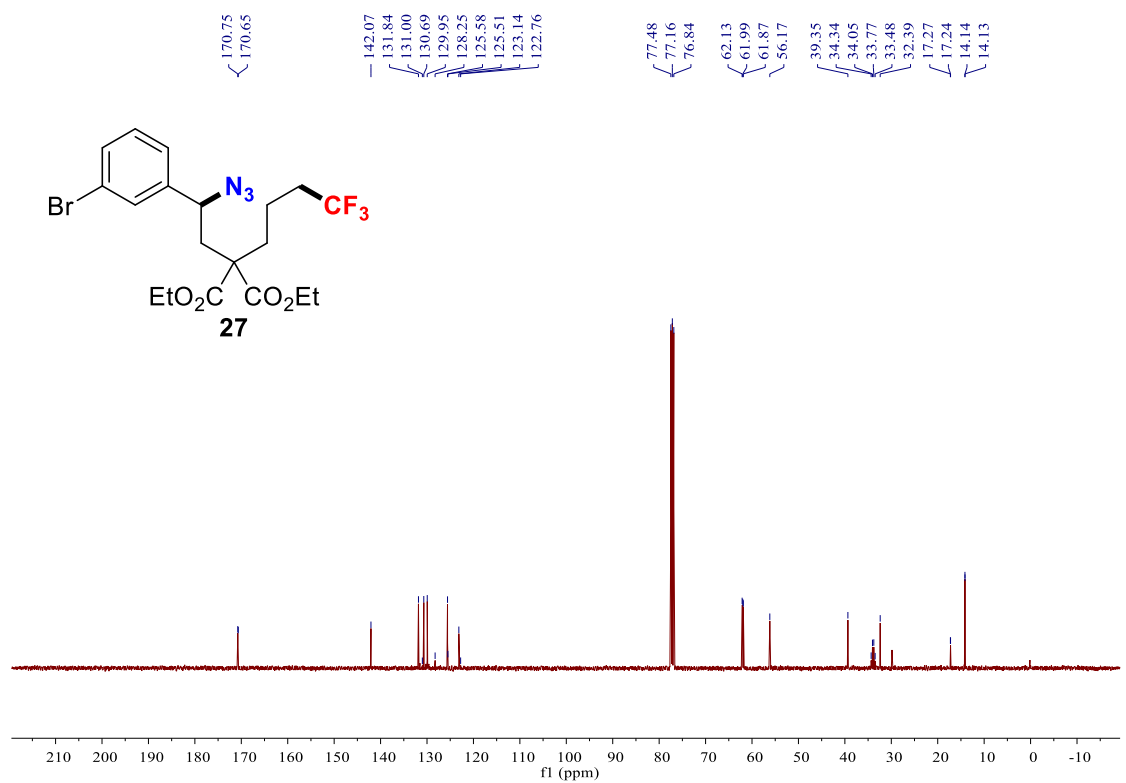

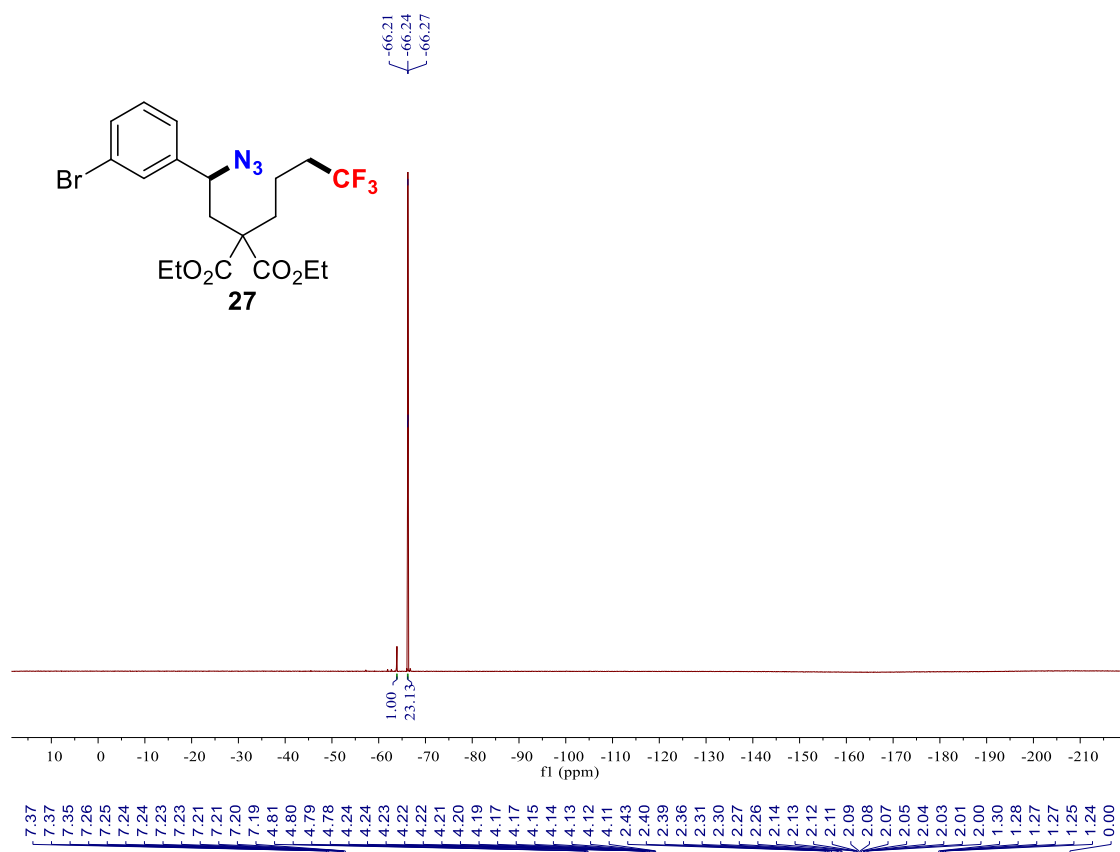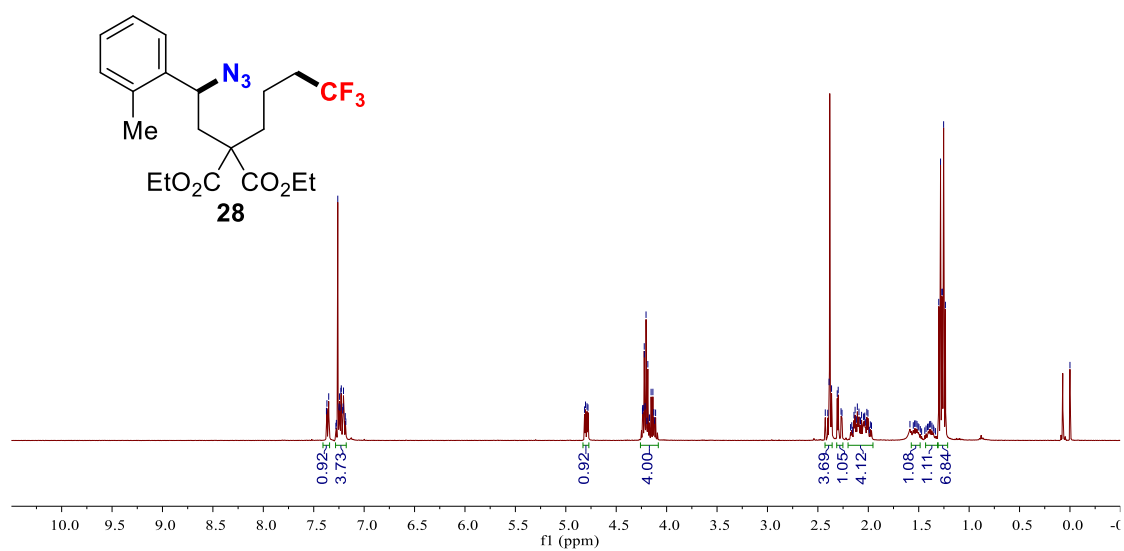

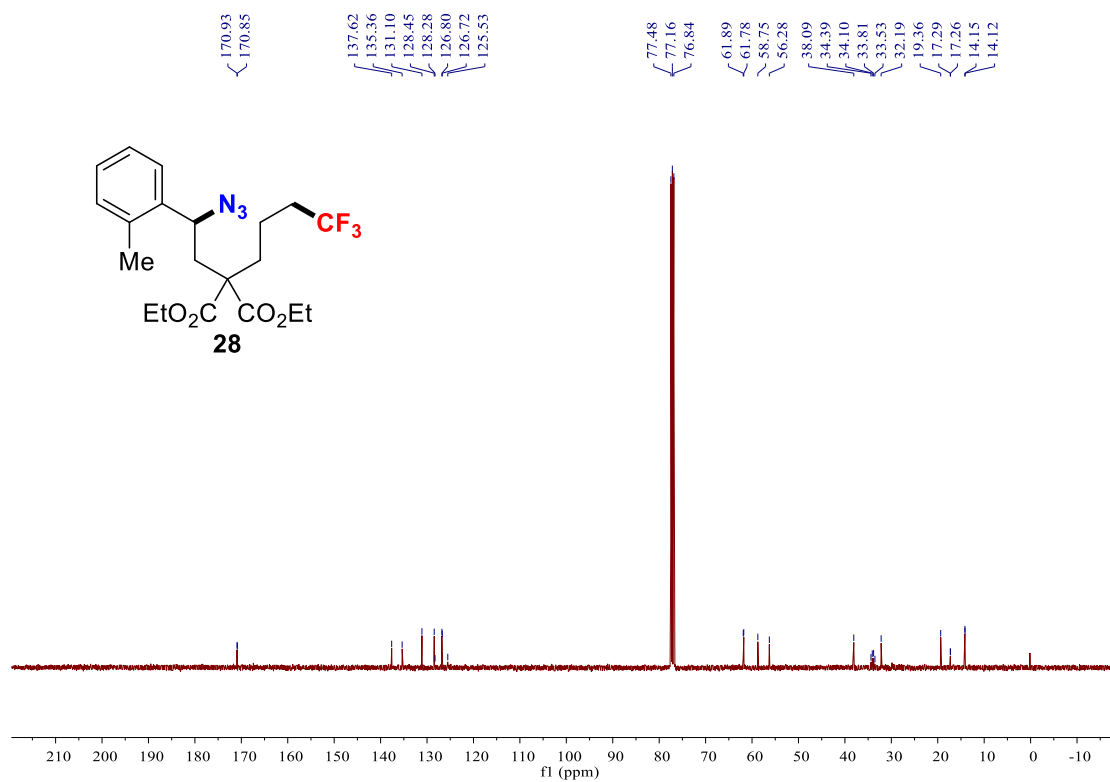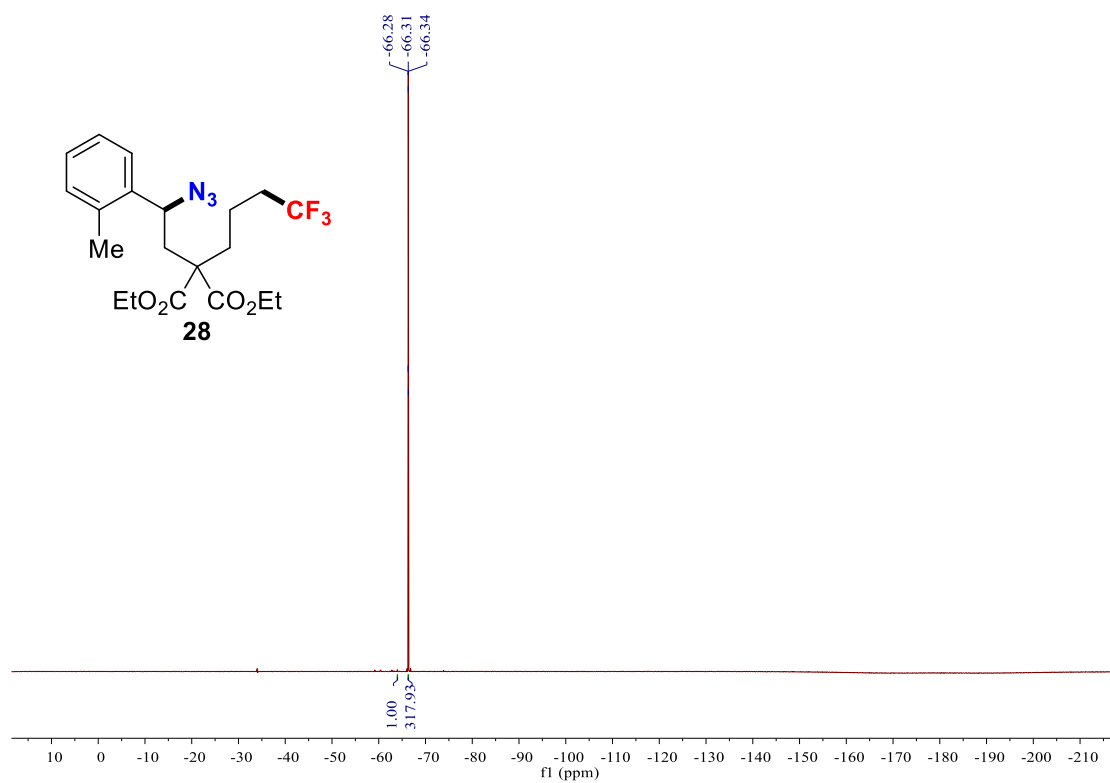

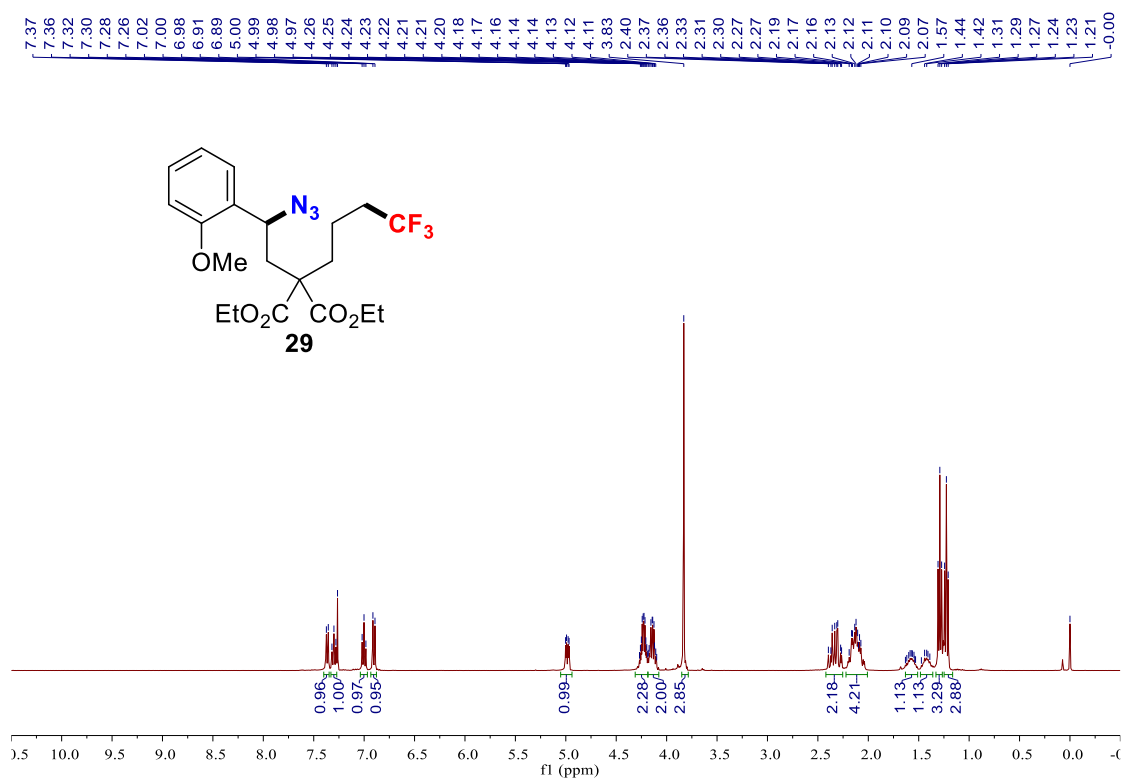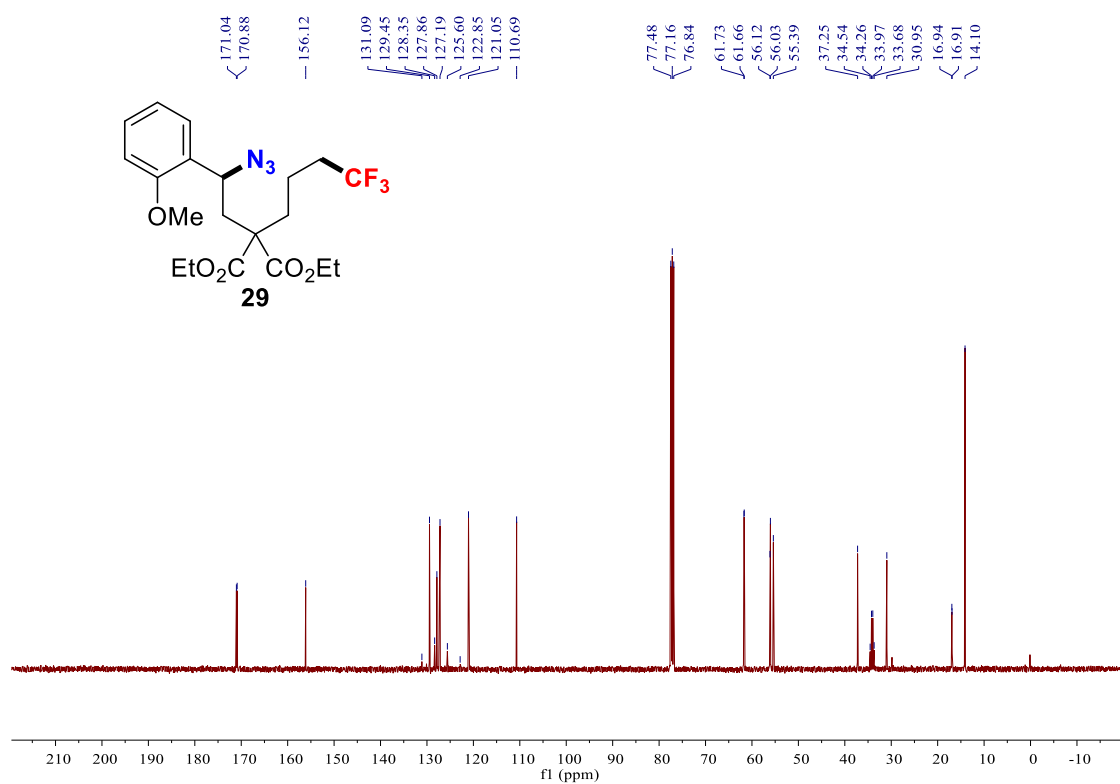

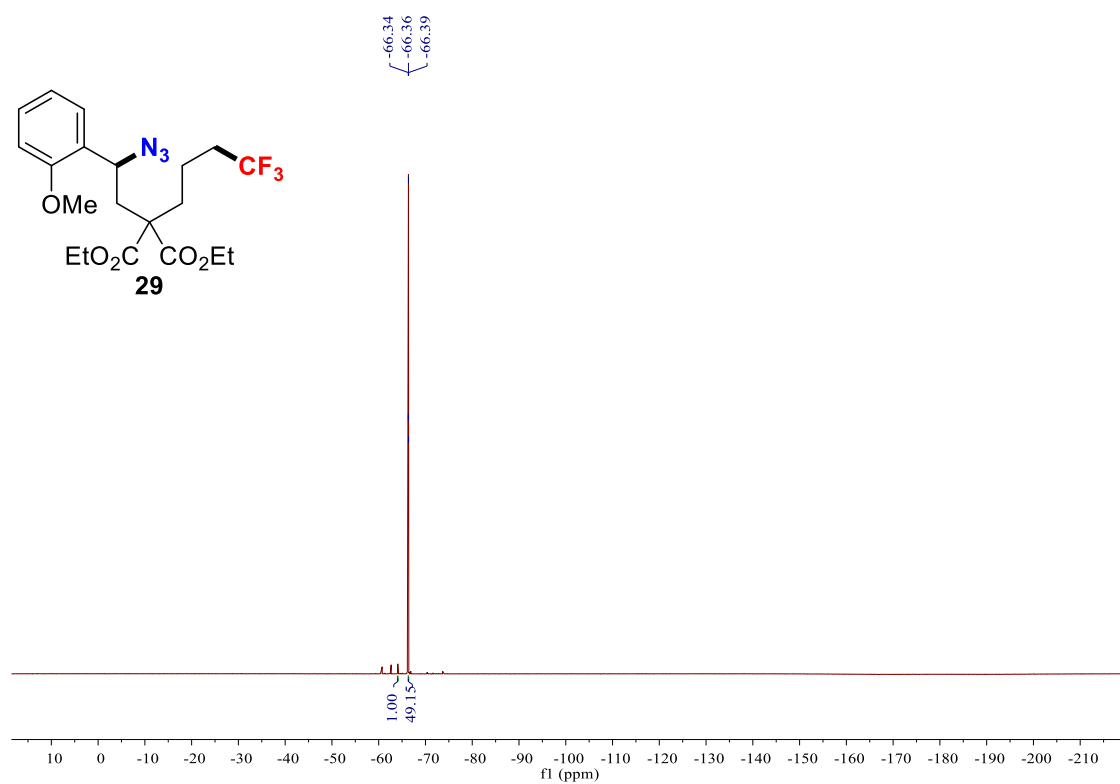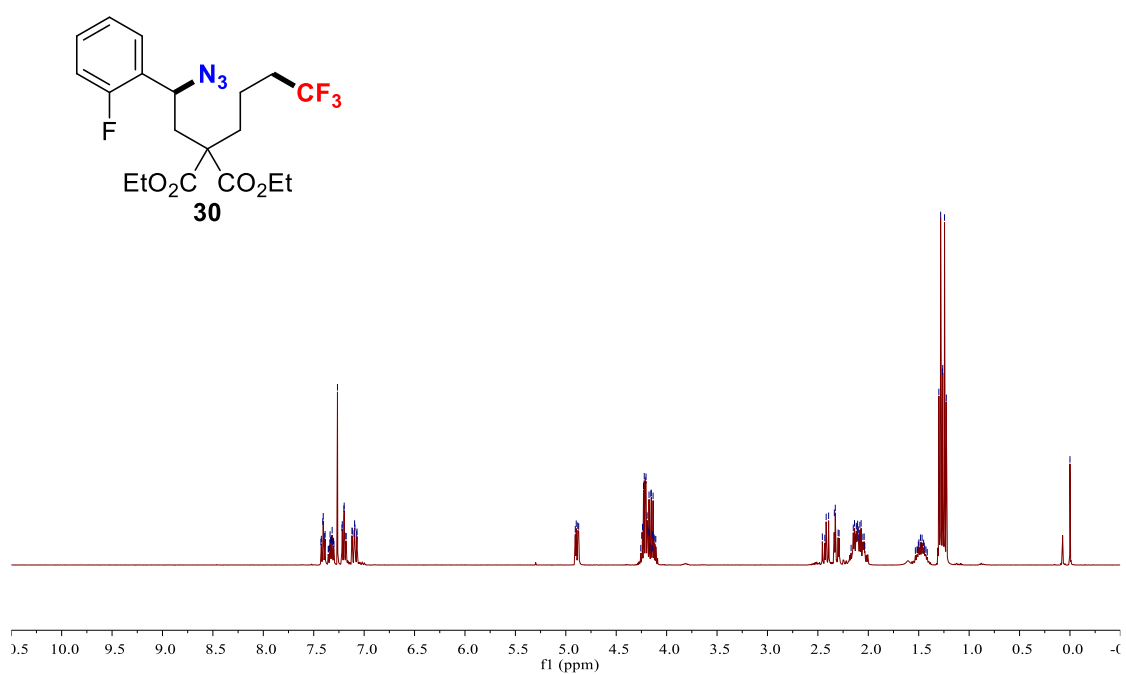

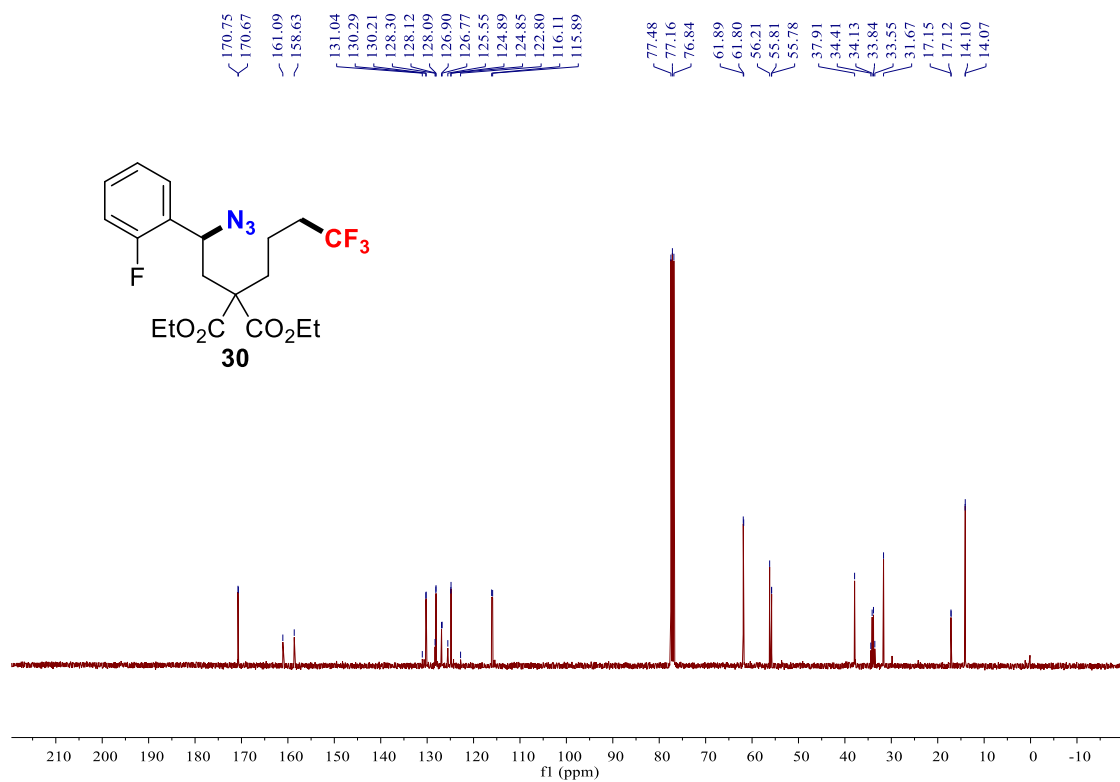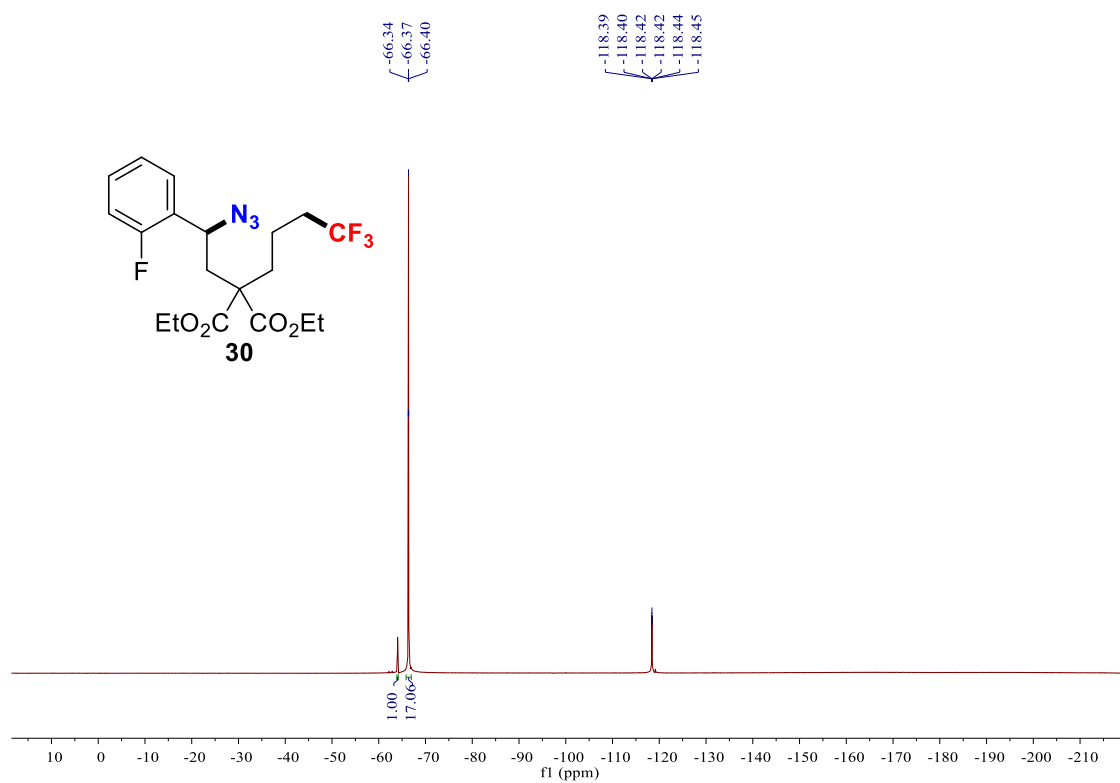

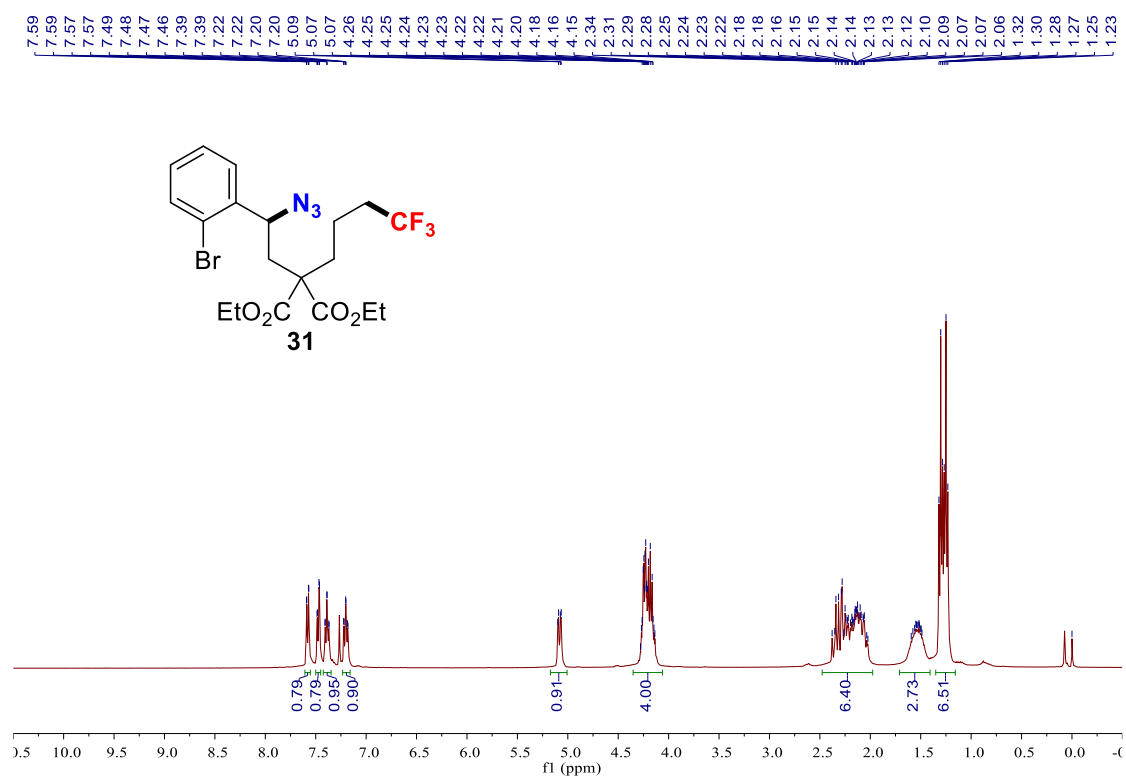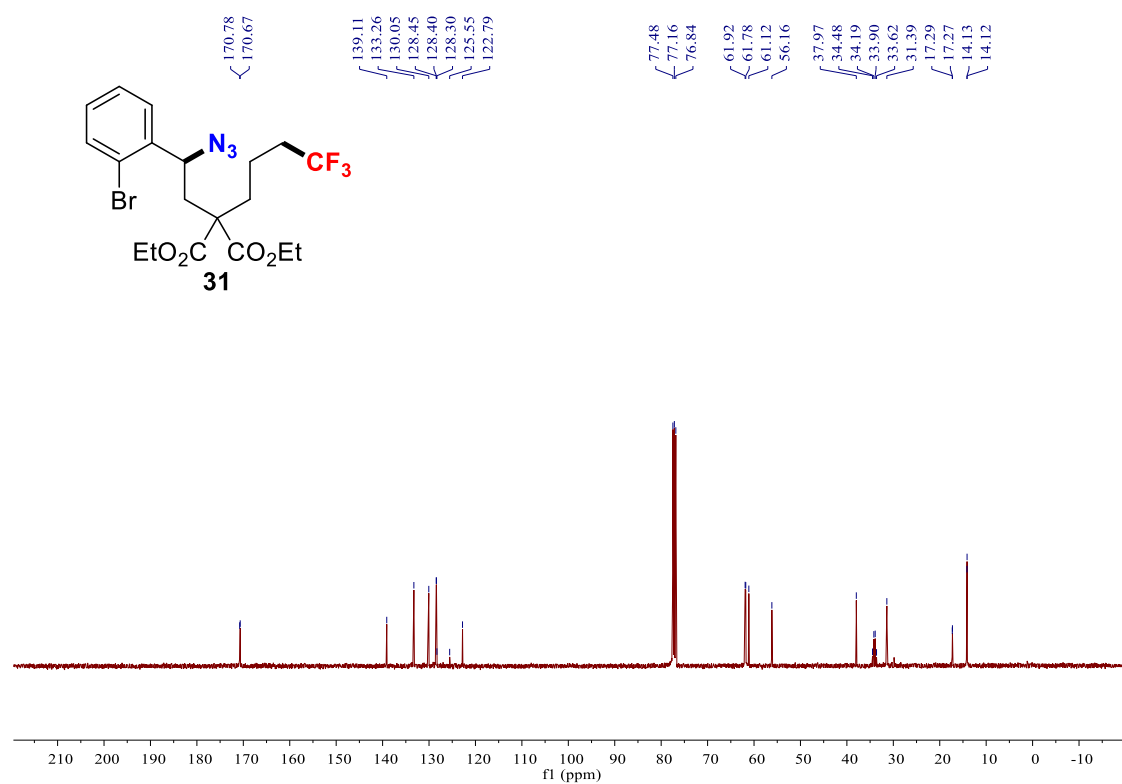



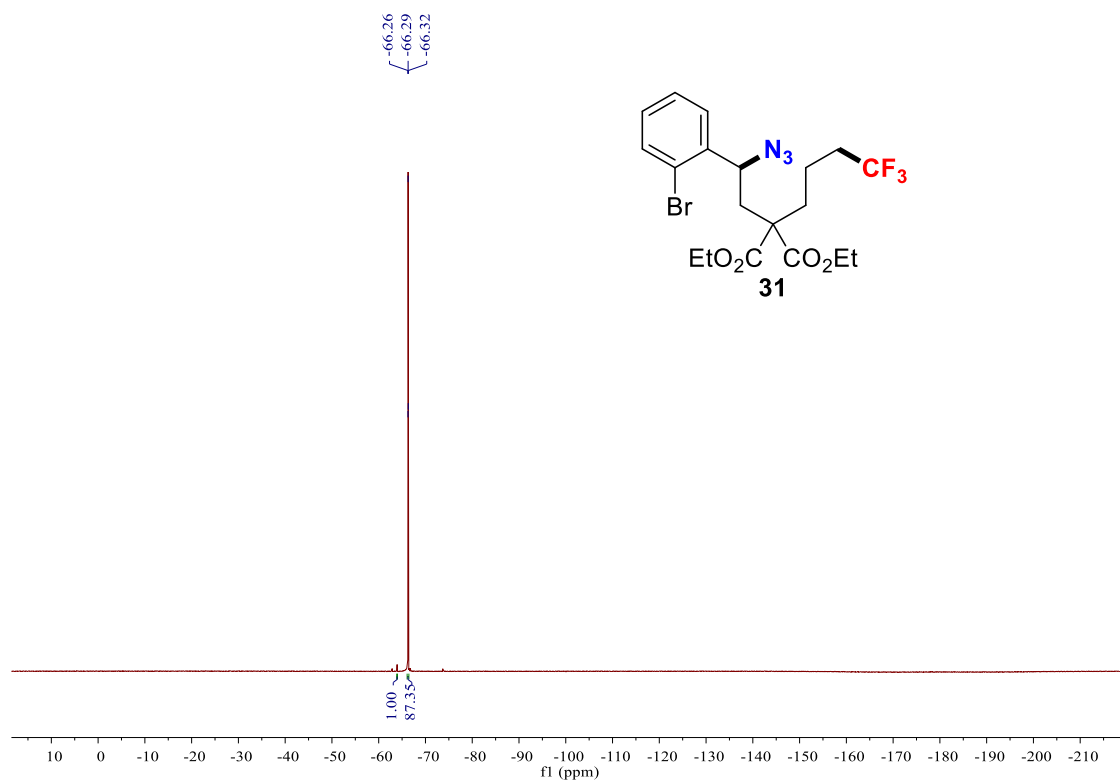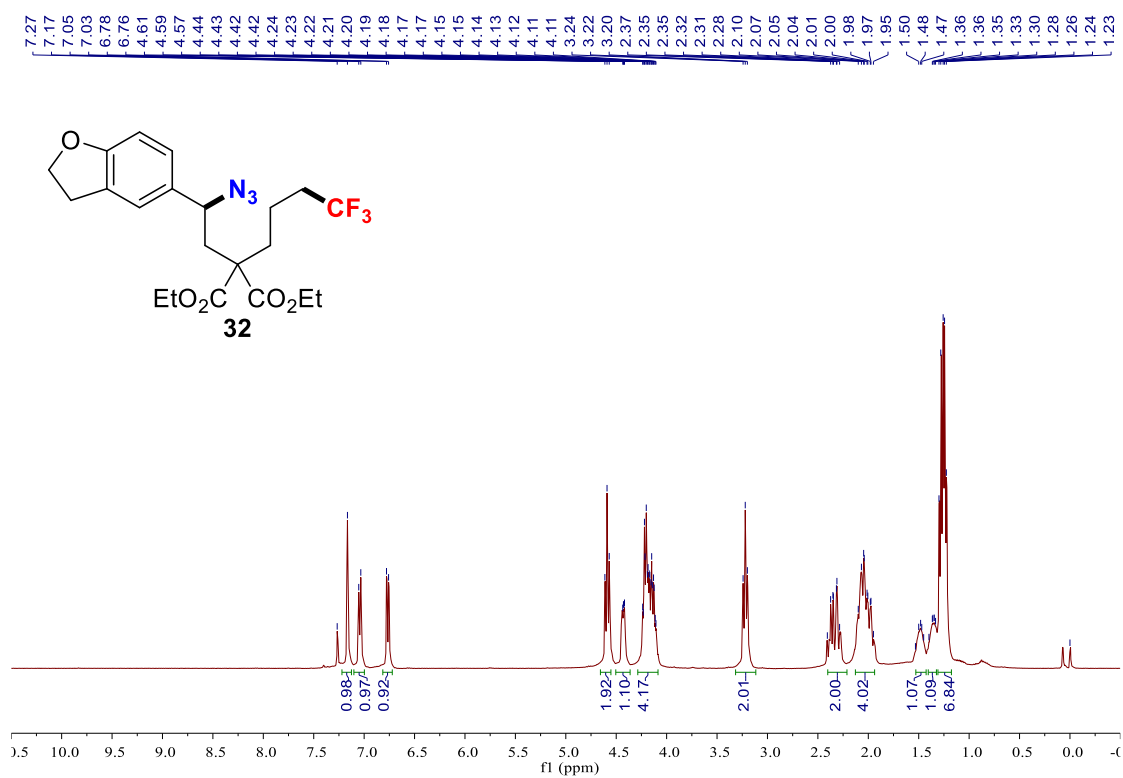

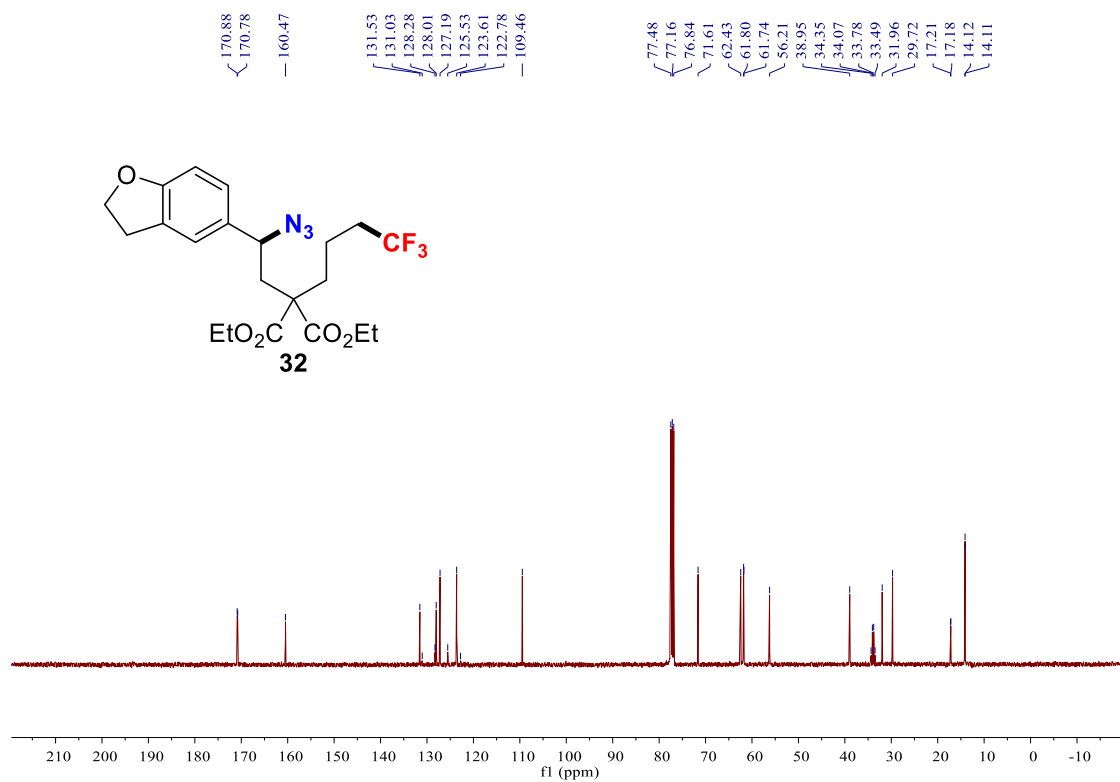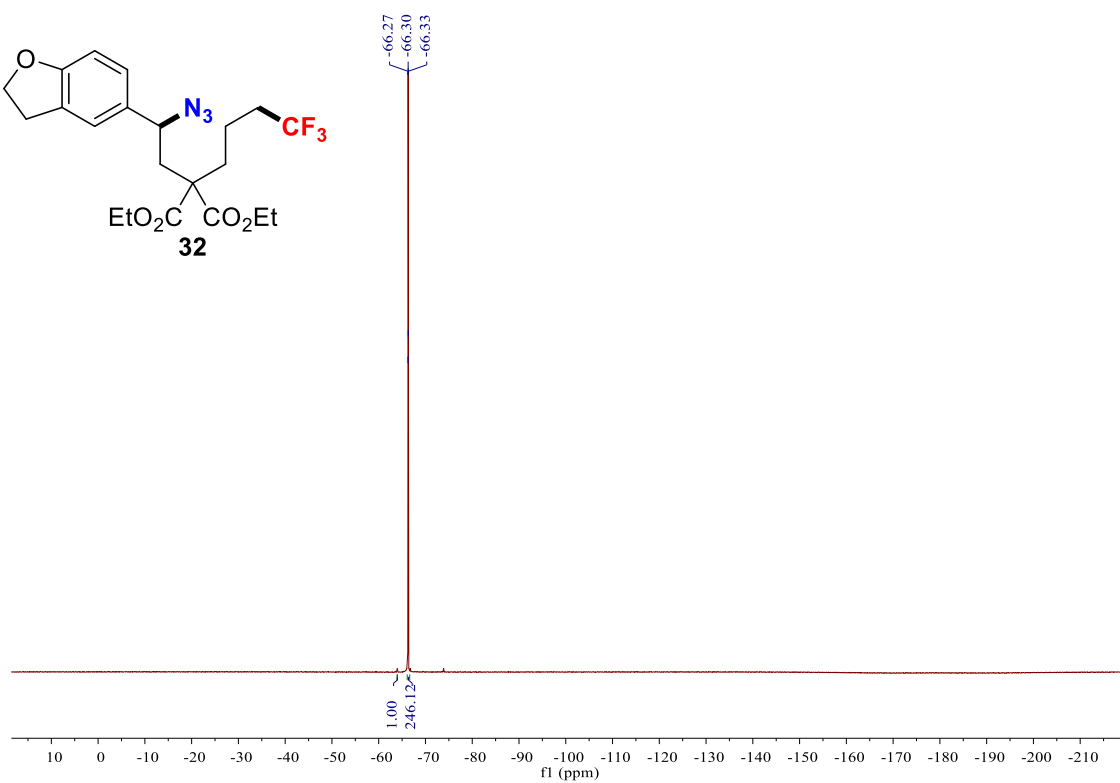

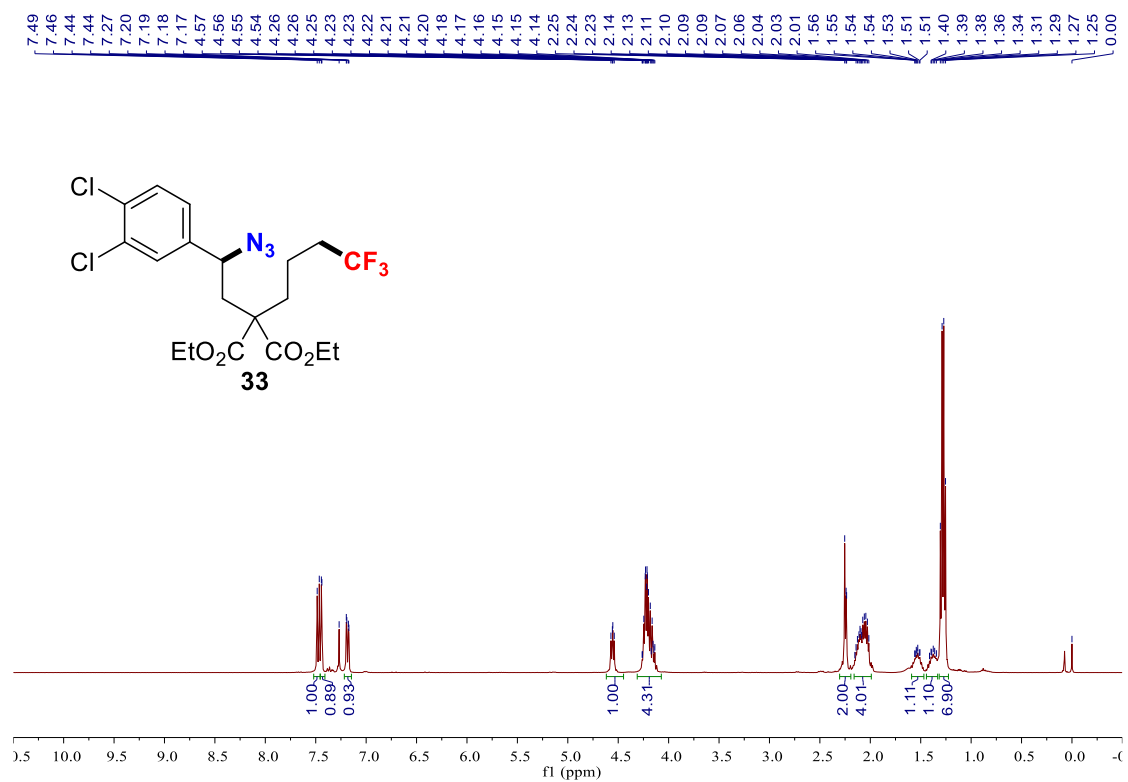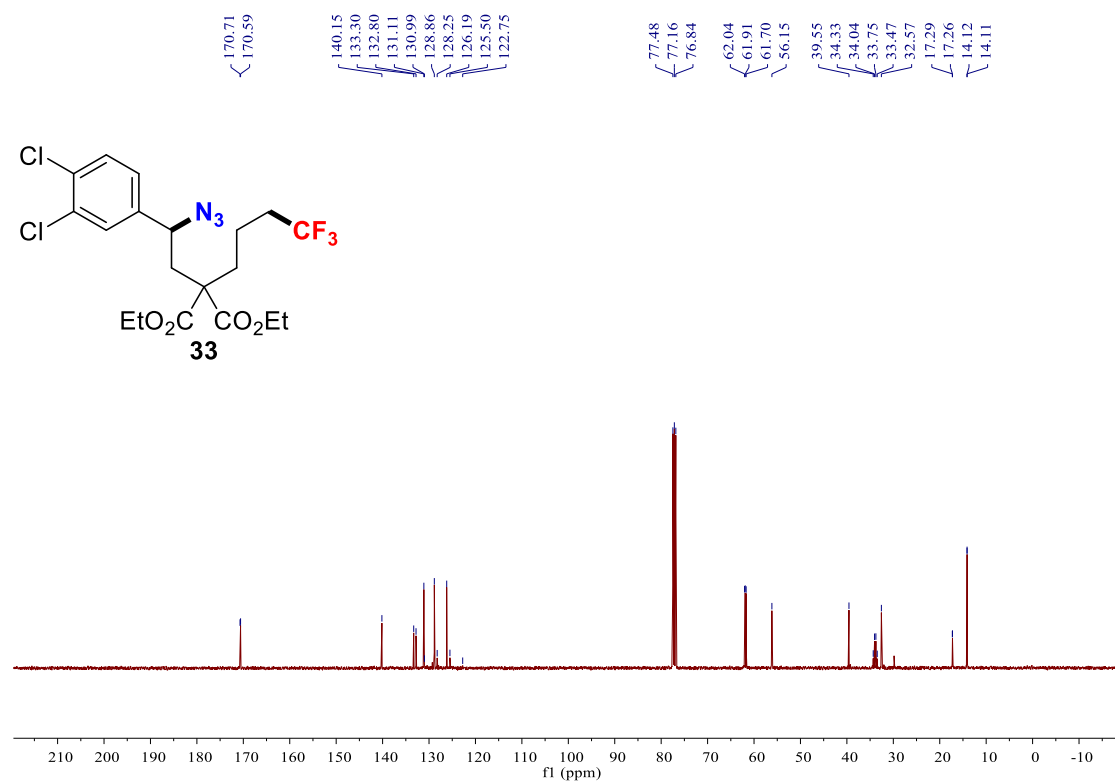

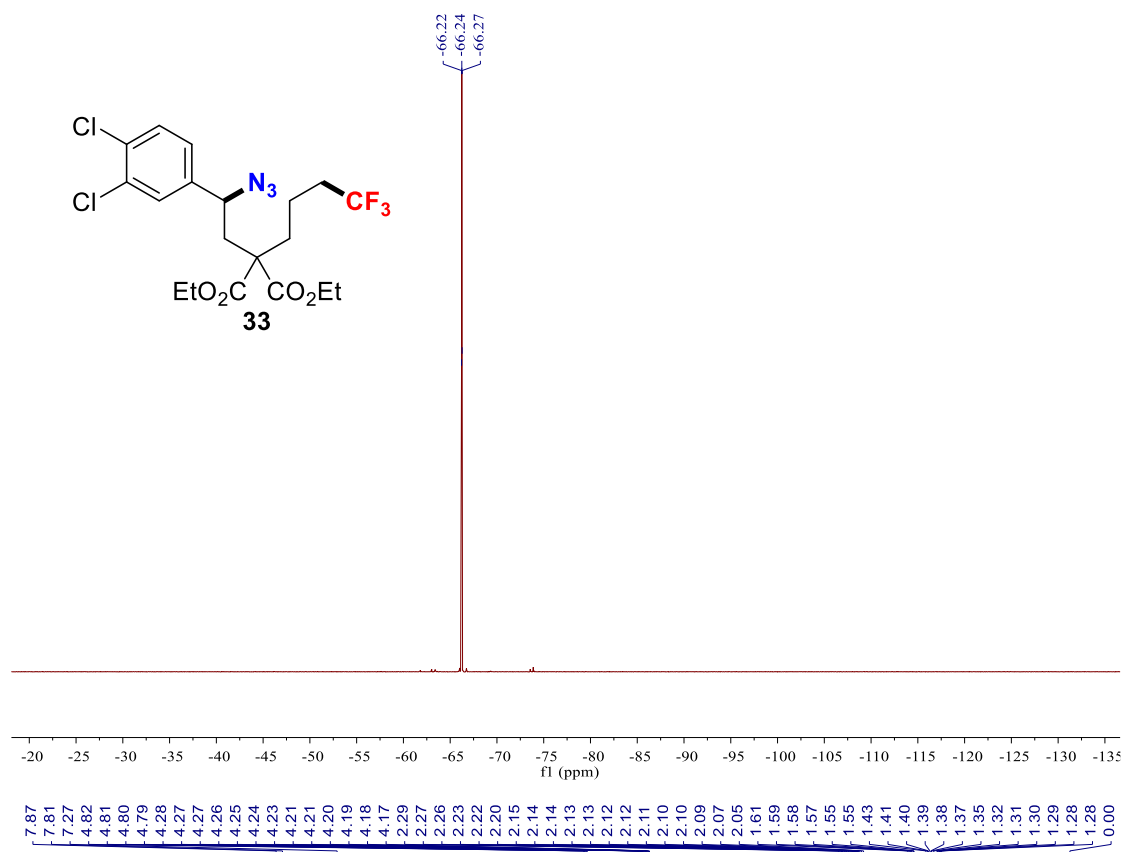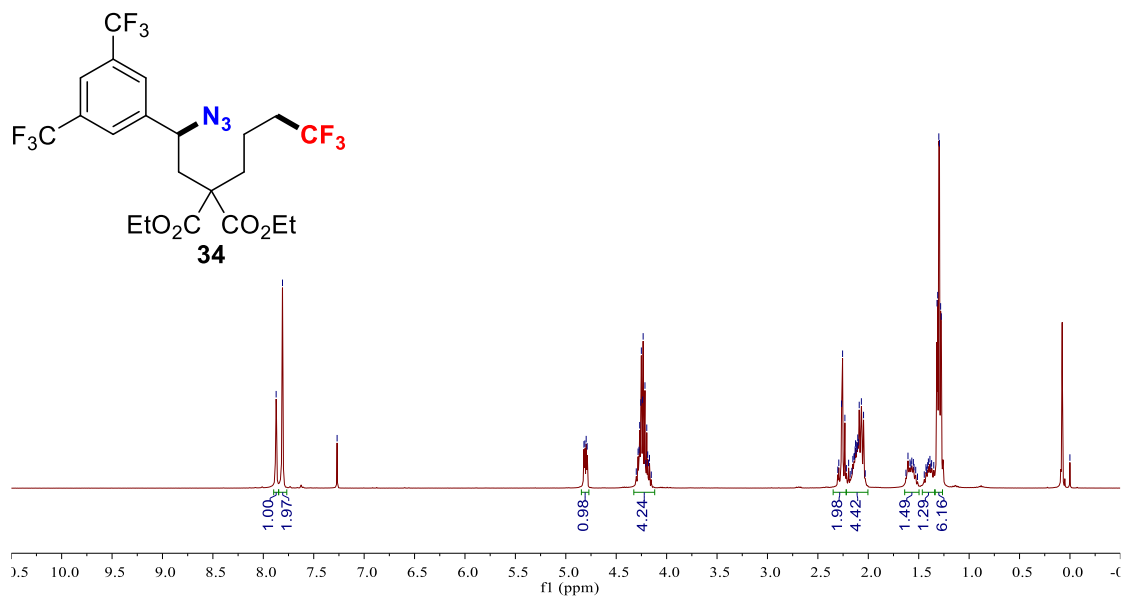

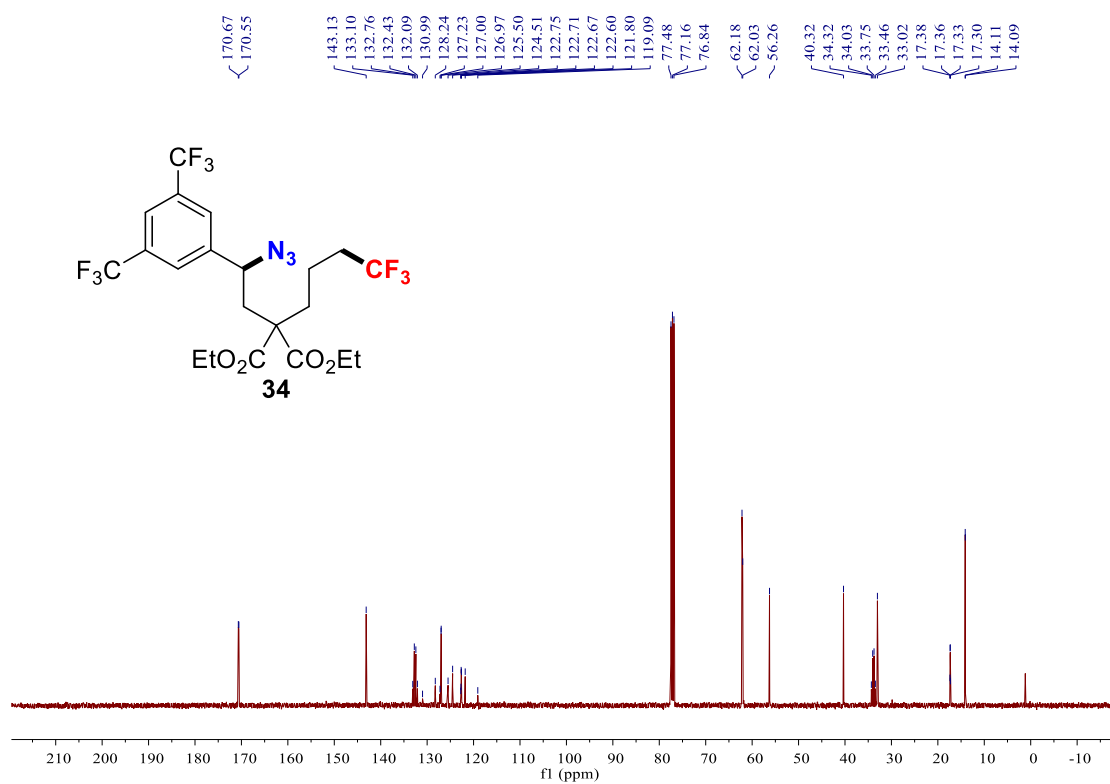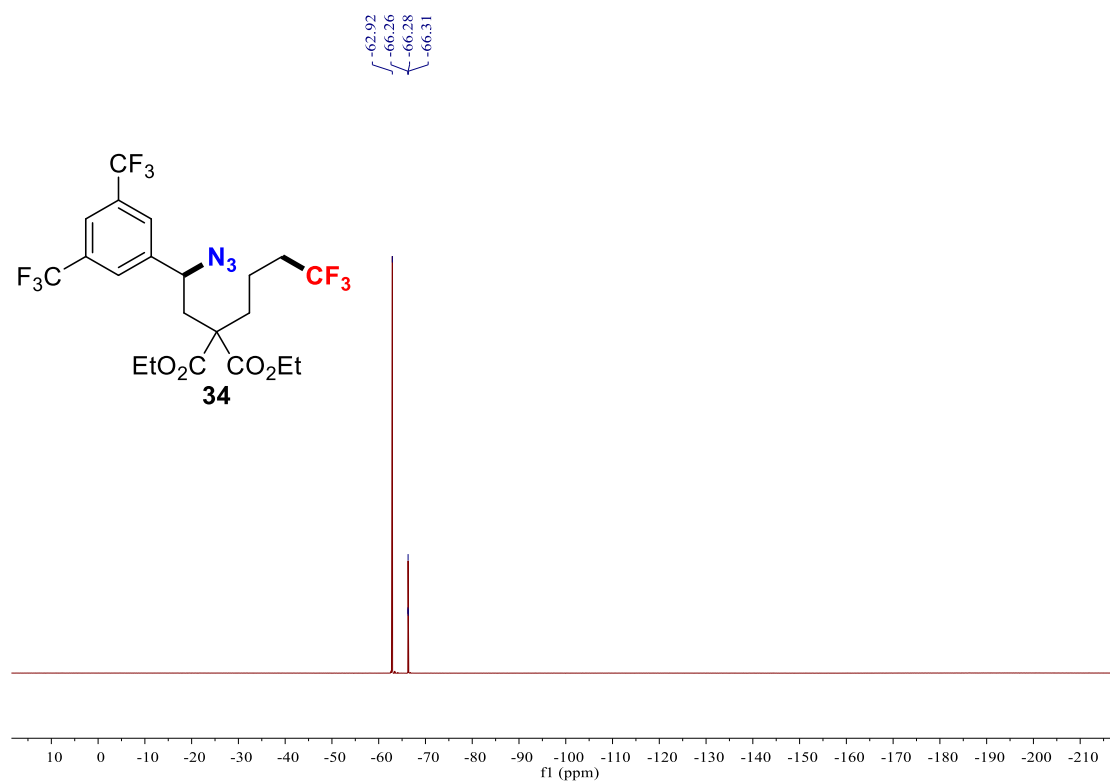

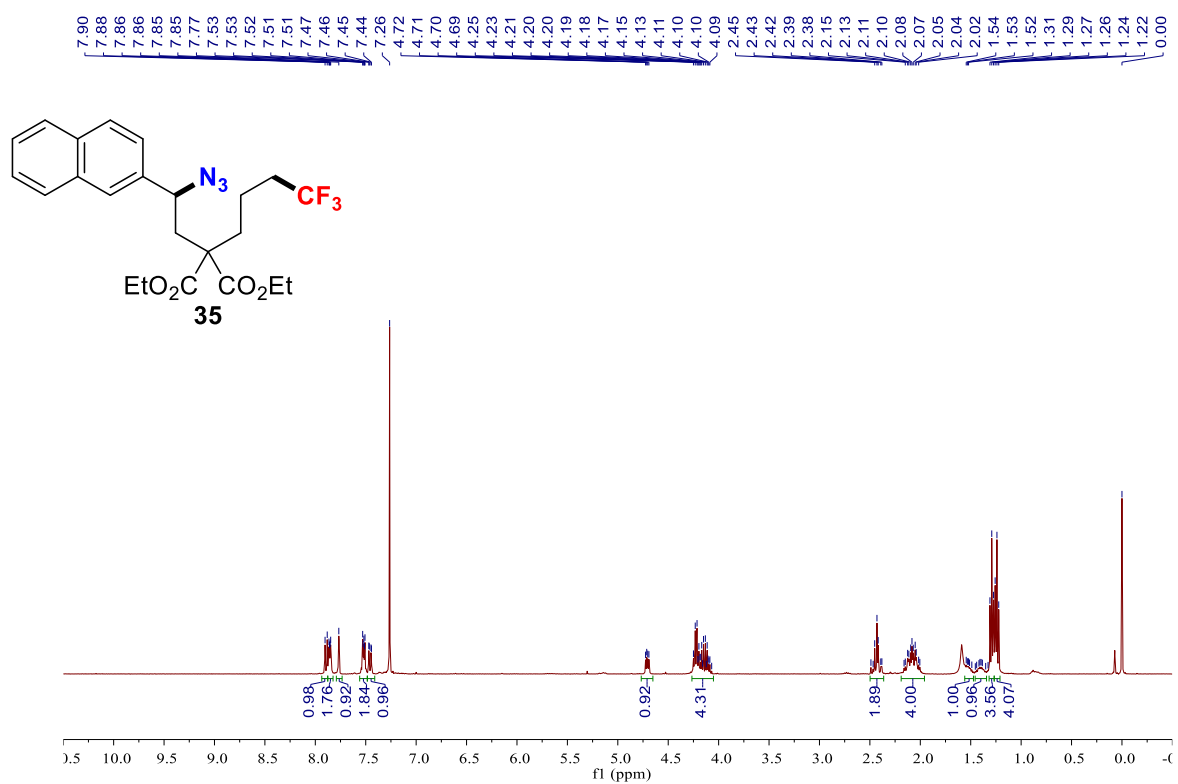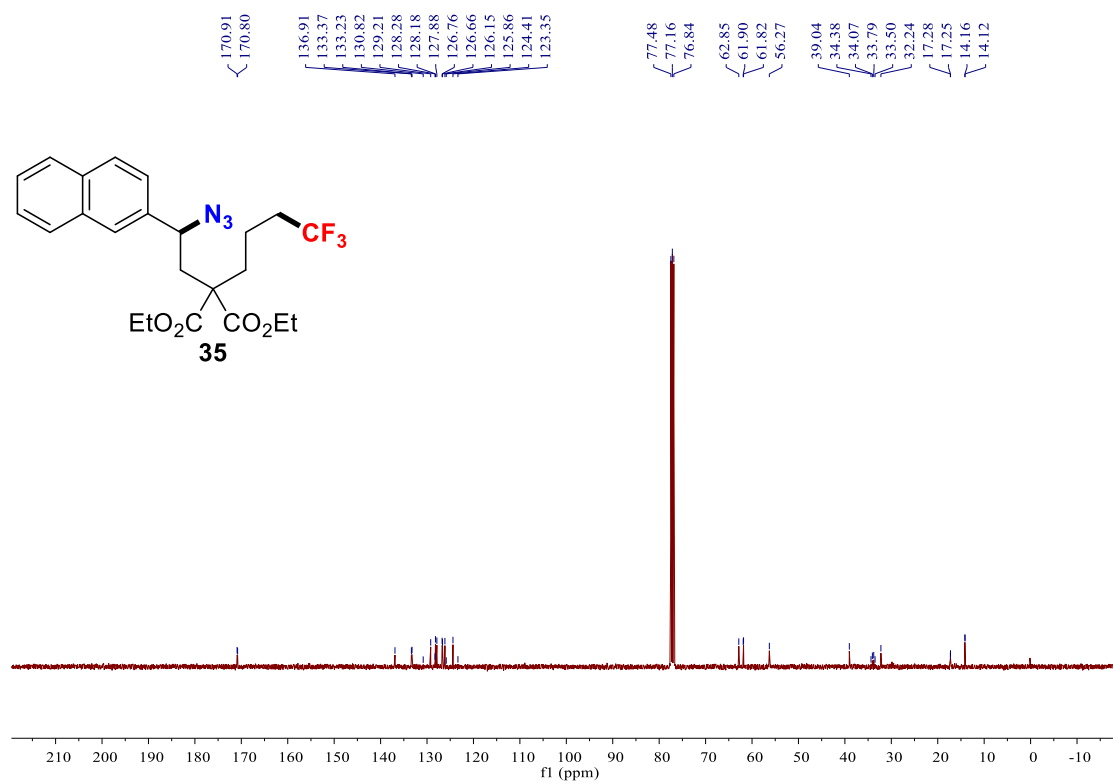

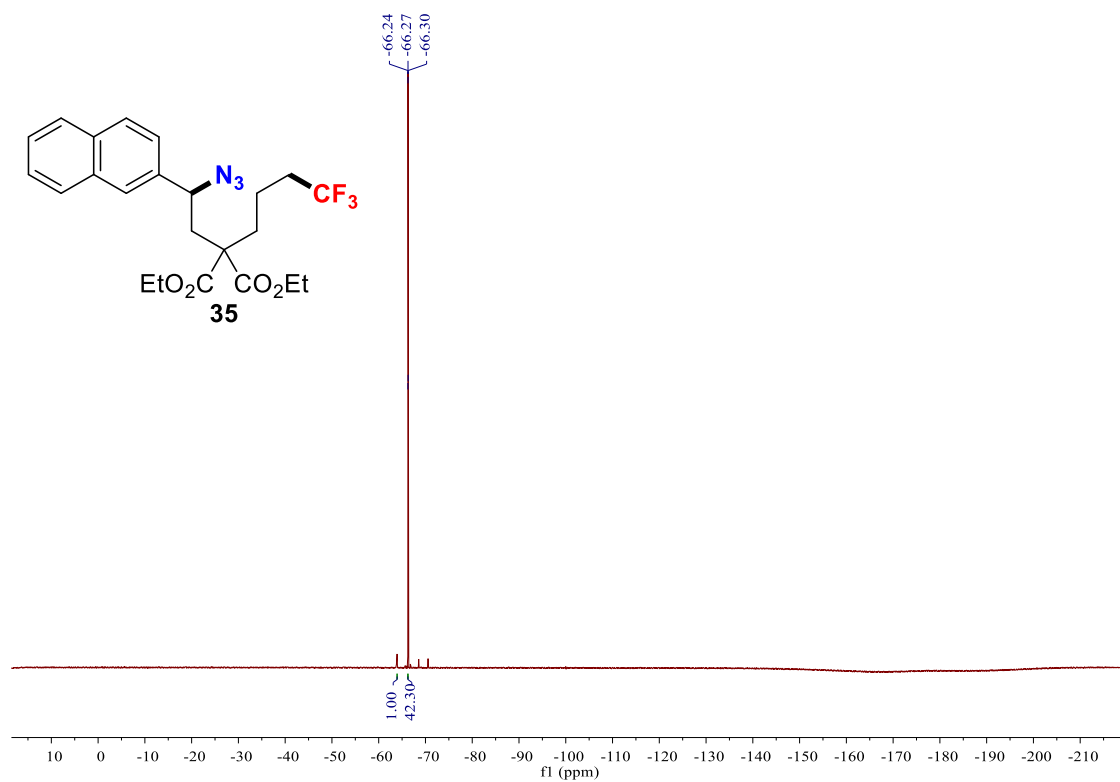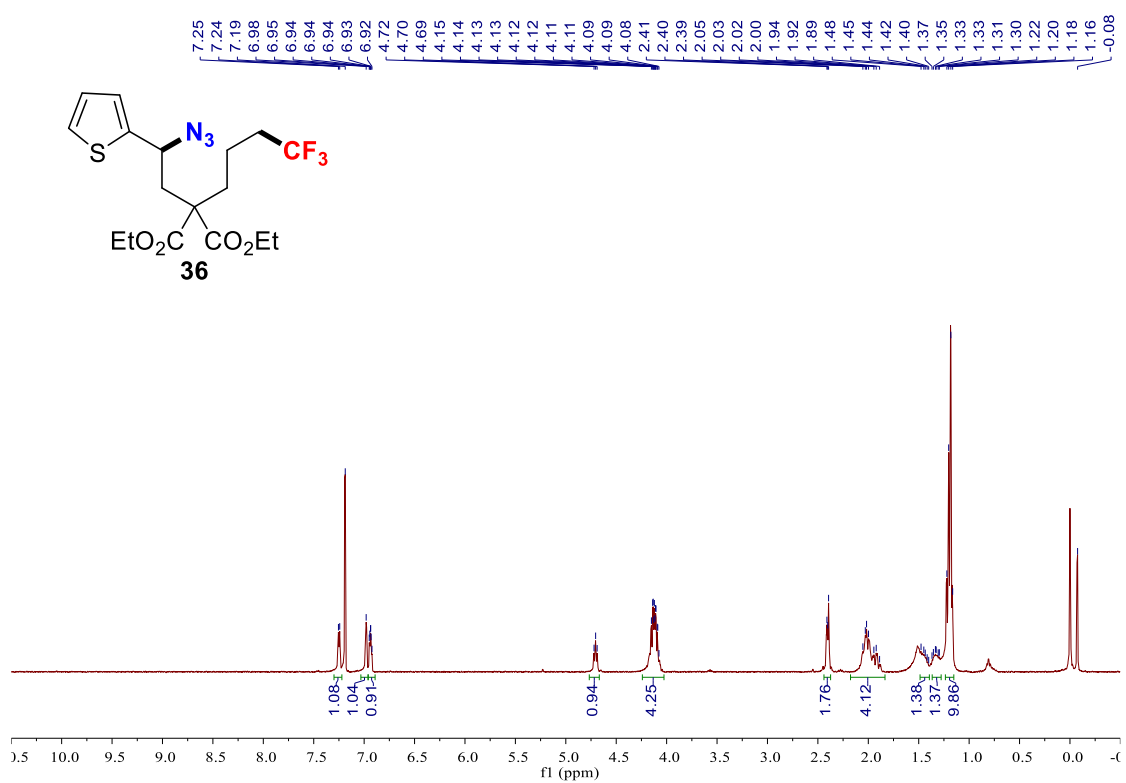

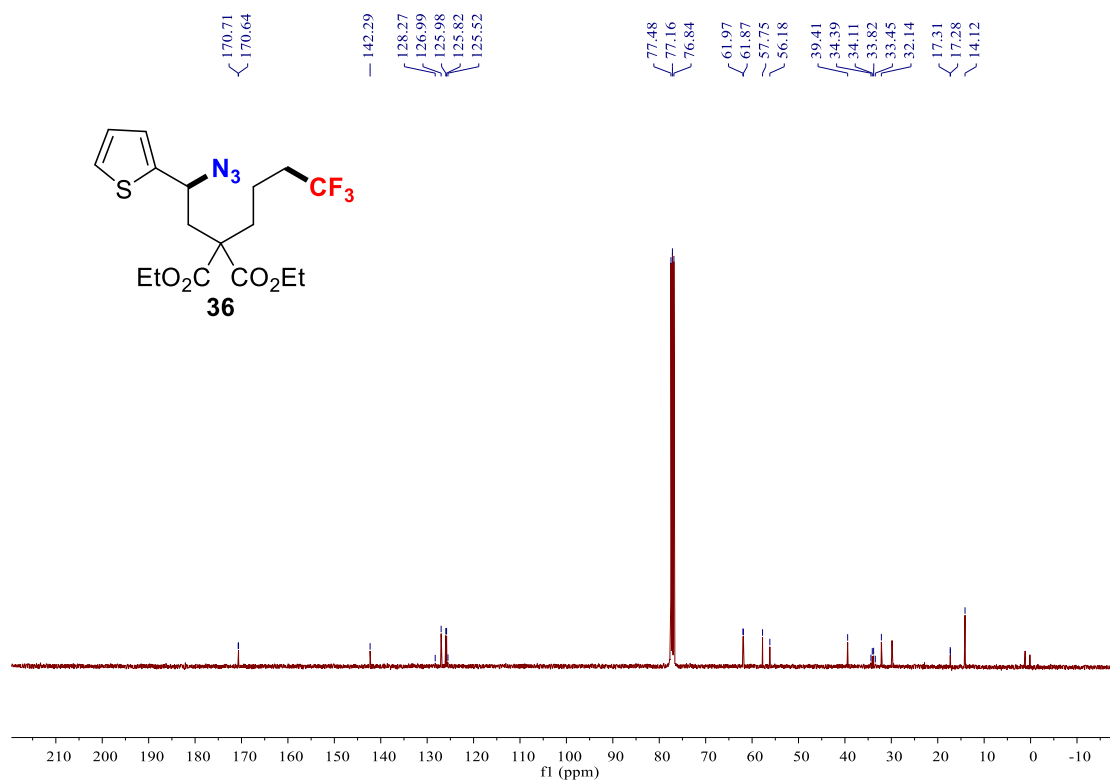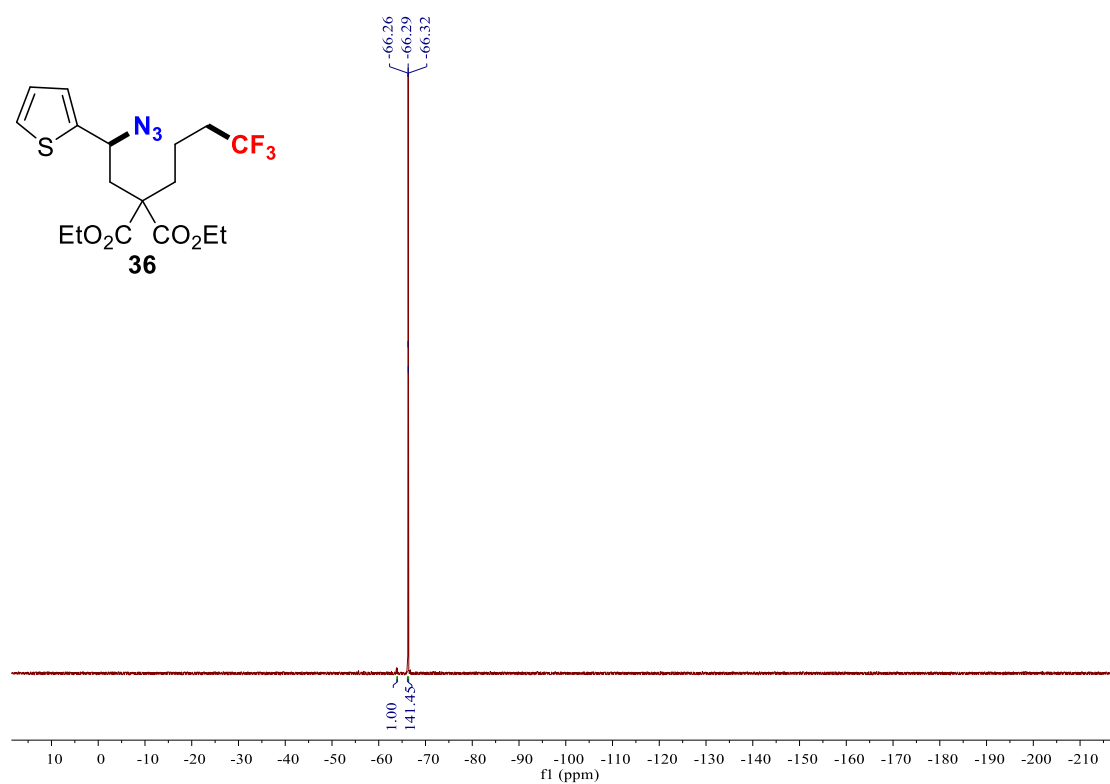



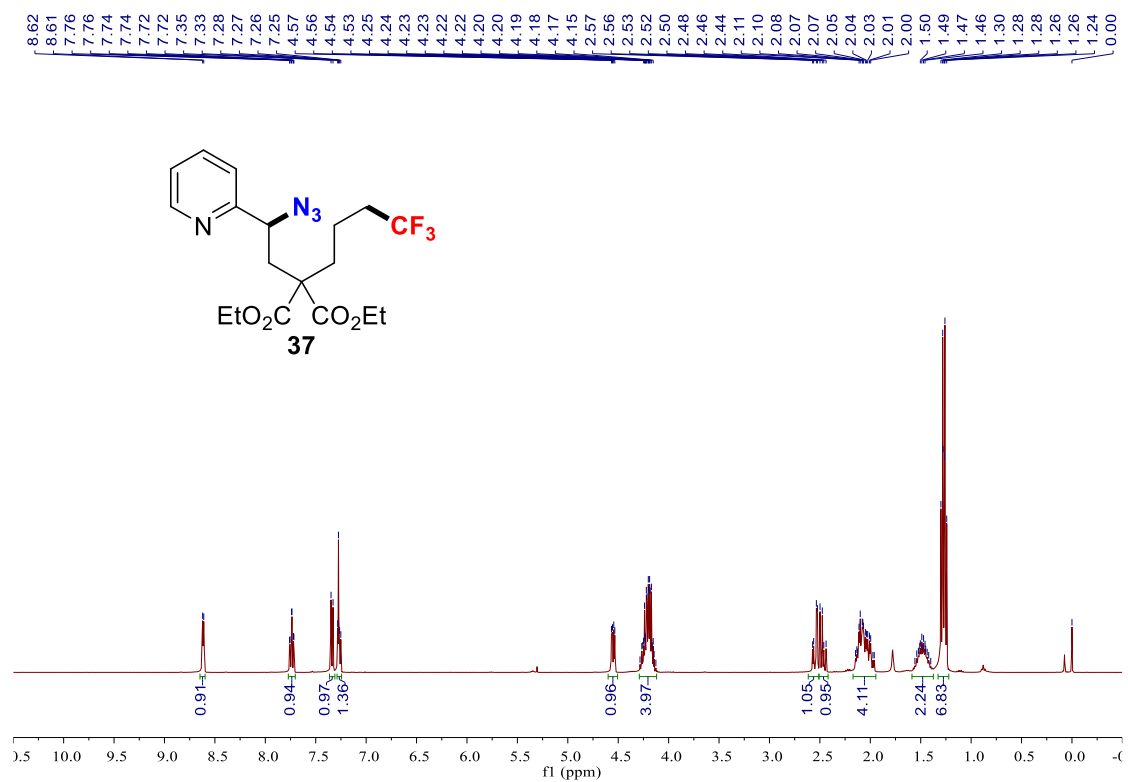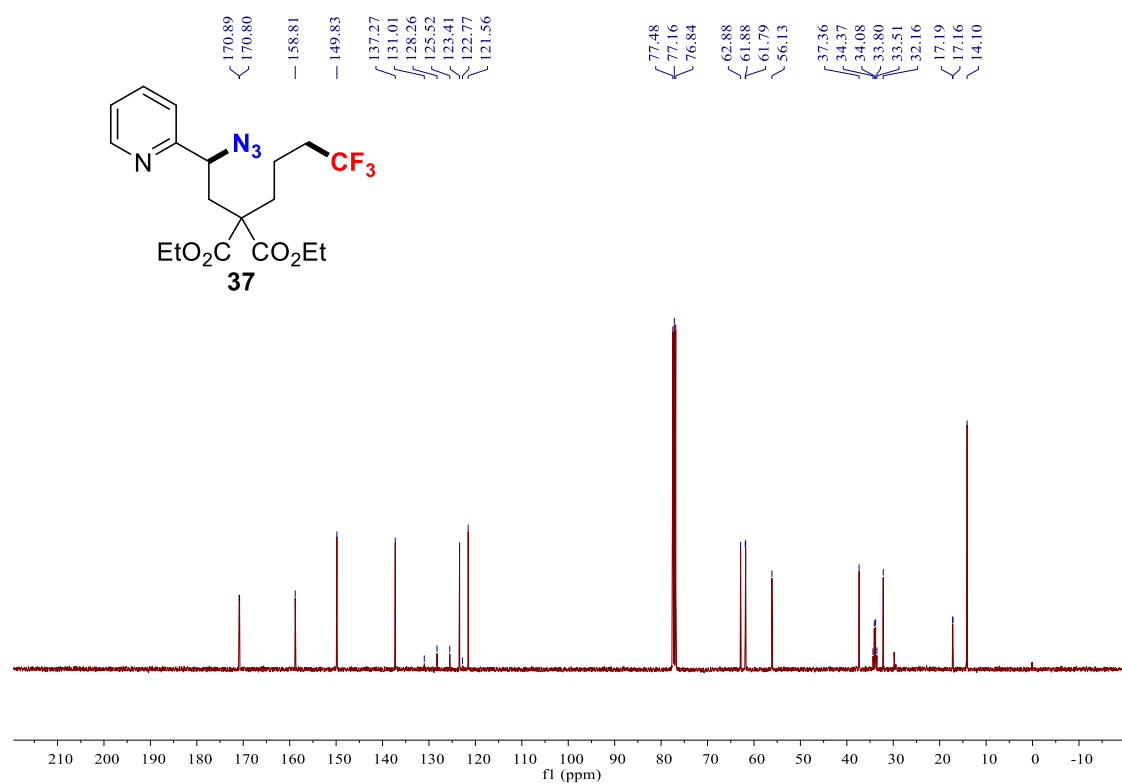

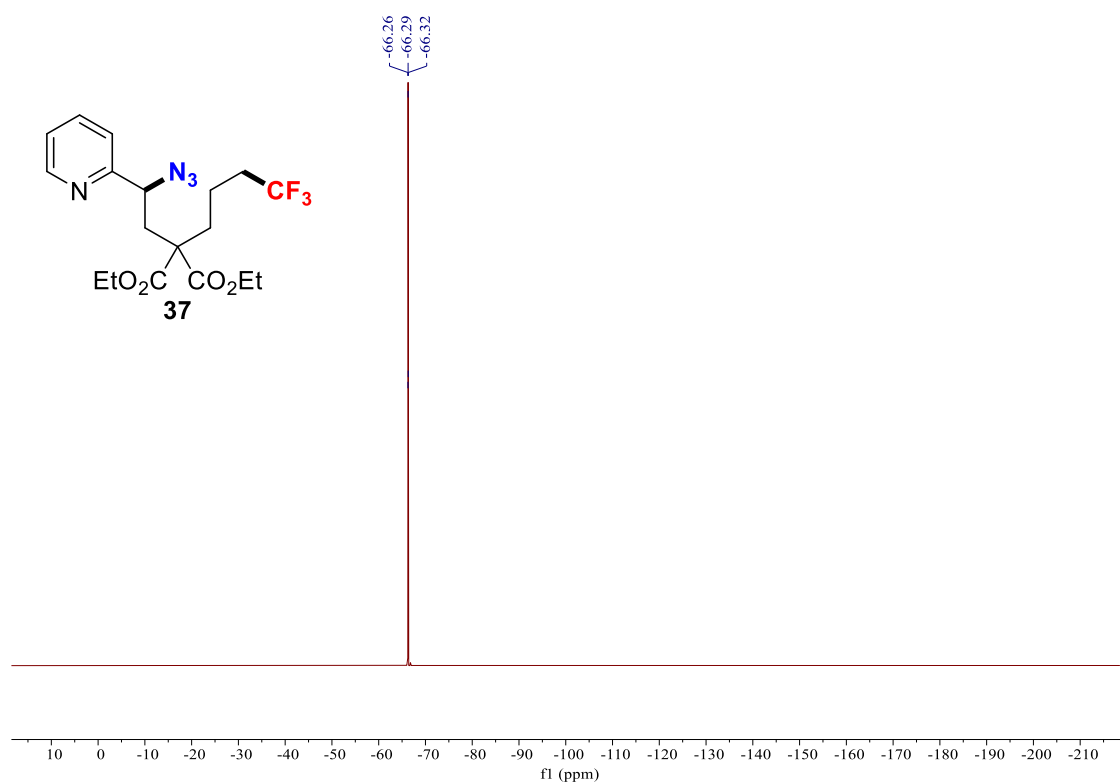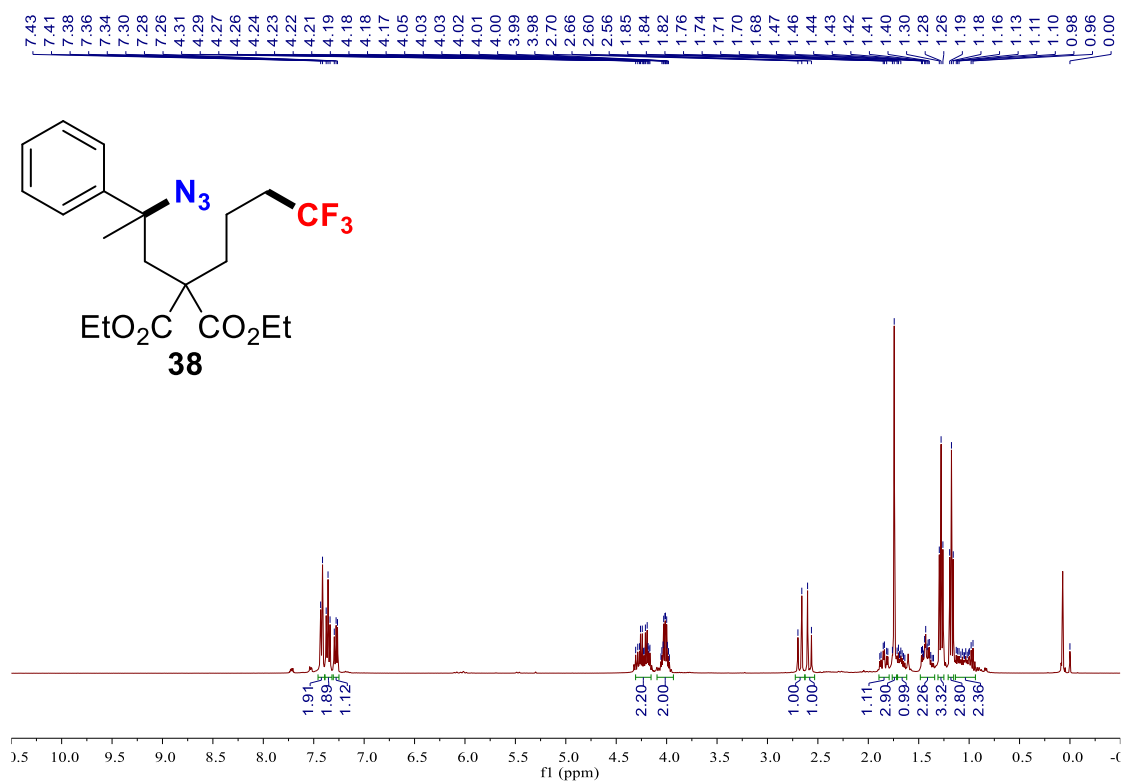

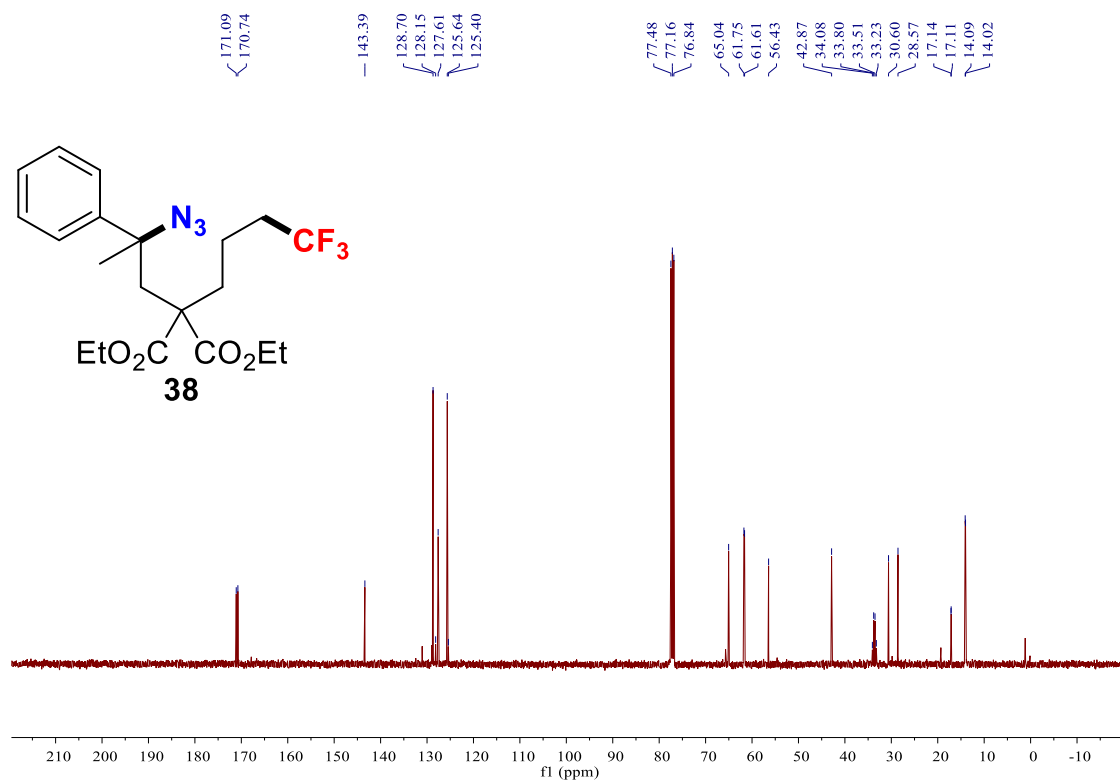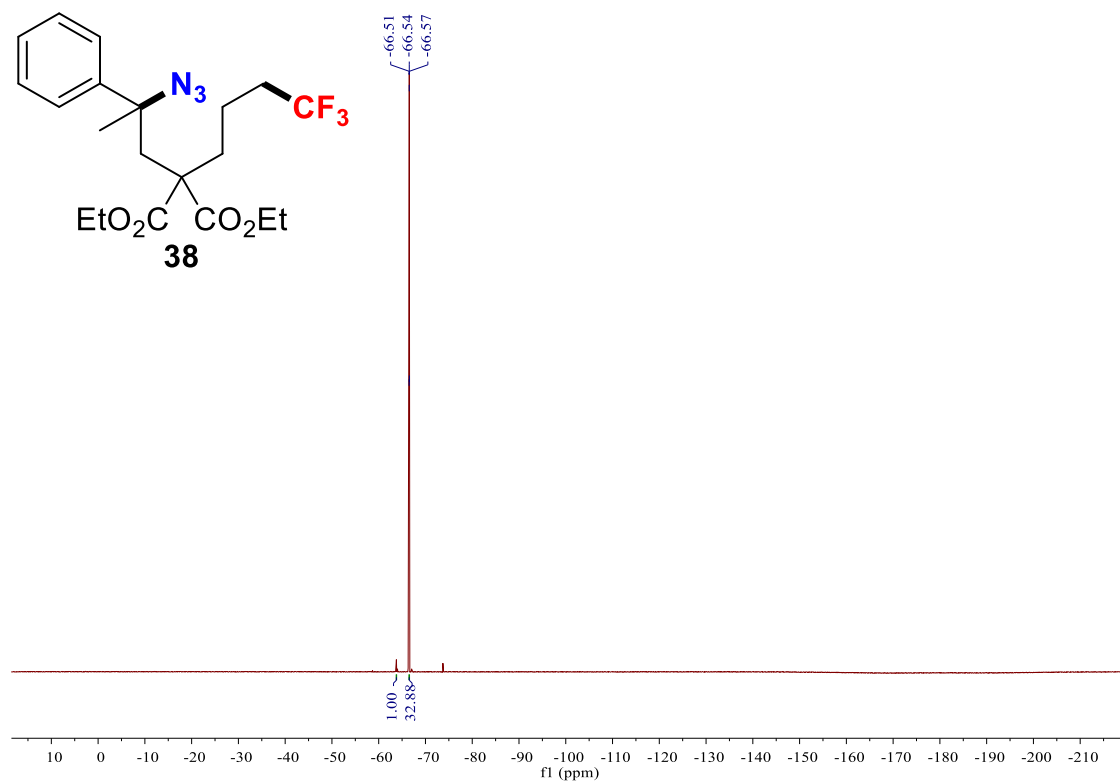

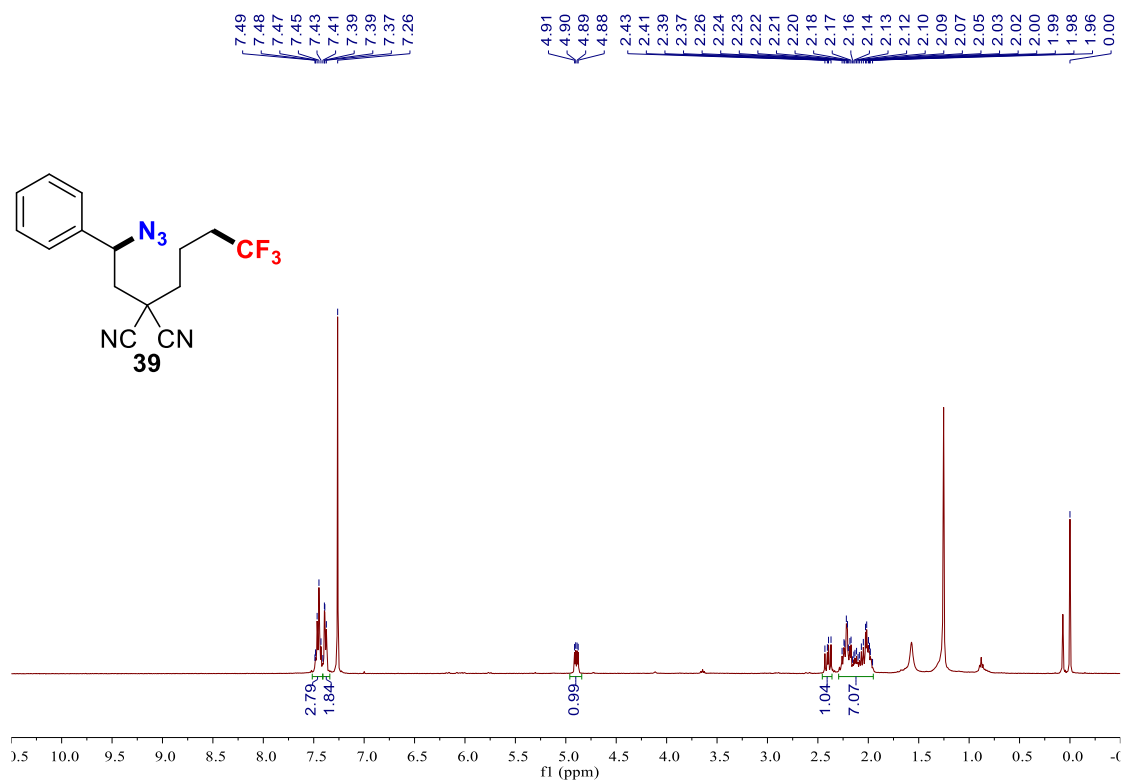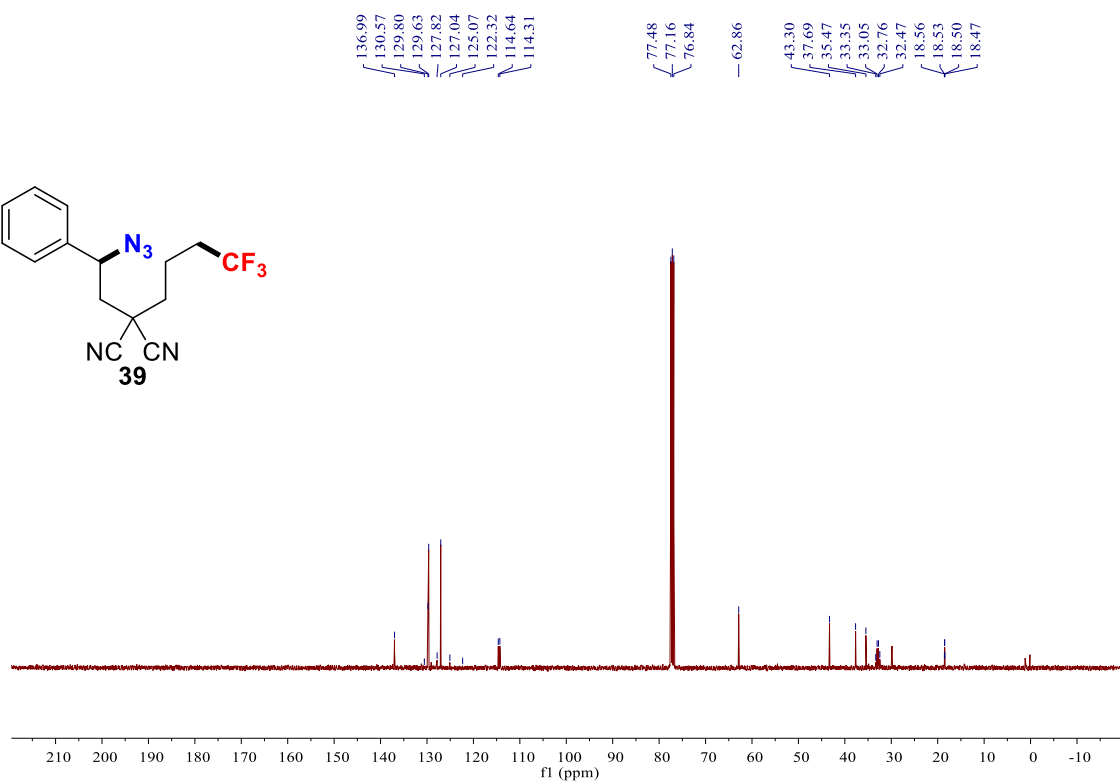

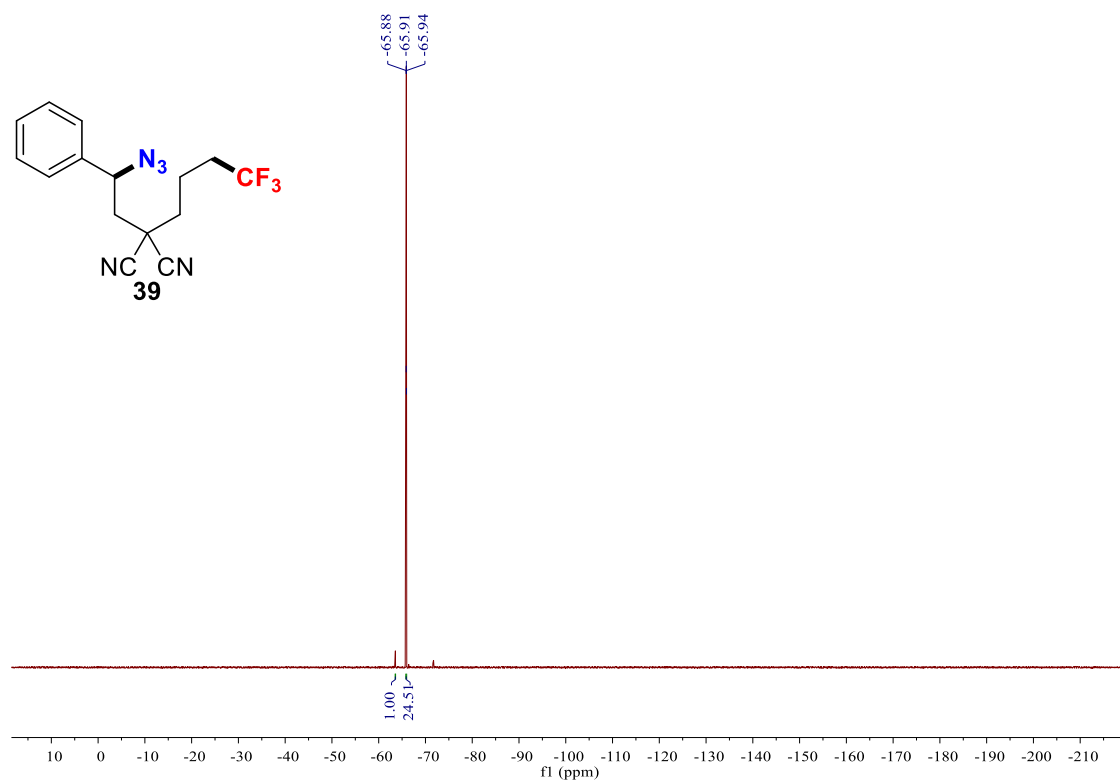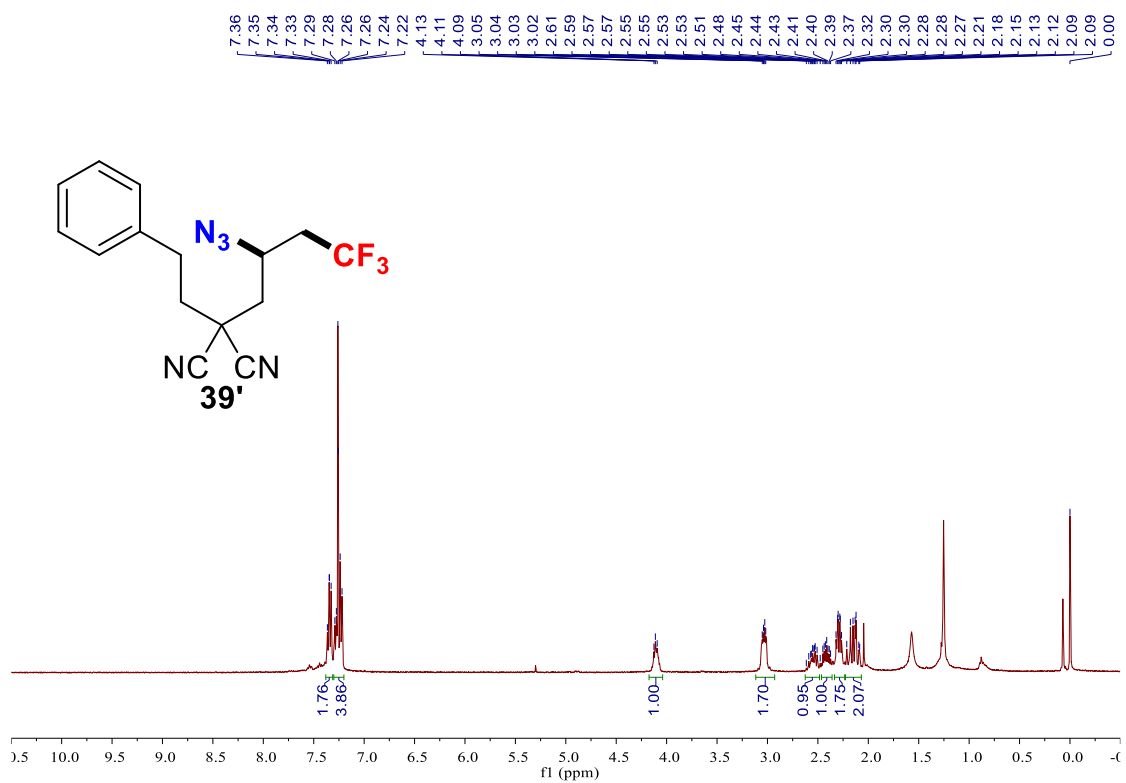

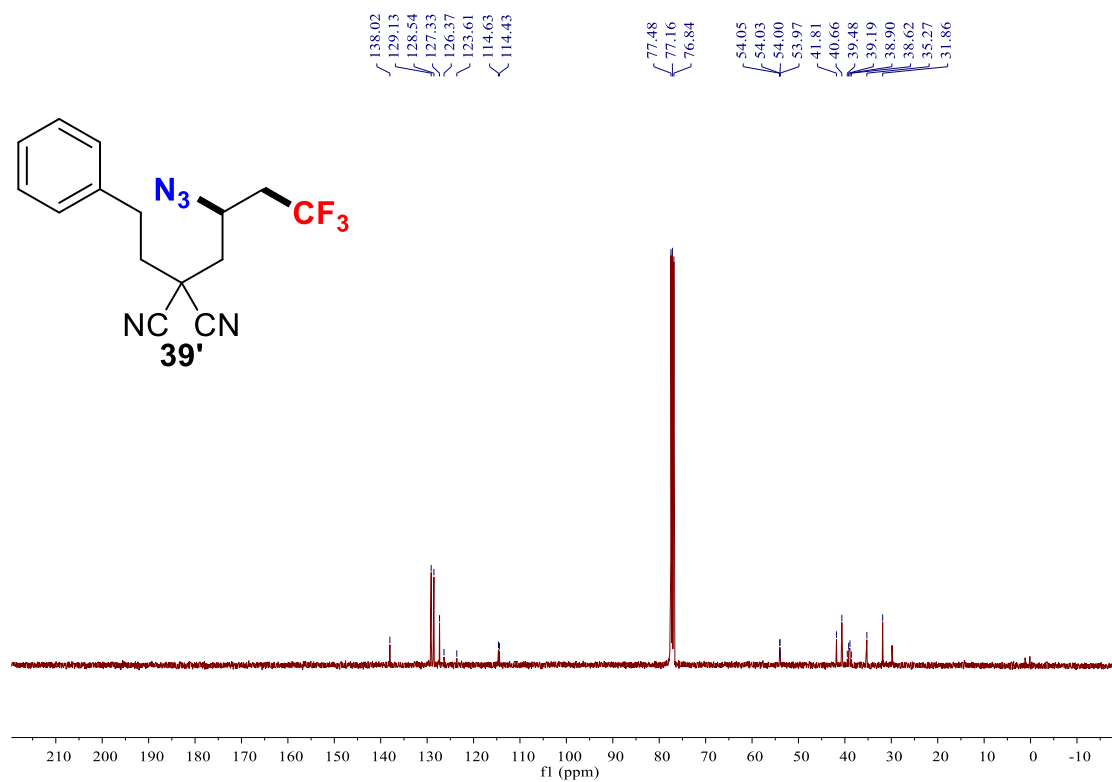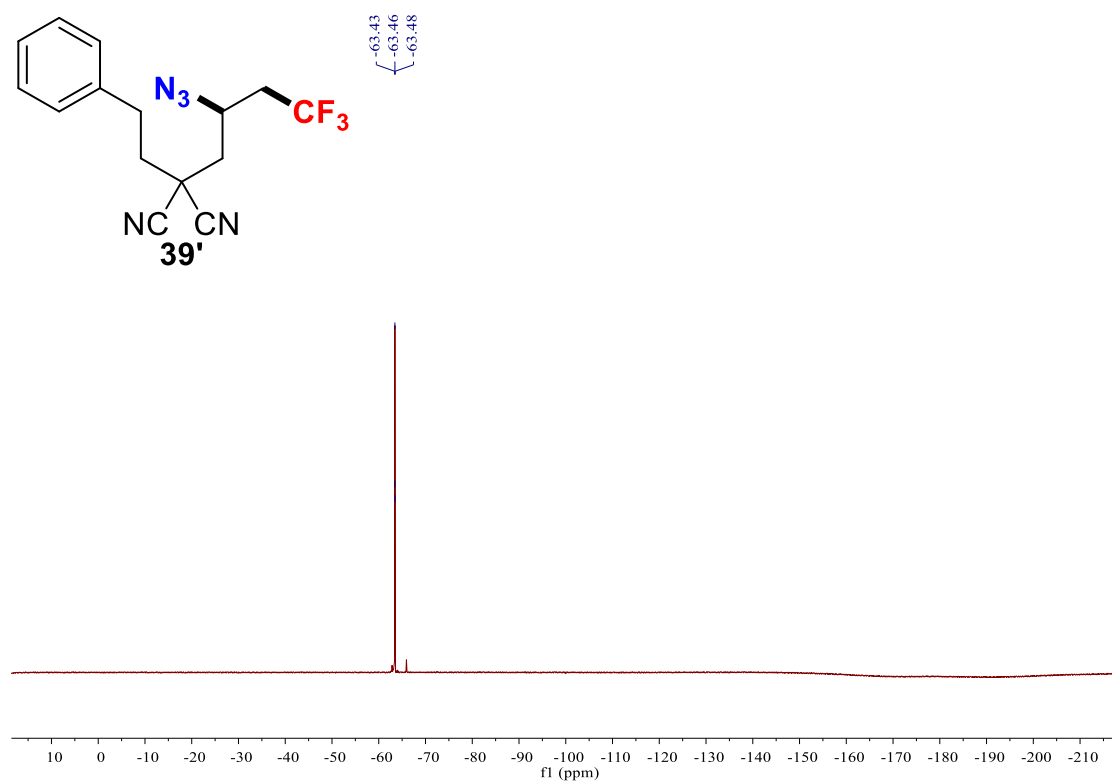



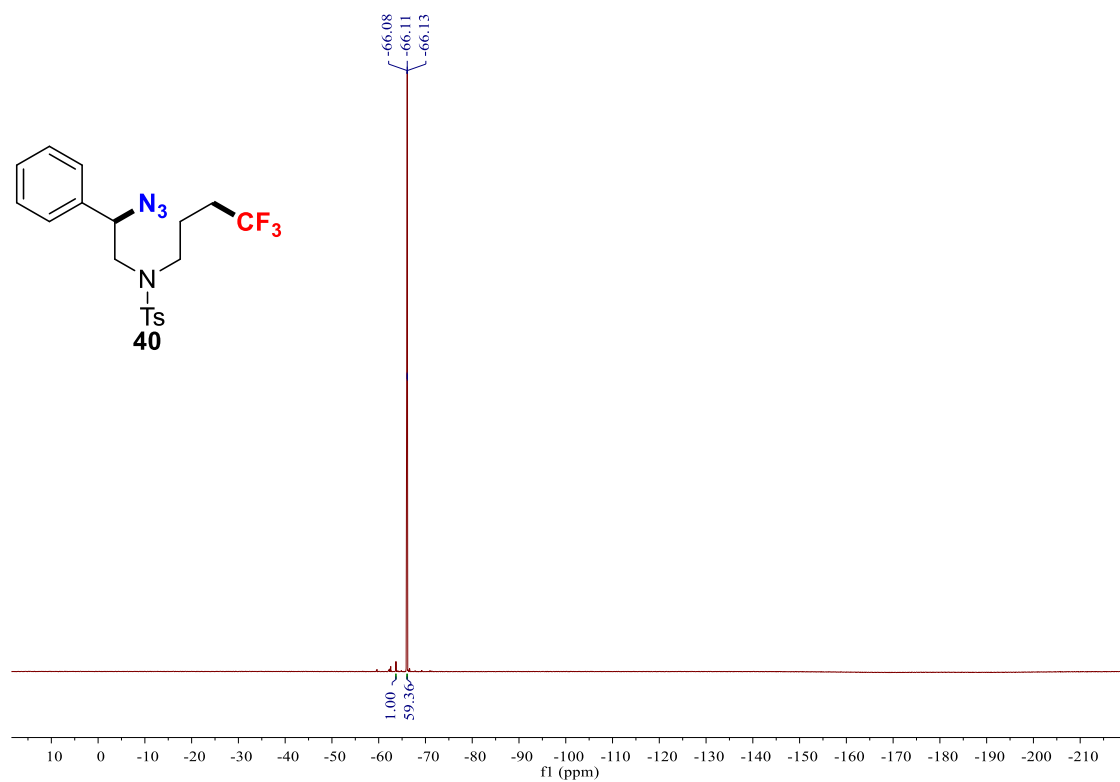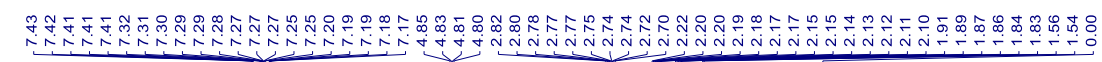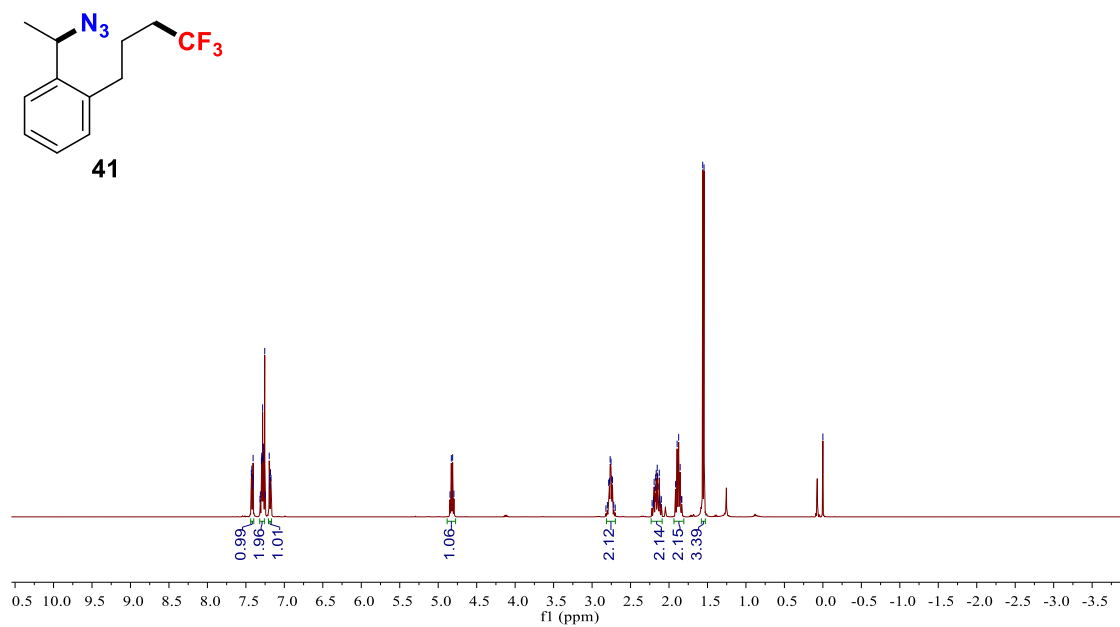



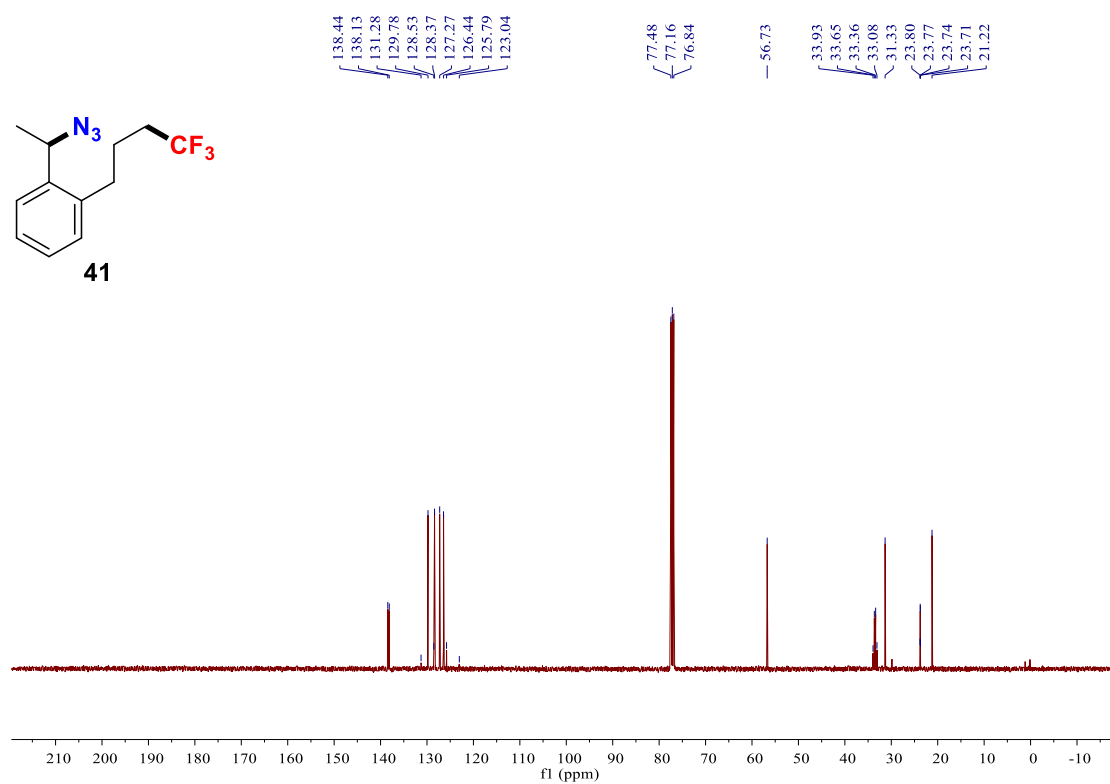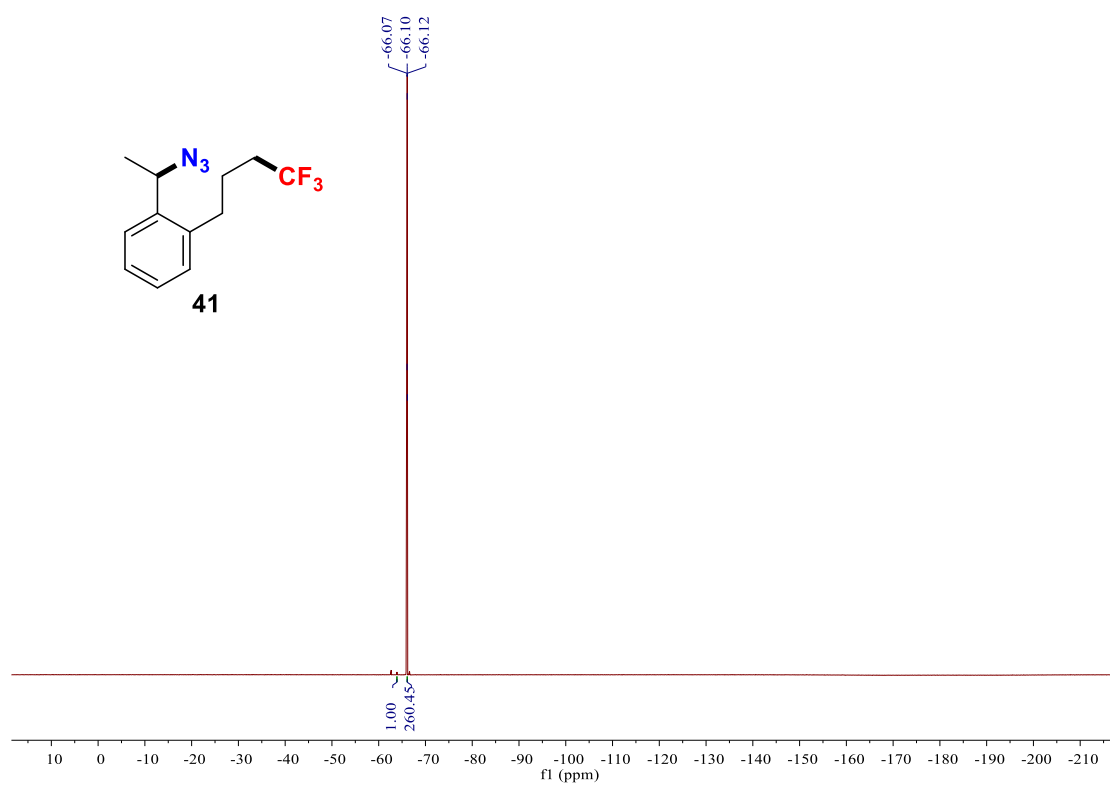

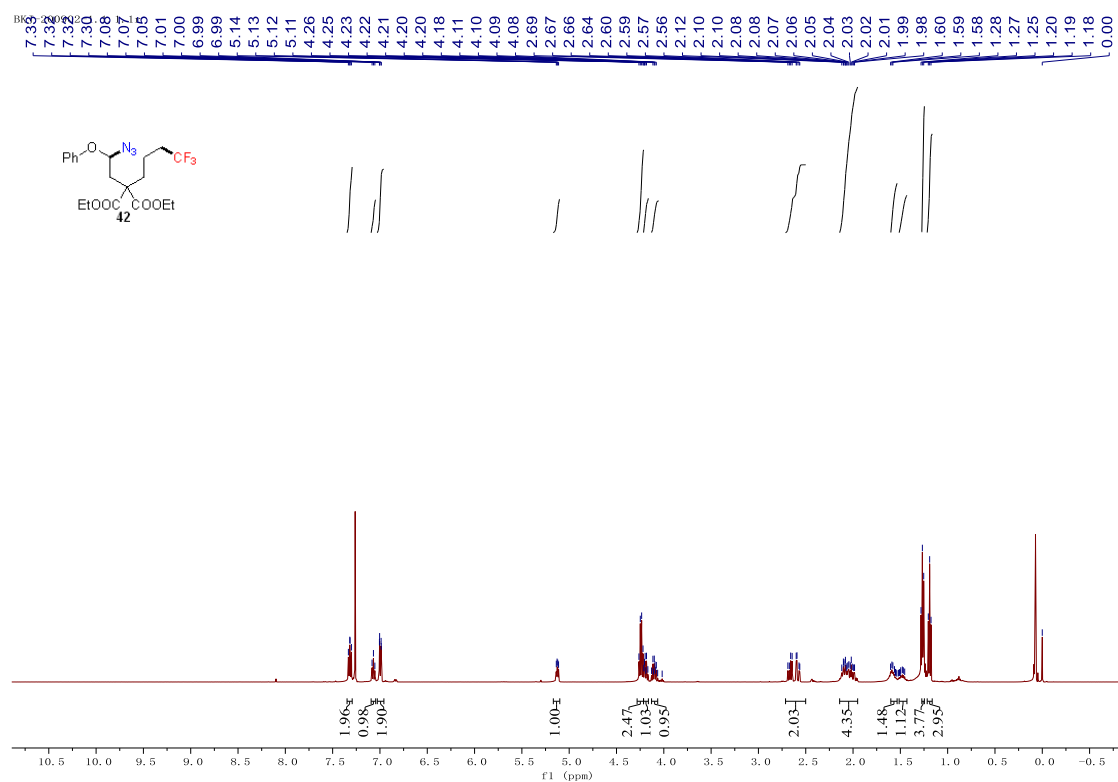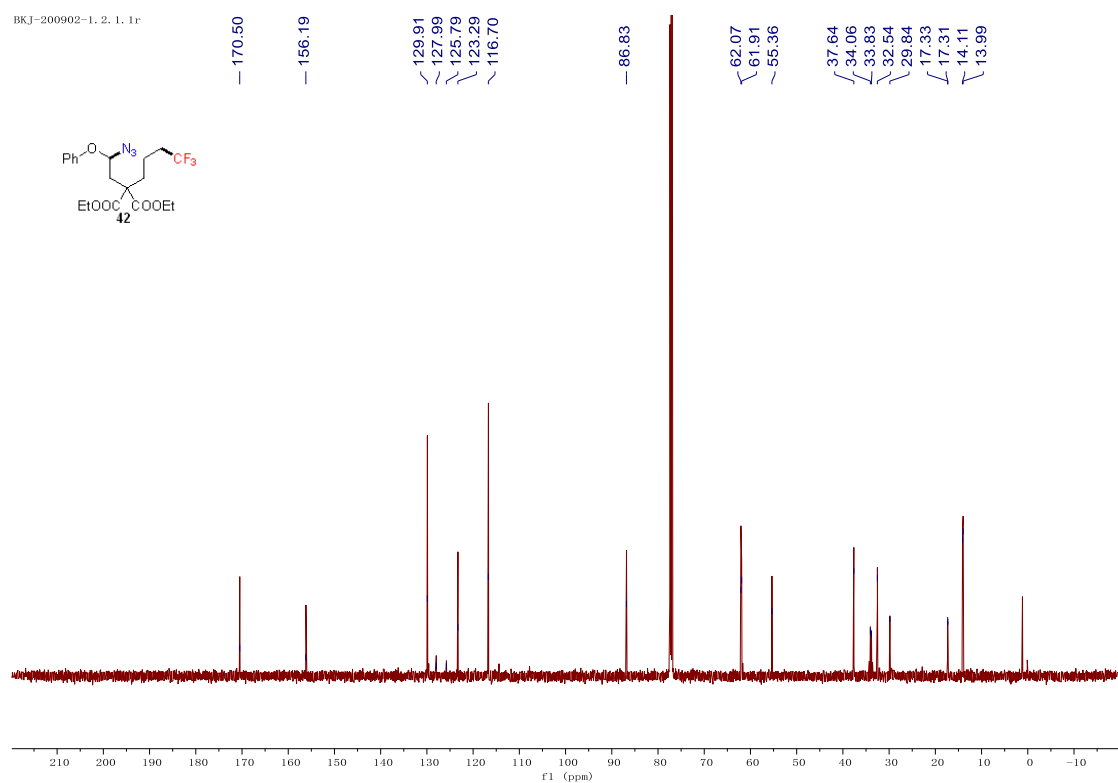

BKJ-200902-1. 3. 1. 1r

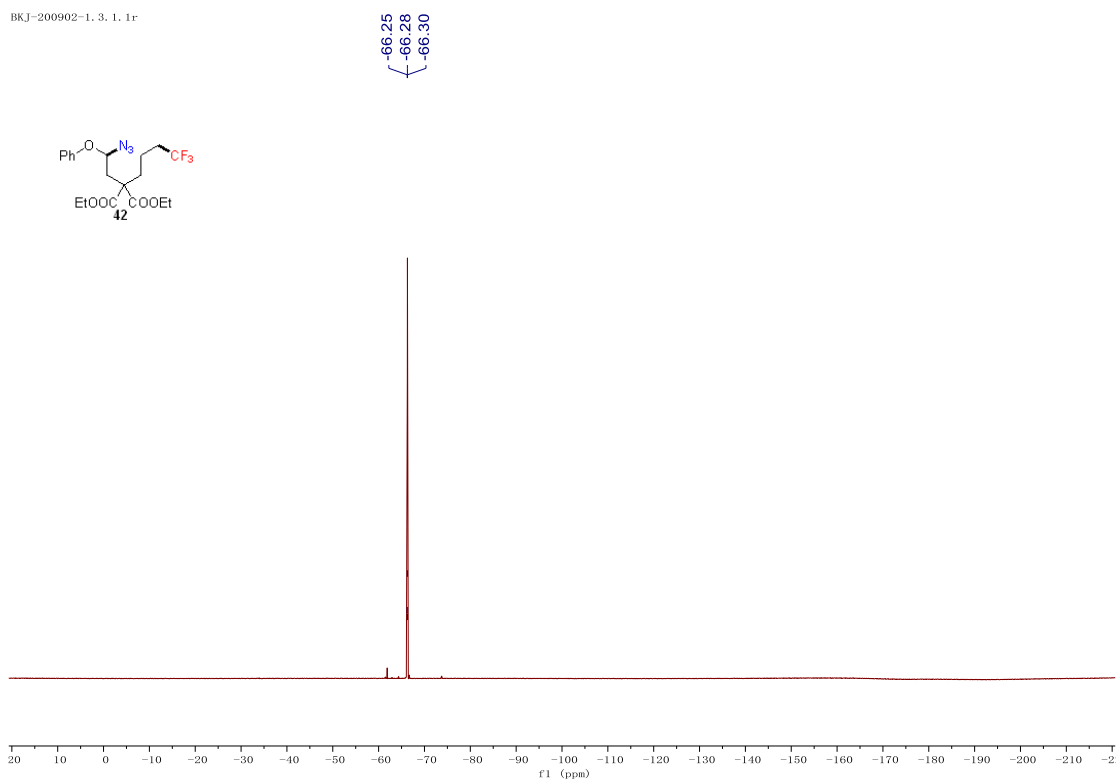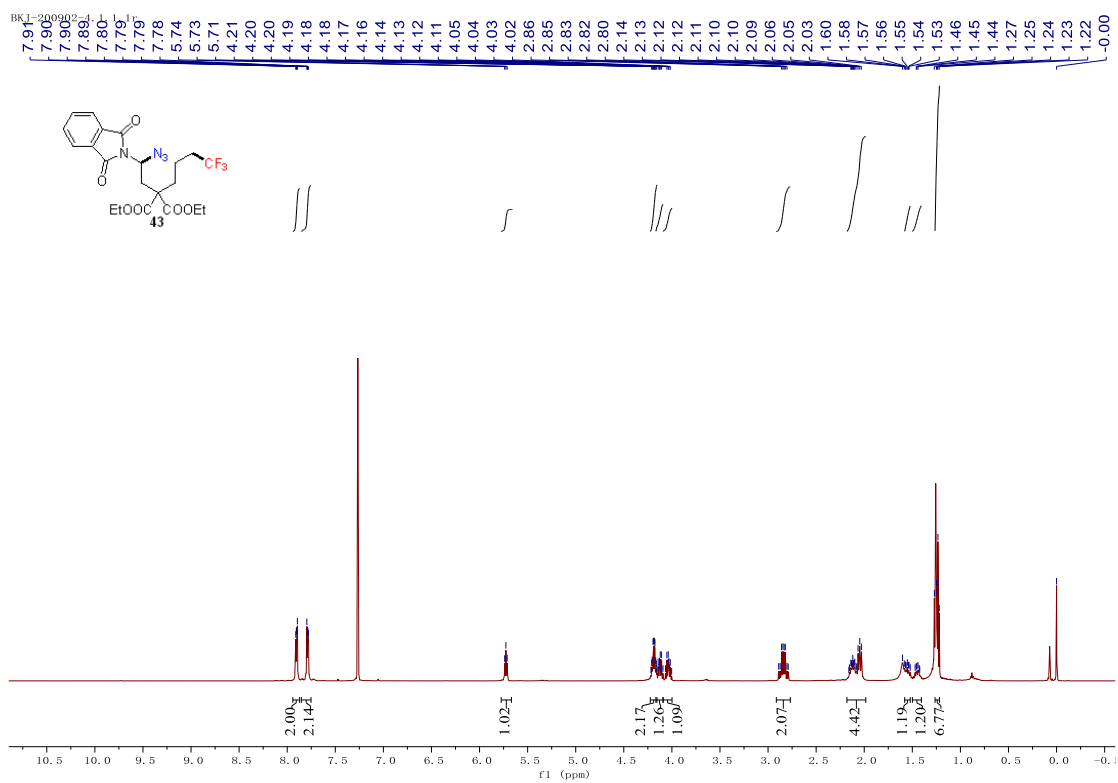

BKJ-200902-4. 2. 1. 1r

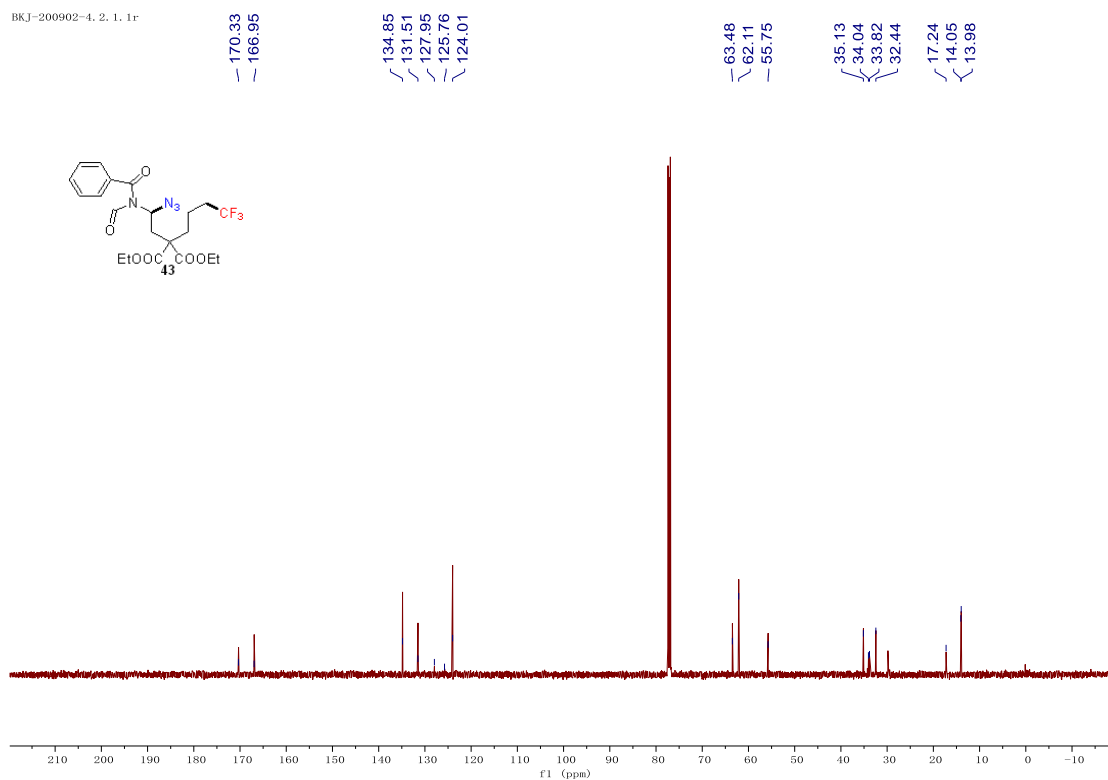

BKJ-200902-4. 3. 1. 1r

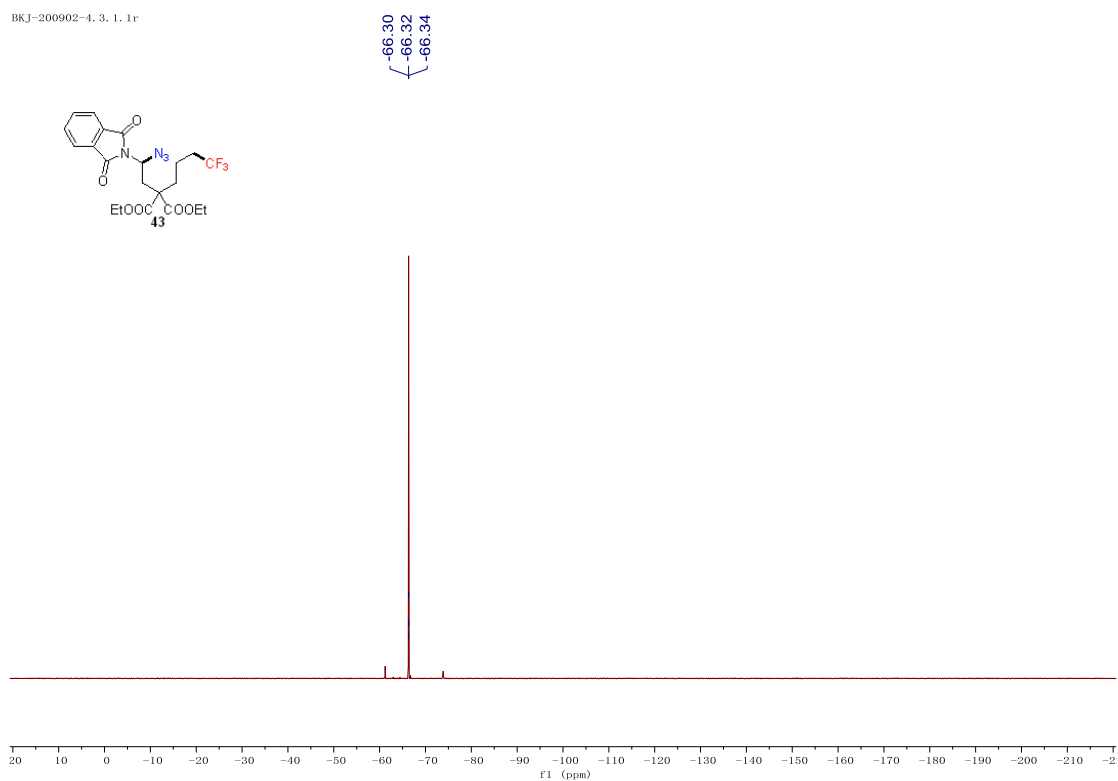



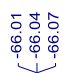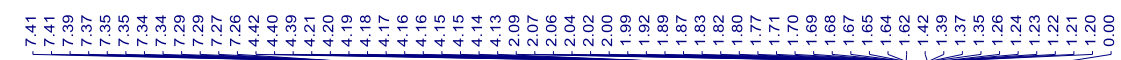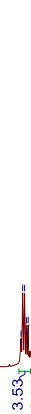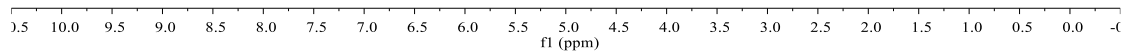

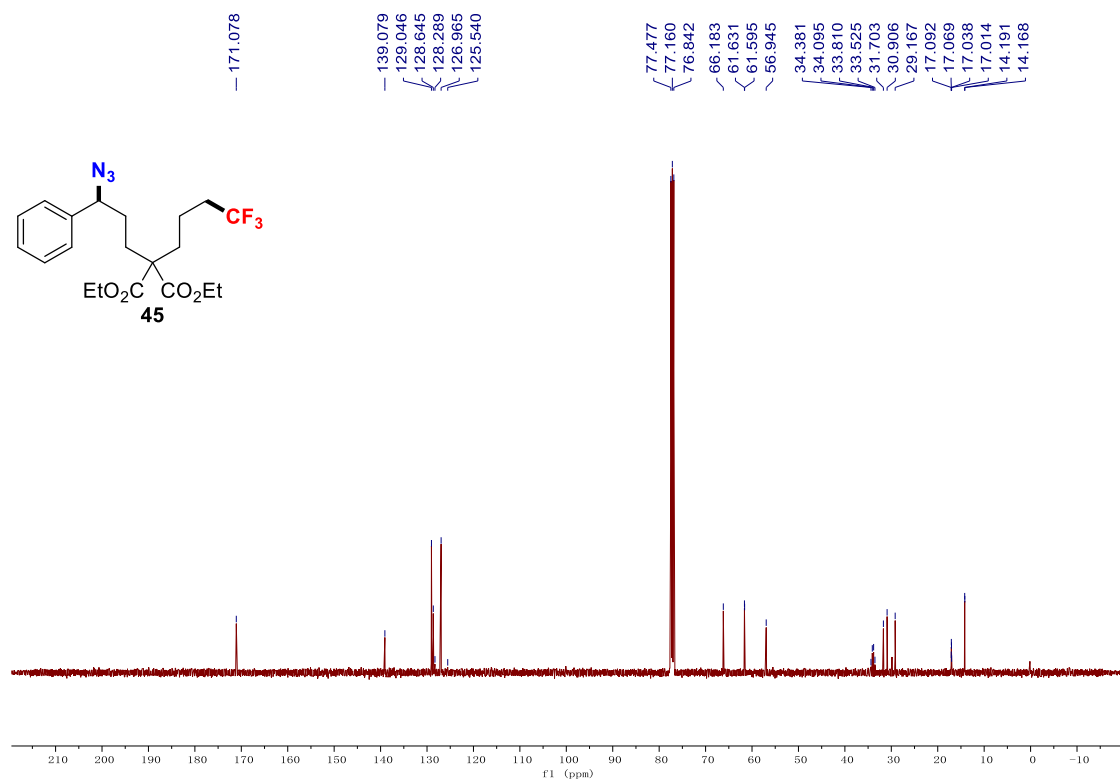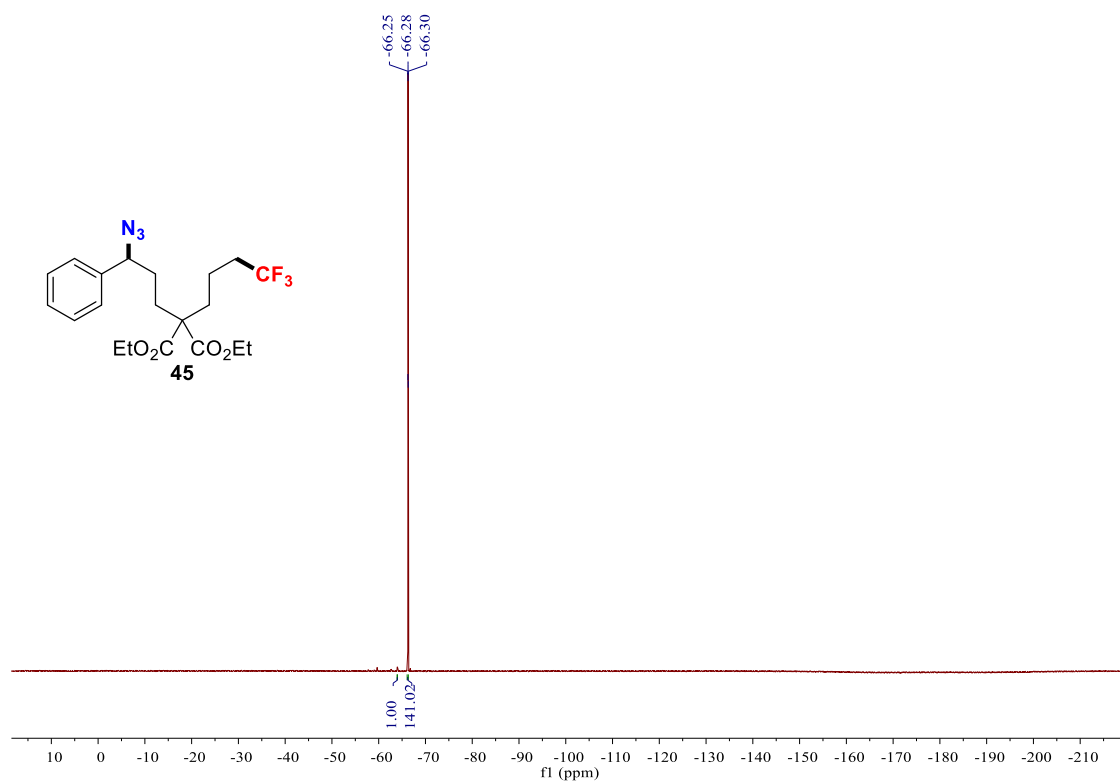

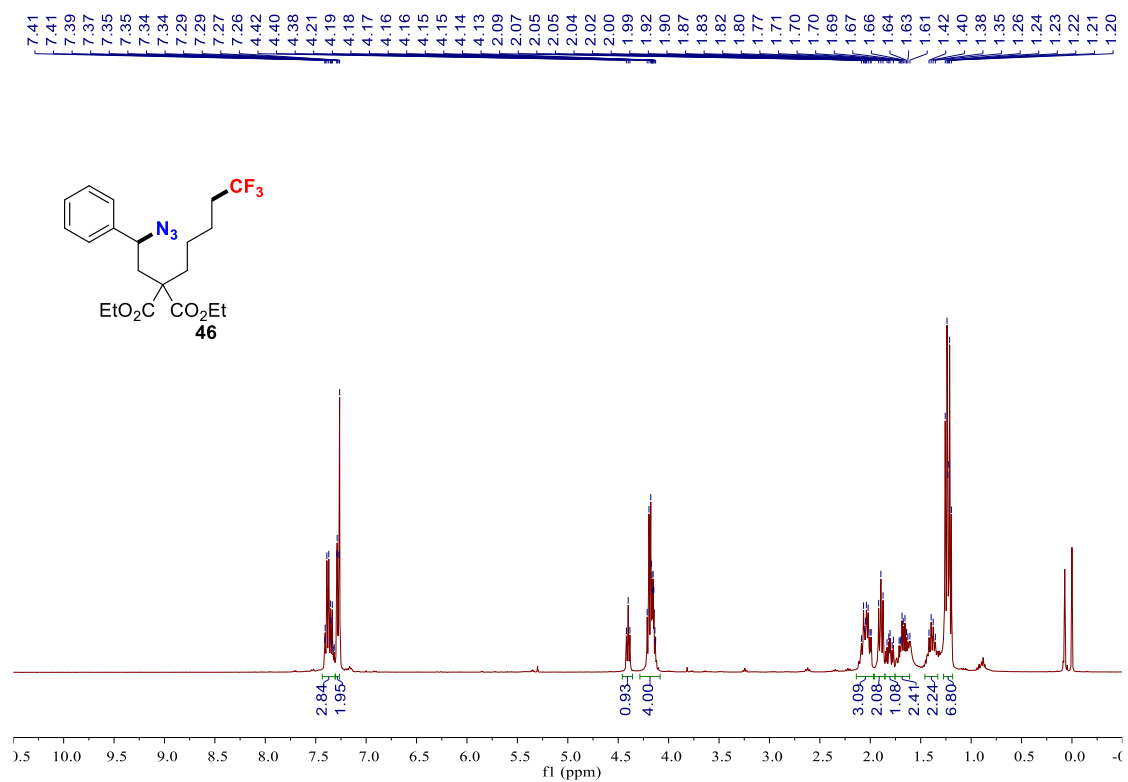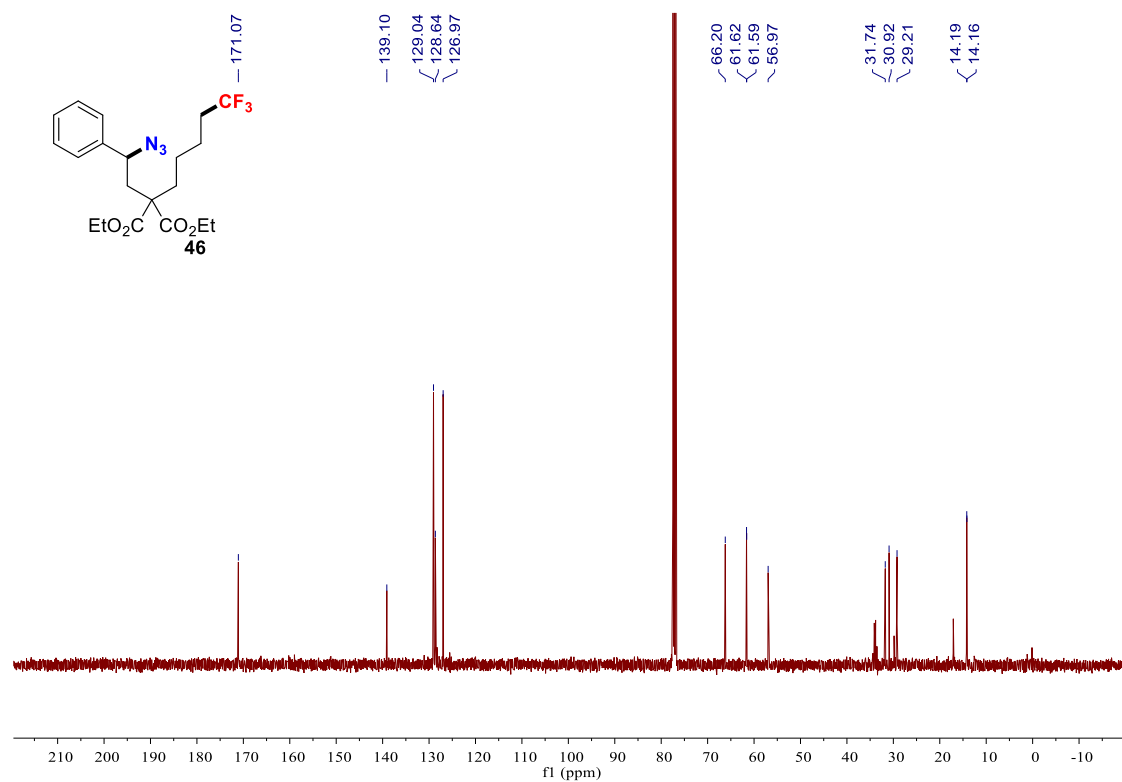



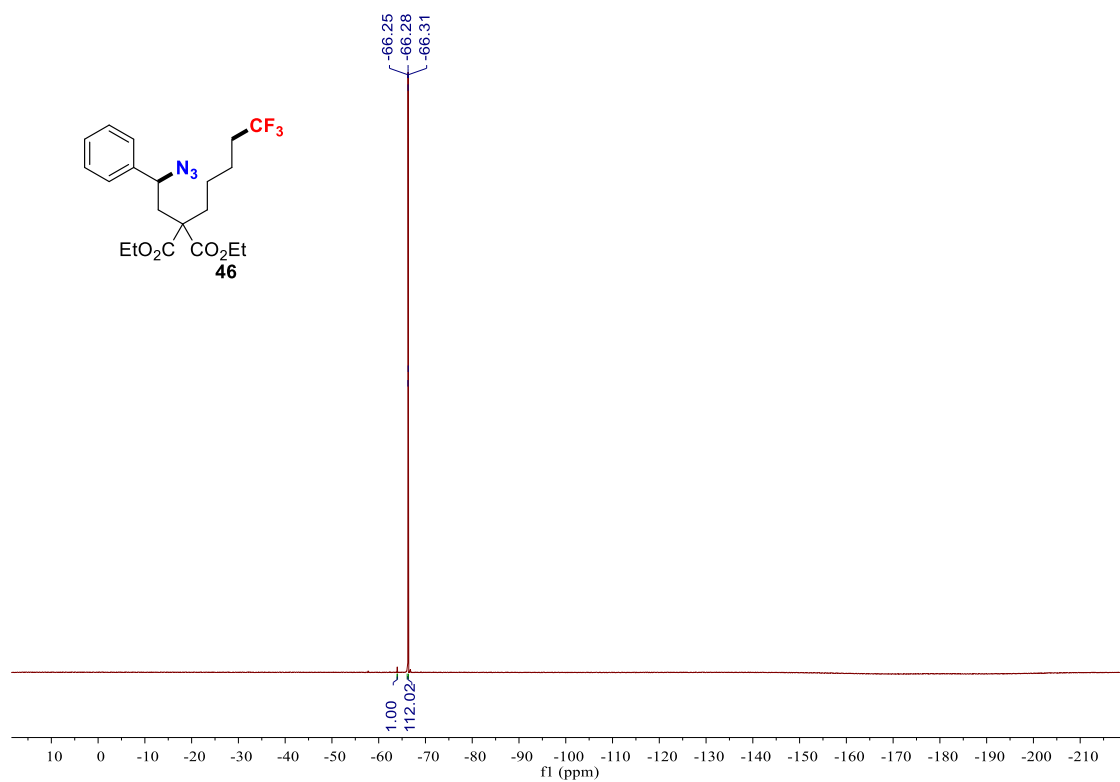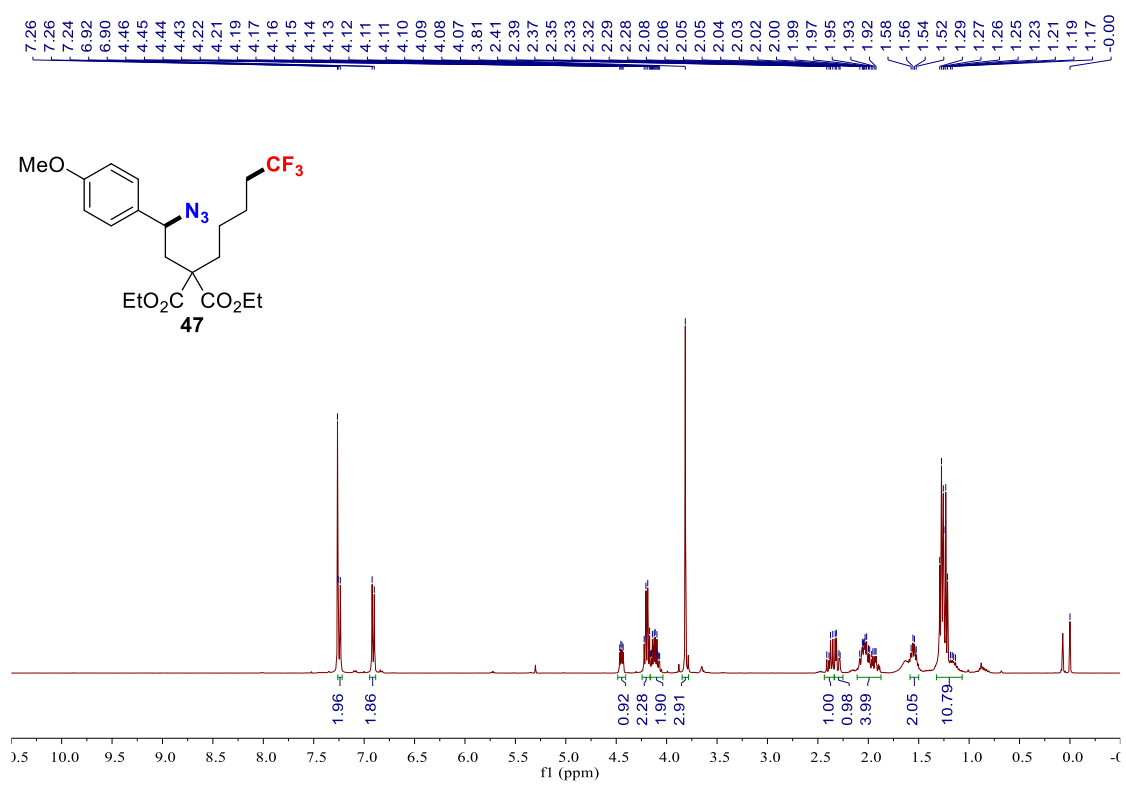

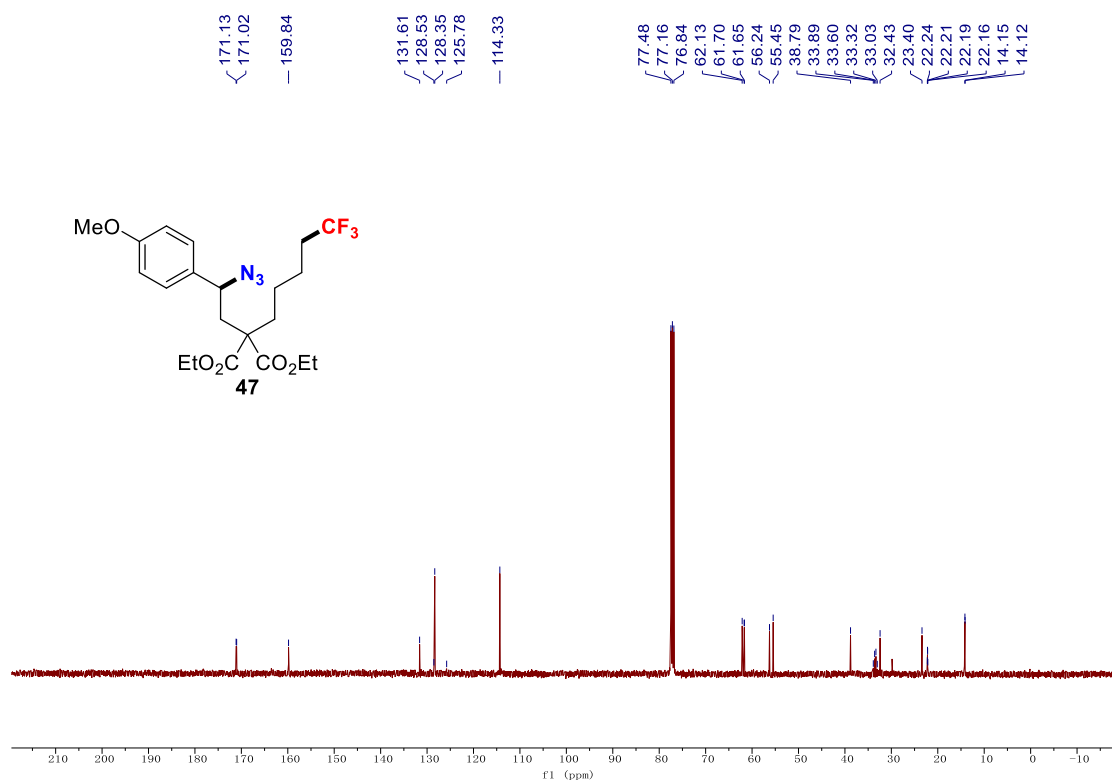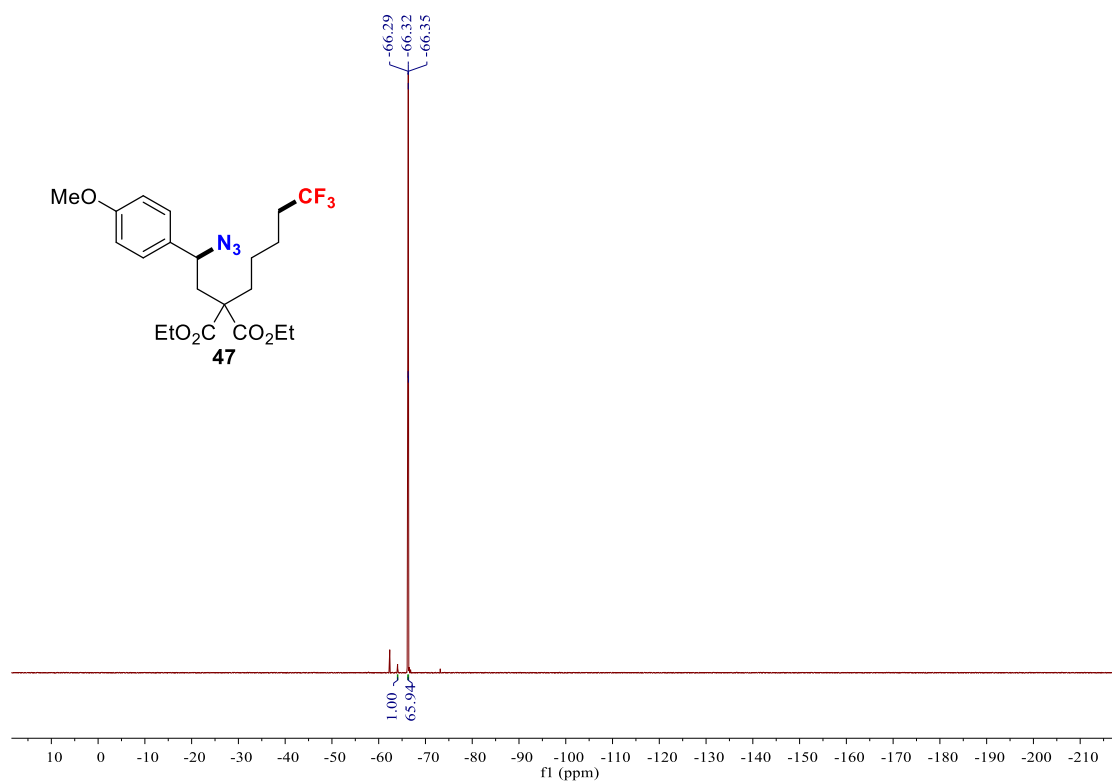

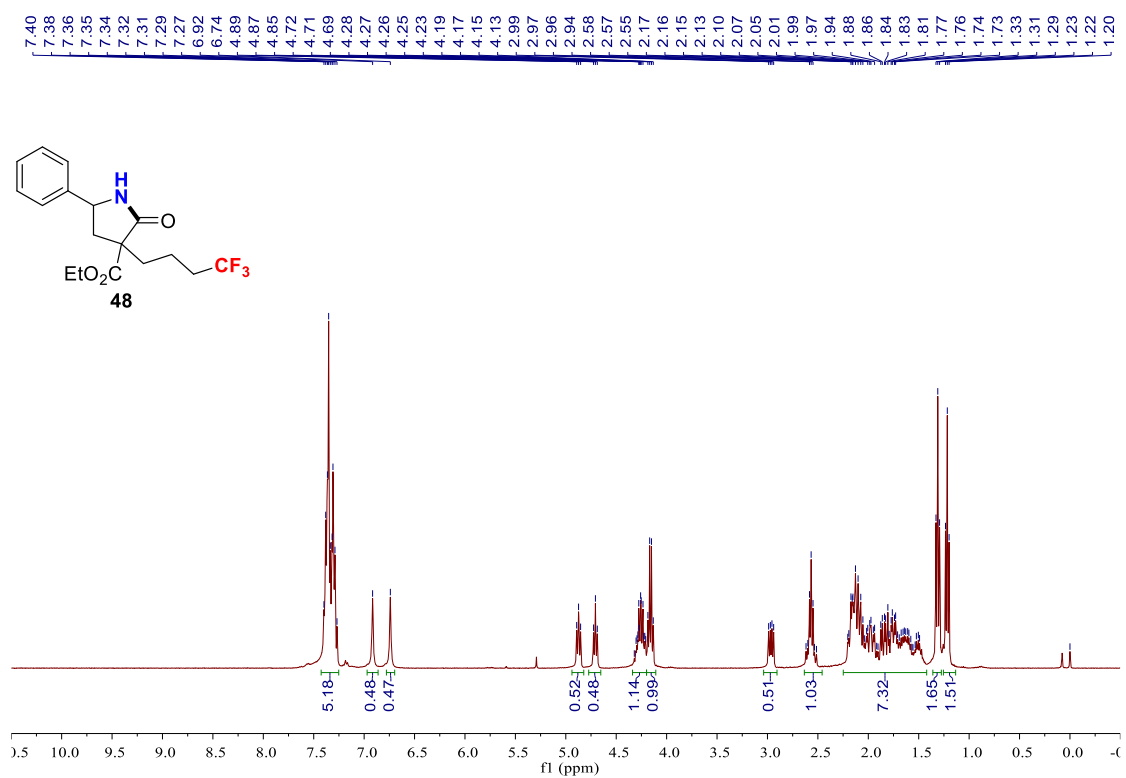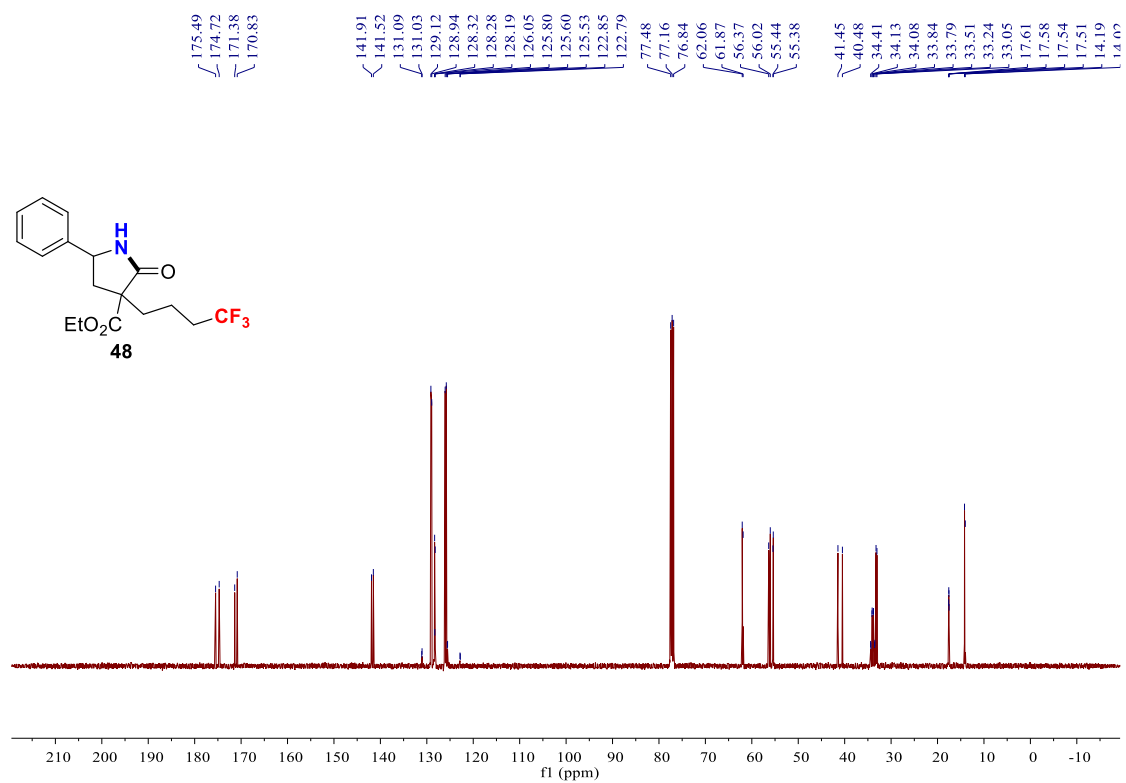

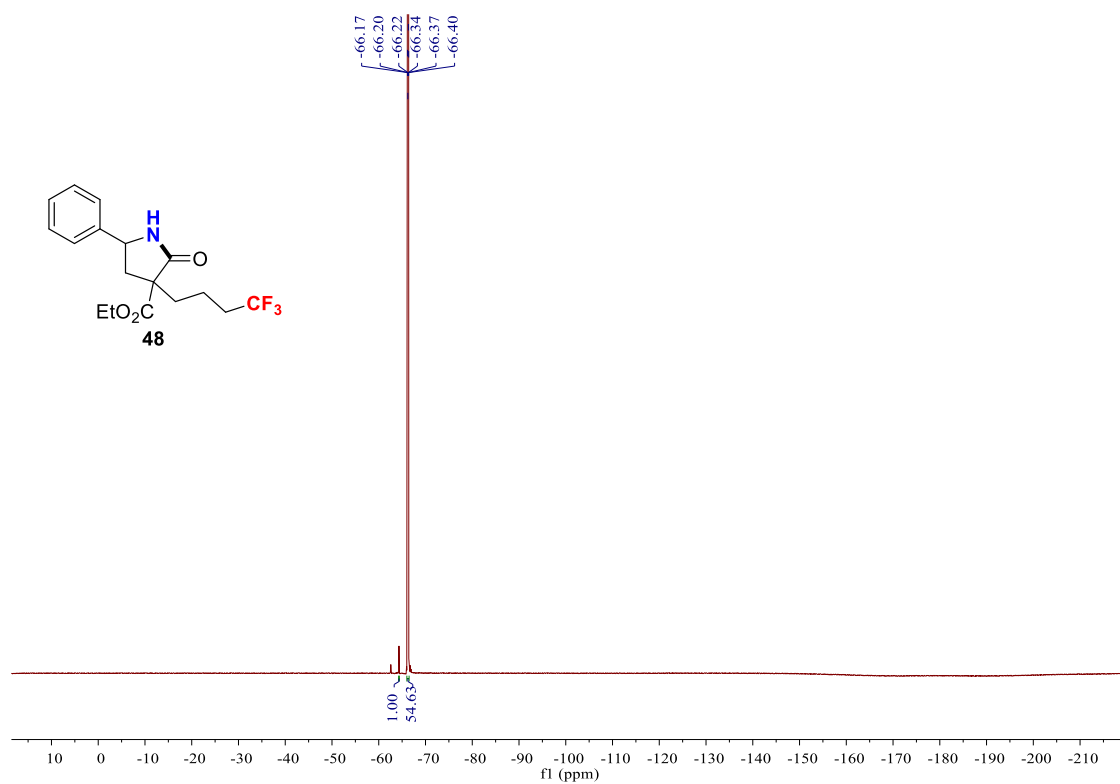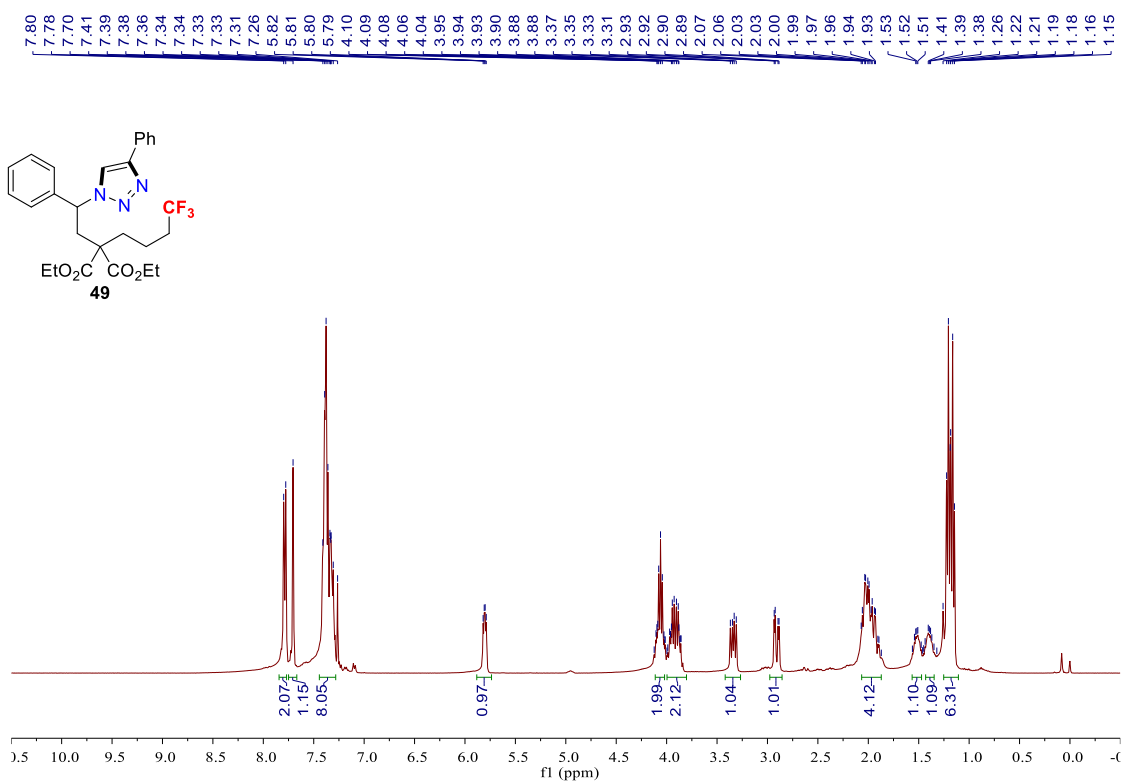

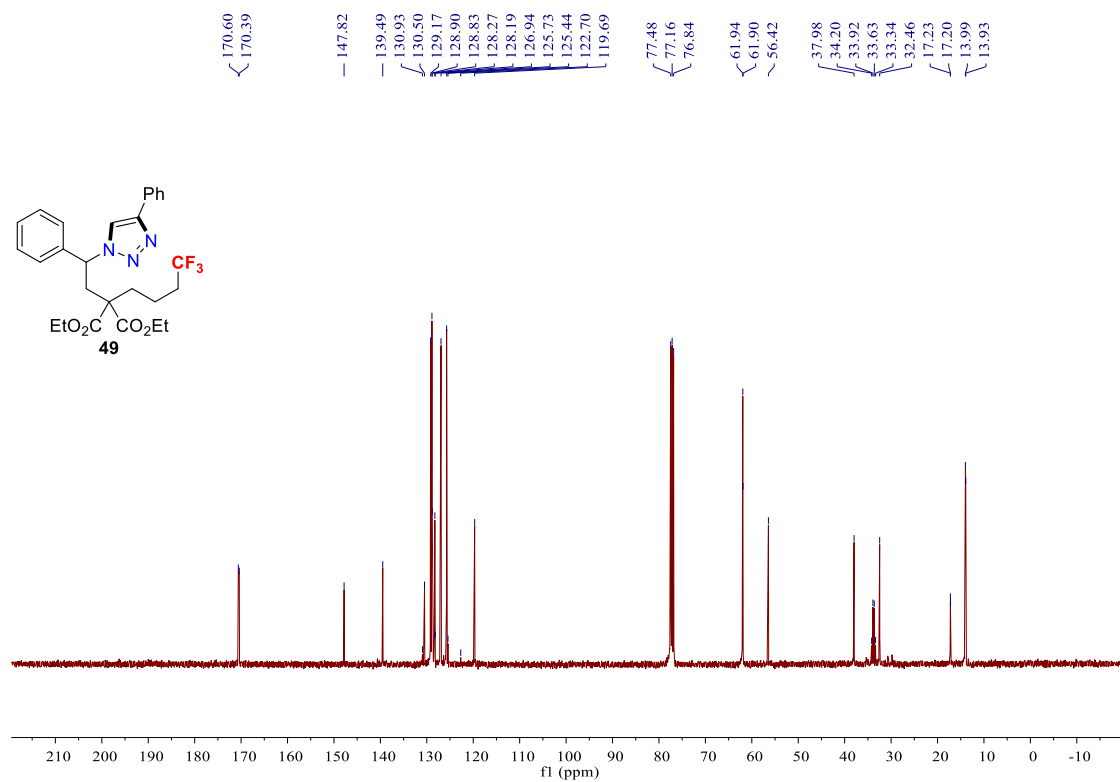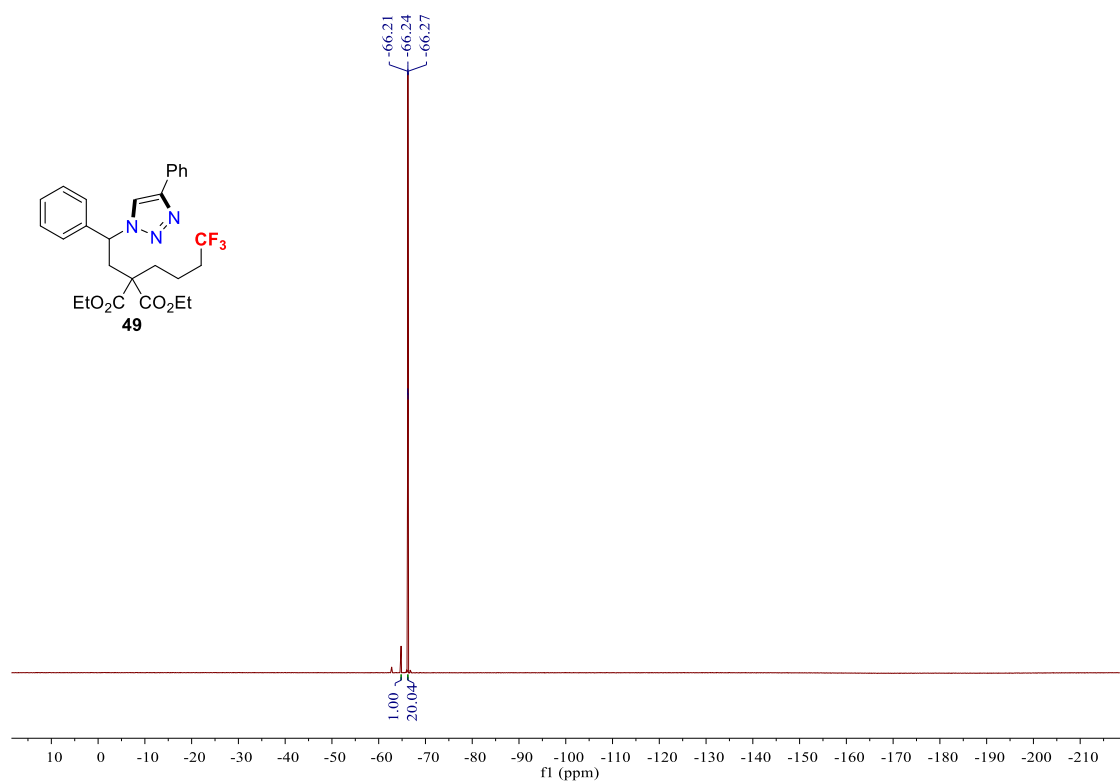

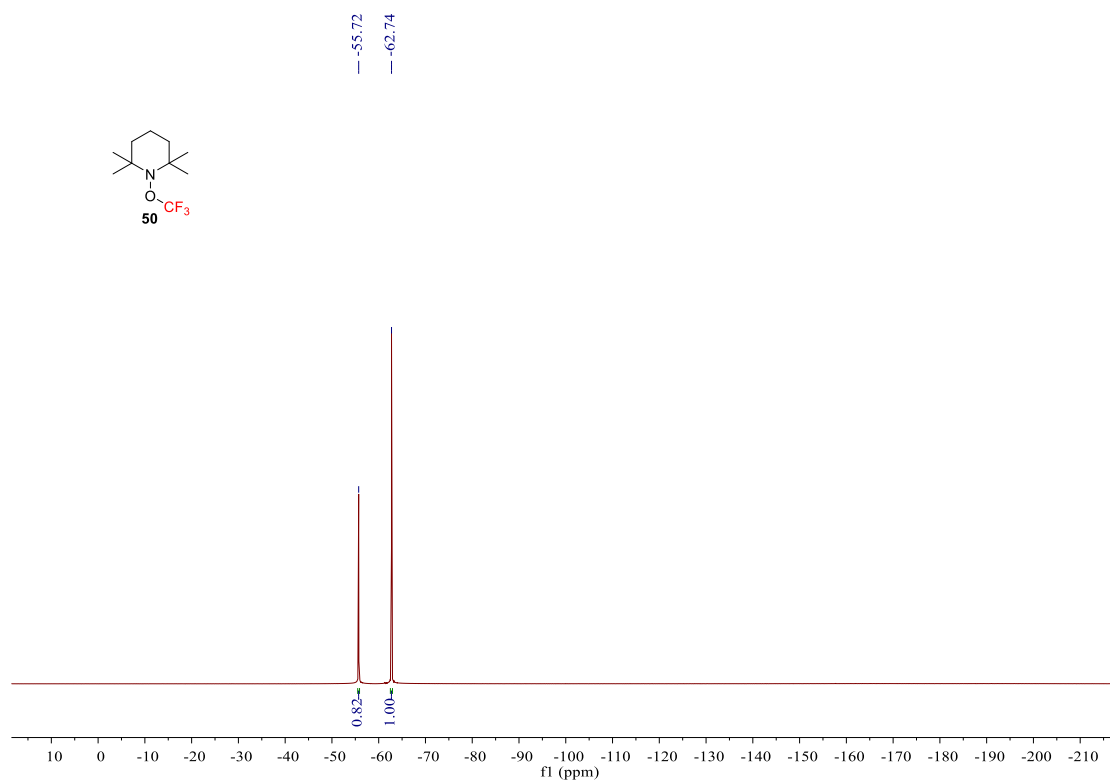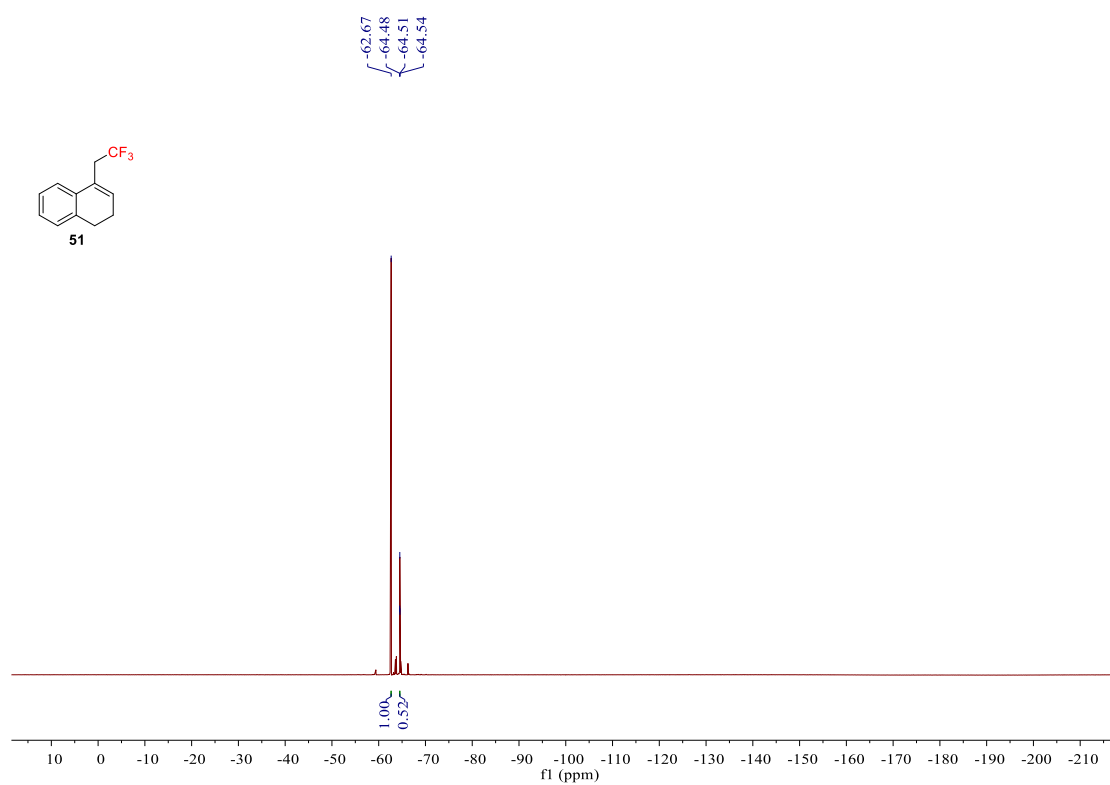

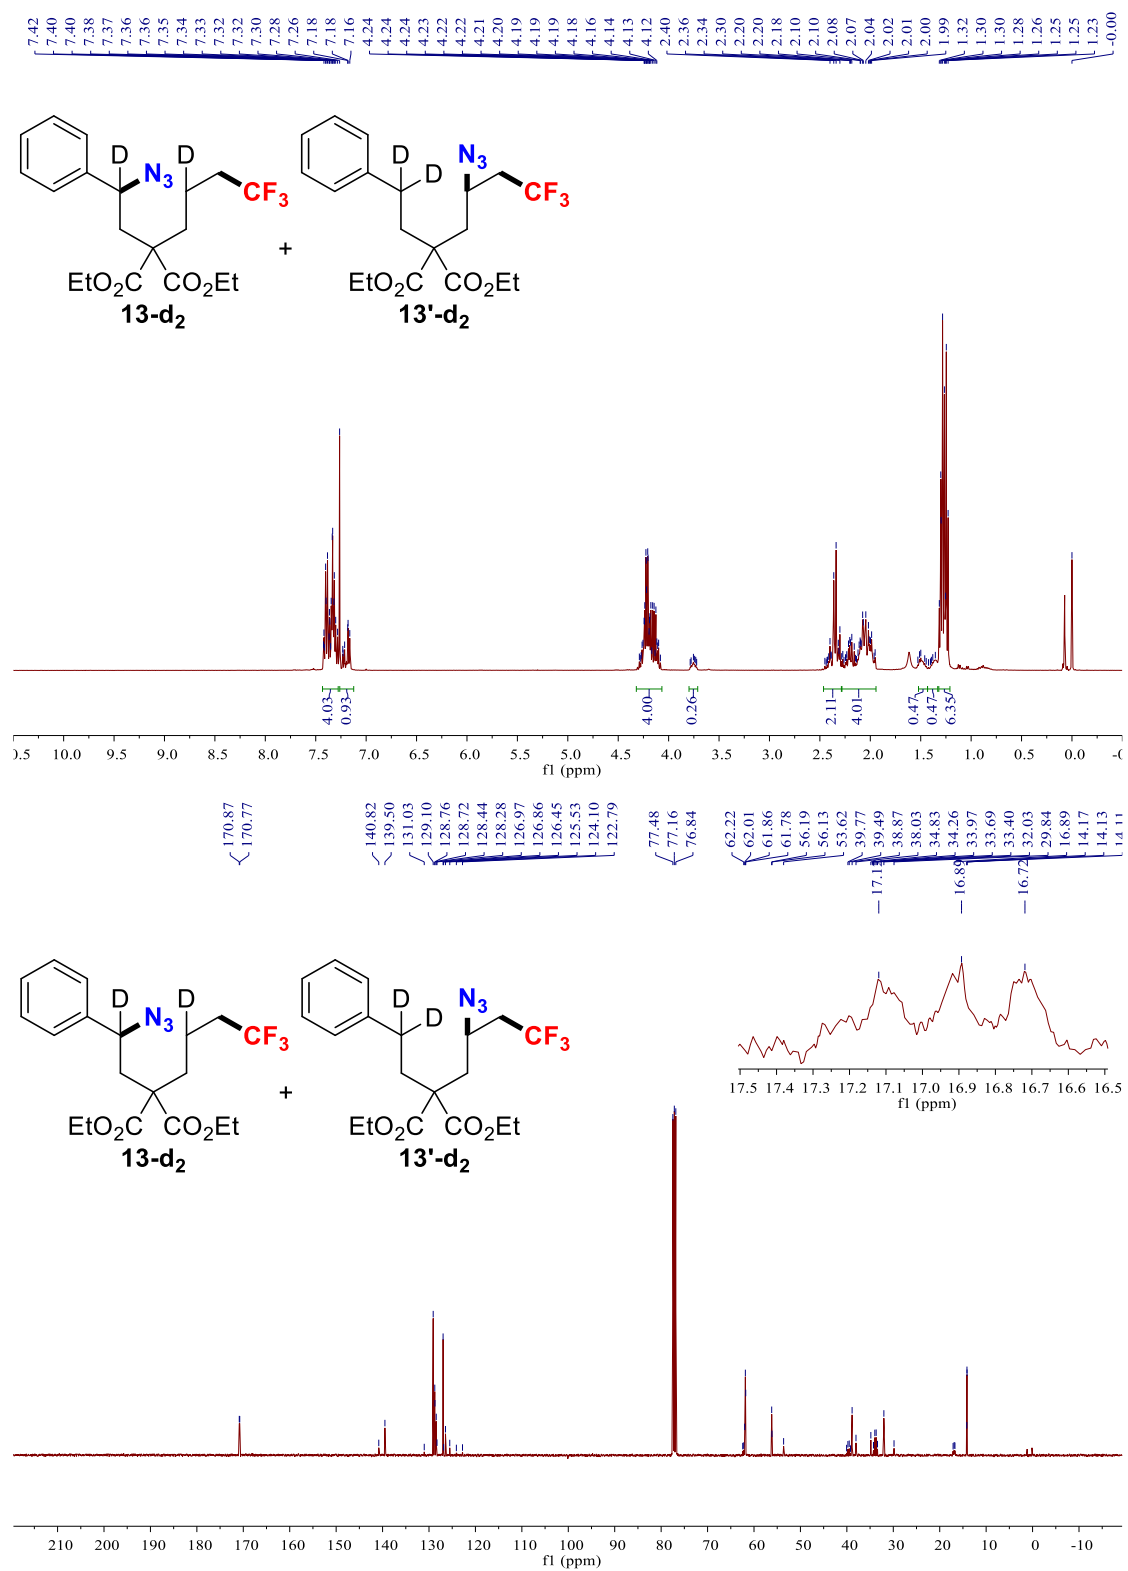

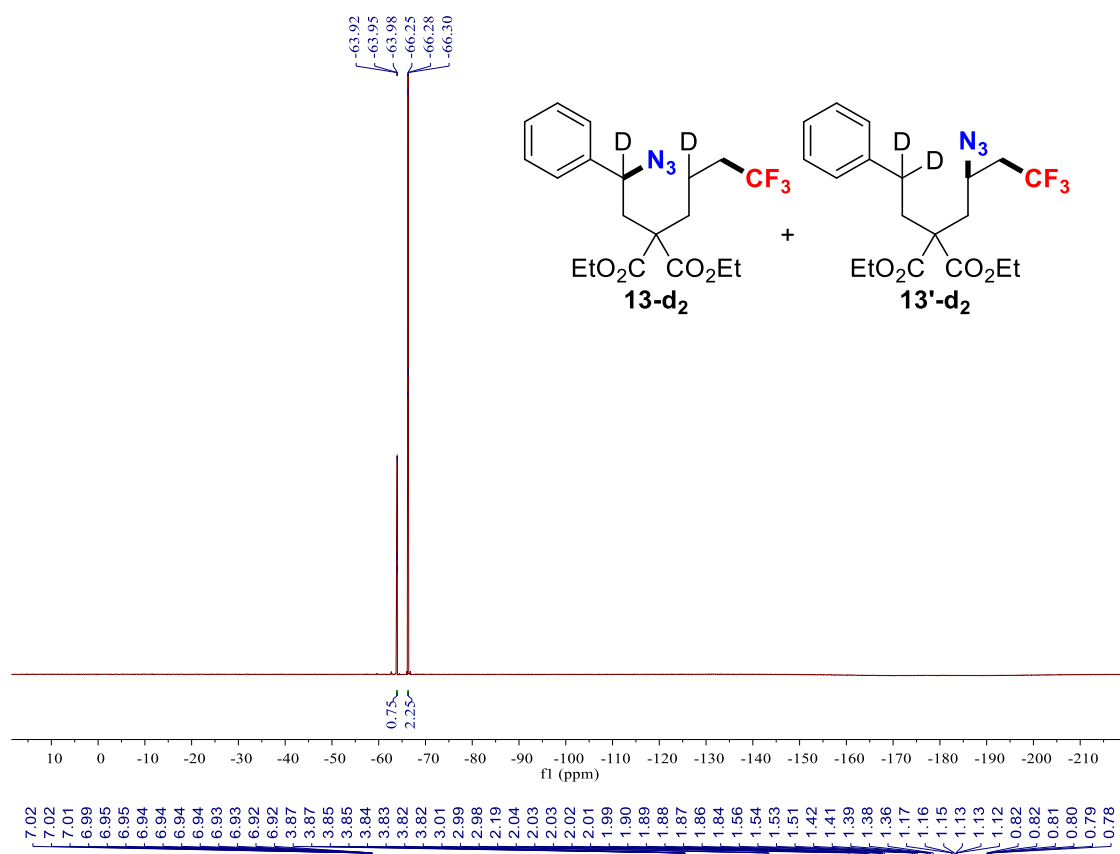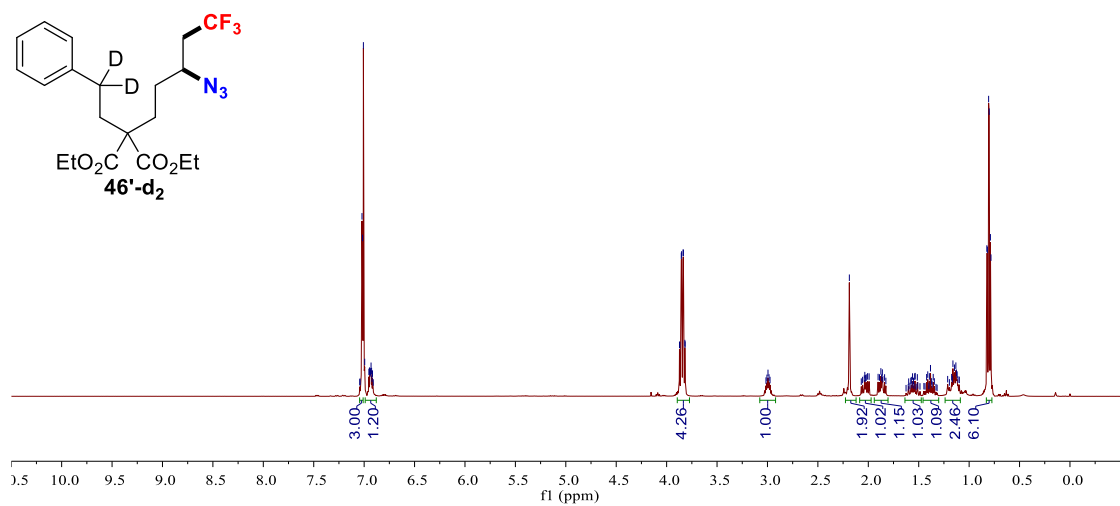



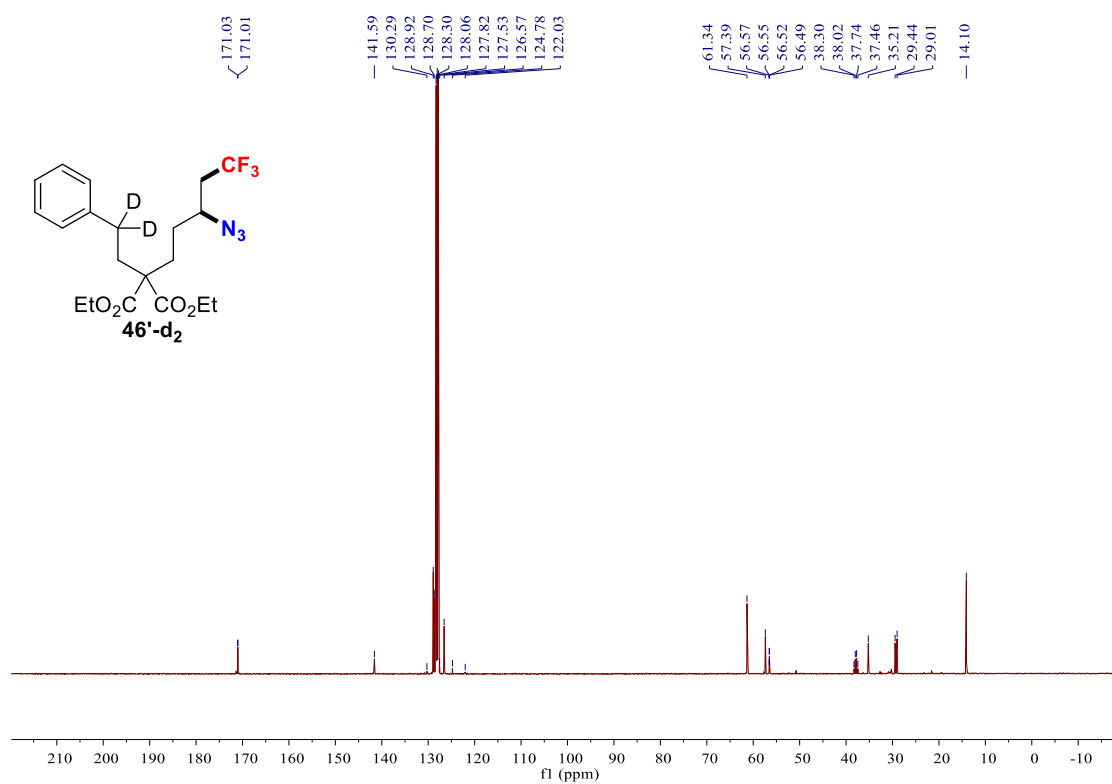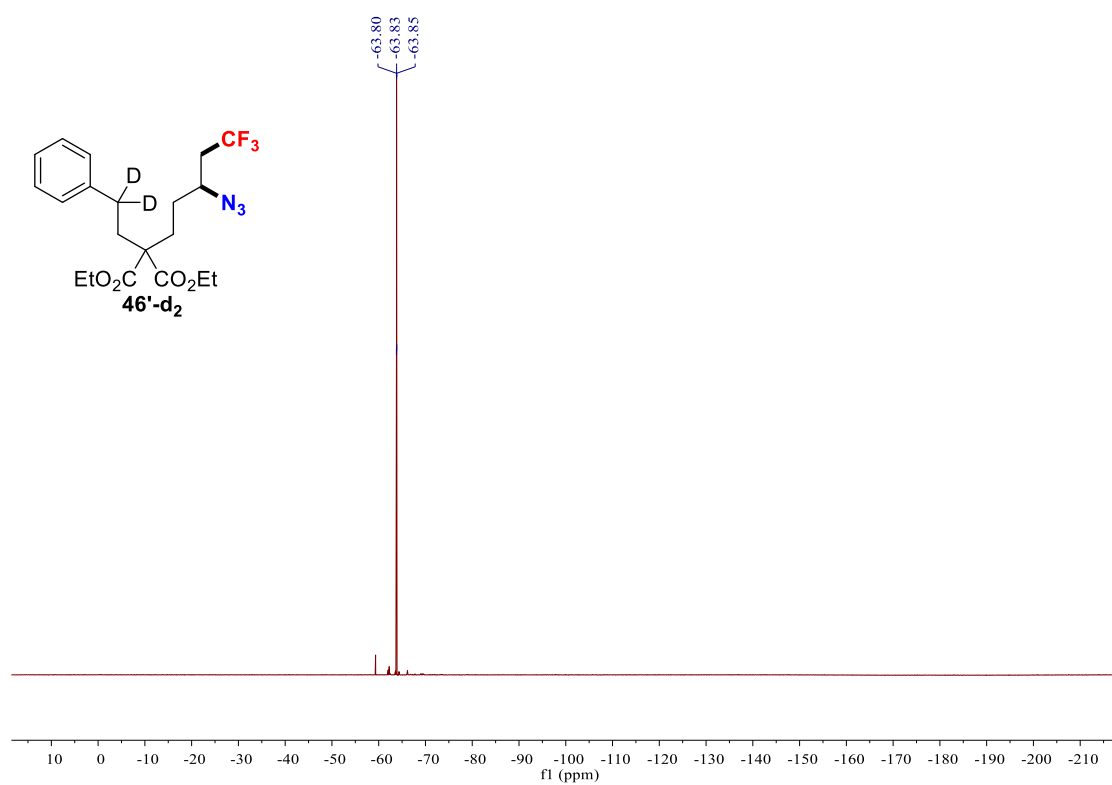

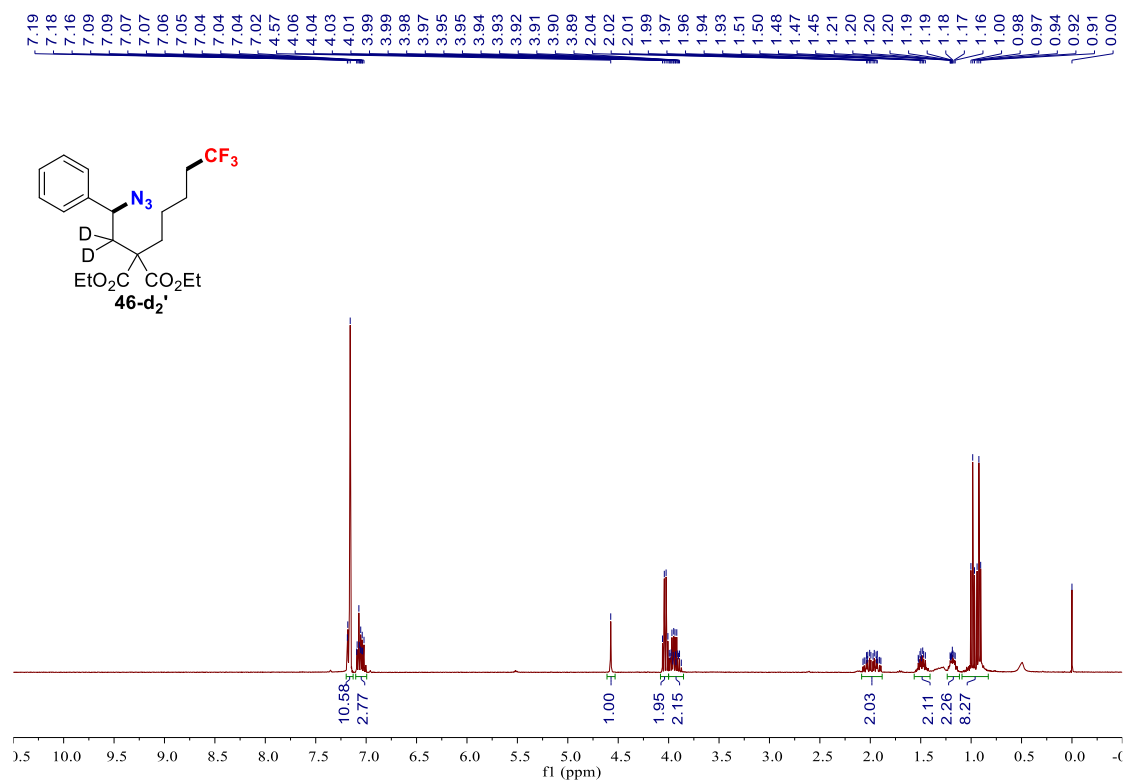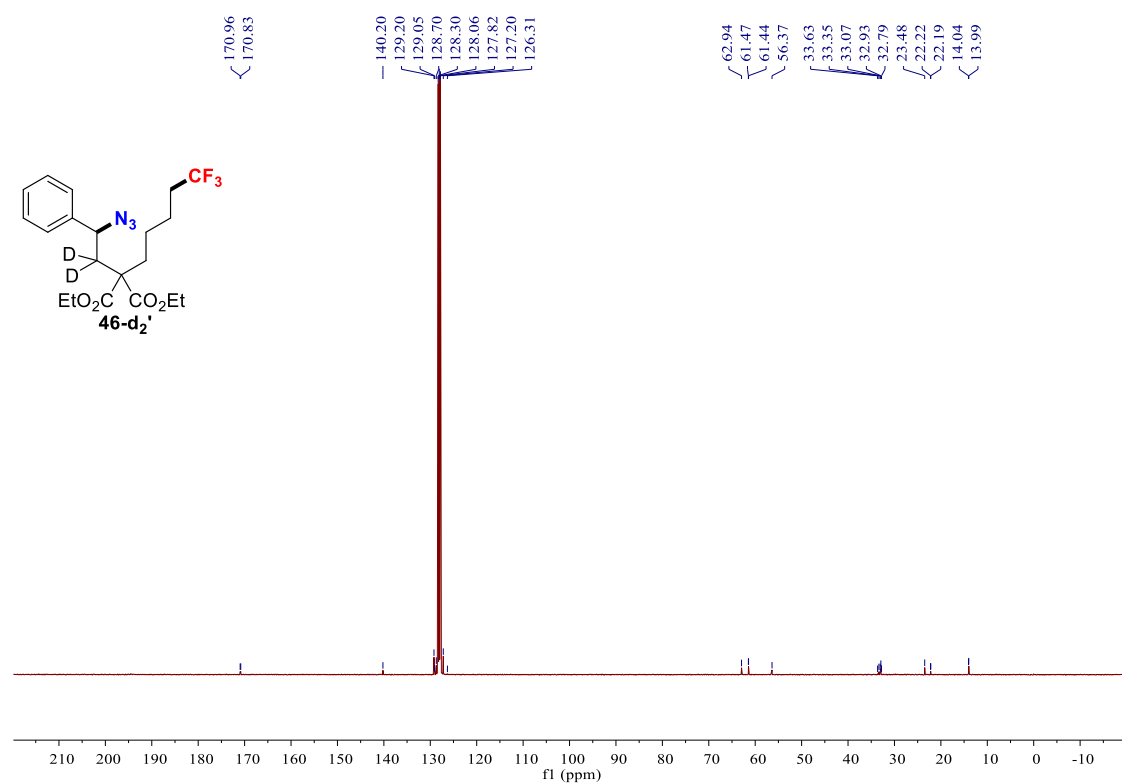

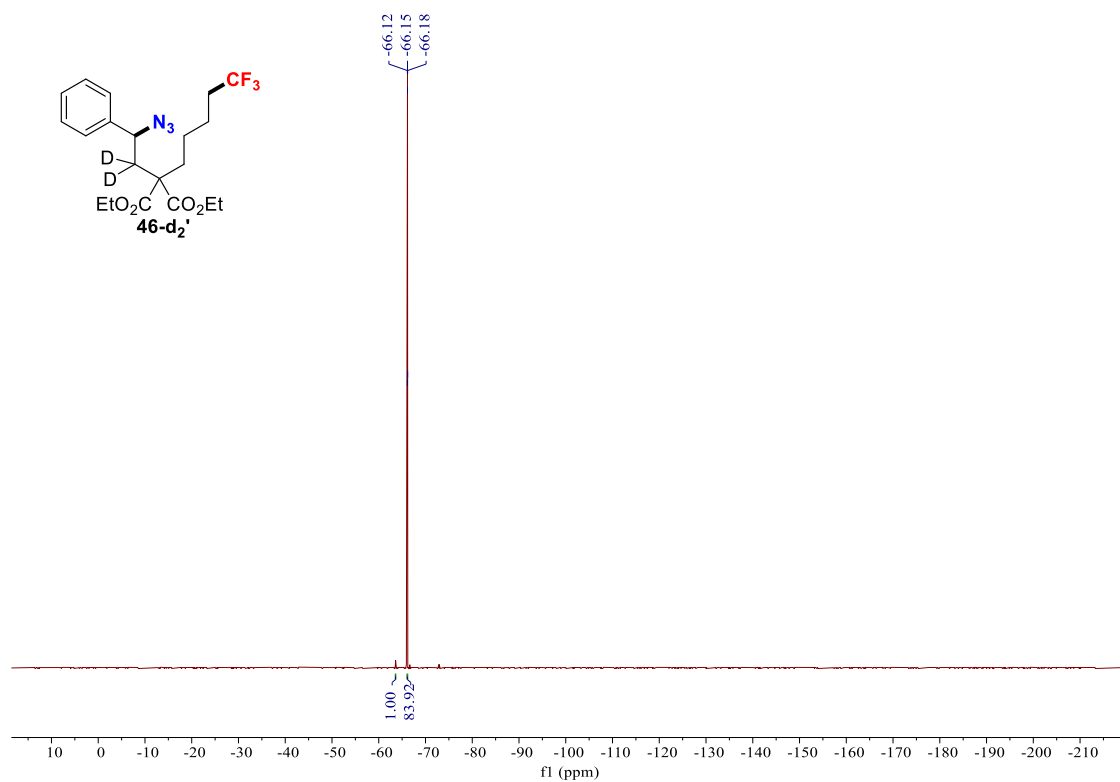

### Alternative testing:

BKJ-200902-5, 1, 1, 1r

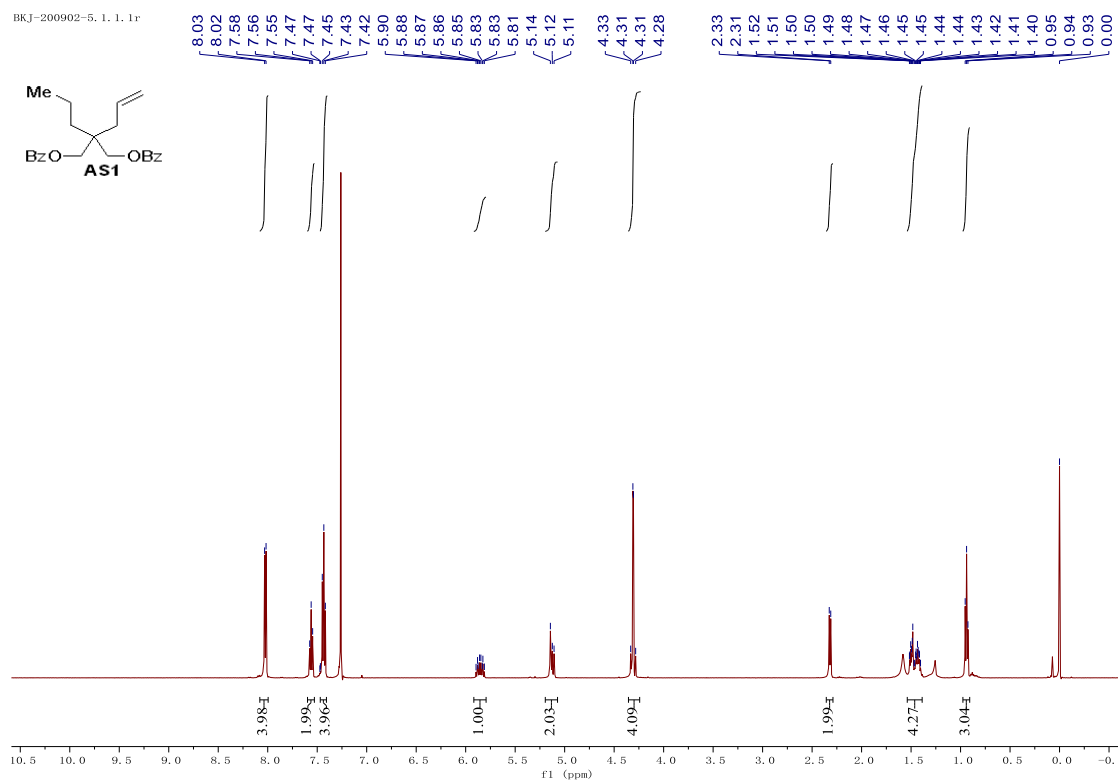

BKJ-200902-5, 2, 1, 1r

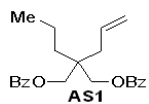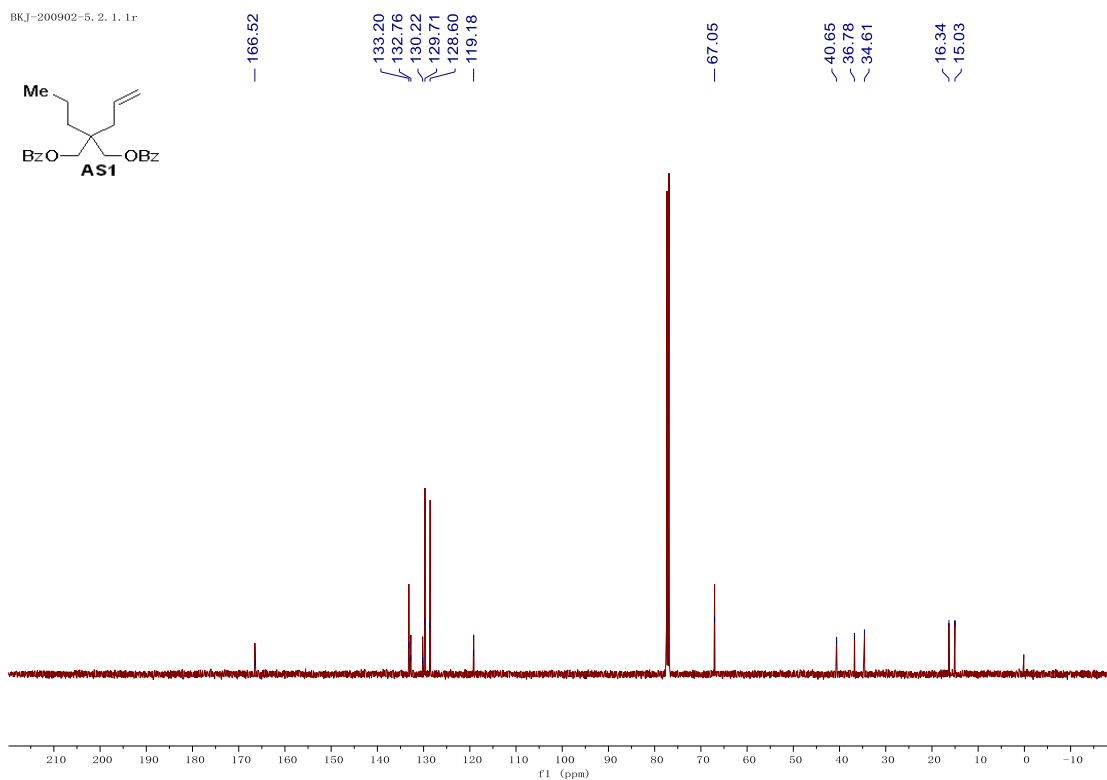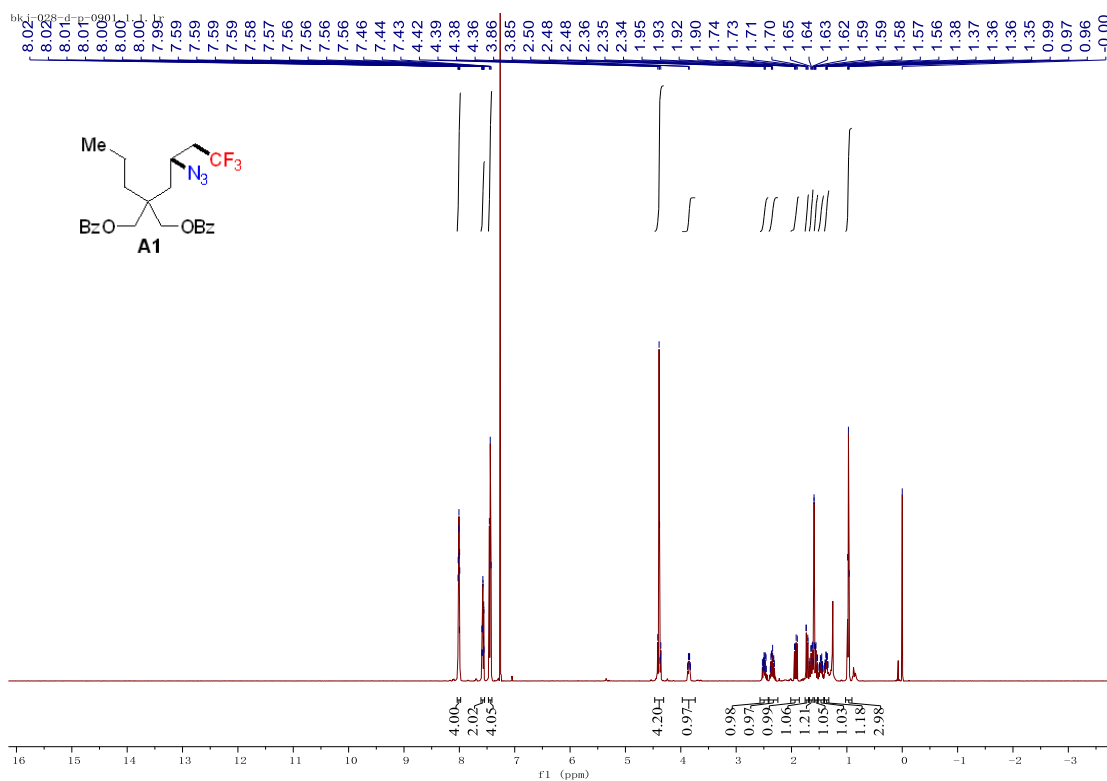

bkj-028-d-p-0901, 2, 1, 1r

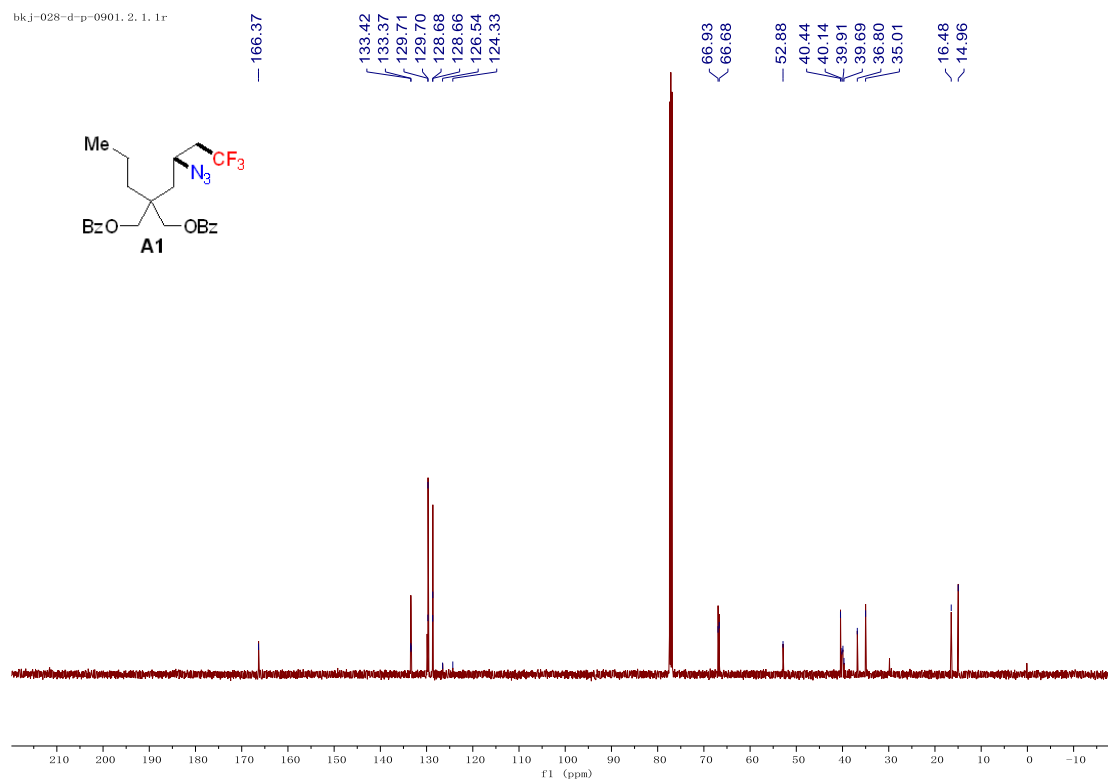

bkj-028-d-p-0901, 3, 1, 1r

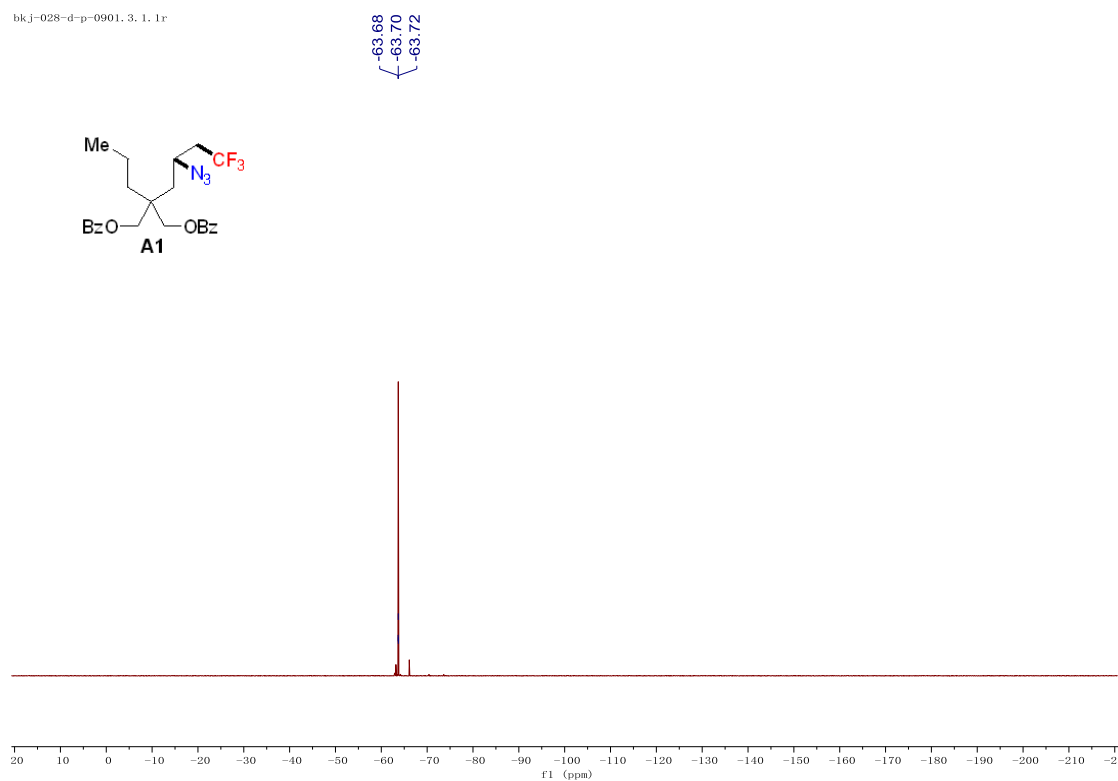



bkj-028-a-1-p-0901, 3, 1, 1r

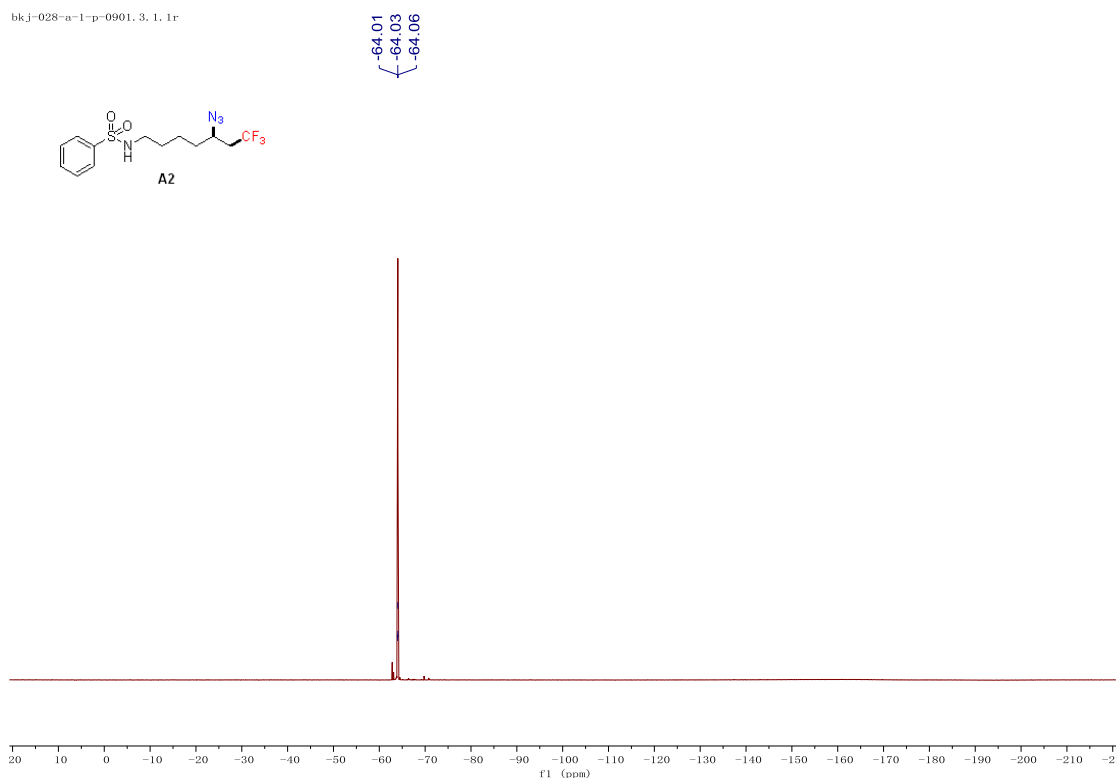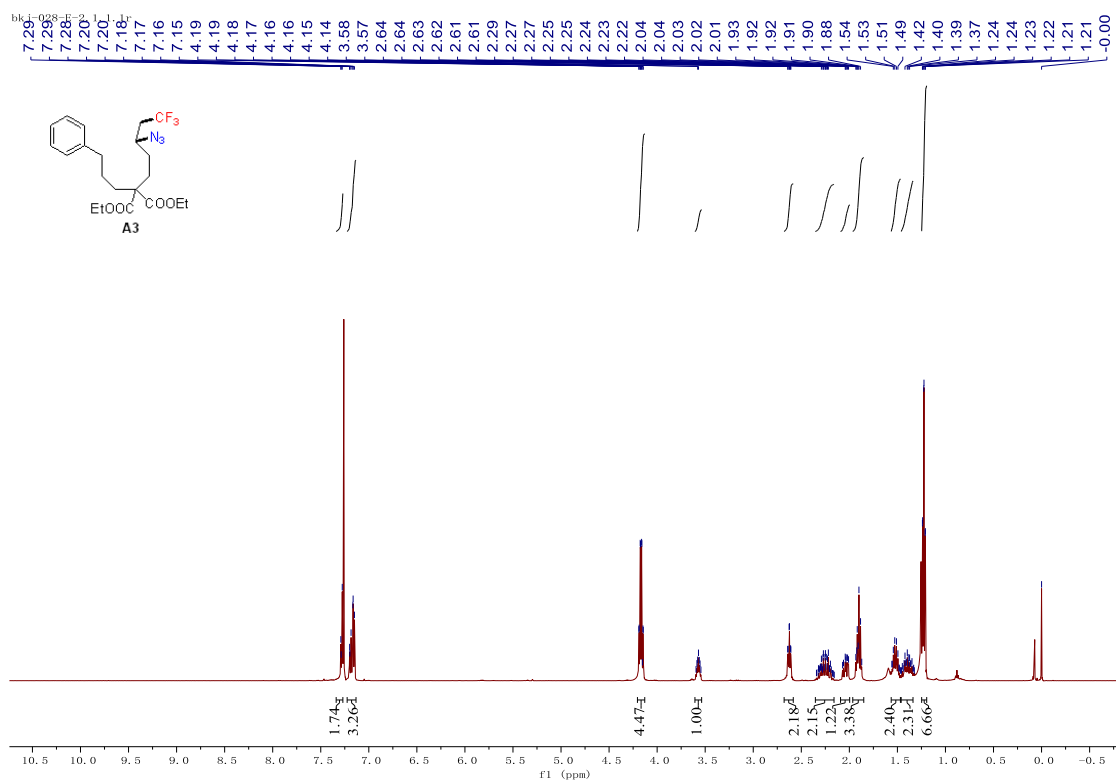

bkj-028-E-2. 3. 1. 1r

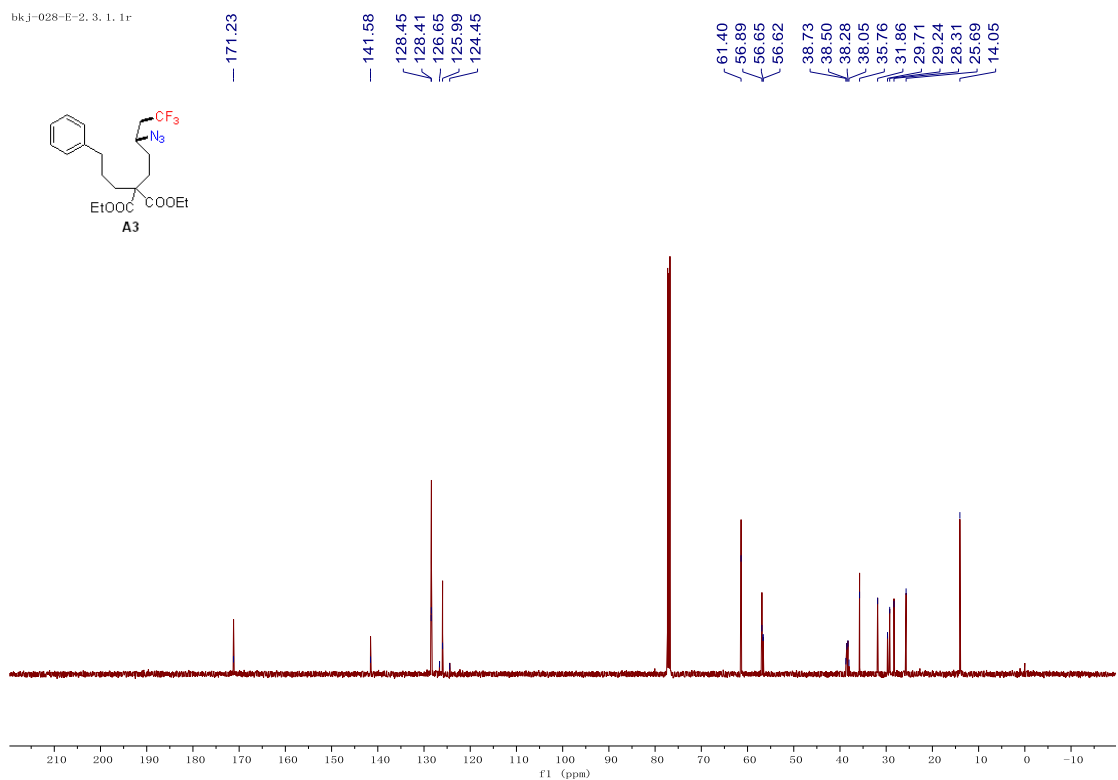

bkj-028-E-2. 2. 1. 1r

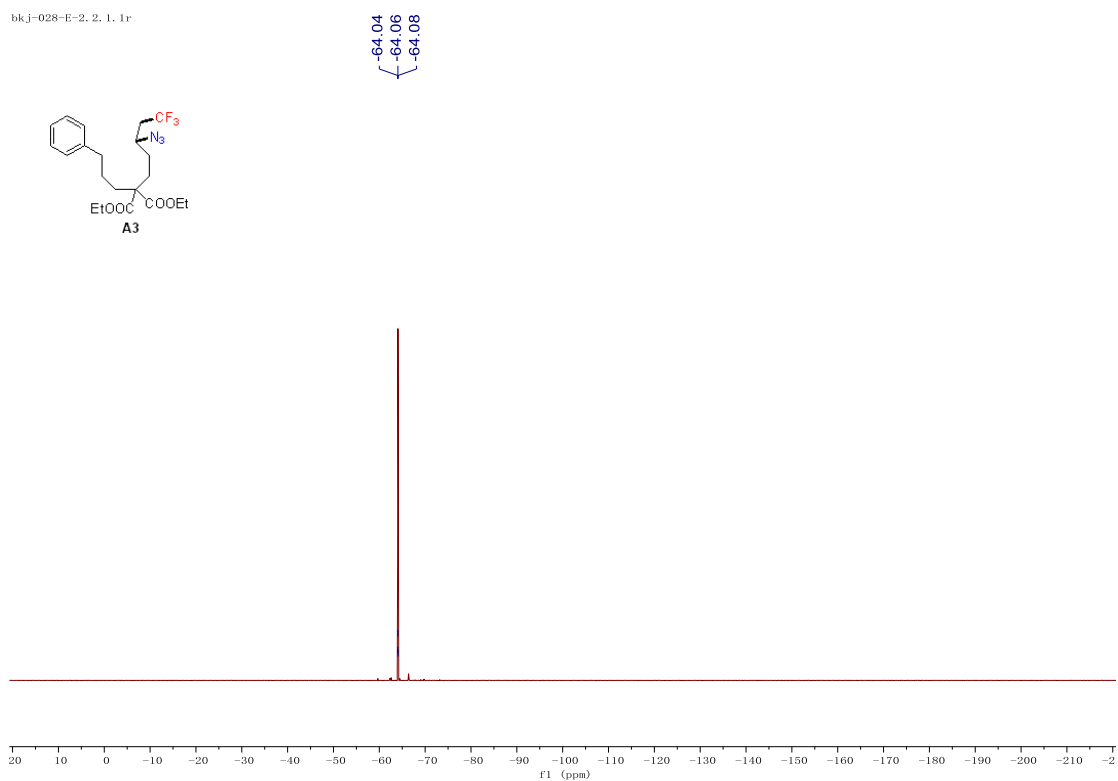

Supplement: d0sc03987j1.pdf [file d0sc03987j1.pdf]
